# Supplementary material for: Soil microbial diversity and network organization respond to land use and agricultural inputs worldwide
Source: Research Square preprint supplement (doi:10.21203/rs.3.rs-8192243/v1), 2025-12-03
Supplement: Supplementary file 1 [file 23b912b62bc0114c2645b236.xlsx]

## Sheet: Hoja1
Supplementary Table 1. Metadata and environmental variables for soil samples included in this study. The table provides geographic, ecological, and management information for each soil sample, including location, biome classification, land use, crop species, and records of pesticide and fertilizer application. Bioclimatic variables (bio1–bio19) correspond to the WorldClim dataset and represent te…
SampleID	Date	Area	Country	Latitude	Longitude	1_nivel	Sp._nivel	Biomes	Biomes_general	Pesticides_yes-no	Fertilizers_yes-no	Fertilizer_chemical_organic	bio 1	bio 2	bio 3	bio 4	bio 5	bio 6	bio 7	bio 8	bio 9	bio10	bio11	bio12	bio13	bio14	bio15	bio16	bio17	bio18	bio19
C620LJ	2021-04-18	Southern South America	Argentina	-34.13209	-60.6975	Crop	Glycine_max_-Soybean-	Grasslands	Grasslands	Yes	Yes	Chemical	16.35	13.1	48.6989	512.339	30.6	3.7	26.9	21.8667	9.93333	22.6667	9.93333	972	141	33	44.5505	367	109	324	109
C620LC	2021-04-20	Southern South America	Argentina	-34.21507	-60.63625	Crop	Sorghum_bicolor_-Sorghum-	Grasslands	Grasslands	Yes	Yes	Chemical	16.3917	13.15	48.7037	511.819	30.7	3.7	27	21.9167	9.98333	22.7	9.98333	973	140	32	43.3923	363	110	321	110
C620LD	2021-04-20	Southern South America	Argentina	-34.20499	-60.63445	Crop	Sorghum_bicolor_-Sorghum-	Grasslands	Grasslands	Yes	Yes	Chemical	16.3708	13.1417	48.6728	511.875	30.7	3.7	27	21.9	9.98333	22.6833	9.98333	974	141	32	43.5323	364	110	321	110
C620LE	2021-04-20	Southern South America	Argentina	-34.20336	-60.63445	Crop	Sorghum_bicolor_-Sorghum-	Grasslands	Grasslands	Yes	Yes	Chemical	16.3708	13.1417	48.6728	511.875	30.7	3.7	27	21.9	9.98333	22.6833	9.98333	974	141	32	43.5323	364	110	321	110
C620LH	2021-04-20	Southern South America	Argentina	-34.20437	-60.64196	Crop	Sorghum_bicolor_-Sorghum-	Grasslands	Grasslands	Yes	Yes	Chemical	16.3792	13.1583	48.7346	512.181	30.7	3.7	27	21.9	9.96667	22.6833	9.96667	972	140	32	43.5282	363	110	321	110
C620LB	2021-04-20	Southern South America	Argentina	-34.21443	-60.63342	Crop	Zea_mays_-Corn-	Grasslands	Grasslands	Yes	Yes	Chemical	16.3917	13.15	48.7037	511.819	30.7	3.7	27	21.9167	9.98333	22.7	9.98333	973	140	32	43.3923	363	110	321	110
C620LF	2021-04-20	Southern South America	Argentina	-34.19882	-60.64003	Crop	Zea_mays_-Corn-	Grasslands	Grasslands	Yes	Yes	Chemical	16.3708	13.1583	48.7346	512.185	30.7	3.7	27	21.9	9.96667	22.6833	9.96667	972	140	32	43.3976	363	111	321	111
C620LG	2021-04-20	Southern South America	Argentina	-34.20038	-60.64681	Crop	Zea_mays_-Corn-	Grasslands	Grasslands	Yes	Yes	Chemical	16.3792	13.1583	48.7346	512.181	30.7	3.7	27	21.9	9.96667	22.6833	9.96667	972	140	32	43.5282	363	110	321	110
C620LA	2021-04-20	Southern South America	Argentina	-34.21097	-60.63445	Crop	Glycine_max_-Soybean-	Grasslands	Grasslands	Yes	Yes	Chemical	16.3917	13.15	48.7037	511.819	30.7	3.7	27	21.9167	9.98333	22.7	9.98333	973	140	32	43.3923	363	110	321	110
C620LI	2021-04-20	Southern South America	Argentina	-34.21266	-60.64724	Crop	Glycine_max_-Soybean-	Grasslands	Grasslands	Yes	Yes	Chemical	16.3833	13.1333	48.642	512.118	30.7	3.7	27	21.9167	9.98333	22.7	9.98333	974	140	32	43.4022	363	110	322	110
C620NB	2021-05-11	Southern South America	Argentina	-43.16416	-71.69499	Natural	Myrceugenia_exsucca	Southern_temperate_forest	Southern	No	No	No_data	9.93333	9.78333	44.2685	455.992	22.1	0	22.1	4.73333	14.95	15.3833	4.08333	1445	217	61	47.6963	610	198	212	558
C620NA	2021-05-14	Southern South America	Argentina	-42.66833	-71.69083	Natural	Nothofagus_dombeyi	Southern_temperate_forest	Southern	No	No	No_data	8.90833	10.4667	47.3605	440.65	21.1	-1	22.1	4.01667	13.8667	14.2667	3.33333	1179	180	47	52.898	525	156	157	486
C620N9	2021-05-17	Southern South America	Argentina	-43.54222	-71.58638	Natural	Pilgerodendron_uviferum	Southern_temperate_forest	Southern	No	No	No_data	8.80833	9.9	44.7964	450.585	20.9	-1.2	22.1	3.6	13.8167	14.2	3.06667	1065	156	44	45.9795	443	147	153	403
C620N7	2021-05-23	Southern South America	Argentina	-42.83027	-71.45638	Natural	Nothofagus_pumilio	Southern_temperate_forest	Southern	No	No	No_data	6.33333	10.8	47.7876	447.581	18.7	-3.9	22.6	1.38333	11.7833	11.7833	0.716667	727	112	27	52.3411	317	92	92	309
C620N8	2021-05-23	Southern South America	Argentina	-42.88457	-71.37926	Natural	Patagonian_steppe	Southern_temperate_forest	Southern	No	No	No_data	8.25	11.6667	48.4094	473.517	21.6	-2.5	24.1	2.91667	13.5333	14.05	2.33333	714	106	28	51.3414	316	96	96	288
C620N3	2021-05-25	Southern South America	Argentina	-42.80506	-71.71609	Natural	Austrocedrus_chilensis	Southern_temperate_forest	Southern	No	No	No_data	7.75	10.0167	46.5891	435.478	19.5	-2	21.5	2.98333	12.7	13.0333	2.25	1129	170	46	51.2205	495	151	152	465
C620N5	2021-05-25	Southern South America	Argentina	-42.75159	-71.72741	Natural	Nothofagus_antarctica	Southern_temperate_forest	Southern	No	No	No_data	6.85	10.0833	46.8992	432.587	18.6	-2.9	21.5	2.11667	12.1	12.1	1.4	1067	157	43	48.4248	452	145	145	431
C620N4	2021-05-25	Southern South America	Argentina	-42.74277	-71.73694	Natural	Nothofagus_dombeyi	Southern_temperate_forest	Southern	No	No	No_data	8.0875	10.025	46.8458	432.861	19.8	-1.6	21.4	3.31667	13	13.3333	2.61667	1198	179	49	49.7233	514	163	164	486
C620N6	2021-05-25	Southern South America	Argentina	-42.75527	-71.7275	Natural	Nothofagus_pumilio	Southern_temperate_forest	Southern	No	No	No_data	6.85	10.0833	46.8992	432.587	18.6	-2.9	21.5	2.11667	12.1	12.1	1.4	1067	157	43	48.4248	452	145	145	431
C620N2	2021-05-26	Southern South America	Argentina	-43.02795	-70.60722	Natural	Pasture	Shrublands	Shrublands	No	No	No_data	9.7625	12.925	48.4082	527.529	24.5	-2.2	26.7	3.71667	16.2333	16.2333	3.23333	347	54	14	50.6424	155	45	45	137
C620N1	2021-06-01	Southern South America	Argentina	-43.18299	-71.47926	Natural	Austrocedrus_chilensis	Southern_temperate_forest	Southern	No	No	No_data	9.48333	10.7	46.3203	464.231	22.1	-1	23.1	4.15	14.6167	15.0667	3.58333	1011	153	40	48.9053	433	136	144	394
C620N0	2021-06-01	Southern South America	Argentina	-43.183971	-71.383123	Natural	Nothofagus_antarctica	Southern_temperate_forest	Southern	No	No	No_data	8.23333	10.9	47.1861	462.185	20.8	-2.3	23.1	2.96667	13.4	13.8167	2.4	773	115	30	50.3825	339	104	105	310
C620MY	2021-06-06	Southern South America	Argentina	-42.673296	-71.900228	Natural	Fitzroya_cupressoides	Southern_temperate_forest	Southern	No	No	No_data	7.77917	9.79167	46.8501	420.424	19.3	-1.6	20.9	3.21667	12.5833	12.9	2.48333	1350	196	56	48.5265	572	187	187	545
C620MZ	2021-06-06	Southern South America	Argentina	-42.742524	-72.000591	Natural	Fitzroya_cupressoides	Southern_temperate_forest	Southern	No	No	No_data	8.55417	9.50833	46.157	411.872	19.9	-0.7	20.6	4.03333	13.2333	13.55	3.35	1611	234	70	47.4814	680	227	231	639
C620MX	2021-06-09	Southern South America	Argentina	-43.029432	-71.57875	Natural	Nothofagus_pumilio	Southern_temperate_forest	Southern	No	No	No_data	5.88333	10.1333	46.6974	437.598	17.6	-4.1	21.7	1.01667	11.1833	11.1833	0.366667	847	128	31	49.7108	362	109	109	349
C620L4	2021-06-16	Southern South America	Argentina	-34.20336	-60.63445	Crop	Sorghum_bicolor_-Sorghum-	Grasslands	Grasslands	Yes	Yes	Chemical	16.3708	13.1417	48.6728	511.875	30.7	3.7	27	21.9	9.98333	22.6833	9.98333	974	141	32	43.5323	364	110	321	110
C620L7	2021-06-16	Southern South America	Argentina	-34.20437	-60.64196	Crop	Sorghum_bicolor_-Sorghum-	Grasslands	Grasslands	Yes	Yes	Chemical	16.3792	13.1583	48.7346	512.181	30.7	3.7	27	21.9	9.96667	22.6833	9.96667	972	140	32	43.5282	363	110	321	110
C620LM	2021-06-16	Southern South America	Argentina	-34.21507	-60.63625	Crop	Sorghum_bicolor_-Sorghum-	Grasslands	Grasslands	Yes	Yes	Chemical	16.3917	13.15	48.7037	511.819	30.7	3.7	27	21.9167	9.98333	22.7	9.98333	973	140	32	43.3923	363	110	321	110
C620L5	2021-06-16	Southern South America	Argentina	-34.19882	-60.64003	Crop	Zea_mays_-Corn-	Grasslands	Grasslands	Yes	Yes	Chemical	16.3708	13.1583	48.7346	512.185	30.7	3.7	27	21.9	9.96667	22.6833	9.96667	972	140	32	43.3976	363	111	321	111
C620L6	2021-06-16	Southern South America	Argentina	-34.20038	-60.64681	Crop	Zea_mays_-Corn-	Grasslands	Grasslands	Yes	Yes	Chemical	16.3792	13.1583	48.7346	512.181	30.7	3.7	27	21.9	9.96667	22.6833	9.96667	972	140	32	43.5282	363	110	321	110
C620LL	2021-06-16	Southern South America	Argentina	-34.21443	-60.63342	Crop	Zea_mays_-Corn-	Grasslands	Grasslands	Yes	Yes	Chemical	16.3917	13.15	48.7037	511.819	30.7	3.7	27	21.9167	9.98333	22.7	9.98333	973	140	32	43.3923	363	110	321	110
C620L8	2021-06-16	Southern South America	Argentina	-34.21266	-60.64724	Crop	Glycine_max_-Soybean-	Grasslands	Grasslands	Yes	Yes	Chemical	16.3833	13.1333	48.642	512.118	30.7	3.7	27	21.9167	9.98333	22.7	9.98333	974	140	32	43.4022	363	110	322	110
C620LK	2021-06-16	Southern South America	Argentina	-34.21097	-60.63445	Crop	Glycine_max_-Soybean-	Grasslands	Grasslands	Yes	Yes	Chemical	16.3917	13.15	48.7037	511.819	30.7	3.7	27	21.9167	9.98333	22.7	9.98333	973	140	32	43.3923	363	110	321	110
C620LN	2021-06-16	Southern South America	Argentina	-34.20499	-60.63445	Crop	Glycine_max_-Soybean-	Grasslands	Grasslands	Yes	Yes	Chemical	16.3708	13.1417	48.6728	511.875	30.7	3.7	27	21.9	9.98333	22.6833	9.98333	974	141	32	43.5323	364	110	321	110
C620MW	2021-06-18	Southern South America	Argentina	-42.717178	-71.751453	Natural	Nothofagus_dombeyi	Southern_temperate_forest	Southern	No	No	No_data	8.30417	9.925	46.816	427.458	19.9	-1.3	21.2	3.6	13.1667	13.5	2.91667	1183	175	49	49.0445	506	162	163	472
C620L9	2021-06-21	Southern South America	Argentina	-34.132153	-60.697268	Crop	Glycine_max_-Soybean-	Grasslands	Grasslands	Yes	Yes	Chemical	16.35	13.1	48.6989	512.339	30.6	3.7	26.9	21.8667	9.93333	22.6667	9.93333	972	141	33	44.5505	367	109	324	109
C620MV	2021-08-04	Southern South America	Argentina	-42.663181	-71.821488	Natural	Nothofagus_dombeyi	Southern_temperate_forest	Southern	No	No	No_data	7.60417	9.84167	46.8651	421.207	19.1	-1.9	21	3	12.7333	12.7333	2.31667	1216	181	49	48.6469	515	166	166	489
C620MU	2021-08-08	Southern South America	Argentina	-42.740618	-72.007092	Natural	Fitzroya_cupressoides_	Southern_temperate_forest	Southern	No	No	No_data	8.3625	9.50833	46.157	412.218	19.7	-0.9	20.6	3.83333	13.05	13.3667	3.15	1572	227	67	47.4735	663	220	225	624
C62128	2021-09-20	Southern South America	Argentina	-39.336384	-65.778103	Crop	Juglans_regia_-Walnut-	Southern_temperate_forest	Southern	No_data	No_data	No_data	15.2	15.25	49.6743	585.65	31.6	0.9	30.7	18.95	7.98333	22.4	7.98333	297	35	16	21.1496	87	57	71	57
C62129	2021-09-22	Southern South America	Argentina	-39.343109	-65.719527	Crop	Juglans_regia_-Walnut-	Southern_temperate_forest	Southern	No_data	No_data	No_data	15.2542	15.3583	49.7033	589.273	31.8	0.9	30.9	19.0167	8	22.5	8	296	35	16	21.0359	86	57	71	57
C620MT	2021-09-23	Southern South America	Argentina	-42.863615	-71.773073	Natural	Nothofagus_dombeyi	Southern_temperate_forest	Southern	No	No	No_data	8.14583	9.84167	45.7752	436.726	19.9	-1.6	21.5	3.3	13.0667	13.4167	2.6	1230	177	52	48.2538	524	171	174	489
C6212A	2021-09-23	Southern South America	Argentina	-39.321364	-65.821622	Crop	Juglans_regia_-Walnut-	Southern_temperate_forest	Southern	No_data	No_data	No_data	15.1958	15.2417	49.9727	582.972	31.5	1	30.5	18.9333	8.01667	22.3667	8.01667	300	36	16	21.6952	89	56	72	56
C62121	2021-09-27	Southern South America	Argentina	-28.29882	-55.889286	Natural	Monte_nativo	Grasslands	Grasslands	No	No	No_data	20.7042	11.975	51.3949	410.496	32.6	9.3	23.3	20.6833	15.6667	25.7667	15.6667	1636	174	95	15.8602	480	343	385	343
C6211J	2021-09-27	Southern South America	Argentina	-28.181886	-56.007145	Crop	Ilex_paraguariensis_-Yerba_mate-	Grasslands	Grasslands	Yes	Yes	Chemical	20.6417	11.5833	51.0279	403.923	32.2	9.5	22.7	20.6167	15.7	25.6333	15.7	1625	171	93	16.2822	474	332	390	332
C6211K	2021-09-27	Southern South America	Argentina	-28.211259	-55.975307	Crop	Ilex_paraguariensis_-Yerba_mate-	Grasslands	Grasslands	Yes	Yes	Chemical	20.625	11.7667	51.3828	405.858	32.3	9.4	22.9	20.6167	16.5667	25.6333	15.65	1628	172	93	16.4426	477	335	385	337
C6211P	2021-09-27	Southern South America	Argentina	-28.181453	-55.982914	Crop	Ilex_paraguariensis_-Yerba_mate-	Grasslands	Grasslands	Yes	Yes	Chemical	20.7458	11.5917	51.0646	404.489	32.3	9.6	22.7	20.7333	16.7167	25.7333	15.7833	1629	171	94	16.1062	475	334	388	337
C6211R	2021-09-27	Southern South America	Argentina	-28.200368	-55.979156	Crop	Ilex_paraguariensis_-Yerba_mate-	Grasslands	Grasslands	Yes	Yes	Chemical	20.5917	11.7	51.3158	404.957	32.2	9.4	22.8	20.5833	16.55	25.5833	15.6167	1627	171	93	16.3012	476	334	386	337
C6211U	2021-09-27	Southern South America	Argentina	-28.155324	-55.962638	Crop	Ilex_paraguariensis_-Yerba_mate-	Grasslands	Grasslands	Yes	Yes	Chemical	20.6	11.5833	51.2537	402.983	32.1	9.5	22.6	20.5833	16.5833	25.5833	15.6667	1639	173	94	16.2538	479	335	391	339
C6211W	2021-09-27	Southern South America	Argentina	-28.181012	-55.983891	Crop	Ilex_paraguariensis_-Yerba_mate-	Grasslands	Grasslands	Yes	Yes	Chemical	20.65	11.5833	51.0279	403.913	32.2	9.5	22.7	20.6333	16.6167	25.6333	15.7	1632	171	94	16.0161	475	335	391	336
C6211Y	2021-09-27	Southern South America	Argentina	-28.026963	-55.967348	Crop	Ilex_paraguariensis_-Yerba_mate-	Grasslands	Grasslands	Yes	Yes	Chemical	20.8375	11.675	51.6593	402.995	32.3	9.7	22.6	20.8333	16.8167	25.7833	15.8833	1654	172	95	16.1495	475	333	400	343
C62120	2021-09-27	Southern South America	Argentina	-28.211247	-55.975451	Crop	Ilex_paraguariensis_-Yerba_mate-	Grasslands	Grasslands	Yes	Yes	Chemical	20.625	11.7667	51.3828	405.858	32.3	9.4	22.9	20.6167	16.5667	25.6333	15.65	1628	172	93	16.4426	477	335	385	337
C62127	2021-09-27	Southern South America	Argentina	-28.182102	-56.007597	Crop	Ilex_paraguariensis_-Yerba_mate-	Grasslands	Grasslands	Yes	Yes	Chemical	20.6417	11.5833	51.0279	403.923	32.2	9.5	22.7	20.6167	15.7	25.6333	15.7	1625	171	93	16.2822	474	332	390	332
C6212B	2021-09-27	Southern South America	Argentina	-39.284306	-65.73263	Crop	Juglans_regia_-Walnut-	Southern_temperate_forest	Southern	No_data	No_data	No_data	15.2375	14.9583	49.3674	582.983	31.5	1.2	30.3	18.9333	8.05	22.4167	8.05	298	36	16	21.8248	88	57	71	57
C6212N	2021-09-28	Southern South America	Argentina	-42.965781	-71.609229	Natural	No_data	Southern_temperate_forest	Southern	No	No	No_data	6.33333	10.3333	46.9697	443.746	18.3	-3.7	22	1.41667	11.7	11.7	0.733333	967	154	35	53.8628	427	119	119	417
C6212O	2021-09-28	Southern South America	Argentina	-42.953894	-71.594634	Natural	No_data	Southern_temperate_forest	Southern	No	No	No_data	8.6125	10.575	46.792	453.307	21	-1.6	22.6	3.5	13.65	14.0833	2.85	1066	156	43	50.9497	466	142	147	433
C6212P	2021-09-28	Southern South America	Argentina	-42.950882	-71.582049	Natural	No_data	Southern_temperate_forest	Southern	No	No	No_data	8.75417	10.725	47.2467	454.665	21.2	-1.5	22.7	3.6	13.7833	14.2333	2.98333	1035	154	42	50.4609	452	139	144	415
C6212Q	2021-09-28	Southern South America	Argentina	-42.905283	-71.603196	Natural	No_data	Southern_temperate_forest	Southern	No	No	No_data	9.02917	10.3417	46.5841	447.698	21.2	-1	22.2	4.01667	14.0333	14.45	3.35	1084	163	44	50.3029	470	145	151	432
C6212R	2021-09-28	Southern South America	Argentina	-42.852855	-71.600396	Natural	No_data	Southern_temperate_forest	Southern	No	No	No_data	8.90417	10.225	46.4773	444.054	20.9	-1.1	22	3.95	13.9	14.2667	3.28333	1074	161	44	49.7528	464	146	150	425
C6212S	2021-09-28	Southern South America	Argentina	-42.810206	-71.708918	Natural	No_data	Southern_temperate_forest	Southern	No	No	No_data	8.32083	9.95833	46.3178	436.32	20.1	-1.4	21.5	3.53333	13.2667	13.6	2.8	1170	168	49	49.0501	503	161	164	467
C6212C	2021-09-28	Southern South America	Argentina	-39.194139	-66.130959	Crop	Juglans_regia_-Walnut-	Southern_temperate_forest	Southern	No_data	No_data	No_data	15.3167	15.2667	49.5671	590.14	31.9	1.1	30.8	19.1167	8.05	22.5833	8.05	319	37	14	23.2116	97	61	79	61
C6212D	2021-09-28	Southern South America	Argentina	-39.174268	-66.11726	Crop	Juglans_regia_-Walnut-	Southern_temperate_forest	Southern	No_data	No_data	No_data	15.4	15.3167	49.2497	596.295	32.2	1.1	31.1	19.2333	8.06667	22.7667	8.06667	317	37	14	24.1671	97	57	81	57
C6212T	2021-09-29	Southern South America	Argentina	-42.815196	-71.714529	Natural	No_data	Southern_temperate_forest	Southern	No	No	No_data	8.32083	9.95833	46.3178	436.32	20.1	-1.4	21.5	3.53333	13.2667	13.6	2.8	1170	168	49	49.0501	503	161	164	467
C6212U	2021-09-29	Southern South America	Argentina	-42.799136	-71.719352	Natural	No_data	Southern_temperate_forest	Southern	No	No	No_data	8.53333	10.15	46.347	442.186	20.6	-1.3	21.9	3.65	13.5333	13.8667	2.91667	1231	178	50	49.9498	531	165	170	497
C6212V	2021-09-29	Southern South America	Argentina	-42.784388	-71.724857	Natural	No_data	Southern_temperate_forest	Southern	No	No	No_data	8.175	10.2	46.5753	442.156	20.2	-1.7	21.9	3.3	13.15	13.5333	2.56667	1196	174	49	49.2906	513	162	165	479
C6217R	2021-09-29	Southern South America	Argentina	-42.777815	-71.731296	Natural	No_data	Southern_temperate_forest	Southern	No	No	No_data	8.55	10.2167	46.6514	442.246	20.6	-1.3	21.9	3.66667	13.5167	13.8833	2.91667	1217	178	50	48.7766	519	167	171	482
C6217S	2021-09-29	Southern South America	Argentina	-42.772397	-71.733689	Natural	No_data	Southern_temperate_forest	Southern	No	No	No_data	8.81667	10.15	46.5596	440.239	20.8	-1	21.8	3.95	13.7667	14.1333	3.21667	1264	184	52	49.2752	542	172	177	504
C6217T	2021-09-29	Southern South America	Argentina	-42.748542	-71.749345	Natural	No_data	Southern_temperate_forest	Southern	No	No	No_data	8.60417	9.975	46.6122	432.29	20.3	-1.1	21.4	3.83333	13.5	13.8333	3.13333	1249	185	52	49.402	536	171	174	500
C6212E	2021-10-04	Southern South America	Argentina	-39.323509	-65.6806	Crop	Juglans_regia_-Walnut-	Southern_temperate_forest	Southern	No_data	No_data	No_data	15.275	15.1667	49.5643	586.164	31.7	1.1	30.6	14.8667	8.06667	22.4833	8.06667	296	35	16	21.1667	85	58	70	58
C6212F	2021-10-05	Southern South America	Argentina	-39.371678	-65.807951	Crop	Juglans_regia_-Walnut-	Southern_temperate_forest	Southern	No_data	No_data	No_data	15.2208	15.2583	49.7014	587.067	31.7	1	30.7	18.9833	7.98333	22.4333	7.98333	297	35	16	20.757	87	58	71	58
C6212G	2021-10-05	Southern South America	Argentina	-39.40512	-65.703272	Crop	Juglans_regia_-Walnut-	Southern_temperate_forest	Southern	No_data	No_data	No_data	15.1833	15.15	49.6721	583.704	31.5	1	30.5	18.9333	8	22.35	8	295	35	16	20.3761	85	58	70	58
C6212H	2021-10-06	Southern South America	Argentina	-39.303577	-65.671681	Crop	Juglans_regia_-Walnut-	Southern_temperate_forest	Southern	No_data	No_data	No_data	15.3042	15.1083	49.3736	588.359	31.8	1.2	30.6	19.05	8.06667	22.55	8.06667	297	36	16	21.535	87	57	70	57
C6211Q	2021-10-07	Southern South America	Argentina	-28.126384	-55.869986	Crop	Ilex_paraguariensis_-Yerba_mate-	Grasslands	Grasslands	Yes	Yes	Chemical	20.6875	11.6583	51.3583	404.324	32.2	9.5	22.7	20.6833	16.6833	25.6667	15.7333	1657	176	96	15.673	480	341	397	348
C6211V	2021-10-07	Southern South America	Argentina	-27.950793	-55.866239	Crop	Ilex_paraguariensis_-Yerba_mate-	Grasslands	Grasslands	Yes	Yes	Chemical	20.7042	11.5917	51.7485	399.4	32	9.6	22.4	20.7	16.75	25.6	15.8	1682	177	96	16.1079	483	337	408	352
C6211Z	2021-10-07	Southern South America	Argentina	-27.950684	-55.866722	Crop	Ilex_paraguariensis_-Yerba_mate-	Grasslands	Grasslands	Yes	Yes	Chemical	20.7583	11.5667	51.6369	401.003	32.1	9.7	22.4	20.7333	16.8	25.6833	15.85	1678	175	96	15.8712	481	337	407	352
C62126	2021-10-07	Southern South America	Argentina	-27.951336	-55.866874	Crop	Ilex_paraguariensis_-Yerba_mate-	Grasslands	Grasslands	Yes	Yes	Chemical	20.7583	11.5667	51.6369	401.003	32.1	9.7	22.4	20.7333	16.8	25.6833	15.85	1678	175	96	15.8712	481	337	407	352
C6211L	2021-10-08	Southern South America	Argentina	-28.131243	-55.979226	Natural	Eucalyptus_globulus	Grasslands	Grasslands	No	No	No_data	20.6708	11.5417	51.0693	402.28	32.2	9.6	22.6	20.65	16.6667	25.65	15.7667	1637	172	94	16.2587	476	334	391	339
C6211X	2021-10-08	Southern South America	Argentina	-28.091921	-56.055947	Natural	Monte_nativo	Grasslands	Grasslands	No	No	No_data	20.775	11.6333	51.2482	402.811	32.3	9.6	22.7	20.7833	16.75	25.7333	15.8333	1628	168	93	16.0895	468	330	393	334
C620MS	2021-10-08	Southern South America	Argentina	-42.703254	-71.749699	Natural	Nothofagus_pumilio	Southern_temperate_forest	Southern	No	No	No_data	6.64167	9.93333	47.0774	424.317	18.1	-3	21.1	2	11.8167	11.8167	1.33333	1039	155	40	48.1331	434	139	139	422
C6211N	2021-10-08	Southern South America	Argentina	-28.167217	-56.087975	Crop	Ilex_paraguariensis_-Yerba_mate-	Grasslands	Grasslands	Yes	Yes	Chemical	20.7458	11.825	51.413	406.434	32.5	9.5	23	20.75	15.7667	25.7667	15.7667	1608	168	91	17.059	469	320	389	320
C6211O	2021-10-08	Southern South America	Argentina	-28.118416	-55.928218	Crop	Ilex_paraguariensis_-Yerba_mate-	Grasslands	Grasslands	Yes	Yes	Chemical	20.6833	11.6167	51.1747	403.937	32.2	9.5	22.7	20.6833	16.65	25.6667	15.7333	1651	172	95	15.8912	477	337	395	346
C6211S	2021-10-08	Southern South America	Argentina	-28.121346	-55.919167	Crop	Ilex_paraguariensis_-Yerba_mate-	Grasslands	Grasslands	Yes	Yes	Chemical	20.7708	11.625	51.2115	404.41	32.3	9.6	22.7	20.75	16.7333	25.7667	15.8167	1646	172	95	15.8624	475	336	394	345
C62122	2021-10-08	Southern South America	Argentina	-28.120689	-55.923105	Crop	Ilex_paraguariensis_-Yerba_mate-	Grasslands	Grasslands	Yes	Yes	Chemical	20.7708	11.625	51.2115	404.41	32.3	9.6	22.7	20.75	16.7333	25.7667	15.8167	1646	172	95	15.8624	475	336	394	345
C62123	2021-10-08	Southern South America	Argentina	-28.168498	-56.088592	Crop	Ilex_paraguariensis_-Yerba_mate-	Grasslands	Grasslands	Yes	Yes	Chemical	20.7458	11.825	51.413	406.434	32.5	9.5	23	20.75	15.7667	25.7667	15.7667	1608	168	91	17.059	469	320	389	320
C62124	2021-10-08	Southern South America	Argentina	-28.063235	-56.105761	Crop	Ilex_paraguariensis_-Yerba_mate-	Grasslands	Grasslands	No	No	No_data	20.85	11.7833	51.4556	406.18	32.5	9.6	22.9	20.85	16.7833	25.85	15.8667	1622	165	90	16.5489	462	323	398	328
C62125	2021-10-08	Southern South America	Argentina	-28.086342	-56.050049	Crop	Ilex_paraguariensis_-Yerba_mate-	Grasslands	Grasslands	No	No	No_data	20.75	11.6667	51.395	402.814	32.3	9.6	22.7	20.75	16.7333	25.7167	15.8167	1627	168	93	16.0997	468	330	393	333
C6211M	2021-10-08	Southern South America	Argentina	-28.067096	-56.018351	Natural	Pasture	Grasslands	Grasslands	No	No	No_data	20.8	11.6667	51.1696	405.821	32.4	9.6	22.8	20.7833	16.75	25.8167	15.8167	1646	170	94	16.1096	473	331	401	337
C6211T	2021-10-13	Southern South America	Argentina	-28.146592	-55.977732	Natural	Pinus_spp.	Grasslands	Grasslands	No	No	No_data	20.6167	11.5333	51.0325	402.466	32.1	9.5	22.6	20.6	16.6	25.5833	15.6833	1636	172	93	16.289	476	334	391	338
C6212I	2021-10-19	Southern South America	Argentina	-39.33182	-65.827842	Crop	Juglans_regia_-Walnut-	Southern_temperate_forest	Southern	No_data	No_data	No_data	15.2083	15.2833	49.9455	583.955	31.6	1	30.6	18.9833	8.01667	22.3833	8.01667	301	36	16	21.0281	88	58	72	58
C6212J	2021-10-19	Southern South America	Argentina	-39.283098	-65.721577	Crop	Juglans_regia_-Walnut-	Southern_temperate_forest	Southern	No_data	No_data	No_data	15.2375	14.9083	49.3653	582.14	31.5	1.3	30.2	18.9	8.06667	22.4	8.06667	298	36	17	21.1915	87	57	71	57
C6212K	2021-10-29	Southern South America	Argentina	-42.88405	-71.5969767	Natural	No_data	Southern_temperate_forest	Southern	No	No	No_data	8.99583	10.2917	46.3589	446.926	21.1	-1.1	22.2	4	14	14.4	3.31667	1056	159	44	49.5727	456	144	149	417
C6212L	2021-10-29	Southern South America	Argentina	-42.77404833	-71.729855	Natural	No_data	Southern_temperate_forest	Southern	No	No	No_data	8.19167	10.2	46.5753	439.937	20.2	-1.7	21.9	3.33333	13.15	13.5167	2.61667	1183	170	49	48.8272	505	162	165	471
C6212M	2021-10-29	Southern South America	Argentina	-42.61158968	-71.6459585	Natural	No_data	Southern_temperate_forest	Southern	No	No	No_data	8.68333	10.5667	47.5976	442.782	20.9	-1.3	22.2	3.81667	13.6833	14.0833	3.11667	1089	170	43	54.5041	494	141	141	455
C6217Z	2021-12-03	Southern South America	Argentina	-31.037114	-64.251943	Crop	Triticum_aestivum_-Wheat-	Tropical_dry_forest	Tropical	Yes	Yes	Chemical	14.75	12.8833	51.5333	438.463	26.8	1.8	25	20.2167	9.2	20.2167	9.2	726	110	9	66.4391	320	34	320	34
C62181	2021-12-03	Southern South America	Argentina	-30.948885	-64.244534	Crop	Triticum_aestivum_-Wheat-	Tropical_dry_forest	Tropical	Yes	Yes	Chemical	14.8208	13.0583	52.0252	439.367	26.9	1.8	25.1	20.2833	9.23333	20.2833	9.23333	712	108	9	66.0921	313	34	313	34
C62183	2021-12-03	Southern South America	Argentina	-30.90614	-64.250685	Crop	Triticum_aestivum_-Wheat-	Tropical_dry_forest	Tropical	Yes	Yes	Chemical	14.6958	13.0417	51.9588	438.014	26.8	1.7	25.1	20.15	9.13333	20.15	9.13333	702	108	9	66.8726	312	32	312	32
C620GO	2021-12-03	Southern South America	Argentina	-31.21631	-64.27012	Crop	Zea_mays_-Corn-	Tropical_dry_forest	Tropical	Yes	Yes	Chemical	15.6333	12.75	51	445.096	27.6	2.6	25	21.05	9.95	21.05	9.95	779	129	11	68.9935	355	35	355	35
C620GP	2021-12-03	Southern South America	Argentina	-31.216839	-64.249082	Crop	Zea_mays_-Corn-	Tropical_dry_forest	Tropical	Yes	Yes	Chemical	15.7958	13.0417	51.5481	446.046	27.8	2.5	25.3	21.2167	10.0833	21.2167	10.0833	792	133	11	69.1183	362	35	362	35
C620GQ	2021-12-03	Southern South America	Argentina	-31.195144	-64.281184	Crop	Zea_mays_-Corn-	Tropical_dry_forest	Tropical	Yes	Yes	Chemical	15.4417	12.6333	50.7363	444.414	27.4	2.5	24.9	20.8833	9.76667	20.8833	9.76667	765	125	10	69.1528	348	33	348	33
C620GR	2021-12-03	Southern South America	Argentina	-31.185956	-64.255955	Crop	Zea_mays_-Corn-	Tropical_dry_forest	Tropical	Yes	Yes	Chemical	15.45	12.85	51.4	443.417	27.4	2.4	25	20.8667	9.78333	20.8667	9.78333	771	126	10	68.7597	350	34	350	34
C620GT	2021-12-03	Southern South America	Argentina	-31.225508	-64.185131	Crop	Zea_mays_-Corn-	Tropical_dry_forest	Tropical	Yes	Yes	Chemical	16.2375	13.4417	52.0995	448.199	28.5	2.7	25.8	21.6167	10.4667	21.6167	10.4667	812	142	11	70.6282	377	35	377	35
C620GU	2021-12-03	Southern South America	Argentina	-31.039591	-64.130589	Crop	Zea_mays_-Corn-	Tropical_dry_forest	Tropical	Yes	Yes	Chemical	15.6583	13.4333	52.474	445.93	27.9	2.3	25.6	21.1333	9.96667	21.1333	9.96667	759	123	9	68.5247	344	33	344	33
C620GW	2021-12-03	Southern South America	Argentina	-31.067644	-64.129252	Crop	Zea_mays_-Corn-	Tropical_dry_forest	Tropical	Yes	Yes	Chemical	15.85	13.4667	52.3995	446.099	28.1	2.4	25.7	21.2833	10.1333	21.2833	10.1333	773	127	10	68.6691	352	34	352	34
C620GX	2021-12-03	Southern South America	Argentina	-31.093444	-64.141881	Crop	Zea_mays_-Corn-	Tropical_dry_forest	Tropical	Yes	Yes	Chemical	15.8458	13.4583	52.3671	445.306	28.1	2.4	25.7	21.25	10.1333	21.25	10.1333	777	129	10	68.7862	354	34	354	34
C6217U	2021-12-03	Southern South America	Argentina	-31.093332	-64.164545	Crop	Zea_mays_-Corn-	Tropical_dry_forest	Tropical	Yes	Yes	Chemical	15.6583	13.4833	52.261	444.976	28	2.2	25.8	21.0667	9.95	21.0667	9.95	771	127	10	68.4547	350	34	350	34
C6217V	2021-12-03	Southern South America	Argentina	-31.173232	-64.187247	Crop	Zea_mays_-Corn-	Tropical_dry_forest	Tropical	Yes	Yes	Chemical	15.9125	13.475	52.2287	446.802	28.2	2.4	25.8	21.3167	10.1833	21.3167	10.1833	791	134	10	69.6851	363	34	363	34
C6217W	2021-12-03	Southern South America	Argentina	-31.121038	-64.249686	Crop	Zea_mays_-Corn-	Tropical_dry_forest	Tropical	Yes	Yes	Chemical	15.2083	13.0167	51.6534	442.605	27.3	2.1	25.2	20.6667	9.56667	20.6667	9.56667	755	121	10	67.7496	340	34	340	34
C6217X	2021-12-03	Southern South America	Argentina	-31.123496	-64.225967	Crop	Zea_mays_-Corn-	Tropical_dry_forest	Tropical	Yes	Yes	Chemical	15.3583	13.2	51.9685	443.446	27.5	2.1	25.4	20.8	9.7	20.8	9.7	762	123	10	67.9876	344	35	344	35
C6217Y	2021-12-03	Southern South America	Argentina	-31.097951	-64.252124	Crop	Zea_mays_-Corn-	Tropical_dry_forest	Tropical	Yes	Yes	Chemical	15.0125	12.975	51.6932	440.512	27.1	2	25.1	20.4667	9.41667	20.4667	9.41667	744	116	10	67.2209	333	35	333	35
C62180	2021-12-03	Southern South America	Argentina	-31.018542	-64.214105	Crop	Zea_mays_-Corn-	Tropical_dry_forest	Tropical	Yes	Yes	Chemical	15.175	13.45	52.5391	443.691	27.4	1.8	25.6	20.65	9.51667	20.65	9.51667	739	114	9	66.748	328	34	328	34
C62182	2021-12-03	Southern South America	Argentina	-30.93598	-64.268313	Crop	Zea_mays_-Corn-	Tropical_dry_forest	Tropical	Yes	Yes	Chemical	14.6833	12.95	51.5936	438.978	26.8	1.7	25.1	20.15	9.11667	20.15	9.11667	703	108	9	66.56	312	33	312	33
C620GS	2021-12-03	Southern South America	Argentina	-31.177374	-64.23076	Crop	Glycine_max_-Soybean-	Tropical_dry_forest	Tropical	Yes	Yes	Chemical	15.6417	13.15	52.1825	444.286	27.6	2.4	25.2	21.0333	9.95	21.0333	9.95	780	130	10	69.5981	357	32	357	32
C620GV	2021-12-03	Southern South America	Argentina	-31.041418	-64.151924	Crop	Glycine_max_-Soybean-	Tropical_dry_forest	Tropical	Yes	Yes	Chemical	15.5917	13.4833	52.6693	443.528	27.8	2.2	25.6	21.0333	9.93333	21.0333	9.93333	755	121	9	67.812	340	34	340	34
C620JA	2021-05-01	Australia	Australia	-42.709888	147.450182	Crop	Prunus_cerasus_-Cherry-	Southern_temperate_forest	Southern	Yes	Yes	Chemical	12.475	10.7833	52.6016	352.965	23.4	2.9	20.5	14	10.4333	16.7833	8.05	537	59	35	17.0875	161	112	144	132
C620JC	2021-05-01	Australia	Australia	-42.709888	147.450182	Crop	Prunus_cerasus_-Cherry-	Southern_temperate_forest	Southern	Yes	Yes	Chemical	12.475	10.7833	52.6016	352.965	23.4	2.9	20.5	14	10.4333	16.7833	8.05	537	59	35	17.0875	161	112	144	132
C620JB	2021-05-01	Australia	Australia	-42.709888	147.450182	Crop	Paeonia_broteri_-Peonies-	Southern_temperate_forest	Southern	Yes	Yes	Chemical	12.475	10.7833	52.6016	352.965	23.4	2.9	20.5	14	10.4333	16.7833	8.05	537	59	35	17.0875	161	112	144	132
C620JD	2021-05-01	Australia	Australia	-42.709888	147.450182	Natural	Pasture	Southern_temperate_forest	Southern	No	No	No_data	12.475	10.7833	52.6016	352.965	23.4	2.9	20.5	14	10.4333	16.7833	8.05	537	59	35	17.0875	161	112	144	132
C620JE	2021-05-01	Australia	Australia	-42.709888	147.450182	Natural	Pasture	Southern_temperate_forest	Southern	No	No	No_data	12.475	10.7833	52.6016	352.965	23.4	2.9	20.5	14	10.4333	16.7833	8.05	537	59	35	17.0875	161	112	144	132
C620J6	2021-05-01	Australia	Australia	-42.737864	147.478838	Crop	Vitis_vinifera_-Vine-	Southern_temperate_forest	Southern	Yes	Yes	Chemical	11.9417	10.5333	52.4046	349.505	22.8	2.7	20.1	13.4167	9.96667	16.2	7.56667	646	67	42	16.3642	190	136	168	166
C620J7	2021-05-01	Australia	Australia	-42.737864	147.478838	Crop	Vitis_vinifera_-Vine-	Southern_temperate_forest	Southern	Yes	Yes	Chemical	11.9417	10.5333	52.4046	349.505	22.8	2.7	20.1	13.4167	9.96667	16.2	7.56667	646	67	42	16.3642	190	136	168	166
C620J8	2021-05-01	Australia	Australia	-42.737864	147.478838	Crop	Vitis_vinifera_-Vine-	Southern_temperate_forest	Southern	Yes	Yes	Chemical	11.9417	10.5333	52.4046	349.505	22.8	2.7	20.1	13.4167	9.96667	16.2	7.56667	646	67	42	16.3642	190	136	168	166
C620J9	2021-05-01	Australia	Australia	-42.737864	147.478838	Crop	Vitis_vinifera_-Vine-	Southern_temperate_forest	Southern	Yes	Yes	Chemical	11.9417	10.5333	52.4046	349.505	22.8	2.7	20.1	13.4167	9.96667	16.2	7.56667	646	67	42	16.3642	190	136	168	166
C620OV	2021-09-11	Europe	Belgium	50.8617911	3.9052290	Crop	Triticum_aestivum_-Wheat-	Temperate_deciduous_forest	Temperate	No	Yes	Organic	10.0958	7.40833	33.5219	550.675	22.6	0.5	22.1	7.1	6.1	16.95	3.53333	804	80	50	13.7668	232	171	205	194
C620OX	2021-09-11	Europe	Belgium	50.8605864	3.9047333	Crop	Triticum_spelta_-Spelt-	Temperate_deciduous_forest	Temperate	No	Yes	Organic	10.0958	7.40833	33.5219	550.675	22.6	0.5	22.1	7.1	6.1	16.95	3.53333	804	80	50	13.7668	232	171	205	194
C620O8	2021-09-11	Europe	Belgium	51.1206771	3.8743016	Crop	Zea_mays_-Corn-	Temperate_deciduous_forest	Temperate	No	Yes	Organic	10.4375	7.125	32.6835	547.25	22.6	0.8	21.8	7.53333	6.4	17.2333	3.9	775	77	47	15.7316	228	156	202	183
C620OF	2021-09-11	Europe	Belgium	51.0979727	3.7894651	Crop	Zea_mays_-Corn-	Temperate_deciduous_forest	Temperate	No_data	Yes	Chemical	10.6667	7.3	32.7354	560.691	23.2	0.9	22.3	7.61667	6.56667	17.6833	4.01667	785	79	48	15.966	231	158	203	186
C620OH	2021-09-11	Europe	Belgium	51.0967547	3.7853644	Crop	Zea_mays_-Corn-	Temperate_deciduous_forest	Temperate	No_data	Yes	Chemical	10.6667	7.3	32.7354	560.691	23.2	0.9	22.3	7.61667	6.56667	17.6833	4.01667	785	79	48	15.966	231	158	203	186
C620OR	2021-09-11	Europe	Belgium	51.0987147	3.7890869	Crop	Zea_mays_-Corn-	Temperate_deciduous_forest	Temperate	No_data	Yes	Chemical	10.6667	7.3	32.7354	560.691	23.2	0.9	22.3	7.61667	6.56667	17.6833	4.01667	785	79	48	15.966	231	158	203	186
C620OQ	2021-09-11	Europe	Belgium	51.1218463	3.8729303	Crop	Malus_domestica_-Apple-	Temperate_deciduous_forest	Temperate	No	Yes	Organic	10.4375	7.125	32.6835	547.25	22.6	0.8	21.8	7.53333	6.4	17.2333	3.9	775	77	47	15.7316	228	156	202	183
C620ON	2021-09-11	Europe	Belgium	51.1075529	3.2342792	Crop	Phaseolus_vulgaris_-Bean-	Temperate_deciduous_forest	Temperate	No	Yes	Organic	10.1625	7.05833	33.4518	523.477	22	0.9	21.1	7.5	6.18333	16.65	3.96667	793	87	47	18.4602	245	152	200	187
C620O7	2021-09-11	Europe	Belgium	51.1081891	3.7942533	Crop	Allium_ampeloprasum_-Leek-	Temperate_deciduous_forest	Temperate	Yes	Yes	Chemical	10.6292	7.25833	32.6952	556.799	23.1	0.9	22.2	7.61667	6.55	17.5833	4.01667	785	79	48	15.8234	231	159	203	186
C620OL	2021-09-11	Europe	Belgium	51.1213554	3.8735664	Crop	Allium_ampeloprasum_-Leek-	Temperate_deciduous_forest	Temperate	No	Yes	Organic	10.4375	7.125	32.6835	547.25	22.6	0.8	21.8	7.53333	6.4	17.2333	3.9	775	77	47	15.7316	228	156	202	183
C620OG	2021-09-11	Europe	Belgium	51.1215061	3.8736565	Crop	Allium_cepa_-Onion-	Temperate_deciduous_forest	Temperate	No	Yes	Organic	10.4375	7.125	32.6835	547.25	22.6	0.8	21.8	7.53333	6.4	17.2333	3.9	775	77	47	15.7316	228	156	202	183
C620OZ	2021-09-11	Europe	Belgium	51.1079132	3.7931742	Crop	Asparagus_officinalis	Temperate_deciduous_forest	Temperate	Yes	Yes	Chemical	10.6292	7.25833	32.6952	556.799	23.1	0.9	22.2	7.61667	6.55	17.5833	4.01667	785	79	48	15.8234	231	159	203	186
C620OP	2021-09-11	Europe	Belgium	51.0990043	3.7882315	Crop	Beta_vulgaris_-Beet-	Temperate_deciduous_forest	Temperate	No_data	Yes	Chemical	10.6667	7.3	32.7354	560.691	23.2	0.9	22.3	7.61667	6.56667	17.6833	4.01667	785	79	48	15.966	231	158	203	186
C620OS	2021-09-11	Europe	Belgium	50.8607746	3.9051152	Crop	Beta_vulgaris_-Beet-	Temperate_deciduous_forest	Temperate	No	Yes	Organic	10.0958	7.40833	33.5219	550.675	22.6	0.5	22.1	7.1	6.1	16.95	3.53333	804	80	50	13.7668	232	171	205	194
C620OA	2021-09-11	Europe	Belgium	51.1214126	3.8738958	Crop	Brassica_oleracea_-Broccoli-	Temperate_deciduous_forest	Temperate	No	Yes	Organic	10.4375	7.125	32.6835	547.25	22.6	0.8	21.8	7.53333	6.4	17.2333	3.9	775	77	47	15.7316	228	156	202	183
C620OM	2021-09-11	Europe	Belgium	51.1081830	3.7924223	Crop	Brassica_oleracea_-Broccoli-	Temperate_deciduous_forest	Temperate	Yes	Yes	Chemical	10.6292	7.25833	32.6952	556.799	23.1	0.9	22.2	7.61667	6.55	17.5833	4.01667	785	79	48	15.8234	231	159	203	186
C620OI	2021-09-11	Europe	Belgium	50.8622905	3.9046529	Crop	Brassica_oleracea_-Cabbage-	Temperate_deciduous_forest	Temperate	No	Yes	Organic	10.0958	7.40833	33.5219	550.675	22.6	0.5	22.1	7.1	6.1	16.95	3.53333	804	80	50	13.7668	232	171	205	194
C620OY	2021-09-11	Europe	Belgium	51.1081000	3.7924886	Crop	Brassica_oleracea_-Cabbage-	Temperate_deciduous_forest	Temperate	Yes	Yes	Chemical	10.6292	7.25833	32.6952	556.799	23.1	0.9	22.2	7.61667	6.55	17.5833	4.01667	785	79	48	15.8234	231	159	203	186
C620OW	2021-09-11	Europe	Belgium	50.8620180	3.9047194	Crop	Brassica_oleracea_-Kale-	Temperate_deciduous_forest	Temperate	No	Yes	Organic	10.0958	7.40833	33.5219	550.675	22.6	0.5	22.1	7.1	6.1	16.95	3.53333	804	80	50	13.7668	232	171	205	194
C620O9	2021-09-11	Europe	Belgium	51.1014443	3.7910312	Crop	Cichorium_endivia_-Endive-	Temperate_deciduous_forest	Temperate	Yes	Yes	Chemical	10.6625	7.225	32.6923	556.818	23.1	1	22.1	7.65	6.58333	17.6333	4.06667	785	79	48	15.7973	231	158	204	186
C620O6	2021-09-11	Europe	Belgium	50.8606323	3.9048420	Crop	Cucurbita_pepo_-Zucchini-	Temperate_deciduous_forest	Temperate	No	Yes	Organic	10.0958	7.40833	33.5219	550.675	22.6	0.5	22.1	7.1	6.1	16.95	3.53333	804	80	50	13.7668	232	171	205	194
C620OO	2021-09-11	Europe	Belgium	50.8608453	3.9048851	Crop	Cucurbita_sp._-Pumpkin-	Temperate_deciduous_forest	Temperate	No	Yes	Organic	10.0958	7.40833	33.5219	550.675	22.6	0.5	22.1	7.1	6.1	16.95	3.53333	804	80	50	13.7668	232	171	205	194
C620OJ	2021-09-11	Europe	Belgium	51.1080646	3.7925530	Crop	Daucus_carota_-Carrot-	Temperate_deciduous_forest	Temperate	Yes	Yes	Chemical	10.6292	7.25833	32.6952	556.799	23.1	0.9	22.2	7.61667	6.55	17.5833	4.01667	785	79	48	15.8234	231	159	203	186
C620OC	2021-09-11	Europe	Belgium	51.1204321	3.8742903	Crop	Foeniculum_vulgare_-Fennel-	Temperate_deciduous_forest	Temperate	No	Yes	Organic	10.4375	7.125	32.6835	547.25	22.6	0.8	21.8	7.53333	6.4	17.2333	3.9	775	77	47	15.7316	228	156	202	183
C620OT	2021-09-11	Europe	Belgium	50.8608479	3.9054303	Crop	Helianthus_tuberosus_-Jerusalem_artichoke-	Temperate_deciduous_forest	Temperate	No	Yes	Organic	10.0958	7.40833	33.5219	550.675	22.6	0.5	22.1	7.1	6.1	16.95	3.53333	804	80	50	13.7668	232	171	205	194
C620OB	2021-09-11	Europe	Belgium	50.8603679	3.9051853	Crop	Petroselinum_crispum_-Parsley-	Temperate_deciduous_forest	Temperate	No	Yes	Organic	10.0958	7.40833	33.5219	550.675	22.6	0.5	22.1	7.1	6.1	16.95	3.53333	804	80	50	13.7668	232	171	205	194
C620OD	2021-09-11	Europe	Belgium	51.1208686	3.8742370	Crop	Solanum_lycopersicum_-Tomato-	Temperate_deciduous_forest	Temperate	No	Yes	Organic	10.4375	7.125	32.6835	547.25	22.6	0.8	21.8	7.53333	6.4	17.2333	3.9	775	77	47	15.7316	228	156	202	183
C620OU	2021-09-11	Europe	Belgium	51.1057744	3.7920822	Crop	Solanum_tuberosum_-Potato-	Temperate_deciduous_forest	Temperate	Yes	Yes	Chemical	10.6292	7.25833	32.6952	556.799	23.1	0.9	22.2	7.61667	6.55	17.5833	4.01667	785	79	48	15.8234	231	159	203	186
C620OE	2021-09-11	Europe	Belgium	50.8602721	3.9046998	Crop	Other_ornamental	Temperate_deciduous_forest	Temperate	No	Yes	Organic	10.0958	7.40833	33.5219	550.675	22.6	0.5	22.1	7.1	6.1	16.95	3.53333	804	80	50	13.7668	232	171	205	194
C620OK	2021-09-12	Europe	Belgium	51.2173872	3.2633718	Crop	Other_ornamental	Temperate_deciduous_forest	Temperate	No	No	No_data	10.3042	6.79167	32.6522	520.993	21.9	1.1	20.8	7.76667	6.28333	16.75	4.13333	792	86	46	18.804	245	150	202	186
C620FU	2021-08-14	No data	Benin	9.401240000	2.679130000	Crop	Zea_mays_-Corn-	Tropical_savannas	Tropical	Yes	Yes	Chemical	26.5833	11.8167	64.9267	167.662	36.3	18.1	18.2	24.65	26.3333	28.95	24.65	1092	202	2	88.7137	592	9	116	592
C620FZ	2021-08-14	No data	Benin	9.407800000	2.685240000	Crop	Zea_mays_-Corn-	Tropical_savannas	Tropical	No_data	Yes	Chemical	26.6417	11.8167	64.5719	166.39	36.4	18.1	18.3	24.7	26.4	28.9833	24.7	1087	201	2	88.8011	589	9	115	589
C620G3	2021-08-14	No data	Benin	9.372700000	2.664360000	Crop	Zea_mays_-Corn-	Tropical_savannas	Tropical	Yes	Yes	Chemical	26.6375	11.775	64.6978	169.05	36.4	18.2	18.2	24.6667	26.4167	29.0167	24.6667	1096	201	2	88.1656	590	9	118	590
C620FV	2021-08-14	No data	Benin	9.416390000	2.199260000	Crop	Glycine_max_-Soybean-	Tropical_savannas	Tropical	No_data	Yes	Chemical	26.7167	11.35	64.4886	166.41	36.2	18.6	17.6	24.7833	26.4333	29.05	24.7833	1079	224	1	92.507	616	7	114	616
C620FW	2021-08-14	No data	Benin	9.421000000	2.703020000	Crop	Glycine_max_-Soybean-	Tropical_savannas	Tropical	No_data	Yes	Chemical	26.6083	11.7833	64.0398	166.581	36.4	18	18.4	24.6833	26.35	28.9667	24.6833	1084	201	2	89.1138	589	9	113	589
C620FX	2021-08-14	No data	Benin	9.419660000	2.270778000	Crop	Glycine_max_-Soybean-	Tropical_savannas	Tropical	No_data	Yes	Chemical	26.6208	11.2417	63.8731	168.273	36.1	18.5	17.6	24.6667	26.3667	29	24.6667	1068	221	1	93.1263	612	7	107	612
C620G2	2021-08-14	No data	Benin	9.368020000	2.663510000	Crop	Glycine_max_-Soybean-	Tropical_savannas	Tropical	No_data	Yes	Chemical	26.6375	11.775	64.6978	169.05	36.4	18.2	18.2	24.6667	26.4167	29.0167	24.6667	1096	201	2	88.1656	590	9	118	590
C620FY	2021-08-14	No data	Benin	9.400120000	2.679490000	Crop	Gossypium_barbadense_-Cotton-	Tropical_savannas	Tropical	Yes	Yes	Chemical	26.5833	11.8167	64.9267	167.662	36.3	18.1	18.2	24.65	26.3333	28.95	24.65	1092	202	2	88.7137	592	9	116	592
C620G0	2021-08-14	No data	Benin	9.100100000	2.267823000	Crop	Gossypium_barbadense_-Cotton-	Tropical_savannas	Tropical	Yes	Yes	Chemical	26.8917	11.2167	64.4636	160.494	36.3	18.9	17.4	25	26.7	29.15	25	1054	201	2	86.8244	572	12	122	572
C620G1	2021-08-14	No data	Benin	9.317050000	2.666240000	Crop	Gossypium_barbadense_-Cotton-	Tropical_savannas	Tropical	Yes	Yes	Chemical	26.8125	11.9083	64.7192	165.339	36.7	18.3	18.4	24.9	26.5833	29.15	24.9	1108	198	3	86.4216	587	11	126	587
C620IP	2021-10-11	Southern South America	Brazil	-7.959055556	-35.106361111	Crop	Artocarpus_heterophyllus_-Jackfruit-	Tropical_moist_forest	Tropical	No	No	No_data	24.6292	8.35833	72.0546	114.702	30.5	18.9	11.6	23.6333	25.1333	25.8333	23.0833	1316	223	24	64.2108	603	89	280	530
C620IM	2021-10-11	Southern South America	Brazil	-7.974166667	-35.090638889	Crop	Citrus_spp._-Citron-	Tropical_moist_forest	Tropical	No	No	No_data	24.7792	8.325	72.3913	112.219	30.6	19.1	11.5	23.7833	25.2833	25.9667	23.2667	1337	226	24	64.3181	611	88	286	536
C620IR	2021-10-11	Southern South America	Brazil	-7.959527778	-35.106000000	Crop	Citrus_spp._-Citron-	Tropical_moist_forest	Tropical	No	No	No_data	24.6292	8.35833	72.0546	114.702	30.5	18.9	11.6	23.6333	25.1333	25.8333	23.0833	1316	223	24	64.2108	603	89	280	530
C620IO	2021-10-11	Southern South America	Brazil	-7.958194444	-35.107555556	Crop	Mangifera_indica_-Mango-	Tropical_moist_forest	Tropical	No	No	No_data	24.4958	8.39167	72.971	114.425	30.3	18.8	11.5	23.4833	25.0167	25.7	22.9667	1317	225	24	64.633	606	87	277	535
C620IS	2021-10-11	Southern South America	Brazil	-7.959972222	-35.105527778	Crop	Phaseolus_vulgaris_-Bean-	Tropical_moist_forest	Tropical	No	No	No_data	24.6292	8.35833	72.0546	114.702	30.5	18.9	11.6	23.6333	25.1333	25.8333	23.0833	1316	223	24	64.2108	603	89	280	530
C620IN	2021-10-11	Southern South America	Brazil	-7.974472222	-35.090916667	Crop	Manihot_esculenta_-Cassava-	Tropical_moist_forest	Tropical	No	No	No_data	24.7792	8.325	72.3913	112.219	30.6	19.1	11.5	23.7833	25.2833	25.9667	23.2667	1337	226	24	64.3181	611	88	286	536
C620IQ	2021-10-11	Southern South America	Brazil	-7.958500000	-35.108277778	Crop	Manihot_esculenta_-Cassava-	Tropical_moist_forest	Tropical	Yes	No	No_data	24.6292	8.35833	72.0546	114.702	30.5	18.9	11.6	23.6333	25.1333	25.8333	23.0833	1316	223	24	64.2108	603	89	280	530
C6217N	2021-10-16	Southern South America	Brazil	-7.917666667	-38.048166667	Crop	Zea_mays_-Corn-	Tropical_savannas	Tropical	No	No	No_data	23.5708	9.825	67.7586	176.229	30.9	16.4	14.5	24.7167	22.7	25.2833	21.05	719	160	7	87.5765	415	25	154	73
C6217Q	2021-10-16	Southern South America	Brazil	-7.914444444	-38.050333333	Natural	Amburana_cearensis_-Caatinga-	Tropical_savannas	Tropical	No	No	No_data	23.5167	9.83333	67.3516	177.819	30.9	16.3	14.6	24.6833	22.6167	25.25	20.9833	729	161	8	86.6197	418	27	155	77
C6217P	2021-10-16	Southern South America	Brazil	-7.917888889	-38.048611111	Crop	Cocos_nucifera_-Coconut-	Tropical_savannas	Tropical	No	No	No_data	23.5708	9.825	67.7586	176.229	30.9	16.4	14.5	24.7167	22.7	25.2833	21.05	719	160	7	87.5765	415	25	154	73
C6217O	2021-10-16	Southern South America	Brazil	-7.918388889	-38.048194444	Crop	Eugenia_uniflora_-Brazilian_cherry-	Tropical_savannas	Tropical	No	No	No_data	23.5708	9.825	67.7586	176.229	30.9	16.4	14.5	24.7167	22.7	25.2833	21.05	719	160	7	87.5765	415	25	154	73
C620IV	2021-10-19	Southern South America	Brazil	-8.685666667	-35.133555556	Crop	Annona_muricata_-Soursop-	Tropical_moist_forest	Tropical	No	No	No_data	24.2167	6.31667	68.6594	104.931	28.6	19.4	9.2	23.3833	24.6167	25.35	22.8333	1908	288	38	60.709	851	144	402	546
C620IU	2021-10-19	Southern South America	Brazil	-8.685138889	-35.133444444	Crop	Artocarpus_heterophyllus_-Jackfruit-	Tropical_moist_forest	Tropical	No	No	No_data	24.2167	6.31667	68.6594	104.931	28.6	19.4	9.2	23.3833	24.6167	25.35	22.8333	1908	288	38	60.709	851	144	402	546
C620IT	2021-10-19	Southern South America	Brazil	-8.682055556	-35.133222222	Crop	Saccharum_officinarum_-Sugarcane-	Tropical_moist_forest	Tropical	Yes	Yes	Chemical	24.3458	6.29167	69.1392	103.78	28.7	19.6	9.1	23.5333	24.75	25.45	22.95	1865	287	36	61.1328	834	139	395	524
C6217M	2021-10-19	Southern South America	Brazil	-8.694333333	-35.141666667	Crop	Carex_spp._-Sedge-	Tropical_moist_forest	Tropical	No	No	No_data	24.1417	6.33333	68.1003	105.869	28.6	19.3	9.3	23.3167	24.55	25.2667	22.7333	1914	288	39	60.3491	852	148	403	549
C620CS	2021-04-15	Europe	Bulgaria	43.30143	27.00316	Crop	Triticum_aestivum_-Wheat-	Mediterranean_forest	Mediterranean	Yes	Yes	Chemical	11.0542	10.775	33.7774	793.509	27.6	-4.3	31.9	18.8167	2.18333	20.5333	1.08333	564	66	36	18.9697	177	112	160	122
C620DJ	2021-04-15	Europe	Bulgaria	43.24950	27.42763	Crop	Triticum_aestivum_-Wheat-	Mediterranean_forest	Mediterranean	Yes	Yes	Chemical	11.5	10.0667	32.4731	786.164	27.9	-3.1	31	15.3167	2.76667	21.0833	1.83333	530	58	35	14.7114	154	109	142	117
C620D1	2021-04-15	Europe	Bulgaria	43.18583	27.47491	Crop	Triticum_aestivum_-Wheat-	Mediterranean_forest	Mediterranean	Yes	Yes	Chemical	10.9417	9.36667	31.4318	766.912	26.8	-3	29.8	14.5667	2.35	20.3333	1.58333	535	59	37	14.5657	156	114	142	121
C620DD	2021-04-15	Europe	Bulgaria	43.23570	27.43198	Crop	Sinapis_alba_-Mustard-	Mediterranean_forest	Mediterranean	Yes	Yes	Chemical	11.6167	10.0333	32.4703	786.957	28	-2.9	30.9	15.4667	2.88333	21.2333	1.95	529	58	35	14.9682	155	109	140	116
C620CT	2021-04-16	Europe	Bulgaria	43.85574	27.92338	Crop	Lavandula_spp._-Lavender-	Mediterranean_forest	Mediterranean	Yes	Yes	Chemical	10.9833	9.06667	29.6296	830.732	27.3	-3.3	30.6	15.3333	2.03333	21.1333	0.683333	485	55	30	16.9001	143	97	137	99
C620DF	2021-04-16	Europe	Bulgaria	43.73687	28.00205	Crop	Lavandula_spp._-Lavender-	Mediterranean_forest	Mediterranean	Yes	Yes	Chemical	10.9333	8.93333	29.7778	812.637	26.9	-3.1	30	15.05	2.1	20.9	0.933333	491	56	32	16.3225	143	100	136	104
C620DI	2021-04-16	Europe	Bulgaria	43.45378	27.82609	Crop	Lavandula_spp._-Lavender-	Mediterranean_forest	Mediterranean	Yes	No	No_data	10.4875	8.99167	30.6883	782.401	26.1	-3.2	29.3	14.25	1.81667	20.0833	0.916667	518	58	36	15.442	151	108	140	116
C620CY	2021-04-16	Europe	Bulgaria	43.85850	27.95880	Crop	Zea_mays_-Corn-	Mediterranean_forest	Mediterranean	No	No	No_data	11.2125	9.04167	29.3561	832.431	27.7	-3.1	30.8	19.4167	2.25	21.45	0.933333	479	55	30	17.043	141	96	136	97
C620CZ	2021-04-16	Europe	Bulgaria	43.98424	27.90910	Crop	Zea_mays_-Corn-	Mediterranean_forest	Mediterranean	Yes	Yes	Chemical	11.2333	8.93333	28.6325	846.021	27.9	-3.3	31.2	15.75	2.23333	21.5833	0.7	474	54	28	17.9138	140	92	135	93
C620D3	2021-04-16	Europe	Bulgaria	43.63737	27.91006	Crop	Mediago_sativa_-Alfalfa-	Mediterranean_forest	Mediterranean	Yes	No	No_data	10.7958	9.19167	30.5371	807.925	26.8	-3.3	30.1	14.8333	1.95	20.7	0.85	500	55	33	14.868	142	103	137	107
C620D5	2021-04-16	Europe	Bulgaria	43.85660	27.96300	Crop	Sinapis_alba_-Mustard-	Mediterranean_forest	Mediterranean	Yes	Yes	Chemical	11.1708	9.04167	29.4517	829.103	27.6	-3.1	30.7	15.4667	2.25	21.35	0.933333	481	55	30	17.0056	141	96	135	97
C620DC	2021-04-17	Europe	Bulgaria	43.17657	27.76712	Crop	Dactylis_glomerata_-Orchard_grass-	Mediterranean_forest	Mediterranean	Yes	No	No_data	11.8708	8.89167	30.6609	762.941	27.4	-1.6	29	8.11667	3.35	21.3333	2.71667	506	53	35	13.502	140	110	127	119
C620CW	2021-04-17	Europe	Bulgaria	43.21905	27.65666	Crop	Triticum_aestivum_-Wheat-	Mediterranean_forest	Mediterranean	No	No	No_data	11.3792	9.25833	31.3842	767.906	27.1	-2.4	29.5	14.9333	2.83333	20.85	2.06667	524	56	37	13.478	149	113	135	120
C620D8	2021-04-17	Europe	Bulgaria	43.17678	27.76678	Crop	Vitis_vinifera_-Vine-	Mediterranean_forest	Mediterranean	Yes	No	No_data	11.8708	8.89167	30.6609	762.941	27.4	-1.6	29	8.11667	3.35	21.3333	2.71667	506	53	35	13.502	140	110	127	119
C620DG	2021-04-17	Europe	Bulgaria	43.22883	27.71476	Crop	Vitis_vinifera_-Vine-	Mediterranean_forest	Mediterranean	Yes	No	No_data	11.5333	9.53333	31.9911	769.608	27.4	-2.4	29.8	15.0667	2.96667	21.05	2.23333	518	55	37	13.4412	146	111	134	119
C620DB	2021-04-18	Europe	Bulgaria	43.41474	28.10032	Crop	Lavandula_spp._-Lavender-	Mediterranean_forest	Mediterranean	Yes	Yes	Chemical	11.0667	8.21667	29.0342	764.099	26.1	-2.2	28.3	14.3833	2.56667	20.55	1.91667	506	54	36	13.7171	138	109	133	117
C620CV	2021-04-18	Europe	Bulgaria	43.44698	28.18529	Crop	Triticum_aestivum_-Wheat-	Mediterranean_forest	Mediterranean	Yes	Yes	Chemical	11.2333	8.58333	29.8032	775.609	26.5	-2.3	28.8	7.36667	2.63333	20.8333	1.9	503	53	36	13.4574	138	109	131	117
C620DL	2021-04-18	Europe	Bulgaria	43.41602	28.09928	Crop	Triticum_aestivum_-Wheat-	Mediterranean_forest	Mediterranean	Yes	Yes	Chemical	11.0625	8.325	29.3134	766.726	26.2	-2.2	28.4	14.4167	2.53333	20.5667	1.86667	506	54	36	13.5741	138	110	133	117
C620CX	2021-04-18	Europe	Bulgaria	43.42463	28.11589	Crop	Sinapis_alba_-Mustard-	Mediterranean_forest	Mediterranean	Yes	Yes	Chemical	11.0833	8.3	29.2254	766.623	26.2	-2.2	28.4	14.4333	2.56667	20.6	1.88333	506	53	36	13.2834	138	109	132	117
C620D2	2021-04-19	Europe	Bulgaria	43.54499	26.49888	Crop	Triticum_aestivum_-Wheat-	Mediterranean_forest	Mediterranean	Yes	Yes	Chemical	11.375	10.2667	31.5897	838.49	28.4	-4.1	32.5	19.7	2.28333	21.55	0.8	587	74	35	25.0866	201	108	183	114
C620D9	2021-04-19	Europe	Bulgaria	43.64833	26.18432	Crop	Zea_mays_-Corn-	Mediterranean_forest	Mediterranean	Yes	Yes	Chemical	11.2125	10.275	31.422	854.927	28.3	-4.4	32.7	19.7167	2.05	21.55	0.383333	584	72	34	24.6493	200	108	183	113
C620DH	2021-04-19	Europe	Bulgaria	43.42957	25.49782	Crop	Prunus_cerasus_-Cherry-	Mediterranean_forest	Mediterranean	Yes	No	No_data	12.0542	12.1083	33.8222	893.854	30.8	-5	35.8	20.95	2.66667	22.8167	0.666667	558	66	33	24.4609	193	107	174	108
C620D6	2021-04-19	Europe	Bulgaria	43.59830	26.27314	Crop	Prunus_domestica_-Plum-	Mediterranean_forest	Mediterranean	No	No	No_data	11.2417	10.2	31.3846	845.418	28.2	-4.3	32.5	19.6667	2.1	21.4833	0.55	590	74	34	25.1688	203	109	184	114
C620DK	2021-04-19	Europe	Bulgaria	43.57330	25.82227	Crop	Mediago_sativa_-Alfalfa-	Mediterranean_forest	Mediterranean	No	No	No_data	11.2	11.1833	32.5097	870.76	29.3	-5.1	34.4	19.8333	1.9	21.7167	0.166667	590	74	34	25.9461	206	109	189	112
C620D7	2021-04-19	Europe	Bulgaria	43.91801	26.07935	Crop	Vicia_sativa_-Vetch-	Mediterranean_forest	Mediterranean	No	No	No_data	11.6	10.3	30.6548	898.271	29.2	-4.4	33.6	20.5	2.11667	22.3167	0.183333	560	70	30	26.0394	194	100	178	103
C620DA	2021-04-19	Europe	Bulgaria	43.41993	25.25941	Crop	Juglans_regia_-Walnut-	Mediterranean_forest	Mediterranean	Yes	No	No_data	12.05	11.7667	33.2392	894.717	30.6	-4.8	35.4	20.95	0.7	22.8	0.7	553	65	34	24.443	191	106	174	106
C620CU	2021-04-19	Europe	Bulgaria	43.91801	26.07935	Crop	Fragaria_√ó_ananassa_-Strawberry-	Mediterranean_forest	Mediterranean	No	No	No_data	11.6	10.3	30.6548	898.271	29.2	-4.4	33.6	20.5	2.11667	22.3167	0.183333	560	70	30	26.0394	194	100	178	103
C620D0	2021-04-19	Europe	Bulgaria	43.38455	26.82139	Crop	Sinapis_alba_-Mustard-	Mediterranean_forest	Mediterranean	Yes	Yes	Chemical	10.4667	10.35	33.0671	793.824	26.8	-4.5	31.3	18.25	1.61667	20	0.5	581	70	36	21.5969	191	114	173	123
C620DE	2021-04-19	Europe	Bulgaria	43.91801	26.07935	Crop	Vitis_vinifera_-Vine-	Mediterranean_forest	Mediterranean	Yes	No	No_data	11.6	10.3	30.6548	898.271	29.2	-4.4	33.6	20.5	2.11667	22.3167	0.183333	560	70	30	26.0394	194	100	178	103
C620D4	2021-04-22	Europe	Bulgaria	42.13954	24.95932	Crop	Triticum_aestivum_-Wheat-	Mediterranean_forest	Mediterranean	No	No	No_data	12.2958	11.7417	34.8417	824.043	30.2	-3.5	33.7	16.9	18	22.3333	2.05	519	60	32	19.9849	161	101	133	125
C620G5	2021-06-25	Central Africa	Cameroon	5.482990000	10.557220000	Crop	Zea_mays_-Corn-	Tropical_savannas	Tropical	No	Yes	No_data	23.5	10.35	60.1744	136.947	32.5	15.3	17.2	22.25	23.9833	25.3333	22.25	1968	337	9	73.892	931	42	289	931
C620G8	2021-06-25	Central Africa	Cameroon	5.485410000	10.564020000	Crop	Zea_mays_-Corn-	Tropical_savannas	Tropical	Yes	Yes	No_data	23.4833	10.4667	60.1533	137.251	32.6	15.2	17.4	22.25	23.9667	25.3167	22.25	1975	339	9	73.7736	933	42	293	933
C620GB	2021-06-25	Central Africa	Cameroon	5.524270000	10.646700000	Crop	Coffea_arabica	Tropical_savannas	Tropical	No_data	No_data	No_data	22.8167	10.3333	58.0524	146.68	32	14.2	17.8	21.6	23.15	24.7667	21.6	1940	331	9	73.544	914	41	287	914
C620G6	2021-06-25	Central Africa	Cameroon	5.482680000	10.558340000	Crop	Citrus_spp._-Orange-	Tropical_savannas	Tropical	No	Yes	No_data	23.4792	10.375	60.3198	137.617	32.5	15.3	17.2	22.2333	23.95	25.3333	22.2333	1966	337	9	73.8829	930	42	289	930
C620G7	2021-06-25	Central Africa	Cameroon	5.483940000	10.560390000	Crop	Mangifera_indica_-Mango-	Tropical_savannas	Tropical	No	No	No_data	23.4833	10.4667	60.1533	137.251	32.6	15.2	17.4	22.25	23.9667	25.3167	22.25	1975	339	9	73.7736	933	42	293	933
C620G4	2021-06-25	Central Africa	Cameroon	5.485450000	10.556270000	Crop	Arachis_hypogaea_-Peanut-	Tropical_savannas	Tropical	No	No	No_data	23.5208	10.4417	60.3565	137.088	32.6	15.3	17.3	22.2667	24.0167	25.35	22.2667	1981	339	9	73.688	935	43	295	935
C620G9	2021-06-25	Central Africa	Cameroon	5.487580000	10.578810000	Crop	Arachis_hypogaea_-Peanut-	Tropical_savannas	Tropical	Yes	Yes	No_data	23.4	10.5	59.6591	139.349	32.6	15	17.6	22.1667	23.8833	25.2667	22.1667	1956	335	9	73.8439	925	41	288	925
C620GA	2021-06-25	Central Africa	Cameroon	5.497330000	10.613060000	Crop	Phaseolus_vulgaris_-Bean-	Tropical_savannas	Tropical	Yes	Yes	No_data	23.1875	10.425	58.8983	141.793	32.4	14.7	17.7	21.9833	23.6	25.0833	21.9833	1947	333	9	73.6835	919	41	288	919
C620GC	2021-06-25	Central Africa	Cameroon	5.530780000	10.650410000	Crop	Phaseolus_vulgaris_-Bean-	Tropical_savannas	Tropical	No	No_data	No_data	22.6875	10.2917	58.145	146.196	31.7	14	17.7	21.4833	22.9667	24.6167	21.4833	1937	331	9	73.475	913	41	288	913
C620GD	2021-06-25	Central Africa	Cameroon	5.583230000	10.683900000	Crop	Brassica_oleracea_-Cabbage-	Tropical_savannas	Tropical	Yes	Yes	No_data	22.3833	10.2667	57.6779	144.919	31.1	13.3	17.8	21.25	22.5	24.2167	21.25	1923	326	8	73.9086	913	38	284	913
C620HE	2021-06-01	North America	Canada	45.808856	-66.095926	Crop	Avena_sativa_-Oat-	Boreal_Forest	Boreal	No	Yes	Organic	5.72917	9.925	25.7792	1013.17	24.6	-13.9	38.5	-3.83333	17.8	17.8	-7.21667	1120	110	79	10.1511	317	257	257	286
C620HB	2021-06-01	North America	Canada	45.43961	-65.977483	Crop	Allium_sativum_-Garlic-	Boreal_Forest	Boreal	No	Yes	Organic	5.65833	9.6	26.158	967.076	23.3	-13.4	36.7	-3.45	17.0333	17.0333	-6.75	1242	129	65	18.6742	375	244	244	339
C620HC	2021-06-01	North America	Canada	45.43961	-65.977483	Crop	Beta_vulgaris_-Beet-	Boreal_Forest	Boreal	No	Yes	Organic	5.65833	9.6	26.158	967.076	23.3	-13.4	36.7	-3.45	17.0333	17.0333	-6.75	1242	129	65	18.6742	375	244	244	339
C620HH	2021-06-01	North America	Canada	45.808856	-66.095936	Crop	Beta_vulgaris_-Beet-	Boreal_Forest	Boreal	No	Yes	Organic	5.72917	9.925	25.7792	1013.17	24.6	-13.9	38.5	-3.83333	17.8	17.8	-7.21667	1120	110	79	10.1511	317	257	257	286
C620HD	2021-06-01	North America	Canada	45.808856	-66.095926	Crop	Cucurbita_maxima_-Squash-	Boreal_Forest	Boreal	No	No	No_data	5.72917	9.925	25.7792	1013.17	24.6	-13.9	38.5	-3.83333	17.8	17.8	-7.21667	1120	110	79	10.1511	317	257	257	286
C620HF	2021-06-01	North America	Canada	45.808856	-66.095926	Crop	Fagopyrum_esculentum_-Buckwheat-	Boreal_Forest	Boreal	No	Yes	Organic	5.72917	9.925	25.7792	1013.17	24.6	-13.9	38.5	-3.83333	17.8	17.8	-7.21667	1120	110	79	10.1511	317	257	257	286
C620HG	2021-06-01	North America	Canada	45.808856	-66.095926	Crop	Fagopyrum_esculentum_-Buckwheat-	Boreal_Forest	Boreal	No	Yes	Organic	5.72917	9.925	25.7792	1013.17	24.6	-13.9	38.5	-3.83333	17.8	17.8	-7.21667	1120	110	79	10.1511	317	257	257	286
C620H9	2021-06-01	North America	Canada	45.43961	-65.977483	Crop	Fragaria_√ó_ananassa_-Strawberry-	Boreal_Forest	Boreal	No	Yes	Organic	5.65833	9.6	26.158	967.076	23.3	-13.4	36.7	-3.45	17.0333	17.0333	-6.75	1242	129	65	18.6742	375	244	244	339
C620HA	2021-06-01	North America	Canada	45.43961	-65.977483	Crop	Solanum_lycopersicum_-Tomato-	Boreal_Forest	Boreal	No	Yes	Organic	5.65833	9.6	26.158	967.076	23.3	-13.4	36.7	-3.45	17.0333	17.0333	-6.75	1242	129	65	18.6742	375	244	244	339
C620H8	2021-06-01	North America	Canada	45.43961	-65.977483	Crop	Solanum_tuberosum_-Potato-	Boreal_Forest	Boreal	No	Yes	Organic	5.65833	9.6	26.158	967.076	23.3	-13.4	36.7	-3.45	17.0333	17.0333	-6.75	1242	129	65	18.6742	375	244	244	339
C620H3	2021-04-20	Southern South America	Colombia	5.6672778	-73.280222	Crop	Theobroma_cacao_	Tropical_moist_forest	Tropical	Yes	Yes	Organic	13.7917	11.3833	80.7329	47.5219	21	6.9	14.1	13.9	13.9833	14.3833	13.2167	1176	156	25	38.2143	437	145	308	329
C620H7	2021-04-20	Southern South America	Colombia	5.6672778	-73.280222	Crop	Ficus_elastica_-Rubber-	Tropical_moist_forest	Tropical	Yes	Yes	Organic	13.7917	11.3833	80.7329	47.5219	21	6.9	14.1	13.9	13.9833	14.3833	13.2167	1176	156	25	38.2143	437	145	308	329
C620GY	2021-06-05	Southern South America	Colombia	5.6672778	-73.280222	Crop	Oryza_sativa_-Rice-	Tropical_savannas	Tropical	Yes	Yes	Chemical	13.7917	11.3833	80.7329	47.5219	21	6.9	14.1	13.9	13.9833	14.3833	13.2167	1176	156	25	38.2143	437	145	308	329
C620H1	2021-06-05	Southern South America	Colombia	5.6672778	-73.280222	Natural	Pasture	Tropical_savannas	Tropical	No	No	No_data	13.7917	11.3833	80.7329	47.5219	21	6.9	14.1	13.9	13.9833	14.3833	13.2167	1176	156	25	38.2143	437	145	308	329
C620H0	2021-06-06	Southern South America	Colombia	5.6672778	-73.280222	Natural	Riparian_forest	Tropical_savannas	Tropical	No	No	No_data	13.7917	11.3833	80.7329	47.5219	21	6.9	14.1	13.9	13.9833	14.3833	13.2167	1176	156	25	38.2143	437	145	308	329
C620V6	2021-06-06	Southern South America	Colombia	5.6672778	-73.280222	Natural	No_data	Tropical_montane_forest	Tropical	No	No	No_data	13.7917	11.3833	80.7329	47.5219	21	6.9	14.1	13.9	13.9833	14.3833	13.2167	1176	156	25	38.2143	437	145	308	329
C620GZ	2021-06-06	Southern South America	Colombia	5.6672778	-73.280222	Crop	Elaeis_guineensis_-Palm_oil-	Tropical_savannas	Tropical	Yes	Yes	Chemical	13.7917	11.3833	80.7329	47.5219	21	6.9	14.1	13.9	13.9833	14.3833	13.2167	1176	156	25	38.2143	437	145	308	329
C620V5	2021-06-24	Southern South America	Colombia	5.6672778	-73.280222	Natural	Dry_forests	Tropical_dry_forest	Tropical	No	No	No_data	13.7917	11.3833	80.7329	47.5219	21	6.9	14.1	13.9	13.9833	14.3833	13.2167	1176	156	25	38.2143	437	145	308	329
C620H2	2021-06-26	Southern South America	Colombia	5.6672778	-73.280222	Crop	Solanum_tuberosum_-Potato-	Tropical_montane_forest	Tropical	Yes	Yes	Chemical	13.7917	11.3833	80.7329	47.5219	21	6.9	14.1	13.9	13.9833	14.3833	13.2167	1176	156	25	38.2143	437	145	308	329
C620H5	2021-08-01	Southern South America	Colombia	5.6672778	-73.280222	Crop	Persea_americana_-Avocado-	Tropical_montane_forest	Tropical	Yes	Yes	Chemical	13.7917	11.3833	80.7329	47.5219	21	6.9	14.1	13.9	13.9833	14.3833	13.2167	1176	156	25	38.2143	437	145	308	329
C620H6	2021-08-01	Southern South America	Colombia	5.6672778	-73.280222	Crop	Coffea_arabica	Tropical_montane_forest	Tropical	Yes	Yes	Chemical	13.7917	11.3833	80.7329	47.5219	21	6.9	14.1	13.9	13.9833	14.3833	13.2167	1176	156	25	38.2143	437	145	308	329
C620V7	2021-08-06	Southern South America	Colombia	5.6672778	-73.280222	Natural	White_sand_forests	Tropical_moist_forest	Tropical	No	No	No_data	13.7917	11.3833	80.7329	47.5219	21	6.9	14.1	13.9	13.9833	14.3833	13.2167	1176	156	25	38.2143	437	145	308	329
C620V4	2021-11-23	Southern South America	Colombia	5.6672778	-73.280222	Natural	White_sand_forests	Tropical_moist_forest	Tropical	No	No	No_data	13.7917	11.3833	80.7329	47.5219	21	6.9	14.1	13.9	13.9833	14.3833	13.2167	1176	156	25	38.2143	437	145	308	329
C620H4	2031-06-24	Southern South America	Colombia	5.6672778	-73.280222	Crop	Theobroma_cacao_	Tropical_dry_forest	Tropical	Yes	Yes	Chemical	13.7917	11.3833	80.7329	47.5219	21	6.9	14.1	13.9	13.9833	14.3833	13.2167	1176	156	25	38.2143	437	145	308	329
C620Q7	2021-08-13	Europe	Czech Republic	49.376132	13.056954	Crop	Avena_sativa_-Oat-	Temperate_deciduous_forest	Temperate	No	No_data	No_data	7.1875	8.80833	32.5031	698.043	22.1	-5	27.1	15.85	2.66667	15.85	-1.31667	831	104	49	23.2491	278	159	278	188
C620QP	2021-08-13	Europe	Czech Republic	49.390322	13.031205	Crop	Avena_sativa_-Oat-	Temperate_deciduous_forest	Temperate	Yes	No_data	No_data	7.3625	8.90833	32.7512	700.711	22.4	-4.8	27.2	16.0667	2.81667	16.0667	-1.18333	809	102	46	24.3899	274	151	274	180
C620QS	2021-08-13	Europe	Czech Republic	49.361872	13.092065	Crop	Avena_sativa_-Oat-	Temperate_deciduous_forest	Temperate	Yes	No_data	No_data	7.17917	8.925	32.9336	695.974	22.1	-5	27.1	15.8167	2.65	15.8167	-1.3	839	104	50	22.5974	279	162	279	191
C620QE	2021-08-13	Europe	Czech Republic	49.329008	13.677372	Crop	Solanum_tuberosum_-Potato-	Temperate_deciduous_forest	Temperate	Yes	No_data	No_data	7.775	9.35	33.3929	720.759	23.2	-4.8	28	16.6833	3.28333	16.6833	-1.08333	795	97	44	22.4183	261	151	261	184
C620QQ	2021-08-13	Europe	Czech Republic	49.291594	13.794179	Crop	Solanum_tuberosum_-Potato-	Temperate_deciduous_forest	Temperate	Yes	No_data	No_data	7.99583	9.375	33.2447	726.131	23.5	-4.7	28.2	16.95	3.55	16.95	-0.95	774	95	45	22.5276	256	148	256	176
C620QU	2021-08-13	Europe	Czech Republic	49.360546	13.084662	Crop	Solanum_tuberosum_-Potato-	Temperate_deciduous_forest	Temperate	Yes	No_data	No_data	7.075	8.9	32.8413	696.016	22	-5.1	27.1	15.7167	2.53333	15.7167	-1.4	851	106	50	22.6276	282	164	282	196
C620QD	2021-08-14	Europe	Czech Republic	49.360546	13.084662	Crop	Papaver_somniferum_-Poppy-	Temperate_deciduous_forest	Temperate	No	No_data	No_data	7.075	8.9	32.8413	696.016	22	-5.1	27.1	15.7167	2.53333	15.7167	-1.4	851	106	50	22.6276	282	164	282	196
C620QH	2021-08-14	Europe	Czech Republic	49.442755	12.946522	Crop	Papaver_somniferum_-Poppy-	Temperate_deciduous_forest	Temperate	No	No_data	No_data	7.4	9.06667	33.3333	698.911	22.5	-4.7	27.2	16.1	2.83333	16.1	-1.08333	781	100	46	25.2428	268	145	268	171
C620QJ	2021-08-14	Europe	Czech Republic	49.442755	12.946522	Crop	Papaver_somniferum_-Poppy-	Temperate_deciduous_forest	Temperate	No	No_data	No_data	7.4	9.06667	33.3333	698.911	22.5	-4.7	27.2	16.1	2.83333	16.1	-1.08333	781	100	46	25.2428	268	145	268	171
C620Q8	2021-08-15	Europe	Czech Republic	49.015994	14.388712	Crop	Triticum_aestivum_-Wheat-	Temperate_deciduous_forest	Temperate	Yes	No_data	No_data	8.57917	9.20833	32.4237	732.792	24.1	-4.3	28.4	17.6167	0.983333	17.6167	-0.466667	689	91	40	29.347	249	129	249	136
C620QC	2021-08-15	Europe	Czech Republic	49.017736	14.38805	Crop	Triticum_aestivum_-Wheat-	Temperate_deciduous_forest	Temperate	Yes	No_data	No_data	8.57083	9.19167	32.365	733.111	24.1	-4.3	28.4	17.6333	0.983333	17.6333	-0.466667	687	90	40	28.8858	247	129	247	136
C620QA	2021-08-15	Europe	Czech Republic	49.014267	14.39194	Crop	Triticum_aestivum_-Wheat-	Temperate_deciduous_forest	Temperate	Yes	No_data	No_data	8.59167	9.18333	32.3357	733.596	24.1	-4.3	28.4	17.65	1	17.65	-0.45	687	91	40	29.4734	249	129	249	136
C620Q5	2021-08-21	Europe	Czech Republic	48.956014	14.370557	Crop	Zea_mays_-Corn-	Temperate_deciduous_forest	Temperate	Yes	No_data	No_data	8.20833	9.21667	32.7995	721.727	23.6	-4.5	28.1	17.1167	0.7	17.1167	-0.666667	730	96	43	27.9507	260	140	260	148
C620QN	2021-08-21	Europe	Czech Republic	48.977856	14.434904	Crop	Zea_mays_-Corn-	Temperate_deciduous_forest	Temperate	Yes	No_data	No_data	8.56667	9.35	32.807	731.056	24.1	-4.4	28.5	17.6	0.983333	17.6	-0.433333	689	91	39	30.1441	251	127	251	133
C620QT	2021-08-21	Europe	Czech Republic	48.95676	14.354256	Crop	Zea_mays_-Corn-	Temperate_deciduous_forest	Temperate	Yes	No_data	No_data	8.23333	9.18333	32.6809	723.163	23.6	-4.5	28.1	17.1667	0.75	17.1667	-0.666667	732	95	43	27.2593	259	141	259	150
C620QM	2021-08-21	Europe	Czech Republic	49.022376	14.386453	Crop	Vaccinium_corymbosum_-Blueberry-	Temperate_deciduous_forest	Temperate	Yes	No_data	No_data	8.57083	9.19167	32.365	733.111	24.1	-4.3	28.4	17.6333	0.983333	17.6333	-0.466667	687	90	40	28.8858	247	129	247	136
C620QR	2021-08-21	Europe	Czech Republic	48.998776	14.149092	Crop	Vaccinium_corymbosum_-Blueberry-	Temperate_deciduous_forest	Temperate	Yes	No_data	No_data	7.55	8.76667	32.2304	710.774	22.4	-4.8	27.2	16.35	3.08333	16.35	-1.13333	848	104	54	22.4389	282	170	282	191
C620QV	2021-08-21	Europe	Czech Republic	49.002734	14.151458	Crop	Vaccinium_corymbosum_-Blueberry-	Temperate_deciduous_forest	Temperate	No	No_data	No_data	7.90417	8.875	32.2727	716.987	22.9	-4.6	27.5	16.75	3.5	16.75	-0.9	804	100	50	23.4708	271	158	271	177
C620Q9	2021-08-21	Europe	Czech Republic	48.999007	14.17139	Crop	Malus_domestica_-Apple-	Temperate_deciduous_forest	Temperate	Yes	No_data	No_data	7.825	8.78333	32.056	715.524	22.8	-4.6	27.4	16.6833	3.38333	16.6833	-0.933333	812	100	51	23.2789	273	160	273	179
C620QO	2021-08-21	Europe	Czech Republic	49.00268	14.174844	Crop	Malus_domestica_-Apple-	Temperate_deciduous_forest	Temperate	Yes	No_data	No_data	7.80417	8.85833	32.3297	715.813	22.8	-4.6	27.4	16.65	3.38333	16.65	-0.966667	808	100	50	23.5335	273	158	273	178
C620QX	2021-08-21	Europe	Czech Republic	49.013887	14.364082	Crop	Malus_domestica_-Apple-	Temperate_deciduous_forest	Temperate	Yes	No_data	No_data	8.5125	9.25833	32.5998	731.475	24.1	-4.3	28.4	17.55	0.933333	17.55	-0.483333	698	91	41	28.3716	250	133	250	140
C620Q4	2021-08-21	Europe	Czech Republic	48.994432	14.161442	Crop	Prunus_cerasus_-Cherry-	Temperate_deciduous_forest	Temperate	Yes	No_data	No_data	7.83333	8.8	32.1168	716.102	22.8	-4.6	27.4	16.7	3.4	16.7	-0.933333	812	100	51	23.2789	273	160	273	179
C620Q6	2021-08-21	Europe	Czech Republic	48.941832	14.358949	Crop	Prunus_cerasus_-Cherry-	Temperate_deciduous_forest	Temperate	Yes	No_data	No_data	8.0875	9.15833	32.7083	721.186	23.4	-4.6	28	17	3.61667	17	-0.783333	747	97	45	27.4184	265	144	265	154
C620QL	2021-08-21	Europe	Czech Republic	49.012175	14.148605	Crop	Prunus_cerasus_-Cherry-	Temperate_deciduous_forest	Temperate	Yes	No_data	No_data	7.77083	8.89167	32.3333	716.054	22.8	-4.7	27.5	16.6333	3.31667	16.6333	-1	817	100	52	22.6318	273	161	273	183
C620QB	2021-08-21	Europe	Czech Republic	48.983428	14.373164	Crop	Trifolium_sp._-Red_clover-	Temperate_deciduous_forest	Temperate	No	No_data	No_data	8.5	9.23333	32.6266	730.51	24	-4.3	28.3	17.5167	0.916667	17.5167	-0.5	699	91	41	28.6886	251	132	251	140
C620QF	2021-08-21	Europe	Czech Republic	48.975966	14.387829	Crop	Trifolium_sp._-Red_clover-	Temperate_deciduous_forest	Temperate	No	No_data	No_data	8.47083	9.20833	32.5383	728.724	23.9	-4.4	28.3	17.4667	0.9	17.4667	-0.516667	700	91	41	28.4149	251	133	251	140
C620QG	2021-08-21	Europe	Czech Republic	49.012425	14.415735	Crop	Cucurbita_sp._-Pumpkin-	Temperate_deciduous_forest	Temperate	No	No_data	No_data	8.60417	9.20833	32.3099	733.688	24.2	-4.3	28.5	17.65	1	17.65	-0.45	679	89	39	29.7625	247	127	247	133
C620QK	2021-08-21	Europe	Czech Republic	49.027411	14.400035	Crop	Cucurbita_sp._-Pumpkin-	Temperate_deciduous_forest	Temperate	No	No_data	No_data	8.60833	9.15	32.1053	735.372	24.2	-4.3	28.5	17.6833	0.983333	17.6833	-0.466667	679	89	39	29.1294	245	127	245	133
C620QW	2021-08-21	Europe	Czech Republic	49.030619	14.403087	Crop	Cucurbita_sp._-Pumpkin-	Temperate_deciduous_forest	Temperate	No	No_data	No_data	8.60833	9.15	32.1053	735.372	24.2	-4.3	28.5	17.6833	0.983333	17.6833	-0.466667	679	89	39	29.1294	245	127	245	133
C620ID	2021-06-11	Central America	Dominican Republic	19.46121	-70.812587	Crop	Zea_mays_-Corn-	Tropical_dry_forest	Tropical	No_data	No_data	No_data	25.675	11.5333	73.9316	152.919	33.4	17.8	15.6	26.2167	23.9833	27.35	23.6333	1146	160	54	35.461	363	196	224	226
C620IC	2021-06-11	Central America	Dominican Republic	19.495375	-70.809636	Crop	Musa_sp._-Banana-	Tropical_dry_forest	Tropical	No_data	No_data	No_data	25.9458	11.4917	74.1398	152.829	33.6	18.1	15.5	25.4667	27.5667	27.6	23.9167	1144	153	54	34.0548	372	201	219	242
C620IE	2021-06-11	Central America	Dominican Republic	19.48655	-70.80899	Crop	Papaya_-pawpaw-	Tropical_dry_forest	Tropical	No_data	No_data	No_data	25.9042	11.525	73.8782	153.6	33.6	18	15.6	25.4	24.1833	27.5667	23.8667	1135	154	53	34.8003	368	199	217	235
C620IF	2021-06-11	Central America	Dominican Republic	19.48467	-70.81134	Crop	Coccinia_grandis_-Tindora-	Tropical_dry_forest	Tropical	No_data	No_data	No_data	25.9042	11.525	73.8782	153.6	33.6	18	15.6	25.4	24.1833	27.5667	23.8667	1135	154	53	34.8003	368	199	217	235
C620IL	2021-06-21	Central America	Dominican Republic	19.44572	-70.74485	Crop	Hylocereus_costaricensis_-Pitahaya-	Tropical_dry_forest	Tropical	No_data	No_data	No_data	25.875	11.4833	74.086	150.008	33.5	18	15.5	25.3667	24.2167	27.5	23.8667	1140	156	59	34.1865	366	193	231	231
C620IH	2021-06-21	Central America	Dominican Republic	19.44908	-70.74942	Crop	Musa_sp._-Banana-	Tropical_dry_forest	Tropical	No_data	No_data	No_data	25.875	11.4833	74.086	150.008	33.5	18	15.5	25.3667	24.2167	27.5	23.8667	1140	156	59	34.1865	366	193	231	231
C620II	2021-06-21	Central America	Dominican Republic	19.44326	-70.74898	Crop	Papaya_-pawpaw-	Tropical_dry_forest	Tropical	No_data	No_data	No_data	25.875	11.4833	74.086	150.008	33.5	18	15.5	25.3667	24.2167	27.5	23.8667	1140	156	59	34.1865	366	193	231	231
C620IG	2021-06-21	Central America	Dominican Republic	19.44376	-70.74537	Crop	Psidium_guajava_-Guava-	Tropical_dry_forest	Tropical	No_data	No_data	No_data	25.875	11.4833	74.086	150.008	33.5	18	15.5	25.3667	24.2167	27.5	23.8667	1140	156	59	34.1865	366	193	231	231
C620IJ	2021-06-21	Central America	Dominican Republic	19.4453	-70.74765	Crop	Ipomoea_batatas_-Sweet_potato-	Tropical_dry_forest	Tropical	No_data	No_data	No_data	25.875	11.4833	74.086	150.008	33.5	18	15.5	25.3667	24.2167	27.5	23.8667	1140	156	59	34.1865	366	193	231	231
C620IK	2021-06-21	Central America	Dominican Republic	19.44468	-70.74675	Crop	Manihot_esculenta_-Cassava-	Tropical_dry_forest	Tropical	No_data	No_data	No_data	25.875	11.4833	74.086	150.008	33.5	18	15.5	25.3667	24.2167	27.5	23.8667	1140	156	59	34.1865	366	193	231	231
C620HV	2021-05-26	Northern South America	Ecuador	-0.334676389	-79.383568056	Natural	Ochroma_lagopus	Tropical_montane_forest	Tropical	No_data	No_data	No_data	24.1875	8.125	78.125	67.6933	29.7	19.3	10.4	25.05	23.55	25.0833	23.55	2791	530	46	85.5993	1497	155	1258	173
C620HU	2021-05-26	Northern South America	Ecuador	-0.303858333	-79.371962222	Crop	Coffea_arabica	Tropical_montane_forest	Tropical	No_data	No_data	No_data	24.0875	8.14167	79.0453	64.6714	29.6	19.3	10.3	24.9333	23.5	24.95	23.4667	2835	535	47	84.6102	1507	161	1279	176
C620HT	2021-05-26	Northern South America	Ecuador	-0.277282778	-79.353670278	Crop	Musa_sp._-Banana-	Tropical_montane_forest	Tropical	No_data	No_data	No_data	24	8.13333	78.9644	63.9602	29.5	19.2	10.3	24.8333	23.45	24.85	23.3667	2840	539	46	84.4711	1505	162	1286	174
C620HW	2021-05-26	Northern South America	Ecuador	-0.388002778	-79.366079722	Crop	Theobroma_cacao_	Tropical_montane_forest	Tropical	No_data	No_data	No_data	24.0958	8.175	77.8571	69.0342	29.7	19.2	10.5	24.9833	23.45	25.0167	23.45	2760	529	46	85.585	1488	150	1251	150
C620HS	2021-05-26	Northern South America	Ecuador	-0.251851389	-79.375558611	Crop	Manihot_esculenta_-Cassava-	Tropical_montane_forest	Tropical	No_data	No_data	No_data	24.1167	8.16667	79.288	63.1497	29.6	19.3	10.3	24.6333	23.5667	24.95	23.4833	2873	536	50	84.2151	1519	166	1292	178
C620HX	2021-05-27	Northern South America	Ecuador	-0.097100278	-79.300640556	Crop	Bactris_gasipaes_-Palm_sago-	Tropical_montane_forest	Tropical	No_data	No_data	No_data	23.8667	8.08333	80.033	64.1494	29.3	19.2	10.1	24.65	23.2667	24.6833	23.2167	2785	531	45	83.9847	1487	163	1281	168
C620HZ	2021-05-27	Northern South America	Ecuador	-0.072448611	-79.369913889	Crop	Elaeis_guineensis_-Palm_oil-	Tropical_montane_forest	Tropical	No_data	No_data	No_data	24.1583	8.05	79.703	65.8453	29.5	19.4	10.1	24.95	23.55	24.95	23.4833	2774	536	40	86.7066	1508	147	1508	154
C620I0	2021-05-27	Northern South America	Ecuador	-0.068035278	-79.357320556	Crop	Annona_comosus_-Pineapple-	Tropical_montane_forest	Tropical	No_data	No_data	No_data	24.0708	8.05833	79.7855	65.3473	29.4	19.3	10.1	24.85	23.4833	24.8667	23.4167	2785	535	42	85.6859	1503	154	1272	159
C620I1	2021-05-27	Northern South America	Ecuador	-0.102833056	-79.290698889	Crop	Annona_comosus_-Pineapple-	Tropical_montane_forest	Tropical	No_data	No_data	No_data	23.7583	8.11667	80.363	62.4075	29.2	19.1	10.1	24.5333	23.1667	24.55	23.1333	2771	527	46	83.5829	1479	165	1279	171
C620HY	2021-05-27	Northern South America	Ecuador	-0.074413333	-79.364907222	Crop	Musa_textilis_-Abaca-	Tropical_montane_forest	Tropical	No_data	No_data	No_data	24.1333	8.06667	79.868	66.3097	29.5	19.4	10.1	24.9167	23.5333	24.9333	23.4667	2784	536	41	86.1261	1507	151	1269	157
C621G2	2021-11-20	Europe	Finland	60.80542	23.49035	Crop	Avena_sativa_-Oat-	Boreal_Forest	Boreal	No_data	No_data	No_data	4.25417	8.20833	25.9757	829.525	21.4	-10.2	31.6	13.2167	-2.2	14.8833	-5.53333	619	83	30	33.9271	223	97	217	119
C621JN	2021-11-20	Europe	Finland	60.80561	23.49054	Crop	Avena_sativa_-Oat-	Boreal_Forest	Boreal	Yes	Yes	Chemical	4.25417	8.20833	25.9757	829.525	21.4	-10.2	31.6	13.2167	-2.2	14.8833	-5.53333	619	83	30	33.9271	223	97	217	119
C621JO	2021-11-20	Europe	Finland	60.80562	23.49055	Crop	Avena_sativa_-Oat-	Boreal_Forest	Boreal	Yes	Yes	Chemical	4.25417	8.20833	25.9757	829.525	21.4	-10.2	31.6	13.2167	-2.2	14.8833	-5.53333	619	83	30	33.9271	223	97	217	119
C621JP	2021-11-20	Europe	Finland	60.80563	23.49056	Crop	Avena_sativa_-Oat-	Boreal_Forest	Boreal	Yes	Yes	Chemical	4.25417	8.20833	25.9757	829.525	21.4	-10.2	31.6	13.2167	-2.2	14.8833	-5.53333	619	83	30	33.9271	223	97	217	119
C621G0	2021-11-20	Europe	Finland	60.80540	23.49033	Crop	Cenchrus_americanus_-Millet-	Boreal_Forest	Boreal	No_data	No_data	No_data	4.25417	8.20833	25.9757	829.525	21.4	-10.2	31.6	13.2167	-2.2	14.8833	-5.53333	619	83	30	33.9271	223	97	217	119
C621FG	2021-11-20	Europe	Finland	60.80520	23.49013	Crop	Hordeum_vulgare_-Barley-	Boreal_Forest	Boreal	Yes	Yes	Chemical	4.25417	8.20833	25.9757	829.525	21.4	-10.2	31.6	13.2167	-2.2	14.8833	-5.53333	619	83	30	33.9271	223	97	217	119
C621FI	2021-11-20	Europe	Finland	60.80522	23.49015	Crop	Hordeum_vulgare_-Barley-	Boreal_Forest	Boreal	Yes	Yes	Chemical	4.25417	8.20833	25.9757	829.525	21.4	-10.2	31.6	13.2167	-2.2	14.8833	-5.53333	619	83	30	33.9271	223	97	217	119
C621FO	2021-11-20	Europe	Finland	60.80528	23.49021	Crop	Hordeum_vulgare_-Barley-	Boreal_Forest	Boreal	Yes	Yes	Chemical	4.25417	8.20833	25.9757	829.525	21.4	-10.2	31.6	13.2167	-2.2	14.8833	-5.53333	619	83	30	33.9271	223	97	217	119
C621FQ	2021-11-20	Europe	Finland	60.80530	23.49023	Crop	Hordeum_vulgare_-Barley-	Boreal_Forest	Boreal	Yes	Yes	Chemical	4.25417	8.20833	25.9757	829.525	21.4	-10.2	31.6	13.2167	-2.2	14.8833	-5.53333	619	83	30	33.9271	223	97	217	119
C621JQ	2021-11-20	Europe	Finland	60.80564	23.49057	Crop	Hordeum_vulgare_-Barley-	Boreal_Forest	Boreal	Yes	Yes	Chemical	4.25417	8.20833	25.9757	829.525	21.4	-10.2	31.6	13.2167	-2.2	14.8833	-5.53333	619	83	30	33.9271	223	97	217	119
C621JR	2021-11-20	Europe	Finland	60.80565	23.49058	Crop	Hordeum_vulgare_-Barley-	Boreal_Forest	Boreal	Yes	Yes	Chemical	4.25417	8.20833	25.9757	829.525	21.4	-10.2	31.6	13.2167	-2.2	14.8833	-5.53333	619	83	30	33.9271	223	97	217	119
C621JS	2021-11-20	Europe	Finland	60.80566	23.49059	Crop	Hordeum_vulgare_-Barley-	Boreal_Forest	Boreal	Yes	Yes	Chemical	4.25417	8.20833	25.9757	829.525	21.4	-10.2	31.6	13.2167	-2.2	14.8833	-5.53333	619	83	30	33.9271	223	97	217	119
C621FC	2021-11-20	Europe	Finland	60.80516	23.49009	Crop	Triticum_aestivum_-Wheat-	Boreal_Forest	Boreal	Yes	Yes	Chemical	4.25417	8.20833	25.9757	829.525	21.4	-10.2	31.6	13.2167	-2.2	14.8833	-5.53333	619	83	30	33.9271	223	97	217	119
C621FD	2021-11-20	Europe	Finland	60.80517	23.49010	Crop	Triticum_aestivum_-Wheat-	Boreal_Forest	Boreal	Yes	Yes	Chemical	4.25417	8.20833	25.9757	829.525	21.4	-10.2	31.6	13.2167	-2.2	14.8833	-5.53333	619	83	30	33.9271	223	97	217	119
C621FF	2021-11-20	Europe	Finland	60.80519	23.49012	Crop	Triticum_aestivum_-Wheat-	Boreal_Forest	Boreal	Yes	Yes	Chemical	4.25417	8.20833	25.9757	829.525	21.4	-10.2	31.6	13.2167	-2.2	14.8833	-5.53333	619	83	30	33.9271	223	97	217	119
C621FK	2021-11-20	Europe	Finland	60.80524	23.49017	Crop	Triticum_aestivum_-Wheat-	Boreal_Forest	Boreal	Yes	Yes	Chemical	4.25417	8.20833	25.9757	829.525	21.4	-10.2	31.6	13.2167	-2.2	14.8833	-5.53333	619	83	30	33.9271	223	97	217	119
C621FL	2021-11-20	Europe	Finland	60.80525	23.49018	Crop	Triticum_aestivum_-Wheat-	Boreal_Forest	Boreal	Yes	Yes	Chemical	4.25417	8.20833	25.9757	829.525	21.4	-10.2	31.6	13.2167	-2.2	14.8833	-5.53333	619	83	30	33.9271	223	97	217	119
C621FN	2021-11-20	Europe	Finland	60.80527	23.49020	Crop	Triticum_aestivum_-Wheat-	Boreal_Forest	Boreal	Yes	Yes	Chemical	4.25417	8.20833	25.9757	829.525	21.4	-10.2	31.6	13.2167	-2.2	14.8833	-5.53333	619	83	30	33.9271	223	97	217	119
C621GF	2021-11-20	Europe	Finland	60.80555	23.49048	Natural	No_data	Boreal_Forest	Boreal	No_data	No_data	No_data	4.25417	8.20833	25.9757	829.525	21.4	-10.2	31.6	13.2167	-2.2	14.8833	-5.53333	619	83	30	33.9271	223	97	217	119
C621GG	2021-11-20	Europe	Finland	60.80556	23.49049	Natural	No_data	Boreal_Forest	Boreal	No_data	No_data	No_data	4.25417	8.20833	25.9757	829.525	21.4	-10.2	31.6	13.2167	-2.2	14.8833	-5.53333	619	83	30	33.9271	223	97	217	119
C621GH	2021-11-20	Europe	Finland	60.80557	23.49050	Natural	No_data	Boreal_Forest	Boreal	No_data	No_data	No_data	4.25417	8.20833	25.9757	829.525	21.4	-10.2	31.6	13.2167	-2.2	14.8833	-5.53333	619	83	30	33.9271	223	97	217	119
C621GI	2021-11-20	Europe	Finland	60.80558	23.49051	Natural	No_data	Boreal_Forest	Boreal	No_data	No_data	No_data	4.25417	8.20833	25.9757	829.525	21.4	-10.2	31.6	13.2167	-2.2	14.8833	-5.53333	619	83	30	33.9271	223	97	217	119
C621GJ	2021-11-20	Europe	Finland	60.80559	23.49052	Natural	No_data	Boreal_Forest	Boreal	No_data	No_data	No_data	4.25417	8.20833	25.9757	829.525	21.4	-10.2	31.6	13.2167	-2.2	14.8833	-5.53333	619	83	30	33.9271	223	97	217	119
C621GK	2021-11-20	Europe	Finland	60.80560	23.49053	Natural	No_data	Boreal_Forest	Boreal	No_data	No_data	No_data	4.25417	8.20833	25.9757	829.525	21.4	-10.2	31.6	13.2167	-2.2	14.8833	-5.53333	619	83	30	33.9271	223	97	217	119
C621FW	2021-11-20	Europe	Finland	60.80536	23.49029	Crop	Glycine_max_-Soybean-	Boreal_Forest	Boreal	No_data	No_data	No_data	4.25417	8.20833	25.9757	829.525	21.4	-10.2	31.6	13.2167	-2.2	14.8833	-5.53333	619	83	30	33.9271	223	97	217	119
C621FT	2021-11-20	Europe	Finland	60.80533	23.49026	Crop	Lens_culinaris_-Lentil-	Boreal_Forest	Boreal	No_data	No_data	No_data	4.25417	8.20833	25.9757	829.525	21.4	-10.2	31.6	13.2167	-2.2	14.8833	-5.53333	619	83	30	33.9271	223	97	217	119
C621FS	2021-11-20	Europe	Finland	60.80532	23.49025	Crop	Lupinus_spp._-Lupine-	Boreal_Forest	Boreal	No_data	No_data	No_data	4.25417	8.20833	25.9757	829.525	21.4	-10.2	31.6	13.2167	-2.2	14.8833	-5.53333	619	83	30	33.9271	223	97	217	119
C621FU	2021-11-20	Europe	Finland	60.80534	23.49027	Crop	Phaseolus_vulgaris_-Bean-	Boreal_Forest	Boreal	No_data	No_data	No_data	4.25417	8.20833	25.9757	829.525	21.4	-10.2	31.6	13.2167	-2.2	14.8833	-5.53333	619	83	30	33.9271	223	97	217	119
C621FY	2021-11-20	Europe	Finland	60.80538	23.49031	Crop	Phaseolus_vulgaris_-Bean-	Boreal_Forest	Boreal	No_data	No_data	No_data	4.25417	8.20833	25.9757	829.525	21.4	-10.2	31.6	13.2167	-2.2	14.8833	-5.53333	619	83	30	33.9271	223	97	217	119
C621G3	2021-11-20	Europe	Finland	60.80543	23.49036	Crop	Phaseolus_vulgaris_-Bean-	Boreal_Forest	Boreal	No_data	No_data	No_data	4.25417	8.20833	25.9757	829.525	21.4	-10.2	31.6	13.2167	-2.2	14.8833	-5.53333	619	83	30	33.9271	223	97	217	119
C621G4	2021-11-20	Europe	Finland	60.80544	23.49037	Crop	Phaseolus_vulgaris_-Bean-	Boreal_Forest	Boreal	No_data	No_data	No_data	4.25417	8.20833	25.9757	829.525	21.4	-10.2	31.6	13.2167	-2.2	14.8833	-5.53333	619	83	30	33.9271	223	97	217	119
C621FJ	2021-11-20	Europe	Finland	60.80523	23.49016	Crop	Pisum_sativum_-Pea-	Boreal_Forest	Boreal	Yes	Yes	Chemical	4.25417	8.20833	25.9757	829.525	21.4	-10.2	31.6	13.2167	-2.2	14.8833	-5.53333	619	83	30	33.9271	223	97	217	119
C621FR	2021-11-20	Europe	Finland	60.80531	23.49024	Crop	Pisum_sativum_-Pea-	Boreal_Forest	Boreal	Yes	Yes	Chemical	4.25417	8.20833	25.9757	829.525	21.4	-10.2	31.6	13.2167	-2.2	14.8833	-5.53333	619	83	30	33.9271	223	97	217	119
C621FV	2021-11-20	Europe	Finland	60.80535	23.49028	Crop	Pisum_sativum_-Pea-	Boreal_Forest	Boreal	No_data	No_data	No_data	4.25417	8.20833	25.9757	829.525	21.4	-10.2	31.6	13.2167	-2.2	14.8833	-5.53333	619	83	30	33.9271	223	97	217	119
C621GE	2021-11-20	Europe	Finland	60.80554	23.49047	Crop	Achillea_millefolium	Boreal_Forest	Boreal	No_data	No_data	No_data	4.25417	8.20833	25.9757	829.525	21.4	-10.2	31.6	13.2167	-2.2	14.8833	-5.53333	619	83	30	33.9271	223	97	217	119
C621GB	2021-11-20	Europe	Finland	60.80551	23.49044	Crop	Artemisia_absinthium	Boreal_Forest	Boreal	No_data	No_data	No_data	4.25417	8.20833	25.9757	829.525	21.4	-10.2	31.6	13.2167	-2.2	14.8833	-5.53333	619	83	30	33.9271	223	97	217	119
C621G1	2021-11-20	Europe	Finland	60.80541	23.49034	Crop	Cannabis_sativa_-Hemp-	Boreal_Forest	Boreal	No_data	No_data	No_data	4.25417	8.20833	25.9757	829.525	21.4	-10.2	31.6	13.2167	-2.2	14.8833	-5.53333	619	83	30	33.9271	223	97	217	119
C621G5	2021-11-20	Europe	Finland	60.80545	23.49038	Crop	Carum_carvi_-Caraway-	Boreal_Forest	Boreal	No_data	No_data	No_data	4.25417	8.20833	25.9757	829.525	21.4	-10.2	31.6	13.2167	-2.2	14.8833	-5.53333	619	83	30	33.9271	223	97	217	119
C621G8	2021-11-20	Europe	Finland	60.80548	23.49041	Crop	Centaurea_jacea	Boreal_Forest	Boreal	No_data	No_data	No_data	4.25417	8.20833	25.9757	829.525	21.4	-10.2	31.6	13.2167	-2.2	14.8833	-5.53333	619	83	30	33.9271	223	97	217	119
C621FZ	2021-11-20	Europe	Finland	60.80539	23.49032	Crop	Chenopodium_quinoa_-Quinoa-	Boreal_Forest	Boreal	No_data	No_data	No_data	4.25417	8.20833	25.9757	829.525	21.4	-10.2	31.6	13.2167	-2.2	14.8833	-5.53333	619	83	30	33.9271	223	97	217	119
C621FX	2021-11-20	Europe	Finland	60.80537	23.49030	Crop	Fagopyrum_esculentum_-Buckwheat-	Boreal_Forest	Boreal	No_data	No_data	No_data	4.25417	8.20833	25.9757	829.525	21.4	-10.2	31.6	13.2167	-2.2	14.8833	-5.53333	619	83	30	33.9271	223	97	217	119
C621GC	2021-11-20	Europe	Finland	60.80552	23.49045	Crop	Filipendula_ulmaria	Boreal_Forest	Boreal	No_data	No_data	No_data	4.25417	8.20833	25.9757	829.525	21.4	-10.2	31.6	13.2167	-2.2	14.8833	-5.53333	619	83	30	33.9271	223	97	217	119
C621GA	2021-11-20	Europe	Finland	60.80550	23.49043	Crop	Galium_verum	Boreal_Forest	Boreal	No_data	No_data	No_data	4.25417	8.20833	25.9757	829.525	21.4	-10.2	31.6	13.2167	-2.2	14.8833	-5.53333	619	83	30	33.9271	223	97	217	119
C621G6	2021-11-20	Europe	Finland	60.80546	23.49039	Crop	Isatis_tinctoria_-Woad-	Boreal_Forest	Boreal	No_data	No_data	No_data	4.25417	8.20833	25.9757	829.525	21.4	-10.2	31.6	13.2167	-2.2	14.8833	-5.53333	619	83	30	33.9271	223	97	217	119
C621G9	2021-11-20	Europe	Finland	60.80549	23.49042	Crop	Matricaria_chamomilla	Boreal_Forest	Boreal	No_data	No_data	No_data	4.25417	8.20833	25.9757	829.525	21.4	-10.2	31.6	13.2167	-2.2	14.8833	-5.53333	619	83	30	33.9271	223	97	217	119
C621G7	2021-11-20	Europe	Finland	60.80547	23.49040	Crop	Tanacetum_vulgare_-Tansy-	Boreal_Forest	Boreal	No_data	No_data	No_data	4.25417	8.20833	25.9757	829.525	21.4	-10.2	31.6	13.2167	-2.2	14.8833	-5.53333	619	83	30	33.9271	223	97	217	119
C621GD	2021-11-20	Europe	Finland	60.80553	23.49046	Crop	Urtica_dioica	Boreal_Forest	Boreal	No_data	No_data	No_data	4.25417	8.20833	25.9757	829.525	21.4	-10.2	31.6	13.2167	-2.2	14.8833	-5.53333	619	83	30	33.9271	223	97	217	119
C621FE	2021-11-20	Europe	Finland	60.80518	23.49011	Crop	Brassica_napus_-Rapeseed-	Boreal_Forest	Boreal	Yes	Yes	Chemical	4.25417	8.20833	25.9757	829.525	21.4	-10.2	31.6	13.2167	-2.2	14.8833	-5.53333	619	83	30	33.9271	223	97	217	119
C621FH	2021-11-20	Europe	Finland	60.80521	23.49014	Crop	Brassica_napus_-Rapeseed-	Boreal_Forest	Boreal	Yes	Yes	Chemical	4.25417	8.20833	25.9757	829.525	21.4	-10.2	31.6	13.2167	-2.2	14.8833	-5.53333	619	83	30	33.9271	223	97	217	119
C621FM	2021-11-20	Europe	Finland	60.80526	23.49019	Crop	Brassica_napus_-Rapeseed-	Boreal_Forest	Boreal	Yes	Yes	Chemical	4.25417	8.20833	25.9757	829.525	21.4	-10.2	31.6	13.2167	-2.2	14.8833	-5.53333	619	83	30	33.9271	223	97	217	119
C621FP	2021-11-20	Europe	Finland	60.80529	23.49022	Crop	Brassica_napus_-Rapeseed-	Boreal_Forest	Boreal	Yes	Yes	Chemical	4.25417	8.20833	25.9757	829.525	21.4	-10.2	31.6	13.2167	-2.2	14.8833	-5.53333	619	83	30	33.9271	223	97	217	119
C620TL	2021-07-18	Europe	France	46.474123	-1.531036	Crop	Helianthus_annuus_-Sunflower-	Temperate_deciduous_forest	Temperate	Yes	Yes	No_data	12.5208	8.125	38.1455	495.867	24.5	3.2	21.3	10.05	18.6167	18.6167	6.6	760	90	37	30.4407	260	114	114	242
C620TH	2021-07-20	Europe	France	46.17536	0.10636	Crop	Triticum_aestivum_-Wheat-	Temperate_deciduous_forest	Temperate	Yes	Yes	No_data	11.6917	9.4	39.8305	544.392	25.3	1.7	23.6	6.01667	18.5333	18.5333	5.35	878	99	47	23.6896	287	150	150	272
C620TE	2021-07-20	Europe	France	46.1683	0.10301	Crop	Pisum_sativum_-Pea-	Temperate_deciduous_forest	Temperate	Yes	Yes	No_data	11.6958	9.39167	39.7952	544.065	25.3	1.7	23.6	6.03333	18.5333	18.5333	5.35	878	99	47	23.891	288	150	150	273
C620TG	2021-07-20	Europe	France	46.17545	0.10426	Crop	Nicotiana_tabacum_-Tobacco-	Temperate_deciduous_forest	Temperate	Yes	Yes	No_data	11.6917	9.4	39.8305	544.392	25.3	1.7	23.6	6.01667	18.5333	18.5333	5.35	878	99	47	23.6896	287	150	150	272
C620TF	2021-07-20	Europe	France	46.16742	0.10749	Crop	Brassica_napus_-Rapeseed-	Temperate_deciduous_forest	Temperate	Yes	Yes	No_data	11.6958	9.39167	39.7952	544.065	25.3	1.7	23.6	6.03333	18.5333	18.5333	5.35	878	99	47	23.891	288	150	150	273
C620TI	2021-07-20	Europe	France	46.16616	0.10421	Crop	Helianthus_annuus_-Sunflower-	Temperate_deciduous_forest	Temperate	Yes	Yes	No_data	11.6917	9.38333	39.5921	545.339	25.4	1.7	23.7	6.01667	18.55	18.55	5.35	881	99	47	23.8908	289	150	150	273
C620TJ	2021-07-20	Europe	France	46.17587	0.10534	Crop	Helianthus_annuus_-Sunflower-	Temperate_deciduous_forest	Temperate	Yes	Yes	No_data	11.6917	9.4	39.8305	544.392	25.3	1.7	23.6	6.01667	18.5333	18.5333	5.35	878	99	47	23.6896	287	150	150	272
C620TK	2021-07-20	Europe	France	47.00197	0.23594	Crop	Helianthus_annuus_-Sunflower-	Temperate_deciduous_forest	Temperate	Yes	Yes	No_data	11.3958	9.29167	38.8773	548.869	25.6	1.7	23.9	5.78333	18.3167	18.3167	5.03333	687	72	42	17.8427	208	135	135	197
C620TB	2021-07-21	Europe	France	47.51663	-0.40159	Crop	Cannabis_sativa_-Hemp-	Temperate_deciduous_forest	Temperate	Yes	Yes	No_data	11.7875	9.04167	39.3116	532.448	25.1	2.1	23	6.31667	18.5167	18.5167	5.56667	706	75	41	20.3303	221	130	130	211
C620TC	2021-07-21	Europe	France	47.43132	-0.46068	Crop	Cannabis_sativa_-Hemp-	Temperate_deciduous_forest	Temperate	Yes	Yes	No_data	11.9125	9.00833	38.829	538.213	25.4	2.2	23.2	6.36667	18.7333	18.7333	5.61667	707	75	41	20.7538	222	128	128	211
C620TM	2021-09-01	Europe	France	46.79973318	0.00848635	Crop	Cucumis_melo_-Melon-	Temperate_deciduous_forest	Temperate	Yes	Yes	No_data	11.4833	9.73333	39.5664	555.724	26.1	1.5	24.6	5.81667	18.5167	18.5167	5.06667	733	81	45	19.7926	230	139	139	212
C620TN	2021-09-01	Europe	France	46.796694	0.013778	Crop	Cucumis_melo_-Melon-	Temperate_deciduous_forest	Temperate	Yes	Yes	No_data	11.4833	9.73333	39.5664	555.724	26.1	1.5	24.6	5.81667	18.5167	18.5167	5.06667	733	81	45	19.7926	230	139	139	212
C620TO	2021-09-01	Europe	France	46.77861111	0.02580556	Crop	Cucumis_melo_-Melon-	Temperate_deciduous_forest	Temperate	Yes	Yes	No_data	11.5	9.8	39.5161	557.702	26.3	1.5	24.8	5.83333	18.5833	18.5833	5.08333	730	80	45	19.721	229	139	139	212
C620TP	2021-09-01	Europe	France	46.777361	0.017694	Crop	Cucumis_melo_-Melon-	Temperate_deciduous_forest	Temperate	Yes	Yes	No_data	11.4875	9.775	39.5749	557.764	26.2	1.5	24.7	5.81667	18.5667	18.5667	5.06667	733	81	45	19.8283	231	140	140	213
C620TD	2021-09-08	Europe	France	48.47268678	4.13995877	Crop	Cannabis_sativa_-Hemp-	Temperate_deciduous_forest	Temperate	Yes	Yes	No_data	10.4958	9.80833	38.0168	597.675	25.4	-0.4	25.8	17.5833	6.45	18.0667	3.38333	683	65	45	10.8568	186	142	183	169
C620TQ	2021-09-08	Europe	France	48.343175	3.84763611	Crop	Cannabis_sativa_-Hemp-	Temperate_deciduous_forest	Temperate	Yes	Yes	No_data	10.3875	9.625	37.5977	596.65	25.2	-0.4	25.6	17.4833	6.33333	17.9167	3.25	669	64	40	13.1032	186	134	180	167
C620TR	2021-09-13	Europe	France	47.41868557	-1.53025554	Crop	Brassica_oleracea_-Cabbage-	Temperate_deciduous_forest	Temperate	No	Yes	Organic	11.7292	8.45833	38.6225	504.59	24.4	2.5	21.9	6.66667	18.0833	18.0833	5.86667	769	86	42	23.5354	249	133	133	233
C620TT	2021-09-23	Europe	France	47.13065	-1.944633	Crop	Lactuca_sativa_-Lettuce-	Temperate_deciduous_forest	Temperate	Yes	Yes	No_data	12.2792	7.75833	37.1212	494.301	24.2	3.3	20.9	7.35	18.4667	18.4667	6.5	779	90	41	28.2891	265	123	123	248
C620TS	2021-09-23	Europe	France	46.779522	-1.864836	Crop	Solanum_lycopersicum_-Tomato-	Temperate_deciduous_forest	Temperate	No	Yes	No_data	12.4833	7.9	37.9808	489.11	24.3	3.5	20.8	7.6	18.5667	18.5667	6.7	763	88	37	29.3671	260	117	117	244
C620TU	2021-09-23	Europe	France	47.088556	-1.591611	Crop	Helianthus_annuus_-Sunflower-	Temperate_deciduous_forest	Temperate	Yes	Yes	No_data	11.9167	8.25	38.5514	498.75	24.1	2.7	21.4	6.85	18.15	18.15	6.05	776	88	41	26.3551	257	127	127	245
C620T1	2021-11-07	Europe	France	47.02349	0.04149	Crop	Brassica_napus_-Rapeseed-	Temperate_deciduous_forest	Temperate	Yes	Yes	No_data	11.4625	9.24167	39.3262	539.979	25.2	1.7	23.5	5.91667	18.25	18.25	5.16667	708	75	43	19.0162	218	135	135	205
C620T2	2021-11-07	Europe	France	46.67934	0.15509	Crop	Brassica_napus_-Rapeseed-	Temperate_deciduous_forest	Temperate	Yes	Yes	No_data	11.3	9.68333	39.6858	551.811	25.7	1.3	24.4	5.63333	18.2833	18.2833	4.91667	733	79	44	19.1752	227	140	140	210
C620T3	2021-11-07	Europe	France	46.36717	0.18372	Crop	Brassica_napus_-Rapeseed-	Temperate_deciduous_forest	Temperate	Yes	Yes	No_data	11.4417	9.2	38.8186	545.402	25.2	1.5	23.7	5.8	18.3167	18.3167	5.11667	809	89	44	21.3223	258	146	146	243
C620T4	2021-11-07	Europe	France	46.23146	0.21749	Crop	Brassica_napus_-Rapeseed-	Temperate_deciduous_forest	Temperate	Yes	Yes	No_data	11.625	9.31667	39.6454	544.754	25.2	1.7	23.5	5.95	18.4833	18.4833	5.28333	840	93	46	21.7036	268	149	149	254
C620T5	2021-11-07	Europe	France	46.13412	0.23852	Crop	Brassica_napus_-Rapeseed-	Temperate_deciduous_forest	Temperate	Yes	Yes	No_data	11.85	9.31667	39.4774	545.269	25.5	1.9	23.6	6.18333	18.7	18.7	5.5	834	92	46	21.4904	266	149	149	251
C620T6	2021-11-07	Europe	France	46.48039	-1.10264	Crop	Brassica_napus_-Rapeseed-	Temperate_deciduous_forest	Temperate	Yes	Yes	No_data	12.4583	8.68333	38.9387	523.567	25.1	2.8	22.3	9.65	18.9333	18.9333	6.18333	749	89	38	28.1234	252	118	118	230
C620T7	2021-11-07	Europe	France	46.42757	-0.78037	Crop	Brassica_napus_-Rapeseed-	Temperate_deciduous_forest	Temperate	Yes	Yes	No_data	12.3792	8.875	38.2543	543.555	25.7	2.5	23.2	9.41667	19.15	19.15	5.95	771	95	38	26.6662	256	129	129	228
C620T8	2021-11-07	Europe	France	46.42919	-0.4676	Crop	Brassica_napus_-Rapeseed-	Temperate_deciduous_forest	Temperate	Yes	Yes	No_data	12.0125	9.10833	38.5946	545.707	25.7	2.1	23.6	6.4	18.85	18.85	5.63333	825	107	41	25.4868	274	149	149	234
C620T9	2021-11-07	Europe	France	46.07648	-0.14456	Crop	Brassica_napus_-Rapeseed-	Temperate_deciduous_forest	Temperate	Yes	Yes	No_data	11.8958	9.34167	39.0865	545.933	25.7	1.8	23.9	6.25	18.75	18.75	5.56667	904	104	47	24.0546	299	156	156	274
C620TA	2021-11-07	Europe	France	45.95338	-0.31431	Crop	Brassica_napus_-Rapeseed-	Temperate_deciduous_forest	Temperate	Yes	Yes	No_data	12.3042	9.35833	39.1562	547.571	26.1	2.2	23.9	6.63333	19.1667	19.1667	5.91667	875	105	45	24.7143	290	151	151	259
C620M0	2022-01-09	Europe	France	43.68922801	4.65321313	Crop	Triticum_aestivum_-Wheat-	Mediterranean_forest	Mediterranean	No_data	No_data	No_data	15.1208	9.69167	35.1147	647.862	30.4	2.8	27.6	15.5167	23.4167	23.4167	7.51667	714	120	23	38.4001	254	108	108	182
C620M1	2022-01-09	Europe	France	43.69062561	4.64582523	Crop	Triticum_aestivum_-Wheat-	Mediterranean_forest	Mediterranean	No_data	No_data	No_data	15.1333	9.66667	35.0242	647.847	30.4	2.8	27.6	15.5167	23.4333	23.4333	7.53333	717	121	23	38.6688	255	108	108	183
C620M2	2022-01-09	Europe	France	43.6892288	4.65354103	Crop	Triticum_aestivum_-Wheat-	Mediterranean_forest	Mediterranean	No_data	No_data	No_data	15.1208	9.69167	35.1147	647.862	30.4	2.8	27.6	15.5167	23.4167	23.4167	7.51667	714	120	23	38.4001	254	108	108	182
C620M3	2022-01-09	Europe	France	43.68879307	4.64529206	Crop	Triticum_aestivum_-Wheat-	Mediterranean_forest	Mediterranean	No_data	No_data	No_data	15.1333	9.66667	35.0242	647.847	30.4	2.8	27.6	15.5167	23.4333	23.4333	7.53333	717	121	23	38.6688	255	108	108	183
C620M5	2022-01-09	Europe	France	43.69052125	4.64677323	Crop	Triticum_aestivum_-Wheat-	Mediterranean_forest	Mediterranean	No_data	No_data	No_data	15.1333	9.66667	35.0242	647.847	30.4	2.8	27.6	15.5167	23.4333	23.4333	7.53333	717	121	23	38.6688	255	108	108	183
C620M7	2022-01-09	Europe	France	43.68821707	4.64471438	Crop	Triticum_aestivum_-Wheat-	Mediterranean_forest	Mediterranean	No_data	No_data	No_data	15.1333	9.66667	35.0242	647.847	30.4	2.8	27.6	15.5167	23.4333	23.4333	7.53333	717	121	23	38.6688	255	108	108	183
C620M8	2022-01-09	Europe	France	43.68749601	4.6446552	Crop	Triticum_aestivum_-Wheat-	Mediterranean_forest	Mediterranean	No_data	No_data	No_data	15.1333	9.66667	35.0242	647.847	30.4	2.8	27.6	15.5167	23.4333	23.4333	7.53333	717	121	23	38.6688	255	108	108	183
C620M9	2022-01-09	Europe	France	43.68953743	4.64566371	Crop	Triticum_aestivum_-Wheat-	Mediterranean_forest	Mediterranean	No_data	No_data	No_data	15.1333	9.66667	35.0242	647.847	30.4	2.8	27.6	15.5167	23.4333	23.4333	7.53333	717	121	23	38.6688	255	108	108	183
C620MA	2022-01-09	Europe	France	43.68979886	4.64543615	Crop	Triticum_aestivum_-Wheat-	Mediterranean_forest	Mediterranean	No_data	No_data	No_data	15.1333	9.66667	35.0242	647.847	30.4	2.8	27.6	15.5167	23.4333	23.4333	7.53333	717	121	23	38.6688	255	108	108	183
C620MB	2022-01-09	Europe	France	43.68956391	4.64512643	Crop	Triticum_aestivum_-Wheat-	Mediterranean_forest	Mediterranean	No_data	No_data	No_data	15.1333	9.66667	35.0242	647.847	30.4	2.8	27.6	15.5167	23.4333	23.4333	7.53333	717	121	23	38.6688	255	108	108	183
C620MD	2022-01-09	Europe	France	43.69057205	4.64630141	Crop	Triticum_aestivum_-Wheat-	Mediterranean_forest	Mediterranean	No_data	No_data	No_data	15.1333	9.66667	35.0242	647.847	30.4	2.8	27.6	15.5167	23.4333	23.4333	7.53333	717	121	23	38.6688	255	108	108	183
C620MF	2022-01-09	Europe	France	43.69059652	4.64604626	Crop	Triticum_aestivum_-Wheat-	Mediterranean_forest	Mediterranean	No_data	No_data	No_data	15.1333	9.66667	35.0242	647.847	30.4	2.8	27.6	15.5167	23.4333	23.4333	7.53333	717	121	23	38.6688	255	108	108	183
C620MI	2022-01-09	Europe	France	43.68956949	4.65376784	Crop	Triticum_aestivum_-Wheat-	Mediterranean_forest	Mediterranean	No_data	No_data	No_data	15.1208	9.69167	35.1147	647.862	30.4	2.8	27.6	15.5167	23.4167	23.4167	7.51667	714	120	23	38.4001	254	108	108	182
C620MJ	2022-01-09	Europe	France	43.68274561	4.64900038	Crop	Triticum_aestivum_-Wheat-	Mediterranean_forest	Mediterranean	No_data	No_data	No_data	15.1625	9.625	35	645.612	30.4	2.9	27.5	15.55	23.4333	23.4333	7.6	712	121	22	39.2056	254	106	106	182
C620MK	2022-01-09	Europe	France	43.68786285	4.64467163	Crop	Triticum_aestivum_-Wheat-	Mediterranean_forest	Mediterranean	No_data	No_data	No_data	15.1333	9.66667	35.0242	647.847	30.4	2.8	27.6	15.5167	23.4333	23.4333	7.53333	717	121	23	38.6688	255	108	108	183
C620ML	2022-01-09	Europe	France	43.68301404	4.64774033	Crop	Triticum_aestivum_-Wheat-	Mediterranean_forest	Mediterranean	No_data	No_data	No_data	15.1625	9.625	35	645.612	30.4	2.9	27.5	15.55	23.4333	23.4333	7.6	712	121	22	39.2056	254	106	106	182
C620MM	2022-01-09	Europe	France	43.68303847	4.64817837	Crop	Triticum_aestivum_-Wheat-	Mediterranean_forest	Mediterranean	No_data	No_data	No_data	15.1625	9.625	35	645.612	30.4	2.9	27.5	15.55	23.4333	23.4333	7.6	712	121	22	39.2056	254	106	106	182
C620MN	2022-01-09	Europe	France	43.68959467	4.64488294	Crop	Triticum_aestivum_-Wheat-	Mediterranean_forest	Mediterranean	No_data	No_data	No_data	15.1333	9.66667	35.0242	647.847	30.4	2.8	27.6	15.5167	23.4333	23.4333	7.53333	717	121	23	38.6688	255	108	108	183
C620MO	2022-01-09	Europe	France	43.68863247	4.64471731	Crop	Triticum_aestivum_-Wheat-	Mediterranean_forest	Mediterranean	No_data	No_data	No_data	15.1333	9.66667	35.0242	647.847	30.4	2.8	27.6	15.5167	23.4333	23.4333	7.53333	717	121	23	38.6688	255	108	108	183
C620MP	2022-01-09	Europe	France	43.68902701	4.65319829	Crop	Triticum_aestivum_-Wheat-	Mediterranean_forest	Mediterranean	No_data	No_data	No_data	15.1208	9.69167	35.1147	647.862	30.4	2.8	27.6	15.5167	23.4167	23.4167	7.51667	714	120	23	38.4001	254	108	108	182
C620MQ	2022-01-09	Europe	France	43.68875074	4.64608951	Crop	Triticum_aestivum_-Wheat-	Mediterranean_forest	Mediterranean	No_data	No_data	No_data	15.1333	9.66667	35.0242	647.847	30.4	2.8	27.6	15.5167	23.4333	23.4333	7.53333	717	121	23	38.6688	255	108	108	183
C620MR	2022-01-09	Europe	France	43.68289175	4.64841046	Crop	Triticum_aestivum_-Wheat-	Mediterranean_forest	Mediterranean	No_data	No_data	No_data	15.1625	9.625	35	645.612	30.4	2.9	27.5	15.55	23.4333	23.4333	7.6	712	121	22	39.2056	254	106	106	182
C620LZ	2022-01-09	Europe	France	43.68275651	4.64868707	Crop	Solanum_lycopersicum_-Tomato-	Mediterranean_forest	Mediterranean	No_data	No_data	No_data	15.1625	9.625	35	645.612	30.4	2.9	27.5	15.55	23.4333	23.4333	7.6	712	121	22	39.2056	254	106	106	182
C620M4	2022-01-09	Europe	France	43.68987836	4.64588785	Crop	Solanum_lycopersicum_-Tomato-	Mediterranean_forest	Mediterranean	No_data	No_data	No_data	15.1333	9.66667	35.0242	647.847	30.4	2.8	27.6	15.5167	23.4333	23.4333	7.53333	717	121	23	38.6688	255	108	108	183
C620ME	2022-12-19	Europe	France	43.69862219	4.64971745	Crop	Oryza_sativa_-Rice-	Mediterranean_forest	Mediterranean	No_data	No_data	No_data	15.0917	9.71667	35.2053	645.892	30.4	2.8	27.6	15.4833	23.3667	23.3667	7.51667	717	121	23	38.7197	255	108	108	183
C620MG	2022-12-19	Europe	France	43.69028471	4.64533456	Crop	Triticum_aestivum_-Wheat-	Mediterranean_forest	Mediterranean	No_data	No_data	No_data	15.1333	9.66667	35.0242	647.847	30.4	2.8	27.6	15.5167	23.4333	23.4333	7.53333	717	121	23	38.6688	255	108	108	183
C620LY	2022-12-19	Europe	France	43.70525354	4.72796696	Crop	Olea_europea_-Olive-	Mediterranean_forest	Mediterranean	No_data	No_data	No_data	14.8542	9.79167	35.0956	647.999	30.3	2.4	27.9	15.2667	23.1333	23.1333	7.23333	710	118	23	38.0318	252	107	107	180
C620MH	2022-12-19	Europe	France	43.72102354	4.86932642	Crop	Prunus_dulcis_-Almond-	Mediterranean_forest	Mediterranean	No_data	No_data	No_data	14.4417	10	35.461	654.005	30.2	2	28.2	14.8667	22.8333	22.8333	6.75	732	117	25	35.7693	257	114	114	181
C620M6	2022-12-19	Europe	France	43.68993305	4.64480281	Crop	Solanum_lycopersicum_-Tomato-	Mediterranean_forest	Mediterranean	No_data	No_data	No_data	15.1333	9.66667	35.0242	647.847	30.4	2.8	27.6	15.5167	23.4333	23.4333	7.53333	717	121	23	38.6688	255	108	108	183
C620MC	2022-12-19	Europe	France	43.72085184	4.87048086	Crop	Vitis_vinifera_-Vine-	Mediterranean_forest	Mediterranean	No_data	No_data	No_data	14.4417	10	35.461	654.005	30.2	2	28.2	14.8667	22.8333	22.8333	6.75	732	117	25	35.7693	257	114	114	181
C620CC	2021-05-18	Europe	Germany	51.028772222	9.162266667	Crop	Triticum_aestivum_-Wheat-	Temperate_deciduous_forest	Temperate	No_data	No_data	No_data	8.35	8.3	32.9365	634.139	22.5	-2.7	25.2	14.7833	4.01667	16.3167	0.733333	678	71	41	14.5789	202	139	191	154
C620CD	2021-05-18	Europe	Germany	51.024800000	9.156533333	Crop	Triticum_aestivum_-Wheat-	Temperate_deciduous_forest	Temperate	No_data	No_data	No_data	8.28333	8.2	32.6693	633.189	22.4	-2.7	25.1	14.7333	3.96667	16.2333	0.666667	688	72	42	14.4232	204	140	194	158
C620CE	2021-05-18	Europe	Germany	51.024800000	9.156533333	Crop	Triticum_aestivum_-Wheat-	Temperate_deciduous_forest	Temperate	No_data	No_data	No_data	8.28333	8.2	32.6693	633.189	22.4	-2.7	25.1	14.7333	3.96667	16.2333	0.666667	688	72	42	14.4232	204	140	194	158
C620CF	2021-05-18	Europe	Germany	51.024800000	9.156533333	Crop	Triticum_aestivum_-Wheat-	Temperate_deciduous_forest	Temperate	No_data	No_data	No_data	8.28333	8.2	32.6693	633.189	22.4	-2.7	25.1	14.7333	3.96667	16.2333	0.666667	688	72	42	14.4232	204	140	194	158
C620CG	2021-05-18	Europe	Germany	51.024800000	9.156533333	Crop	Triticum_aestivum_-Wheat-	Temperate_deciduous_forest	Temperate	No_data	No_data	No_data	8.28333	8.2	32.6693	633.189	22.4	-2.7	25.1	14.7333	3.96667	16.2333	0.666667	688	72	42	14.4232	204	140	194	158
C620C2	2021-05-18	Europe	Germany	51.053508333	9.177105556	Crop	Zea_mays_-Corn-	Temperate_deciduous_forest	Temperate	No_data	No_data	No_data	8.5875	8.34167	32.971	633.852	22.7	-2.6	25.3	15	4.3	16.5333	0.933333	646	71	38	16.493	198	130	188	142
C620C3	2021-05-18	Europe	Germany	51.028772222	9.162266667	Crop	Zea_mays_-Corn-	Temperate_deciduous_forest	Temperate	No_data	No_data	No_data	8.35	8.3	32.9365	634.139	22.5	-2.7	25.2	14.7833	4.01667	16.3167	0.733333	678	71	41	14.5789	202	139	191	154
C620C4	2021-05-18	Europe	Germany	51.028772222	9.162266667	Crop	Zea_mays_-Corn-	Temperate_deciduous_forest	Temperate	No_data	No_data	No_data	8.35	8.3	32.9365	634.139	22.5	-2.7	25.2	14.7833	4.01667	16.3167	0.733333	678	71	41	14.5789	202	139	191	154
C620C5	2021-05-18	Europe	Germany	51.028772222	9.162266667	Crop	Zea_mays_-Corn-	Temperate_deciduous_forest	Temperate	No_data	No_data	No_data	8.35	8.3	32.9365	634.139	22.5	-2.7	25.2	14.7833	4.01667	16.3167	0.733333	678	71	41	14.5789	202	139	191	154
C620C6	2021-05-18	Europe	Germany	51.028772222	9.162266667	Crop	Zea_mays_-Corn-	Temperate_deciduous_forest	Temperate	No_data	No_data	No_data	8.35	8.3	32.9365	634.139	22.5	-2.7	25.2	14.7833	4.01667	16.3167	0.733333	678	71	41	14.5789	202	139	191	154
C620C7	2021-05-18	Europe	Germany	51.028772222	9.162266667	Crop	Zea_mays_-Corn-	Temperate_deciduous_forest	Temperate	No_data	No_data	No_data	8.35	8.3	32.9365	634.139	22.5	-2.7	25.2	14.7833	4.01667	16.3167	0.733333	678	71	41	14.5789	202	139	191	154
C620C8	2021-05-18	Europe	Germany	51.028772222	9.162266667	Crop	Zea_mays_-Corn-	Temperate_deciduous_forest	Temperate	No_data	No_data	No_data	8.35	8.3	32.9365	634.139	22.5	-2.7	25.2	14.7833	4.01667	16.3167	0.733333	678	71	41	14.5789	202	139	191	154
C620C9	2021-05-18	Europe	Germany	51.028772222	9.162266667	Crop	Zea_mays_-Corn-	Temperate_deciduous_forest	Temperate	No_data	No_data	No_data	8.35	8.3	32.9365	634.139	22.5	-2.7	25.2	14.7833	4.01667	16.3167	0.733333	678	71	41	14.5789	202	139	191	154
C620CA	2021-05-18	Europe	Germany	51.028772222	9.162266667	Crop	Zea_mays_-Corn-	Temperate_deciduous_forest	Temperate	No_data	No_data	No_data	8.35	8.3	32.9365	634.139	22.5	-2.7	25.2	14.7833	4.01667	16.3167	0.733333	678	71	41	14.5789	202	139	191	154
C620CB	2021-05-18	Europe	Germany	51.028772222	9.162266667	Crop	Zea_mays_-Corn-	Temperate_deciduous_forest	Temperate	No_data	No_data	No_data	8.35	8.3	32.9365	634.139	22.5	-2.7	25.2	14.7833	4.01667	16.3167	0.733333	678	71	41	14.5789	202	139	191	154
C620CM	2021-05-18	Europe	Germany	51.022075000	9.151780556	Crop	Lupinus_spp._-Lupine-	Temperate_deciduous_forest	Temperate	No_data	No_data	No_data	8.28333	8.2	32.6693	633.189	22.4	-2.7	25.1	14.7333	3.96667	16.2333	0.666667	688	72	42	14.4232	204	140	194	158
C620CN	2021-05-18	Europe	Germany	51.048111111	9.156586111	Crop	Lupinus_spp._-Lupine-	Temperate_deciduous_forest	Temperate	No_data	No_data	No_data	8.24583	8.15833	32.5033	633.211	22.3	-2.8	25.1	14.6833	3.91667	16.2	0.633333	693	72	43	13.9065	204	143	194	160
C620CO	2021-05-18	Europe	Germany	51.048111111	9.156586111	Crop	Lupinus_spp._-Lupine-	Temperate_deciduous_forest	Temperate	No_data	No_data	No_data	8.24583	8.15833	32.5033	633.211	22.3	-2.8	25.1	14.6833	3.91667	16.2	0.633333	693	72	43	13.9065	204	143	194	160
C620CP	2021-05-18	Europe	Germany	51.048111111	9.156586111	Crop	Lupinus_spp._-Lupine-	Temperate_deciduous_forest	Temperate	No_data	No_data	No_data	8.24583	8.15833	32.5033	633.211	22.3	-2.8	25.1	14.6833	3.91667	16.2	0.633333	693	72	43	13.9065	204	143	194	160
C620CQ	2021-05-18	Europe	Germany	51.048111111	9.156586111	Crop	Lupinus_spp._-Lupine-	Temperate_deciduous_forest	Temperate	No_data	No_data	No_data	8.24583	8.15833	32.5033	633.211	22.3	-2.8	25.1	14.6833	3.91667	16.2	0.633333	693	72	43	13.9065	204	143	194	160
C620CR	2021-05-18	Europe	Germany	51.048111111	9.156586111	Crop	Lupinus_spp._-Lupine-	Temperate_deciduous_forest	Temperate	No_data	No_data	No_data	8.24583	8.15833	32.5033	633.211	22.3	-2.8	25.1	14.6833	3.91667	16.2	0.633333	693	72	43	13.9065	204	143	194	160
C620CH	2021-05-18	Europe	Germany	51.024800000	9.156533333	Crop	Trifolium_spp._-Clover-	Temperate_deciduous_forest	Temperate	No_data	No_data	No_data	8.28333	8.2	32.6693	633.189	22.4	-2.7	25.1	14.7333	3.96667	16.2333	0.666667	688	72	42	14.4232	204	140	194	158
C620CI	2021-05-18	Europe	Germany	51.022075000	9.151780556	Crop	Trifolium_spp._-Clover-	Temperate_deciduous_forest	Temperate	No_data	No_data	No_data	8.28333	8.2	32.6693	633.189	22.4	-2.7	25.1	14.7333	3.96667	16.2333	0.666667	688	72	42	14.4232	204	140	194	158
C620CJ	2021-05-18	Europe	Germany	51.022075000	9.151780556	Crop	Trifolium_spp._-Clover-	Temperate_deciduous_forest	Temperate	No_data	No_data	No_data	8.28333	8.2	32.6693	633.189	22.4	-2.7	25.1	14.7333	3.96667	16.2333	0.666667	688	72	42	14.4232	204	140	194	158
C620CK	2021-05-18	Europe	Germany	51.022075000	9.151780556	Crop	Trifolium_spp._-Clover-	Temperate_deciduous_forest	Temperate	No_data	No_data	No_data	8.28333	8.2	32.6693	633.189	22.4	-2.7	25.1	14.7333	3.96667	16.2333	0.666667	688	72	42	14.4232	204	140	194	158
C620CL	2021-05-18	Europe	Germany	51.022075000	9.151780556	Crop	Trifolium_spp._-Clover-	Temperate_deciduous_forest	Temperate	No_data	No_data	No_data	8.28333	8.2	32.6693	633.189	22.4	-2.7	25.1	14.7333	3.96667	16.2333	0.666667	688	72	42	14.4232	204	140	194	158
C620BY	2021-05-18	Europe	Germany	51.053508333	9.177105556	Crop	Solanum_tuberosum_-Potato-	Temperate_deciduous_forest	Temperate	No_data	No_data	No_data	8.5875	8.34167	32.971	633.852	22.7	-2.6	25.3	15	4.3	16.5333	0.933333	646	71	38	16.493	198	130	188	142
C620BZ	2021-05-18	Europe	Germany	51.053508333	9.177105556	Crop	Solanum_tuberosum_-Potato-	Temperate_deciduous_forest	Temperate	No_data	No_data	No_data	8.5875	8.34167	32.971	633.852	22.7	-2.6	25.3	15	4.3	16.5333	0.933333	646	71	38	16.493	198	130	188	142
C620C0	2021-05-18	Europe	Germany	51.053508333	9.177105556	Crop	Solanum_tuberosum_-Potato-	Temperate_deciduous_forest	Temperate	No_data	No_data	No_data	8.5875	8.34167	32.971	633.852	22.7	-2.6	25.3	15	4.3	16.5333	0.933333	646	71	38	16.493	198	130	188	142
C620C1	2021-05-18	Europe	Germany	51.053508333	9.177105556	Crop	Solanum_tuberosum_-Potato-	Temperate_deciduous_forest	Temperate	No_data	No_data	No_data	8.5875	8.34167	32.971	633.852	22.7	-2.6	25.3	15	4.3	16.5333	0.933333	646	71	38	16.493	198	130	188	142
C620K0	2021-06-14	Europe	Greece	40.7014	21.70979	Crop	Vitis_vinifera_-Vine-	Mediterranean_forest	Mediterranean	No_data	No_data	No_data	12.1125	11.1583	34.8698	783.756	29.6	-2.4	32	7.58333	21.1333	21.7833	2.48333	561	69	34	23.459	185	105	108	137
C620K1	2021-06-15	Europe	Greece	40.72453	21.72293	Crop	Vitis_vinifera_-Vine-	Mediterranean_forest	Mediterranean	No_data	No_data	No_data	12.1667	10.9833	34.4305	785.344	29.6	-2.3	31.9	7.65	21.2167	21.85	2.51667	559	68	34	22.7842	183	105	109	136
C620K2	2021-06-16	Europe	Greece	40.70376	21.71899	Crop	Vitis_vinifera_-Vine-	Mediterranean_forest	Mediterranean	No_data	No_data	No_data	11.9917	11.0667	34.8008	779.877	29.4	-2.4	31.8	7.48333	20.9833	21.6167	2.43333	565	68	35	22.4599	184	107	111	137
C620K3	2021-06-17	Europe	Greece	40.69183	21.72295	Crop	Vitis_vinifera_-Vine-	Mediterranean_forest	Mediterranean	No_data	No_data	No_data	11.8292	11.1583	35.1998	775.026	29.2	-2.5	31.7	7.35	20.7833	21.4	2.35	564	68	35	21.9762	183	108	111	137
C620K4	2021-06-18	Europe	Greece	40.69301	21.72376	Crop	Vitis_vinifera_-Vine-	Mediterranean_forest	Mediterranean	No_data	No_data	No_data	11.8292	11.1583	35.1998	775.026	29.2	-2.5	31.7	7.35	20.7833	21.4	2.35	564	68	35	21.9762	183	108	111	137
C620K5	2021-06-19	Europe	Greece	40.64174	21.69297	Crop	Vitis_vinifera_-Vine-	Mediterranean_forest	Mediterranean	No_data	No_data	No_data	12.0542	11.7083	36.5885	771.614	29.6	-2.4	32	7.53333	20.9667	21.5667	2.6	577	70	35	22.9097	190	109	111	142
C620K6	2021-06-20	Europe	Greece	40.6433	21.48842	Crop	Vaccinium_corymbosum_-Blueberry-	Mediterranean_forest	Mediterranean	No_data	No_data	No_data	7.65	9.18333	34.2662	662.005	22.5	-4.3	26.8	4.43333	15.8667	15.8667	-0.133333	742	83	43	21.8727	233	134	134	192
C620K7	2021-06-21	Europe	Greece	40.66149	22.07012	Crop	Vitis_vinifera_-Vine-	Mediterranean_forest	Mediterranean	No_data	No_data	No_data	13.8375	10.5917	33.6243	778.349	30.8	-0.7	31.5	9.35	22.8167	23.45	4.25	467	55	26	23.096	150	85	89	113
C620K8	2021-06-22	Europe	Greece	40.64149	22.06012	Crop	Vitis_vinifera_-Vine-	Mediterranean_forest	Mediterranean	No_data	No_data	No_data	13.1875	10.1917	33.3061	766.945	29.7	-0.9	30.6	8.81667	22.0167	22.65	3.75	477	55	28	22.0766	149	90	95	110
C620K9	2021-06-23	Europe	Greece	40.65916	22.06823	Crop	Vitis_vinifera_-Vine-	Mediterranean_forest	Mediterranean	No_data	No_data	No_data	13.8375	10.5917	33.6243	778.349	30.8	-0.7	31.5	9.35	22.8167	23.45	4.25	467	55	26	23.096	150	85	89	113
C6215W	2022-01-04	Europe	Greece	40.59608631	22.5006553	Crop	Actinidia_deliciosa_-Kiwi-	Mediterranean_forest	Mediterranean	Yes	Yes	Chemical	14.9458	11.2083	35.026	793.088	31.9	-0.1	32	10.2667	23.8167	24.6667	5.1	429	54	23	25.3707	141	74	79	108
C6216F	2022-01-04	Europe	Greece	40.59914085	22.4944791	Crop	Actinidia_deliciosa_-Kiwi-	Mediterranean_forest	Mediterranean	Yes	Yes	Chemical	14.95	11.2167	34.9429	793.691	32	-0.1	32.1	10.2667	23.8333	24.6833	5.1	429	54	23	25.3707	141	74	79	108
C6215Y	2022-01-04	Europe	Greece	40.62266049	22.3607554	Crop	Malus_domestica_-Apple-	Mediterranean_forest	Mediterranean	Yes	Yes	Chemical	15.05	11.7	36.3354	787.9	31.9	-0.3	32.2	10.3333	23.8	24.65	5.21667	433	54	23	25.3608	143	75	79	109
C6215Z	2022-01-04	Europe	Greece	39.81774361	22.3019165	Crop	Malus_domestica_-Apple-	Mediterranean_forest	Mediterranean	Yes	Yes	Chemical	15.1708	11.575	35.3976	785.975	33.3	0.6	32.7	10.9	25.1167	25.1167	5.78333	467	63	20	33.4316	166	67	67	132
C62167	2022-01-04	Europe	Greece	40.62155779	22.3617606	Crop	Malus_domestica_-Apple-	Mediterranean_forest	Mediterranean	Yes	Yes	Chemical	15.05	11.7	36.3354	787.9	31.9	-0.3	32.2	10.3333	23.8	24.65	5.21667	433	54	23	25.3608	143	75	79	109
C6216G	2022-01-04	Europe	Greece	39.81652581	22.3114306	Crop	Prunus_cerasus_-Cherry-	Mediterranean_forest	Mediterranean	Yes	Yes	Chemical	15.2667	11.6333	35.4675	788.645	33.4	0.6	32.8	10.9833	25.2333	25.2333	5.85	462	63	19	34.5692	166	64	64	132
C6215P	2022-01-04	Europe	Greece	39.81487167	22.3089864	Crop	Prunus_persica_-Peach-	Mediterranean_forest	Mediterranean	Yes	Yes	Chemical	15.2667	11.6333	35.4675	788.645	33.4	0.6	32.8	10.9833	25.2333	25.2333	5.85	462	63	19	34.5692	166	64	64	132
C6215S	2022-01-04	Europe	Greece	40.62302351	22.3613352	Crop	Prunus_persica_-Peach-	Mediterranean_forest	Mediterranean	Yes	Yes	Chemical	15.05	11.7	36.3354	787.9	31.9	-0.3	32.2	10.3333	23.8	24.65	5.21667	433	54	23	25.3608	143	75	79	109
C6215T	2022-01-04	Europe	Greece	40.62202032	22.3629591	Crop	Prunus_persica_-Peach-	Mediterranean_forest	Mediterranean	Yes	Yes	Chemical	15.05	11.7	36.3354	787.9	31.9	-0.3	32.2	10.3333	23.8	24.65	5.21667	433	54	23	25.3608	143	75	79	109
C6216A	2022-01-04	Europe	Greece	39.81302566	22.3082461	Crop	Prunus_persica_-Peach-	Mediterranean_forest	Mediterranean	Yes	Yes	Chemical	15.2708	11.6417	35.4929	787.125	33.4	0.6	32.8	10.9833	25.2167	25.2167	5.86667	463	64	19	35.096	168	64	64	133
C6216D	2022-01-04	Europe	Greece	39.81852909	22.3023272	Crop	Pyrus_communis_-Pear-	Mediterranean_forest	Mediterranean	Yes	Yes	Chemical	15.1708	11.575	35.3976	785.975	33.3	0.6	32.7	10.9	25.1167	25.1167	5.78333	467	63	20	33.4316	166	67	67	132
C6216E	2022-01-04	Europe	Greece	39.81767855	22.3034216	Crop	Pyrus_communis_-Pear-	Mediterranean_forest	Mediterranean	Yes	Yes	Chemical	15.1708	11.575	35.3976	785.975	33.3	0.6	32.7	10.9	25.1167	25.1167	5.78333	467	63	20	33.4316	166	67	67	132
C6215Q	2022-01-04	Europe	Greece	39.81309941	22.3076727	Crop	Prunus_dulcis_-Almond-	Mediterranean_forest	Mediterranean	Yes	Yes	Chemical	15.2708	11.6417	35.4929	787.125	33.4	0.6	32.8	10.9833	25.2167	25.2167	5.86667	463	64	19	35.096	168	64	64	133
C6216B	2022-01-04	Europe	Greece	39.81525749	22.3101138	Crop	Prunus_dulcis_-Almond-	Mediterranean_forest	Mediterranean	Yes	Yes	Chemical	15.2667	11.6333	35.4675	788.645	33.4	0.6	32.8	10.9833	25.2333	25.2333	5.85	462	63	19	34.5692	166	64	64	132
C6215V	2022-01-04	Europe	Greece	40.59684022	22.4983082	Crop	Vitis_vinifera_-Vine-	Mediterranean_forest	Mediterranean	Yes	No	No_data	14.95	11.2167	34.9429	793.691	32	-0.1	32.1	10.2667	23.8333	24.6833	5.1	429	54	23	25.3707	141	74	79	108
C6215X	2022-01-04	Europe	Greece	39.81577996	22.3122988	Crop	Vitis_vinifera_-Vine-	Mediterranean_forest	Mediterranean	Yes	Yes	Chemical	15.2667	11.6333	35.4675	788.645	33.4	0.6	32.8	10.9833	25.2333	25.2333	5.85	462	63	19	34.5692	166	64	64	132
C62161	2022-01-04	Europe	Greece	40.62260579	22.3605316	Crop	Vitis_vinifera_-Vine-	Mediterranean_forest	Mediterranean	Yes	No	No_data	15.05	11.7	36.3354	787.9	31.9	-0.3	32.2	10.3333	23.8	24.65	5.21667	433	54	23	25.3608	143	75	79	109
C62162	2022-01-04	Europe	Greece	40.59746342	22.4991236	Crop	Vitis_vinifera_-Vine-	Mediterranean_forest	Mediterranean	Yes	No	No_data	14.95	11.2167	34.9429	793.691	32	-0.1	32.1	10.2667	23.8333	24.6833	5.1	429	54	23	25.3707	141	74	79	108
C62168	2022-01-04	Europe	Greece	40.62144838	22.361571	Crop	Vitis_vinifera_-Vine-	Mediterranean_forest	Mediterranean	Yes	No	No_data	15.05	11.7	36.3354	787.9	31.9	-0.3	32.2	10.3333	23.8	24.65	5.21667	433	54	23	25.3608	143	75	79	109
C6216H	2022-01-04	Europe	Greece	39.81536416	22.3136748	Crop	Vitis_vinifera_-Vine-	Mediterranean_forest	Mediterranean	No_data	No_data	No_data	15.2667	11.6333	35.4675	788.645	33.4	0.6	32.8	10.9833	25.2333	25.2333	5.85	462	63	19	34.5692	166	64	64	132
C62163	2022-01-05	Europe	Greece	38.69542695	23.0364012	Crop	Olea_europea_-Olive-	Mediterranean_forest	Mediterranean	Yes	Yes	Chemical	16.6292	9.70833	35.303	680.963	32	4.5	27.5	10.25	25.3333	25.3333	8.8	542	89	9	58.4862	226	39	39	219
C62169	2022-01-05	Europe	Greece	38.69533065	23.0383593	Crop	Olea_europea_-Olive-	Mediterranean_forest	Mediterranean	Yes	Yes	Chemical	16.6292	9.70833	35.303	680.963	32	4.5	27.5	10.25	25.3333	25.3333	8.8	542	89	9	58.4862	226	39	39	219
C6215O	2022-01-05	Europe	Greece	38.69710256	23.036815	Crop	Pistaccia_vera_-Pistachio-	Mediterranean_forest	Mediterranean	Yes	Yes	Chemical	16.6292	9.70833	35.303	680.963	32	4.5	27.5	10.25	25.3333	25.3333	8.8	542	89	9	58.4862	226	39	39	219
C6216C	2022-01-05	Europe	Greece	38.69628722	23.0369669	Crop	Pistaccia_vera_-Pistachio-	Mediterranean_forest	Mediterranean	Yes	Yes	Chemical	16.6292	9.70833	35.303	680.963	32	4.5	27.5	10.25	25.3333	25.3333	8.8	542	89	9	58.4862	226	39	39	219
C6215R	2022-01-05	Europe	Greece	38.67550392	23.020337	Crop	Vitis_vinifera_-Vine-	Mediterranean_forest	Mediterranean	Yes	Yes	Chemical	16.6375	9.85833	35.3345	686.404	32.2	4.3	27.9	10.1667	25.4167	25.4167	8.71667	546	89	9	58.4038	228	39	39	220
C62160	2022-01-05	Europe	Greece	38.67255926	23.0246305	Crop	Vitis_vinifera_-Vine-	Mediterranean_forest	Mediterranean	Yes	Yes	Chemical	16.65	9.81667	35.1852	688.011	32.2	4.3	27.9	10.15	25.45	25.45	8.7	545	90	8	58.9037	228	38	38	221
C62164	2022-01-05	Europe	Greece	38.67457275	23.0251829	Crop	Vitis_vinifera_-Vine-	Mediterranean_forest	Mediterranean	Yes	Yes	Chemical	16.7	9.75	35.0719	686.622	32.2	4.4	27.8	13.45	25.4833	25.4833	8.76667	542	89	8	58.8207	226	38	38	219
C62166	2022-01-05	Europe	Greece	38.67330432	23.0196973	Crop	Vitis_vinifera_-Vine-	Mediterranean_forest	Mediterranean	Yes	Yes	Chemical	16.65	9.81667	35.1852	688.011	32.2	4.3	27.9	10.15	25.45	25.45	8.7	545	90	8	58.9037	228	38	38	221
C620R0	2021-06-06	Europe	Italy	36.804263889	11.937302778	Crop	Vitis_vinifera_-Vine-	Mediterranean_forest	Mediterranean	No	No	No_data	18.3333	5.58333	29.2321	505.548	29.1	10	19.1	14.35	24.3667	24.8833	12.7	446	75	2	70.6747	207	9	50	148
C620R1	2021-06-06	Europe	Italy	36.821880556	11.976091667	Crop	Vitis_vinifera_-Vine-	Mediterranean_forest	Mediterranean	Yes	Yes	Chemical	18.1958	5.45833	28.5777	511.208	29	9.9	19.1	14.1167	24.3333	24.8	12.5	455	77	2	70.0245	210	10	51	150
C620PF	2021-06-21	Europe	Italy	44.697825000	7.608452778	Crop	Secale_cereale_-Rye-	Mediterranean_forest	Mediterranean	Yes	Yes	Organic	12.8917	8.38333	30.7082	708.246	27	-0.3	27.3	16.2333	4.18333	21.65	4.18333	707	90	35	30.0709	227	125	154	125
C620P8	2021-06-21	Europe	Italy	44.695013889	7.607705556	Crop	Zea_mays_-Corn-	Temperate_deciduous_forest	Temperate	Yes	Yes	Organic	12.8792	8.40833	30.6873	707.776	27	-0.4	27.4	16.2167	4.16667	21.6167	4.16667	709	90	35	30.0629	228	125	155	125
C620PK	2021-06-21	Europe	Italy	44.679927778	7.624858333	Crop	Mediago_sativa_-Alfalfa-	Temperate_deciduous_forest	Temperate	Yes	Yes	Organic	12.9083	8.31667	30.3528	708.304	27.1	-0.3	27.4	16.2333	4.2	21.6833	4.2	708	90	34	30.4843	227	125	153	125
C620PL	2021-06-21	Europe	Italy	44.698277778	7.606580556	Natural	Pasture	Temperate_deciduous_forest	Temperate	Yes	Yes	Organic	12.8792	8.40833	30.6873	707.776	27	-0.4	27.4	16.2167	4.16667	21.6167	4.16667	709	90	35	30.0629	228	125	155	125
C620PA	2021-06-30	Europe	Italy	45.156944444	7.010555556	Crop	Triticum_aestivum_-Wheat-	Temperate_deciduous_forest	Temperate	No	No	No_data	10.4708	9.975	35.7527	670.581	25.7	-2.2	27.9	13.3667	3.75	18.8667	2.45	834	90	56	16.3918	240	175	202	183
C620P1	2021-06-30	Europe	Italy	44.698277778	7.606580556	Crop	Prunus_persica_-Peach-	Mediterranean_forest	Mediterranean	Yes	No	No_data	12.8792	8.40833	30.6873	707.776	27	-0.4	27.4	16.2167	4.16667	21.6167	4.16667	709	90	35	30.0629	228	125	155	125
C620PG	2021-06-30	Europe	Italy	45.156944444	7.010555556	Crop	Capsicum_annuum_-Pepper_sweet-	Temperate_deciduous_forest	Temperate	No	Yes	Organic	10.4708	9.975	35.7527	670.581	25.7	-2.2	27.9	13.3667	3.75	18.8667	2.45	834	90	56	16.3918	240	175	202	183
C620PE	2021-06-30	Europe	Italy	45.156944444	7.010555556	Crop	Cucumis_sativus_-Cucumber-	Temperate_deciduous_forest	Temperate	No	Yes	Organic	10.4708	9.975	35.7527	670.581	25.7	-2.2	27.9	13.3667	3.75	18.8667	2.45	834	90	56	16.3918	240	175	202	183
C620PO	2021-06-30	Europe	Italy	45.156944444	7.010555556	Crop	Foeniculum_vulgare_-Fennel-	Temperate_deciduous_forest	Temperate	No	Yes	Organic	10.4708	9.975	35.7527	670.581	25.7	-2.2	27.9	13.3667	3.75	18.8667	2.45	834	90	56	16.3918	240	175	202	183
C620P6	2021-06-30	Europe	Italy	44.698277778	7.606580556	Crop	Solanum_tuberosum_-Potato-	Temperate_deciduous_forest	Temperate	Yes	Yes	Organic	12.8792	8.40833	30.6873	707.776	27	-0.4	27.4	16.2167	4.16667	21.6167	4.16667	709	90	35	30.0629	228	125	155	125
C620P9	2021-06-30	Europe	Italy	45.156944444	7.010555556	Crop	Solanum_tuberosum_-Potato-	Temperate_deciduous_forest	Temperate	No	Yes	Organic	10.4708	9.975	35.7527	670.581	25.7	-2.2	27.9	13.3667	3.75	18.8667	2.45	834	90	56	16.3918	240	175	202	183
C620PC	2021-06-30	Europe	Italy	45.156944444	7.010555556	Crop	Solanum_tuberosum_-Potato-	Temperate_deciduous_forest	Temperate	Yes	Yes	Organic	10.4708	9.975	35.7527	670.581	25.7	-2.2	27.9	13.3667	3.75	18.8667	2.45	834	90	56	16.3918	240	175	202	183
C620PM	2021-06-30	Europe	Italy	45.156944444	7.010555556	Crop	Solanum_tuberosum_-Potato-	Temperate_deciduous_forest	Temperate	No	Yes	Organic	10.4708	9.975	35.7527	670.581	25.7	-2.2	27.9	13.3667	3.75	18.8667	2.45	834	90	56	16.3918	240	175	202	183
C620PT	2021-07-04	Europe	Italy	45.496422222	12.041997222	Crop	Asparagus_officinalis	Temperate_deciduous_forest	Temperate	Yes	Yes	Organic	13.0583	8.96667	30.8133	763.401	28.3	-0.8	29.1	16.9	5.23333	22.4	3.63333	843	90	48	17.5515	243	166	225	173
C620PQ	2021-07-04	Europe	Italy	45.496422222	12.041997222	Crop	Asparagus_officinalis	Temperate_deciduous_forest	Temperate	Yes	Yes	Organic	13.0583	8.96667	30.8133	763.401	28.3	-0.8	29.1	16.9	5.23333	22.4	3.63333	843	90	48	17.5515	243	166	225	173
C620PD	2021-07-04	Europe	Italy	45.555527778	12.052305556	Crop	Brassica_oleracea_-Cabbage-	Temperate_deciduous_forest	Temperate	Yes	Yes	Organic	13.025	9.2	31.2925	763.84	28.4	-1	29.4	16.8667	5.2	22.3833	3.58333	871	93	49	18.3382	253	168	234	174
C620PP	2021-07-04	Europe	Italy	45.556638889	12.050527778	Crop	Brassica_oleracea_-Cabbage-	Temperate_deciduous_forest	Temperate	Yes	Yes	Organic	13.025	9.2	31.2925	763.84	28.4	-1	29.4	16.8667	5.2	22.3833	3.58333	871	93	49	18.3382	253	168	234	174
C620UA	2021-07-05	Europe	Italy	41.631111111	12.752777778	Crop	Actinidia_deliciosa_-Kiwi-	Mediterranean_forest	Mediterranean	No	Yes	Organic	15.5875	10.0417	37.3296	619.179	30.6	3.7	26.9	12.6	23.4667	23.4667	8.55	930	136	21	45.2559	365	93	93	296
C620UB	2021-07-05	Europe	Italy	41.631111111	12.752777778	Crop	Actinidia_deliciosa_-Kiwi-	Mediterranean_forest	Mediterranean	No	Yes	Organic	15.5875	10.0417	37.3296	619.179	30.6	3.7	26.9	12.6	23.4667	23.4667	8.55	930	136	21	45.2559	365	93	93	296
C620UC	2021-07-05	Europe	Italy	41.631111111	12.752777778	Crop	Actinidia_deliciosa_-Kiwi-	Mediterranean_forest	Mediterranean	No	Yes	Organic	15.5875	10.0417	37.3296	619.179	30.6	3.7	26.9	12.6	23.4667	23.4667	8.55	930	136	21	45.2559	365	93	93	296
C620UD	2021-07-05	Europe	Italy	41.631111111	12.752777778	Crop	Actinidia_deliciosa_-Kiwi-	Mediterranean_forest	Mediterranean	No	Yes	Organic	15.5875	10.0417	37.3296	619.179	30.6	3.7	26.9	12.6	23.4667	23.4667	8.55	930	136	21	45.2559	365	93	93	296
C620UE	2021-07-05	Europe	Italy	41.631111111	12.752777778	Crop	Actinidia_deliciosa_-Kiwi-	Mediterranean_forest	Mediterranean	No	Yes	Organic	15.5875	10.0417	37.3296	619.179	30.6	3.7	26.9	12.6	23.4667	23.4667	8.55	930	136	21	45.2559	365	93	93	296
C620UF	2021-07-05	Europe	Italy	41.631111111	12.752777778	Crop	Actinidia_deliciosa_-Kiwi-	Mediterranean_forest	Mediterranean	No	Yes	Organic	15.5875	10.0417	37.3296	619.179	30.6	3.7	26.9	12.6	23.4667	23.4667	8.55	930	136	21	45.2559	365	93	93	296
C620UG	2021-07-05	Europe	Italy	41.631111111	12.752777778	Crop	Actinidia_deliciosa_-Kiwi-	Mediterranean_forest	Mediterranean	No	Yes	Organic	15.5875	10.0417	37.3296	619.179	30.6	3.7	26.9	12.6	23.4667	23.4667	8.55	930	136	21	45.2559	365	93	93	296
C620UH	2021-07-05	Europe	Italy	41.631111111	12.752777778	Crop	Actinidia_deliciosa_-Kiwi-	Mediterranean_forest	Mediterranean	No	Yes	Organic	15.5875	10.0417	37.3296	619.179	30.6	3.7	26.9	12.6	23.4667	23.4667	8.55	930	136	21	45.2559	365	93	93	296
C620UJ	2021-07-05	Europe	Italy	41.631111111	12.752777778	Crop	Actinidia_deliciosa_-Kiwi-	Mediterranean_forest	Mediterranean	No	Yes	Organic	15.5875	10.0417	37.3296	619.179	30.6	3.7	26.9	12.6	23.4667	23.4667	8.55	930	136	21	45.2559	365	93	93	296
C620UK	2021-07-05	Europe	Italy	41.631111111	12.752777778	Crop	Actinidia_deliciosa_-Kiwi-	Mediterranean_forest	Mediterranean	No	Yes	Organic	15.5875	10.0417	37.3296	619.179	30.6	3.7	26.9	12.6	23.4667	23.4667	8.55	930	136	21	45.2559	365	93	93	296
C620TV	2021-07-05	Europe	Italy	41.631111111	12.752777778	Natural	Pasture	Mediterranean_forest	Mediterranean	No	No	No_data	15.5875	10.0417	37.3296	619.179	30.6	3.7	26.9	12.6	23.4667	23.4667	8.55	930	136	21	45.2559	365	93	93	296
C620TW	2021-07-05	Europe	Italy	41.631111111	12.752777778	Natural	Pasture	Mediterranean_forest	Mediterranean	No	No	No_data	15.5875	10.0417	37.3296	619.179	30.6	3.7	26.9	12.6	23.4667	23.4667	8.55	930	136	21	45.2559	365	93	93	296
C620TX	2021-07-05	Europe	Italy	41.631111111	12.752777778	Natural	Pasture	Mediterranean_forest	Mediterranean	No	No	No_data	15.5875	10.0417	37.3296	619.179	30.6	3.7	26.9	12.6	23.4667	23.4667	8.55	930	136	21	45.2559	365	93	93	296
C620TY	2021-07-05	Europe	Italy	41.631111111	12.752777778	Natural	Pasture	Mediterranean_forest	Mediterranean	No	No	No_data	15.5875	10.0417	37.3296	619.179	30.6	3.7	26.9	12.6	23.4667	23.4667	8.55	930	136	21	45.2559	365	93	93	296
C620TZ	2021-07-05	Europe	Italy	41.631111111	12.752777778	Natural	Pasture	Mediterranean_forest	Mediterranean	No	No	No_data	15.5875	10.0417	37.3296	619.179	30.6	3.7	26.9	12.6	23.4667	23.4667	8.55	930	136	21	45.2559	365	93	93	296
C620UI	2021-07-05	Europe	Italy	41.631111111	12.752777778	Crop	Vitis_vinifera_-Vine-	Mediterranean_forest	Mediterranean	No	Yes	Chemical	15.5875	10.0417	37.3296	619.179	30.6	3.7	26.9	12.6	23.4667	23.4667	8.55	930	136	21	45.2559	365	93	93	296
C620UL	2021-07-05	Europe	Italy	41.631111111	12.752777778	Crop	Vitis_vinifera_-Vine-	Mediterranean_forest	Mediterranean	No	Yes	Chemical	15.5875	10.0417	37.3296	619.179	30.6	3.7	26.9	12.6	23.4667	23.4667	8.55	930	136	21	45.2559	365	93	93	296
C620UM	2021-07-05	Europe	Italy	41.631111111	12.752777778	Crop	Vitis_vinifera_-Vine-	Mediterranean_forest	Mediterranean	No	Yes	Chemical	15.5875	10.0417	37.3296	619.179	30.6	3.7	26.9	12.6	23.4667	23.4667	8.55	930	136	21	45.2559	365	93	93	296
C620UN	2021-07-05	Europe	Italy	41.631111111	12.752777778	Crop	Vitis_vinifera_-Vine-	Mediterranean_forest	Mediterranean	No	Yes	Chemical	15.5875	10.0417	37.3296	619.179	30.6	3.7	26.9	12.6	23.4667	23.4667	8.55	930	136	21	45.2559	365	93	93	296
C620UO	2021-07-05	Europe	Italy	41.631111111	12.752777778	Crop	Vitis_vinifera_-Vine-	Mediterranean_forest	Mediterranean	No	Yes	Chemical	15.5875	10.0417	37.3296	619.179	30.6	3.7	26.9	12.6	23.4667	23.4667	8.55	930	136	21	45.2559	365	93	93	296
C620U5	2021-07-06	Europe	Italy	41.755333333	13.029333333	Crop	Actinidia_deliciosa_-Kiwi-	Shrublands	Shrublands	Yes	No_data	No_data	14.4792	10.725	36.9828	662.284	30.8	1.8	29	11	22.9167	22.9167	6.86667	1011	147	36	39.2827	389	131	131	297
C620U6	2021-07-06	Europe	Italy	41.755333333	13.029333333	Crop	Actinidia_deliciosa_-Kiwi-	Shrublands	Shrublands	Yes	No_data	No_data	14.4792	10.725	36.9828	662.284	30.8	1.8	29	11	22.9167	22.9167	6.86667	1011	147	36	39.2827	389	131	131	297
C620U7	2021-07-06	Europe	Italy	41.755333333	13.029333333	Crop	Actinidia_deliciosa_-Kiwi-	Shrublands	Shrublands	Yes	No_data	No_data	14.4792	10.725	36.9828	662.284	30.8	1.8	29	11	22.9167	22.9167	6.86667	1011	147	36	39.2827	389	131	131	297
C620U8	2021-07-06	Europe	Italy	41.755333333	13.029333333	Crop	Actinidia_deliciosa_-Kiwi-	Shrublands	Shrublands	Yes	No_data	No_data	14.4792	10.725	36.9828	662.284	30.8	1.8	29	11	22.9167	22.9167	6.86667	1011	147	36	39.2827	389	131	131	297
C620U9	2021-07-06	Europe	Italy	41.755333333	13.029333333	Crop	Actinidia_deliciosa_-Kiwi-	Shrublands	Shrublands	Yes	No_data	No_data	14.4792	10.725	36.9828	662.284	30.8	1.8	29	11	22.9167	22.9167	6.86667	1011	147	36	39.2827	389	131	131	297
C620U0	2021-07-06	Europe	Italy	41.754805556	13.029527778	Crop	Prunus_persica_-Peach-	Shrublands	Shrublands	Yes	Yes	Organic	14.4792	10.725	36.9828	662.284	30.8	1.8	29	11	22.9167	22.9167	6.86667	1011	147	36	39.2827	389	131	131	297
C620U1	2021-07-06	Europe	Italy	41.754805556	13.029527778	Crop	Prunus_persica_-Peach-	Shrublands	Shrublands	Yes	Yes	Organic	14.4792	10.725	36.9828	662.284	30.8	1.8	29	11	22.9167	22.9167	6.86667	1011	147	36	39.2827	389	131	131	297
C620U2	2021-07-06	Europe	Italy	41.754805556	13.029527778	Crop	Prunus_persica_-Peach-	Shrublands	Shrublands	Yes	Yes	Organic	14.4792	10.725	36.9828	662.284	30.8	1.8	29	11	22.9167	22.9167	6.86667	1011	147	36	39.2827	389	131	131	297
C620U3	2021-07-06	Europe	Italy	41.754805556	13.029527778	Crop	Prunus_persica_-Peach-	Shrublands	Shrublands	Yes	Yes	Organic	14.4792	10.725	36.9828	662.284	30.8	1.8	29	11	22.9167	22.9167	6.86667	1011	147	36	39.2827	389	131	131	297
C620U4	2021-07-06	Europe	Italy	41.754805556	13.029527778	Crop	Prunus_persica_-Peach-	Shrublands	Shrublands	Yes	Yes	Organic	14.4792	10.725	36.9828	662.284	30.8	1.8	29	11	22.9167	22.9167	6.86667	1011	147	36	39.2827	389	131	131	297
C620P7	2021-07-07	Europe	Italy	45.132500000	7.114166667	Crop	Helianthus_tuberosus_-Jerusalem_artichoke-	Temperate_deciduous_forest	Temperate	No	No	No_data	10.6708	9.39167	33.9049	681.714	25.7	-2	27.7	13.7	3.83333	19.2	2.46667	799	91	52	20.2925	243	158	197	162
C620RC	2021-07-09	Europe	Italy	37.193255556	14.556400000	Crop	Ficus_carica_-Fig-	Temperate_deciduous_forest	Temperate	Yes	Yes	Organic	15.6833	8.46667	35.8757	569.211	28.9	5.3	23.6	13.75	22.7333	22.95	9.41667	475	78	3	65.9963	218	20	49	152
C620RJ	2021-07-09	Europe	Italy	37.153050000	14.505036111	Crop	Ficus_carica_-Fig-	Mediterranean_forest	Mediterranean	Yes	Yes	Chemical	16.0792	8.525	36.4316	557.362	29.2	5.8	23.4	14.2333	22.9333	23.2	9.93333	457	77	3	67.1962	212	18	46	147
C620R2	2021-07-09	Europe	Italy	37.430038889	14.056180556	Crop	Olea_europea_-Olive-	Mediterranean_forest	Mediterranean	Yes	Yes	Chemical	16.2083	8.73333	36.3889	574.677	29.8	5.8	24	14.2833	23.3167	23.5833	9.91667	455	72	3	62.6116	203	20	48	142
C620RE	2021-07-09	Europe	Italy	37.429744444	14.056336111	Crop	Olea_europea_-Olive-	Mediterranean_forest	Mediterranean	Yes	Yes	Organic	16.2083	8.73333	36.3889	574.677	29.8	5.8	24	14.2833	23.3167	23.5833	9.91667	455	72	3	62.6116	203	20	48	142
C620RG	2021-07-09	Europe	Italy	37.166047222	14.539322222	Crop	Prunus_persica_-Peach-	Mediterranean_forest	Mediterranean	Yes	Yes	Chemical	15.7833	8.51667	36.2411	563.916	28.9	5.4	23.5	13.8667	22.75	22.9667	9.56667	471	78	3	66.3881	218	20	48	150
C620RN	2021-07-09	Europe	Italy	37.137638889	14.538522222	Crop	Prunus_persica_-Peach-	Mediterranean_forest	Mediterranean	Yes	Yes	Organic	16.0458	8.50833	36.5165	554.061	29	5.7	23.3	14.2167	22.85	23.1	9.9	460	77	3	67.014	214	19	46	146
C620PH	2021-07-10	Europe	Italy	45.132500000	7.114166667	Crop	Vitis_vinifera_-Vine-	Temperate_deciduous_forest	Temperate	No	No	No_data	10.6708	9.39167	33.9049	681.714	25.7	-2	27.7	13.7	3.83333	19.2	2.46667	799	91	52	20.2925	243	158	197	162
C620PN	2021-07-12	Europe	Italy	45.132500000	7.114166667	Crop	Actinidia_deliciosa_-Kiwi-	Mediterranean_forest	Mediterranean	No	No	No_data	10.6708	9.39167	33.9049	681.714	25.7	-2	27.7	13.7	3.83333	19.2	2.46667	799	91	52	20.2925	243	158	197	162
C620P4	2021-07-12	Europe	Italy	45.116666667	7.116666667	Crop	Castanea_sativa_-Chesnut-	Temperate_deciduous_forest	Temperate	No	No	No_data	9.80833	8.91667	33.2711	665.572	24.5	-2.3	26.8	12.6333	3.08333	18.1667	1.86667	823	91	54	17.8075	242	170	199	178
C620PB	2021-07-12	Europe	Italy	45.116666667	7.116666667	Crop	Castanea_sativa_-Chesnut-	Temperate_deciduous_forest	Temperate	No	No	No_data	9.80833	8.91667	33.2711	665.572	24.5	-2.3	26.8	12.6333	3.08333	18.1667	1.86667	823	91	54	17.8075	242	170	199	178
C620P0	2021-07-13	Europe	Italy	45.485358333	10.111880556	Crop	Secale_cereale_-Rye-	Mediterranean_forest	Mediterranean	Yes	Yes	Chemical	12.5833	9.5	30.8442	796.51	28.8	-2	30.8	18.2833	8.03333	22.3	2.66667	903	110	43	22.7163	283	172	239	173
C620P2	2021-07-13	Europe	Italy	45.484527778	10.110472222	Crop	Zea_mays_-Corn-	Mediterranean_forest	Mediterranean	Yes	Yes	Chemical	12.5833	9.5	30.8442	796.51	28.8	-2	30.8	18.2833	8.03333	22.3	2.66667	903	110	43	22.7163	283	172	239	173
C620P5	2021-07-13	Europe	Italy	45.511600000	10.068077778	Crop	Zea_mays_-Corn-	Mediterranean_forest	Mediterranean	Yes	Yes	Chemical	12.5083	9.55	31.3115	790.037	28.5	-2	30.5	18.2167	2.65	22.1	2.65	915	110	43	23.1378	287	171	244	171
C620PS	2021-07-13	Europe	Italy	45.509686111	10.066550000	Crop	Zea_mays_-Corn-	Mediterranean_forest	Mediterranean	Yes	Yes	Chemical	12.4917	9.53333	31.3596	788.983	28.4	-2	30.4	18.1833	2.63333	22.0667	2.63333	914	110	43	23.174	287	171	243	171
C620PJ	2021-07-13	Europe	Italy	45.481391667	10.105183333	Crop	Glycine_max_-Soybean-	Mediterranean_forest	Mediterranean	Yes	Yes	Chemical	12.5208	9.475	30.9641	792.672	28.6	-2	30.6	18.2	8	22.1667	2.61667	901	110	43	22.6369	282	173	236	173
C620P3	2021-07-13	Europe	Italy	45.555388889	12.050833333	Crop	Spinacia_oleracea_-Spinach-	Temperate_deciduous_forest	Temperate	Yes	Yes	Organic	13.025	9.2	31.2925	763.84	28.4	-1	29.4	16.8667	5.2	22.3833	3.58333	871	93	49	18.3382	253	168	234	174
C620PI	2021-07-13	Europe	Italy	45.476372222	10.153594444	Natural	Pasture	Temperate_deciduous_forest	Temperate	Yes	Yes	Chemical	12.5958	9.525	30.7258	802.39	29	-2	31	18.3	8.03333	22.4167	2.61667	904	110	43	22.6516	282	172	242	173
C620PR	2021-07-18	Europe	Italy	45.073333333	6.887222222	Natural	Pinus_sylvestris	Temperate_coniferous_forest	Temperate	No	No	No_data	8.47083	9.59167	35.5247	646.541	23.5	-3.5	27	4.66667	16.3333	16.5833	0.866667	948	103	59	14.5871	279	205	208	240
C620R5	2021-08-02	Europe	Italy	37.199944444	13.897972222	Crop	Triticum_aestivum_-Wheat-	Mediterranean_forest	Mediterranean	Yes	Yes	Chemical	17.0167	8.41667	36.9152	539.054	29.8	7	22.8	15.35	23.5833	23.9333	11.05	421	69	2	67.8169	197	14	39	134
C620R7	2021-08-02	Europe	Italy	37.198916667	13.896666667	Crop	Olea_europea_-Olive-	Mediterranean_forest	Mediterranean	Yes	Yes	Chemical	17.0167	8.41667	36.9152	539.054	29.8	7	22.8	15.35	23.5833	23.9333	11.05	421	69	2	67.8169	197	14	39	134
C620RD	2021-08-02	Europe	Italy	37.199055556	13.899305556	Crop	Pistaccia_vera_-Pistachio-	Mediterranean_forest	Mediterranean	No	Yes	Chemical	17.0167	8.41667	36.9152	539.054	29.8	7	22.8	15.35	23.5833	23.9333	11.05	421	69	2	67.8169	197	14	39	134
C620RH	2021-08-02	Europe	Italy	37.313166667	13.905388889	Crop	Prunus_dulcis_-Almond-	Mediterranean_forest	Mediterranean	Yes	Yes	Chemical	16.1208	8.525	35.9705	566.719	29.6	5.9	23.7	14.2333	23.1333	23.3833	9.88333	454	72	3	63.8448	204	19	45	144
C620RB	2021-08-31	Europe	Italy	37.589936111	12.907372222	Crop	Olea_europea_-Olive-	Mediterranean_forest	Mediterranean	Yes	Yes	Organic	17.9375	7.29167	34.7222	516.677	29.6	8.6	21	16.4667	24.2	24.6	12.1833	470	71	2	64.6156	205	13	41	156
C620RM	2021-08-31	Europe	Italy	37.642077778	12.941113889	Crop	Prunus_dulcis_-Almond-	Mediterranean_forest	Mediterranean	Yes	Yes	Chemical	17.4083	7.86667	34.963	551.077	30.1	7.6	22.5	15.5833	24.2333	24.4833	11.3333	499	73	3	62.1026	212	17	46	164
C620R6	2021-08-31	Europe	Italy	37.590233333	12.906852778	Crop	Cynara_scolymus_-Artichoke-	Mediterranean_forest	Mediterranean	Yes	Yes	Organic	17.9375	7.29167	34.7222	516.677	29.6	8.6	21	16.4667	24.2	24.6	12.1833	470	71	2	64.6156	205	13	41	156
C620RP	2021-09-01	Europe	Italy	35.508833	12.603944	Crop	Other	Mediterranean_forest	Mediterranean	Yes	Yes	Organic	19.5	4.7	26.1111	495.507	29.5	11.5	18	18.7667	25.1167	25.9667	13.9167	321	59	1	77.9749	166	7	22	103
C620RR	2021-09-03	Europe	Italy	37.581100000	14.196202778	Crop	Olea_europea_-Olive-	Mediterranean_forest	Mediterranean	Yes	Yes	Organic	15.5875	8.55833	35.365	585.69	29.4	5.2	24.2	13.55	22.9	23.1	9.2	481	75	4	61.2486	212	23	52	151
C620RF	2021-09-08	Europe	Italy	36.853216667	15.031947222	Crop	Citrus_spp._-Citron-	Mediterranean_forest	Mediterranean	Yes	Yes	Organic	17.6875	8.125	35.9513	545.011	30.1	7.5	22.6	15.95	24.4333	24.6667	11.6667	476	88	2	75.4746	236	16	47	152
C620RA	2021-09-08	Europe	Italy	36.854200000	15.032558333	Crop	Olea_europea_-Olive-	Mediterranean_forest	Mediterranean	Yes	Yes	Organic	17.6875	8.125	35.9513	545.011	30.1	7.5	22.6	15.95	24.4333	24.6667	11.6667	476	88	2	75.4746	236	16	47	152
C620R8	2021-09-08	Europe	Italy	36.854466667	15.034686111	Crop	Prunus_dulcis_-Almond-	Mediterranean_forest	Mediterranean	Yes	Yes	Organic	17.8	8.13333	35.9882	545.252	30.2	7.6	22.6	16.1	24.5333	24.7833	11.7667	473	88	2	75.206	234	16	47	151
C620RI	2021-09-08	Europe	Italy	36.879152778	15.041480556	Crop	Ceratonia_siliqua_-Carob-	Mediterranean_forest	Mediterranean	Yes	Yes	Organic	17.425	8.03333	35.5457	549.303	29.9	7.3	22.6	15.65	24.2333	24.4833	11.3833	484	91	2	74.9491	239	17	50	153
C620QY	2021-09-28	Europe	Italy	37.752027778	15.111750000	Crop	Prunus_cerasus_-Cherry-	Mediterranean_forest	Mediterranean	No	No	No_data	12.5333	7.43333	32.1789	591.613	25.4	2.3	23.1	10.25	19.9667	19.9667	5.83333	664	97	10	56.2795	273	40	40	248
C620R4	2021-09-28	Europe	Italy	37.864802778	15.123050000	Crop	Corylus_avellana_-Hazelnut-	Mediterranean_forest	Mediterranean	No	No	No_data	14.6167	8.01667	33.1267	598.921	28.3	4.1	24.2	9.4	22.2	22.2833	8	621	93	9	58.6934	261	35	75	239
C620QZ	2021-09-28	Europe	Italy	37.755408333	14.818752778	Crop	Pistaccia_vera_-Pistachio-	Mediterranean_forest	Mediterranean	Yes	Yes	Chemical	14.3042	8.50833	34.4467	610.277	28.2	3.5	24.7	8.91667	22.0333	22.05	7.5	570	88	7	59.0589	242	31	66	222
C620RK	2021-09-28	Europe	Italy	37.752225000	15.136233333	Crop	Vitis_vinifera_-Vine-	Mediterranean_forest	Mediterranean	Yes	Yes	Chemical	14.125	7.86667	33.6182	586.067	27.1	3.7	23.4	11.8833	21.5	21.5167	7.51667	645	93	9	57.9583	270	37	80	239
C620R3	2021-09-29	Europe	Italy	38.105661111	13.322069444	Crop	Citrus_spp._-Loquat-	Mediterranean_forest	Mediterranean	Yes	Yes	Organic	18.0417	7	32.8638	536.122	29.9	8.6	21.3	16.3833	24.6333	25	12.1167	477	70	3	57.3904	200	25	61	150
C620RO	2021-10-02	Europe	Italy	38.049944444	12.577580556	Crop	Olea_europea_-Olive-	Mediterranean_forest	Mediterranean	Yes	Yes	Organic	15.7208	6.59167	30.8022	557.015	28	6.6	21.4	13.8667	22.6833	22.9333	9.63333	546	81	5	57.8396	229	25	65	170
C620RQ	2021-10-03	Europe	Italy	37.849694444	13.078625000	Crop	Triticum_aestivum_-Wheat-	Mediterranean_forest	Mediterranean	Yes	Yes	Organic	16.5375	8.10833	33.9261	583.844	30.3	6.4	23.9	14.55	23.8167	24.1167	10.1833	513	74	4	58.5114	216	24	57	163
C620R9	2021-10-03	Europe	Italy	37.847513889	13.076658333	Crop	Vitis_vinifera_-Vine-	Mediterranean_forest	Mediterranean	Yes	Yes	Organic	16.5375	8.10833	33.9261	583.844	30.3	6.4	23.9	14.55	23.8167	24.1167	10.1833	513	74	4	58.5114	216	24	57	163
C620FL	2021-05-26	East Asia	Japan	36.080127	140.165461	Natural	Bambusa_spp_-Bamboo-	Temperate_deciduous_forest	Temperate	No	No	No_data	14.0583	8.96667	28.4656	797.111	29.3	-2.2	31.5	21.3167	4.25	23.8167	4.25	1335	185	38	44.0337	491	140	458	140
C620FK	2021-05-26	East Asia	Japan	36.083016	140.151837	Crop	Vaccinium_corymbosum_-Blueberry-	Temperate_deciduous_forest	Temperate	No	Yes	Organic	14.0542	8.95833	28.4392	796.979	29.3	-2.2	31.5	21.3	4.25	23.8167	4.25	1333	186	38	44.4023	492	138	459	138
C620FQ	2021-05-26	East Asia	Japan	36.055345	140.143075	Crop	Vaccinium_corymbosum_-Blueberry-	Temperate_deciduous_forest	Temperate	No	Yes	Organic	14.1875	8.89167	28.2275	797.685	29.5	-2	31.5	21.4333	4.38333	23.9667	4.38333	1350	187	38	44.255	498	140	470	140
C620FN	2021-05-26	East Asia	Japan	36.216951	140.071265	Crop	Citrus_spp._-Orange-	Temperate_deciduous_forest	Temperate	Yes	Yes	Organic	13.6	8.85	28.3654	796.136	28.8	-2.4	31.2	20.8167	3.85	23.3667	3.85	1325	186	33	47.206	498	125	472	125
C620FT	2021-05-26	East Asia	Japan	36.099888	140.111527	Crop	Diospyros_kaki_-Kaki-	Temperate_deciduous_forest	Temperate	No	No	No_data	14.1083	8.98333	28.4283	801.439	29.4	-2.2	31.6	21.3833	4.25	23.9333	4.25	1340	187	36	45.2296	498	135	471	135
C620FR	2021-05-26	East Asia	Japan	36.053381	140.148686	Crop	Ficus_carica_-Fig-	Temperate_deciduous_forest	Temperate	No	Yes	Organic	14.1875	8.89167	28.2275	797.685	29.5	-2	31.5	21.4333	4.38333	23.9667	4.38333	1350	187	38	44.255	498	140	470	140
C620FM	2021-05-26	East Asia	Japan	36.081993	140.163407	Crop	Prunus_domestica_-Plum-	Temperate_deciduous_forest	Temperate	No	No	No_data	14.0583	8.96667	28.4656	797.111	29.3	-2.2	31.5	21.3167	4.25	23.8167	4.25	1335	185	38	44.0337	491	140	458	140
C620FO	2021-05-26	East Asia	Japan	36.14852	140.034472	Crop	Pyrus_communis_-Pear-	Temperate_deciduous_forest	Temperate	No	Yes	Organic	14.025	9.23333	28.9446	804.819	29.5	-2.4	31.9	21.3	4.13333	23.8833	4.13333	1320	185	34	46.6717	494	127	473	127
C620FS	2021-05-26	East Asia	Japan	36.054263	140.150228	Crop	Fragaria_√ó_ananassa_-Strawberry-	Temperate_deciduous_forest	Temperate	Yes	Yes	Organic	14.1708	8.89167	28.2275	798.167	29.5	-2	31.5	21.4333	4.36667	23.95	4.36667	1344	186	38	44.0187	494	140	465	140
C620FP	2021-05-26	East Asia	Japan	36.059399	140.113471	Crop	Vitis_vinifera_-Vine-	Temperate_deciduous_forest	Temperate	No	Yes	Organic	14.2458	8.925	28.2437	801.568	29.6	-2	31.6	21.5167	4.38333	24.0667	4.38333	1341	187	37	44.9833	497	136	472	136
C620HM	2021-11-13	North America	Mexico	19.424167	-101.920833	Crop	Opuntia_ficus-indica_-Nopal-	Temperate_coniferous_forest	Temperate	No_data	No_data	No_data	20.075	16.1667	67.0816	201.917	31.5	7.4	24.1	21.1833	19.5333	22.25	17.2833	925	232	4	114.478	613	15	201	31
C620HQ	2021-11-13	North America	Mexico	19.417778	-101.928333	Crop	Rubus_sp._-Blackberry-	Temperate_coniferous_forest	Temperate	Yes	Yes	Chemical	20	16.0333	67.0851	199.909	31.3	7.4	23.9	21.1333	19.45	22.1333	17.2333	927	232	4	114.089	613	15	202	33
C620HO	2021-11-13	North America	Mexico	19.423333	101.920278	Crop	Musa_sp._-Banana-	Temperate_coniferous_forest	Temperate	No_data	No_data	No_data	24.5083	10.9333	53.5948	281.399	33.4	13	20.4	26.4333	20.55	27.1333	20.55	1441	299	12	85.474	776	45	462	45
C620HN	2021-11-13	North America	Mexico	19.424167	-101.920233	Crop	Persea_americana_-Avocado-	Temperate_coniferous_forest	Temperate	No	No	No_data	20.075	16.1667	67.0816	201.917	31.5	7.4	24.1	21.1833	19.5333	22.25	17.2833	925	232	4	114.478	613	15	201	31
C620HR	2021-11-13	North America	Mexico	19.529444	-102.305556	Crop	Persea_americana_-Avocado-	Temperate_coniferous_forest	Temperate	Yes	Yes	Chemical	16.8792	15.2083	64.9929	223.357	27.7	4.3	23.4	18.3667	16.2167	19.1833	13.75	1017	227	3	106.644	636	20	461	29
C620HK	2021-11-13	North America	Mexico	19.423889	-101.921389	Crop	Cucurbita_sp._-Pumpkin-	Temperate_coniferous_forest	Temperate	No_data	No_data	No_data	20.075	16.1667	67.0816	201.917	31.5	7.4	24.1	21.1833	19.5333	22.25	17.2833	925	232	4	114.478	613	15	201	31
C620HP	2021-11-13	North America	Mexico	19.423611	-101.919444	Crop	Saccharum_officinarum_-Sugarcane-	Temperate_coniferous_forest	Temperate	No_data	No_data	No_data	20.075	16.1667	67.0816	201.917	31.5	7.4	24.1	21.1833	19.5333	22.25	17.2833	925	232	4	114.478	613	15	201	31
C620HJ	2021-12-07	North America	Mexico	20.155833	-98.160278	Crop	Malus_domestica_-Apple-	Temperate_coniferous_forest	Temperate	No	No	No_data	14.2792	12.2583	63.1873	185.698	23.7	4.3	19.4	15.0833	11.7833	16.4333	11.7833	806	160	18	74.6133	397	57	210	57
C620HL	2021-12-07	North America	Mexico	20.155833	-98.160556	Crop	Prunus_domestica_-Plum-	Temperate_coniferous_forest	Temperate	No	No	No_data	14.2792	12.2583	63.1873	185.698	23.7	4.3	19.4	15.0833	11.7833	16.4333	11.7833	806	160	18	74.6133	397	57	210	57
C620HI	2021-12-07	North America	Mexico	20.155833	-98.160278	Crop	Pyrus_communis_-Pear-	Temperate_coniferous_forest	Temperate	No	No	No_data	14.2792	12.2583	63.1873	185.698	23.7	4.3	19.4	15.0833	11.7833	16.4333	11.7833	806	160	18	74.6133	397	57	210	57
C620VZ	2021-07-25	South Africa	Namibia	-21.942603	17.01637	Crop	Lactuca_sativa_-Lettuce-	Tropical_dry_forest	Tropical	No	No	No_data	20.0083	16.9833	59.8005	396.495	32.9	4.5	28.4	23.4167	14.6167	24.05	14.6167	357	93	0	112.97	248	1	220	1
C620W1	2021-07-25	South Africa	Namibia	-21.942603	16.91637	Crop	Solanum_lycopersicum_-Tomato-	Tropical_dry_forest	Tropical	No	No	No_data	20.0958	17.225	60.2273	399.218	33.2	4.6	28.6	23.5667	14.65	24.15	14.65	338	91	0	114.889	238	1	212	1
C620W3	2021-07-26	South Africa	Namibia	-21.972603	16.91637	Crop	Brassica_oleracea_-Cabbage-	Tropical_moist_forest	Tropical	No	No	No_data	20.275	17.3	60.0694	404.067	33.5	4.7	28.8	23.7833	14.7667	24.3667	14.7667	335	90	0	114.206	235	1	209	1
C620W0	2021-07-28	South Africa	Namibia	-28.42983	17.45002	Crop	Vitis_vinifera_-Vine-	Tropical_savannas	Tropical	Yes	Yes	Chemical	22.9917	15.1333	57.9821	436.806	36.1	10	26.1	27	20.1333	27.9333	17.3333	48	10	2	52.5703	24	6	22	8
C620W2	2021-08-01	South Africa	Namibia	-22.31592	17.363407	Crop	Zea_mays_-Corn-	Grasslands	Grasslands	No	No	No_data	18.3833	16.9	58.885	399.086	31.3	2.6	28.7	21.7333	13	22.5333	13	400	97	1	107.666	269	3	159	3
C620VY	2021-08-01	South Africa	Namibia	-22.53032	17.11945	Crop	Zea_mays_-Corn-	Tropical_dry_forest	Tropical	No	No	No_data	18.7667	15.0667	58.8542	359.882	30.7	5.1	25.6	21.6167	13.9333	22.5833	13.9333	363	90	0	110.516	251	2	142	2
C620VX	2021-08-01	South Africa	Namibia	-22.53032	17.11945	Crop	Solanum_tuberosum_-Potato-	Tropical_dry_forest	Tropical	No	No	No_data	18.7667	15.0667	58.8542	359.882	30.7	5.1	25.6	21.6167	13.9333	22.5833	13.9333	363	90	0	110.516	251	2	142	2
C620VW	2021-08-02	South Africa	Namibia	-19.24131	17.72947	Crop	Cenchrus_americanus_-Millet-	Tropical_savannas	Tropical	No	No	No_data	21.8417	14.9333	58.3333	350.33	33	7.4	25.6	23.85	17.0333	25.25	16.95	515	133	0	111.596	342	2	132	3
C620VU	2021-08-02	South Africa	Namibia	-17.90921	17.10462	Crop	Cenchrus_americanus_-Millet-	Southern_temperate_forest	Southern	No	No	No_data	22.4708	16.4417	58.9307	347.494	34.5	6.6	27.9	24.5167	17.5	25.6833	17.5	543	133	0	111.918	365	2	136	2
C620VV	2021-08-02	South Africa	Namibia	-18.09205	17.42281	Crop	Vigna_unguiculata_-Cowpea-	Southern_temperate_forest	Southern	No	No	No_data	22.4333	16.3167	58.693	347.996	34.4	6.6	27.8	24.4667	17.4833	25.7	17.4833	537	136	0	112.637	361	2	135	2
C620V0	2021-06-20	Europe	Netherlands	52.253869	4.592186	Crop	Malus_domestica_-Apple-	Temperate_deciduous_forest	Temperate	Yes	Yes	Organic	9.77083	7.125	33.7678	520.282	21.5	0.4	21.1	10.6833	8.63333	16.1667	3.6	826	95	46	24.1154	274	156	198	198
C620V2	2021-06-20	Europe	Netherlands	52.254935	4.591073	Crop	Pyrus_communis_-Pear-	Temperate_deciduous_forest	Temperate	Yes	Yes	Organic	9.79583	7.09167	33.6098	519.346	21.5	0.4	21.1	10.7	8.65	16.1833	3.65	824	95	46	24.2621	274	155	198	197
C620UT	2021-06-20	Europe	Netherlands	52.265316	4.473111	Crop	Mediago_sativa_-Alfalfa-	Temperate_deciduous_forest	Temperate	Yes	Yes	No	9.675	6.61667	32.1197	511.306	21	0.4	20.6	10.7667	8.28333	15.9667	3.7	797	94	42	25.835	270	146	212	191
C620V1	2021-06-20	Europe	Netherlands	52.265226	4.472855	Crop	Mediago_sativa_-Alfalfa-	Temperate_deciduous_forest	Temperate	Yes	Yes	No	9.675	6.61667	32.1197	511.306	21	0.4	20.6	10.7667	8.28333	15.9667	3.7	797	94	42	25.835	270	146	212	191
C620US	2021-06-20	Europe	Netherlands	52.234938	4.526993	Crop	Crocus_spp.	Temperate_deciduous_forest	Temperate	Yes	Yes	Chemical	9.79167	6.98333	33.254	518.827	21.4	0.4	21	10.7333	8.55	16.2	3.68333	817	95	45	24.8464	274	152	196	195
C620UP	2021-06-20	Europe	Netherlands	52.253466	4.47744	Crop	Hyacinthus_spp.	Temperate_deciduous_forest	Temperate	Yes	Yes	Chemical	9.70833	6.68333	32.2866	512.36	21.1	0.4	20.7	10.75	8.38333	16	3.7	803	94	43	25.4907	271	148	215	191
C620UR	2021-06-20	Europe	Netherlands	52.258636	4.473902	Crop	Hyacinthus_spp.	Temperate_deciduous_forest	Temperate	Yes	Yes	Chemical	9.675	6.61667	32.1197	511.306	21	0.4	20.6	10.7667	8.28333	15.9667	3.7	797	94	42	25.835	270	146	212	191
C620UV	2021-06-20	Europe	Netherlands	52.259485	4.470544	Crop	Hyacinthus_spp.	Temperate_deciduous_forest	Temperate	Yes	Yes	Chemical	9.675	6.61667	32.1197	511.306	21	0.4	20.6	10.7667	8.28333	15.9667	3.7	797	94	42	25.835	270	146	212	191
C620UX	2021-06-20	Europe	Netherlands	52.265222	4.472891	Crop	Hyacinthus_spp.	Temperate_deciduous_forest	Temperate	Yes	Yes	Chemical	9.675	6.61667	32.1197	511.306	21	0.4	20.6	10.7667	8.28333	15.9667	3.7	797	94	42	25.835	270	146	212	191
C620UQ	2021-06-20	Europe	Netherlands	52.234899	4.529396	Crop	Narcissus_spp._-Daffodils-	Temperate_deciduous_forest	Temperate	Yes	Yes	Chemical	9.79167	6.98333	33.254	518.827	21.4	0.4	21	10.7333	8.55	16.2	3.68333	817	95	45	24.8464	274	152	196	195
C620UU	2021-06-20	Europe	Netherlands	52.236127	4.528323	Crop	Narcissus_spp._-Daffodils-	Temperate_deciduous_forest	Temperate	Yes	Yes	Chemical	9.79167	6.98333	33.254	518.827	21.4	0.4	21	10.7333	8.55	16.2	3.68333	817	95	45	24.8464	274	152	196	195
C620V3	2021-06-20	Europe	Netherlands	52.233159	4.51184	Crop	Narcissus_spp._-Daffodils-	Temperate_deciduous_forest	Temperate	Yes	Yes	Chemical	9.80417	6.975	33.2143	518.518	21.4	0.4	21	10.7333	8.56667	16.2167	3.7	816	94	46	24.3375	272	153	197	194
C620UW	2021-06-20	Europe	Netherlands	52.234824	4.506687	Crop	Tulips_spp._-Tulips-	Temperate_deciduous_forest	Temperate	Yes	Yes	Chemical	9.77917	6.90833	33.0542	516.828	21.3	0.4	20.9	10.75	8.51667	16.15	3.7	814	94	45	24.5441	272	153	195	194
C620UY	2021-06-20	Europe	Netherlands	52.22982	4.499358	Crop	Tulips_spp._-Tulips-	Temperate_deciduous_forest	Temperate	Yes	Yes	Chemical	9.77917	6.89167	32.9745	516.172	21.3	0.4	20.9	10.75	8.51667	16.15	3.7	811	94	45	24.5599	271	152	194	194
C620UZ	2021-06-20	Europe	Netherlands	52.211286	4.470228	Crop	Tulips_spp._-Tulips-	Temperate_deciduous_forest	Temperate	Yes	Yes	Chemical	9.77917	6.84167	32.7352	515.538	21.3	0.4	20.9	10.75	8.5	16.15	3.71667	816	93	45	24.3532	271	153	197	195
C6210B	2021-06-25	Europe	Poland	53.9882999	18.745217	Crop	Hordeum_vulgare_-Barley-	Grasslands	Grasslands	Yes	Yes	Chemical	7.80833	7.61667	28.3147	721.734	22.6	-4.3	26.9	16.65	2.7	16.65	-1.03333	615	79	28	32.6036	220	94	220	111
C6210Y	2021-06-25	Europe	Poland	53.99463	18.752053	Crop	Hordeum_vulgare_-Barley-	Grasslands	Grasslands	Yes	Yes	Chemical	7.82917	7.64167	28.3025	722.06	22.7	-4.3	27	16.6833	2.73333	16.6833	-1.01667	616	79	28	32.7267	221	94	221	111
C62107	2021-06-25	Europe	Poland	53.9882999	18.745217	Crop	Secale_cereale_-Rye-	Grasslands	Grasslands	Yes	Yes	Chemical	7.80833	7.61667	28.3147	721.734	22.6	-4.3	26.9	16.65	2.7	16.65	-1.03333	615	79	28	32.6036	220	94	220	111
C6210X	2021-06-25	Europe	Poland	54.157274	18.906785	Crop	Secale_cereale_-Rye-	Grasslands	Grasslands	Yes	Yes	Chemical	7.95833	7.6	28.2528	719.096	22.7	-4.2	26.9	16.75	2.91667	16.75	-0.9	623	79	29	32.4273	221	95	221	114
C62109	2021-06-25	Europe	Poland	53.9882999	18.745217	Crop	Triticum_aestivum_-Wheat-	Grasslands	Grasslands	Yes	Yes	Chemical	7.80833	7.61667	28.3147	721.734	22.6	-4.3	26.9	16.65	2.7	16.65	-1.03333	615	79	28	32.6036	220	94	220	111
C62105	2021-06-25	Europe	Poland	53.9882999	18.745217	Crop	Triticum_aestivum_-Wheat-	Grasslands	Grasslands	Yes	Yes	Chemical	7.80833	7.61667	28.3147	721.734	22.6	-4.3	26.9	16.65	2.7	16.65	-1.03333	615	79	28	32.6036	220	94	220	111
C6210P	2021-06-25	Europe	Poland	53.9882999	18.745217	Crop	Triticum_aestivum_-Wheat-	Grasslands	Grasslands	Yes	Yes	Chemical	7.80833	7.61667	28.3147	721.734	22.6	-4.3	26.9	16.65	2.7	16.65	-1.03333	615	79	28	32.6036	220	94	220	111
C6210A	2021-06-25	Europe	Poland	54.157274	18.906785	Crop	Triticum_aestivum_-Wheat-	Grasslands	Grasslands	Yes	Yes	Chemical	7.95833	7.6	28.2528	719.096	22.7	-4.2	26.9	16.75	2.91667	16.75	-0.9	623	79	29	32.4273	221	95	221	114
C6210V	2021-06-25	Europe	Poland	54.157274	18.906785	Crop	Triticum_aestivum_-Wheat-	Grasslands	Grasslands	Yes	Yes	Chemical	7.95833	7.6	28.2528	719.096	22.7	-4.2	26.9	16.75	2.91667	16.75	-0.9	623	79	29	32.4273	221	95	221	114
C6210N	2021-06-25	Europe	Poland	53.994348	18.7451387	Crop	Zea_mays_-Corn-	Grasslands	Grasslands	Yes	Yes	Chemical	7.8125	7.625	28.3457	721.246	22.6	-4.3	26.9	16.65	2.7	16.65	-1.01667	615	79	28	32.5627	220	94	220	111
C6210F	2021-06-25	Europe	Poland	54.157274	18.906785	Crop	Zea_mays_-Corn-	Grasslands	Grasslands	Yes	Yes	Chemical	7.95833	7.6	28.2528	719.096	22.7	-4.2	26.9	16.75	2.91667	16.75	-0.9	623	79	29	32.4273	221	95	221	114
C6210R	2021-06-25	Europe	Poland	53.9882999	18.745217	Crop	Glycine_max_-Soybean-	Grasslands	Grasslands	Yes	Yes	Chemical	7.80833	7.61667	28.3147	721.734	22.6	-4.3	26.9	16.65	2.7	16.65	-1.03333	615	79	28	32.6036	220	94	220	111
C62100	2021-06-25	Europe	Poland	53.9882999	18.745217	Crop	Lupinus_spp._-Lupine-	Grasslands	Grasslands	Yes	Yes	Chemical	7.80833	7.61667	28.3147	721.734	22.6	-4.3	26.9	16.65	2.7	16.65	-1.03333	615	79	28	32.6036	220	94	220	111
C6210S	2021-06-25	Europe	Poland	53.9882999	18.745217	Crop	Lupinus_spp._-Lupine-	Grasslands	Grasslands	Yes	Yes	Chemical	7.80833	7.61667	28.3147	721.734	22.6	-4.3	26.9	16.65	2.7	16.65	-1.03333	615	79	28	32.6036	220	94	220	111
C6210G	2021-06-25	Europe	Poland	53.9882999	18.745217	Crop	Mediago_sativa_-Alfalfa-	Grasslands	Grasslands	Yes	Yes	Chemical	7.80833	7.61667	28.3147	721.734	22.6	-4.3	26.9	16.65	2.7	16.65	-1.03333	615	79	28	32.6036	220	94	220	111
C6210W	2021-06-25	Europe	Poland	53.989792	18.745701	Crop	Phaseolus_vulgaris_-Bean-	Grasslands	Grasslands	Yes	Yes	Chemical	7.80833	7.61667	28.3147	721.734	22.6	-4.3	26.9	16.65	2.7	16.65	-1.03333	615	79	28	32.6036	220	94	220	111
C6210K	2021-06-25	Europe	Poland	53.9882999	18.745217	Crop	Pisum_sativum_-Pea-	Grasslands	Grasslands	Yes	Yes	Chemical	7.80833	7.61667	28.3147	721.734	22.6	-4.3	26.9	16.65	2.7	16.65	-1.03333	615	79	28	32.6036	220	94	220	111
C6210M	2021-06-25	Europe	Poland	53.9882999	18.745217	Crop	Trifolium_spp._-Clover-	Grasslands	Grasslands	Yes	Yes	Chemical	7.80833	7.61667	28.3147	721.734	22.6	-4.3	26.9	16.65	2.7	16.65	-1.03333	615	79	28	32.6036	220	94	220	111
C6210L	2021-06-25	Europe	Poland	53.9882999	18.745217	Crop	Beta_vulgaris_-Beet-	Grasslands	Grasslands	Yes	Yes	Chemical	7.80833	7.61667	28.3147	721.734	22.6	-4.3	26.9	16.65	2.7	16.65	-1.03333	615	79	28	32.6036	220	94	220	111
C6210H	2021-06-25	Europe	Poland	54.157274	18.906785	Crop	Beta_vulgaris_-Beet-	Grasslands	Grasslands	Yes	Yes	Chemical	7.95833	7.6	28.2528	719.096	22.7	-4.2	26.9	16.75	2.91667	16.75	-0.9	623	79	29	32.4273	221	95	221	114
C6210T	2021-06-25	Europe	Poland	54.157274	18.906785	Crop	Beta_vulgaris_-Beet-	Grasslands	Grasslands	Yes	Yes	Chemical	7.95833	7.6	28.2528	719.096	22.7	-4.2	26.9	16.75	2.91667	16.75	-0.9	623	79	29	32.4273	221	95	221	114
C6210E	2021-06-25	Europe	Poland	53.667269	18.792678	Crop	Solanum_tuberosum_-Potato-	Grasslands	Grasslands	Yes	Yes	Chemical	8.02917	8.14167	29.4988	736.591	23	-4.6	27.6	17.0167	-0.15	17.0167	-1.06667	578	78	25	34.7859	214	86	214	100
C6210U	2021-06-25	Europe	Poland	53.9882999	18.745217	Crop	Brassica_napus_-Rapeseed-	Grasslands	Grasslands	Yes	Yes	Chemical	7.80833	7.61667	28.3147	721.734	22.6	-4.3	26.9	16.65	2.7	16.65	-1.03333	615	79	28	32.6036	220	94	220	111
C6210J	2021-06-26	Europe	Poland	53.839431	18.906519	Crop	Hordeum_vulgare_-Barley-	Grasslands	Grasslands	Yes	Yes	Chemical	7.95417	7.84167	28.7241	730.151	22.8	-4.5	27.3	16.85	-0.15	16.85	-1.08333	600	80	26	34.7351	221	90	221	105
C62106	2021-06-26	Europe	Poland	53.750439	18.919658	Crop	Triticum_aestivum_-Wheat-	Grasslands	Grasslands	Yes	Yes	Chemical	8.11667	7.95	29.0146	738.685	23	-4.4	27.4	17.15	-0.0666667	17.15	-1.01667	590	79	26	34.7224	217	88	217	103
C6210I	2021-06-26	Europe	Poland	53.822412	18.933058	Crop	Zea_mays_-Corn-	Grasslands	Grasslands	Yes	Yes	Chemical	7.95833	7.76667	28.5539	732.517	22.7	-4.5	27.2	16.8833	-0.166667	16.8833	-1.13333	596	79	26	35.0378	220	89	220	103
C621OD	2021-06-26	Europe	Poland	53.669415	18.77978	Crop	Pisum_sativum_-Pea-	Grasslands	Grasslands	Yes	Yes	Chemical	8.02083	8.025	29.2883	734.554	22.9	-4.5	27.4	17	-0.133333	17	-1.05	575	78	25	35.1763	214	86	214	99
C6210C	2021-06-26	Europe	Poland	53.669415	18.77978	Crop	Allium_cepa_-Onion-	Grasslands	Grasslands	Yes	Yes	Chemical	8.02083	8.025	29.2883	734.554	22.9	-4.5	27.4	17	-0.133333	17	-1.05	575	78	25	35.1763	214	86	214	99
C6210Q	2021-06-26	Europe	Poland	53.762976	18.921463	Crop	Brassica_oleracea_-Cabbage-	Grasslands	Grasslands	Yes	Yes	Chemical	8.07917	7.925	28.8182	740.103	23	-4.5	27.5	17.1167	-0.116667	17.1167	-1.08333	591	79	26	34.844	218	88	218	103
C62108	2021-06-26	Europe	Poland	53.682122	18.843683	Crop	Daucus_carota_-Carrot-	Grasslands	Grasslands	Yes	Yes	Chemical	7.99583	8.05833	29.5177	734.486	22.8	-4.5	27.3	16.9667	-0.133333	16.9667	-1.1	579	78	25	35.0631	215	86	215	100
C620SG	2021-08-18	Europe	Romania	47.702514	26.53347	Crop	Zea_mays_-Corn-	Temperate_broadleaf_and_mixed_forest	Temperate	No	No	No_data	8.75833	9.73333	30.8995	843.523	25.3	-6.2	31.5	17.5333	-0.466667	18.8833	-1.71667	571	93	22	52.5757	252	71	243	72
C620ST	2021-08-18	Europe	Romania	47.694868	26.511745	Crop	Glycine_max_-Soybean-	Temperate_broadleaf_and_mixed_forest	Temperate	No_data	No_data	No_data	8.82917	9.95833	31.3155	847.184	25.5	-6.3	31.8	17.65	-0.416667	19	-1.7	569	94	22	53.0353	252	70	244	72
C620SX	2021-08-18	Europe	Romania	47.692964	26.515465	Crop	Mediago_sativa_-Alfalfa-	Temperate_broadleaf_and_mixed_forest	Temperate	No	No	No_data	8.82917	9.95833	31.3155	847.184	25.5	-6.3	31.8	17.65	-0.416667	19	-1.7	569	94	22	53.0353	252	70	244	72
C620SK	2021-08-18	Europe	Romania	47.691088	26.519488	Crop	Juglans_regia_-Walnut-	Temperate_broadleaf_and_mixed_forest	Temperate	No_data	No_data	No_data	8.825	9.96667	31.1458	849.014	25.6	-6.4	32	17.6667	-0.45	19.0167	-1.73333	569	94	22	53.0134	252	70	244	72
C620SN	2021-08-18	Europe	Romania	47.691968	26.51628	Crop	Helianthus_annuus_-Sunflower-	Temperate_broadleaf_and_mixed_forest	Temperate	Yes	No_data	No_data	8.82917	9.95833	31.3155	847.184	25.5	-6.3	31.8	17.65	-0.416667	19	-1.7	569	94	22	53.0353	252	70	244	72
C620SO	2021-08-22	Europe	Romania	47.056235	27.391795	Crop	Bromus_spp._-Brome_grass-	Temperate_broadleaf_and_mixed_forest	Temperate	No	No	No_data	8.8625	9.09167	29.0469	848.22	25.3	-6	31.3	17.6167	-0.45	19.0833	-1.65	563	90	24	45.5968	233	80	227	82
C620S7	2021-08-22	Europe	Romania	47.114074	27.413553	Crop	Bromus_spp._-Brome_grass-	Temperate_broadleaf_and_mixed_forest	Temperate	No	No	No_data	9.75417	10.0917	30.6738	874.236	27	-5.9	32.9	18.8333	0.216667	20.25	-1.15	555	89	24	46.334	232	77	223	80
C620SS	2021-08-22	Europe	Romania	47.0568	27.391466	Crop	Bromus_spp._-Brome_grass-	Temperate_broadleaf_and_mixed_forest	Temperate	No	No	No_data	8.83333	9.01667	28.8996	845.599	25.2	-6	31.2	17.55	-0.45	19.0333	-1.65	563	90	24	45.5968	233	80	227	82
C620SR	2021-08-22	Europe	Romania	47.111669	27.398769	Crop	Triticum_aestivum_-Wheat-	Temperate_broadleaf_and_mixed_forest	Temperate	No_data	No_data	No_data	9.7	9.98333	30.437	873.241	26.9	-5.9	32.8	18.7667	0.166667	20.2	-1.18333	559	90	24	46.4552	234	77	224	80
C620SZ	2021-08-22	Europe	Romania	47.111844	27.396748	Crop	Triticum_aestivum_-Wheat-	Temperate_broadleaf_and_mixed_forest	Temperate	No_data	No_data	No_data	9.7	9.98333	30.437	873.241	26.9	-5.9	32.8	18.7667	0.166667	20.2	-1.18333	559	90	24	46.4552	234	77	224	80
C620SA	2021-08-22	Europe	Romania	47.10299	27.455336	Crop	Zea_mays_-Corn-	Temperate_broadleaf_and_mixed_forest	Temperate	Yes	Yes	No_data	9.55	10.0167	30.632	870.807	26.6	-6.1	32.7	18.6	0.0166667	20	-1.31667	564	90	24	45.2093	233	80	225	82
C620SY	2021-08-22	Europe	Romania	47.109224	27.468094	Crop	Zea_mays_-Corn-	Temperate_broadleaf_and_mixed_forest	Temperate	Yes	No_data	No_data	9.55	9.95	30.4281	872.577	26.6	-6.1	32.7	18.6167	4.96705e-08	20.0167	-1.33333	562	90	24	45.4091	233	80	224	82
C620SC	2021-08-22	Europe	Romania	47.100375	27.373413	Crop	Zea_mays_-Corn-	Temperate_broadleaf_and_mixed_forest	Temperate	No	No	No_data	9.625	9.8	30.1538	868.642	26.7	-5.8	32.5	18.6333	0.15	20.0833	-1.18333	556	89	23	46.2543	231	77	224	79
C620SE	2021-08-22	Europe	Romania	47.121317	27.518572	Crop	Zea_mays_-Corn-	Temperate_broadleaf_and_mixed_forest	Temperate	Yes	No_data	No_data	9.75417	9.875	30.0152	876.852	26.9	-6	32.9	18.85	0.183333	20.2833	-1.2	561	89	24	44.9619	231	80	223	82
C620T0	2021-08-22	Europe	Romania	47.115878	27.410706	Crop	Prunus_domestica_-Plum-	Temperate_broadleaf_and_mixed_forest	Temperate	No_data	No_data	No_data	9.75417	10.0917	30.6738	874.236	27	-5.9	32.9	18.8333	0.216667	20.25	-1.15	555	89	24	46.334	232	77	223	80
C620SW	2021-08-22	Europe	Romania	47.115637	27.410282	Crop	Prunus_domestica_-Plum-	Temperate_broadleaf_and_mixed_forest	Temperate	No_data	No_data	No_data	9.75417	10.0917	30.6738	874.236	27	-5.9	32.9	18.8333	0.216667	20.25	-1.15	555	89	24	46.334	232	77	223	80
C620SV	2021-08-22	Europe	Romania	47.113248	27.41336	Crop	Glycine_max_-Soybean-	Temperate_broadleaf_and_mixed_forest	Temperate	Yes	Yes	No_data	9.75417	10.0917	30.6738	874.236	27	-5.9	32.9	18.8333	0.216667	20.25	-1.15	555	89	24	46.334	232	77	223	80
C620SP	2021-08-22	Europe	Romania	47.114249	27.412996	Crop	Glycine_max_-Soybean-	Temperate_broadleaf_and_mixed_forest	Temperate	Yes	Yes	No_data	9.75417	10.0917	30.6738	874.236	27	-5.9	32.9	18.8333	0.216667	20.25	-1.15	555	89	24	46.334	232	77	223	80
C620SB	2021-08-22	Europe	Romania	47.111582	27.396521	Crop	Mediago_sativa_-Alfalfa-	Temperate_broadleaf_and_mixed_forest	Temperate	No_data	No_data	No_data	9.7	9.98333	30.437	873.241	26.9	-5.9	32.8	18.7667	0.166667	20.2	-1.18333	559	90	24	46.4552	234	77	224	80
C620SH	2021-08-22	Europe	Romania	47.100444	27.372718	Crop	Mediago_sativa_-Alfalfa-	Temperate_broadleaf_and_mixed_forest	Temperate	No	No	No_data	9.625	9.8	30.1538	868.642	26.7	-5.8	32.5	18.6333	0.15	20.0833	-1.18333	556	89	23	46.2543	231	77	224	79
C620SL	2021-08-22	Europe	Romania	47.070728	27.408309	Natural	Pasture	Temperate_broadleaf_and_mixed_forest	Temperate	No	No	No_data	9.15417	9.50833	29.8067	858.073	25.9	-6	31.9	18.0333	-0.233333	19.5	-1.5	563	90	24	45.6315	232	80	227	81
C620SM	2021-08-22	Europe	Romania	47.119561	27.519904	Natural	Pasture	Temperate_broadleaf_and_mixed_forest	Temperate	No	No	No_data	9.75417	9.875	30.0152	876.852	26.9	-6	32.9	18.85	0.183333	20.2833	-1.2	561	89	24	44.9619	231	80	223	82
C620S8	2021-08-22	Europe	Romania	47.070391	27.409861	Natural	Pasture	Temperate_broadleaf_and_mixed_forest	Temperate	No	No	No_data	9.37917	9.625	29.8913	864.135	26.3	-5.9	32.2	18.3333	-0.0833333	19.7833	-1.36667	559	89	24	45.521	231	79	224	80
C620SF	2021-08-22	Europe	Romania	47.039236	27.343109	Natural	Pasture	Temperate_broadleaf_and_mixed_forest	Temperate	No	No	No_data	8.3625	8.69167	28.4041	834.86	24.4	-6.2	30.6	16.9333	-0.816667	18.4333	-1.96667	569	90	25	45.6302	236	83	231	84
C620SI	2021-08-22	Europe	Romania	47.103345	27.455454	Crop	Helianthus_annuus_-Sunflower-	Temperate_broadleaf_and_mixed_forest	Temperate	Yes	Yes	No_data	9.55	10.0167	30.632	870.807	26.6	-6.1	32.7	18.6	0.0166667	20	-1.31667	564	90	24	45.2093	233	80	225	82
C620SU	2021-08-22	Europe	Romania	47.102743	27.454117	Crop	Helianthus_annuus_-Sunflower-	Temperate_broadleaf_and_mixed_forest	Temperate	Yes	No_data	No_data	9.55	10.0167	30.632	870.807	26.6	-6.1	32.7	18.6	0.0166667	20	-1.31667	564	90	24	45.2093	233	80	225	82
C620SD	2021-08-22	Europe	Romania	47.152535	27.474042	Crop	Helianthus_annuus_-Sunflower-	Temperate_broadleaf_and_mixed_forest	Temperate	Yes	No_data	No_data	9.5125	9.99167	30.3698	873.77	26.7	-6.2	32.9	18.5833	-0.0333333	20.0167	-1.36667	563	91	24	46.0805	234	79	227	82
C620S9	2021-08-22	Europe	Romania	47.154013	27.474729	Crop	Vitis_vinifera_-Vine-	Temperate_broadleaf_and_mixed_forest	Temperate	No_data	No_data	No_data	9.5125	9.99167	30.3698	873.77	26.7	-6.2	32.9	18.5833	-0.0333333	20.0167	-1.36667	563	91	24	46.0805	234	79	227	82
C620SJ	2021-08-22	Europe	Romania	47.10003	27.373732	Crop	Vitis_vinifera_-Vine-	Temperate_broadleaf_and_mixed_forest	Temperate	No	No	No_data	9.625	9.8	30.1538	868.642	26.7	-5.8	32.5	18.6333	0.15	20.0833	-1.18333	556	89	23	46.2543	231	77	224	79
C620SQ	2021-08-22	Europe	Romania	47.100158	27.373823	Crop	Vitis_vinifera_-Vine-	Temperate_broadleaf_and_mixed_forest	Temperate	No	No	No_data	9.625	9.8	30.1538	868.642	26.7	-5.8	32.5	18.6333	0.15	20.0833	-1.18333	556	89	23	46.2543	231	77	224	79
C620EB	2021-09-01	Europe	Russia	60.412222222	30.476111111	Crop	Prunus_domestica_-Plum-	Boreal_Forest	Boreal	No	Yes	Chemical	4.3	6.7	20.6154	915.684	21.3	-11.2	32.5	14.1833	-1.93333	15.5167	-7	638	81	31	31.8874	223	99	214	125
C620DZ	2021-09-01	Europe	Russia	60.404722222	30.469722222	Crop	Pyrus_communis_-Pear-	Boreal_Forest	Boreal	No	Yes	Chemical	4.28333	6.66667	20.5761	913.451	21.2	-11.2	32.4	14.1333	-1.93333	15.4833	-6.98333	640	81	31	31.8138	224	100	215	125
C620EF	2021-09-01	Europe	Russia	60.412222222	30.476111111	Crop	Pyrus_communis_-Pear-	Boreal_Forest	Boreal	No	Yes	Chemical	4.3	6.7	20.6154	915.684	21.3	-11.2	32.5	14.1833	-1.93333	15.5167	-7	638	81	31	31.8874	223	99	214	125
C620DY	2021-09-01	Europe	Russia	60.404722222	30.469722222	Crop	Corylus_avellana_-Hazelnut-	Boreal_Forest	Boreal	No	Yes	Chemical	4.28333	6.66667	20.5761	913.451	21.2	-11.2	32.4	14.1333	-1.93333	15.4833	-6.98333	640	81	31	31.8138	224	100	215	125
C620DU	2021-09-01	Europe	Russia	60.412222222	30.476111111	Crop	Cucumis_sativus_-Cucumber-	Boreal_Forest	Boreal	No	Yes	Chemical	4.3	6.7	20.6154	915.684	21.3	-11.2	32.5	14.1833	-1.93333	15.5167	-7	638	81	31	31.8874	223	99	214	125
C620DW	2021-09-01	Europe	Russia	60.412222222	30.476111111	Crop	Cucumis_sativus_-Cucumber-	Boreal_Forest	Boreal	No	Yes	Chemical	4.3	6.7	20.6154	915.684	21.3	-11.2	32.5	14.1833	-1.93333	15.5167	-7	638	81	31	31.8874	223	99	214	125
C620EG	2021-09-29	Europe	Russia	53.245186	36.501939	Crop	Solanum_tuberosum_-Potato-	Temperate_deciduous_forest	Temperate	Yes	Yes	Organic	4.98333	8	22.5352	1005.54	23	-12.5	35.5	16.9333	-1.46667	16.9333	-7.55	626	85	34	28.308	219	109	219	125
C620EH	2021-09-29	Europe	Russia	53.245186	36.501939	Crop	Solanum_tuberosum_-Potato-	Temperate_deciduous_forest	Temperate	Yes	Yes	Organic	4.98333	8	22.5352	1005.54	23	-12.5	35.5	16.9333	-1.46667	16.9333	-7.55	626	85	34	28.308	219	109	219	125
C620EI	2021-09-29	Europe	Russia	53.245186	36.501939	Crop	Solanum_tuberosum_-Potato-	Temperate_deciduous_forest	Temperate	Yes	Yes	Organic	4.98333	8	22.5352	1005.54	23	-12.5	35.5	16.9333	-1.46667	16.9333	-7.55	626	85	34	28.308	219	109	219	125
C620EJ	2021-09-29	Europe	Russia	53.245186	36.501939	Crop	Solanum_tuberosum_-Potato-	Temperate_deciduous_forest	Temperate	Yes	Yes	Organic	4.98333	8	22.5352	1005.54	23	-12.5	35.5	16.9333	-1.46667	16.9333	-7.55	626	85	34	28.308	219	109	219	125
C620EK	2021-09-29	Europe	Russia	53.245186	36.501939	Crop	Solanum_tuberosum_-Potato-	Temperate_deciduous_forest	Temperate	Yes	Yes	Organic	4.98333	8	22.5352	1005.54	23	-12.5	35.5	16.9333	-1.46667	16.9333	-7.55	626	85	34	28.308	219	109	219	125
C620EL	2021-09-29	Europe	Russia	53.245186	36.501939	Crop	Solanum_tuberosum_-Potato-	Temperate_deciduous_forest	Temperate	Yes	Yes	Organic	4.98333	8	22.5352	1005.54	23	-12.5	35.5	16.9333	-1.46667	16.9333	-7.55	626	85	34	28.308	219	109	219	125
C620EM	2021-09-29	Europe	Russia	53.245186	36.501939	Crop	Solanum_tuberosum_-Potato-	Temperate_deciduous_forest	Temperate	Yes	Yes	Organic	4.98333	8	22.5352	1005.54	23	-12.5	35.5	16.9333	-1.46667	16.9333	-7.55	626	85	34	28.308	219	109	219	125
C620EN	2021-09-29	Europe	Russia	53.245186	36.501939	Crop	Solanum_tuberosum_-Potato-	Temperate_deciduous_forest	Temperate	Yes	Yes	Organic	4.98333	8	22.5352	1005.54	23	-12.5	35.5	16.9333	-1.46667	16.9333	-7.55	626	85	34	28.308	219	109	219	125
C620EO	2021-09-29	Europe	Russia	53.245186	36.501939	Crop	Solanum_tuberosum_-Potato-	Temperate_deciduous_forest	Temperate	Yes	Yes	Organic	4.98333	8	22.5352	1005.54	23	-12.5	35.5	16.9333	-1.46667	16.9333	-7.55	626	85	34	28.308	219	109	219	125
C620EP	2021-09-29	Europe	Russia	53.245186	36.501939	Crop	Solanum_tuberosum_-Potato-	Temperate_deciduous_forest	Temperate	Yes	Yes	Organic	4.98333	8	22.5352	1005.54	23	-12.5	35.5	16.9333	-1.46667	16.9333	-7.55	626	85	34	28.308	219	109	219	125
C620EQ	2021-09-29	Europe	Russia	53.245186	36.501939	Crop	Solanum_tuberosum_-Potato-	Temperate_deciduous_forest	Temperate	Yes	Yes	Organic	4.98333	8	22.5352	1005.54	23	-12.5	35.5	16.9333	-1.46667	16.9333	-7.55	626	85	34	28.308	219	109	219	125
C620ER	2021-09-29	Europe	Russia	53.245186	36.501939	Crop	Solanum_tuberosum_-Potato-	Temperate_deciduous_forest	Temperate	Yes	Yes	Organic	4.98333	8	22.5352	1005.54	23	-12.5	35.5	16.9333	-1.46667	16.9333	-7.55	626	85	34	28.308	219	109	219	125
C620ES	2021-09-29	Europe	Russia	53.245186	36.501939	Crop	Solanum_tuberosum_-Potato-	Temperate_deciduous_forest	Temperate	Yes	Yes	Organic	4.98333	8	22.5352	1005.54	23	-12.5	35.5	16.9333	-1.46667	16.9333	-7.55	626	85	34	28.308	219	109	219	125
C620ET	2021-09-29	Europe	Russia	53.245186	36.501939	Crop	Solanum_tuberosum_-Potato-	Temperate_deciduous_forest	Temperate	Yes	Yes	Organic	4.98333	8	22.5352	1005.54	23	-12.5	35.5	16.9333	-1.46667	16.9333	-7.55	626	85	34	28.308	219	109	219	125
C620EU	2021-09-29	Europe	Russia	53.245186	36.501939	Crop	Solanum_tuberosum_-Potato-	Temperate_deciduous_forest	Temperate	Yes	Yes	Organic	4.98333	8	22.5352	1005.54	23	-12.5	35.5	16.9333	-1.46667	16.9333	-7.55	626	85	34	28.308	219	109	219	125
C620EV	2021-09-29	Europe	Russia	53.245186	36.501939	Crop	Solanum_tuberosum_-Potato-	Temperate_deciduous_forest	Temperate	Yes	Yes	Organic	4.98333	8	22.5352	1005.54	23	-12.5	35.5	16.9333	-1.46667	16.9333	-7.55	626	85	34	28.308	219	109	219	125
C620EW	2021-09-29	Europe	Russia	53.245186	36.501939	Crop	Solanum_tuberosum_-Potato-	Temperate_deciduous_forest	Temperate	Yes	Yes	Organic	4.98333	8	22.5352	1005.54	23	-12.5	35.5	16.9333	-1.46667	16.9333	-7.55	626	85	34	28.308	219	109	219	125
C620EX	2021-09-29	Europe	Russia	53.245186	36.501939	Crop	Solanum_tuberosum_-Potato-	Temperate_deciduous_forest	Temperate	Yes	Yes	Organic	4.98333	8	22.5352	1005.54	23	-12.5	35.5	16.9333	-1.46667	16.9333	-7.55	626	85	34	28.308	219	109	219	125
C620EY	2021-09-29	Europe	Russia	53.245186	36.501939	Crop	Solanum_tuberosum_-Potato-	Temperate_deciduous_forest	Temperate	Yes	Yes	Organic	4.98333	8	22.5352	1005.54	23	-12.5	35.5	16.9333	-1.46667	16.9333	-7.55	626	85	34	28.308	219	109	219	125
C620EZ	2021-09-29	Europe	Russia	53.245186	36.501939	Crop	Solanum_tuberosum_-Potato-	Temperate_deciduous_forest	Temperate	Yes	Yes	Organic	4.98333	8	22.5352	1005.54	23	-12.5	35.5	16.9333	-1.46667	16.9333	-7.55	626	85	34	28.308	219	109	219	125
C620F0	2021-09-29	Europe	Russia	53.245186	36.501939	Crop	Solanum_tuberosum_-Potato-	Temperate_deciduous_forest	Temperate	Yes	Yes	Organic	4.98333	8	22.5352	1005.54	23	-12.5	35.5	16.9333	-1.46667	16.9333	-7.55	626	85	34	28.308	219	109	219	125
C620F1	2021-09-29	Europe	Russia	53.245186	36.501939	Crop	Solanum_tuberosum_-Potato-	Temperate_deciduous_forest	Temperate	Yes	Yes	Organic	4.98333	8	22.5352	1005.54	23	-12.5	35.5	16.9333	-1.46667	16.9333	-7.55	626	85	34	28.308	219	109	219	125
C620F2	2021-09-29	Europe	Russia	53.245186	36.501939	Crop	Solanum_tuberosum_-Potato-	Temperate_deciduous_forest	Temperate	Yes	Yes	Organic	4.98333	8	22.5352	1005.54	23	-12.5	35.5	16.9333	-1.46667	16.9333	-7.55	626	85	34	28.308	219	109	219	125
C620F3	2021-09-29	Europe	Russia	53.245186	36.501939	Crop	Solanum_tuberosum_-Potato-	Temperate_deciduous_forest	Temperate	Yes	Yes	Organic	4.98333	8	22.5352	1005.54	23	-12.5	35.5	16.9333	-1.46667	16.9333	-7.55	626	85	34	28.308	219	109	219	125
C620F4	2021-09-29	Europe	Russia	53.245186	36.501939	Crop	Solanum_tuberosum_-Potato-	Temperate_deciduous_forest	Temperate	Yes	Yes	Organic	4.98333	8	22.5352	1005.54	23	-12.5	35.5	16.9333	-1.46667	16.9333	-7.55	626	85	34	28.308	219	109	219	125
C620F5	2021-09-29	Europe	Russia	53.245186	36.501939	Crop	Solanum_tuberosum_-Potato-	Temperate_deciduous_forest	Temperate	Yes	Yes	Organic	4.98333	8	22.5352	1005.54	23	-12.5	35.5	16.9333	-1.46667	16.9333	-7.55	626	85	34	28.308	219	109	219	125
C620F6	2021-09-29	Europe	Russia	53.245186	36.501939	Crop	Solanum_tuberosum_-Potato-	Temperate_deciduous_forest	Temperate	Yes	Yes	Organic	4.98333	8	22.5352	1005.54	23	-12.5	35.5	16.9333	-1.46667	16.9333	-7.55	626	85	34	28.308	219	109	219	125
C620F7	2021-09-29	Europe	Russia	53.245186	36.501939	Crop	Solanum_tuberosum_-Potato-	Temperate_deciduous_forest	Temperate	Yes	Yes	Organic	4.98333	8	22.5352	1005.54	23	-12.5	35.5	16.9333	-1.46667	16.9333	-7.55	626	85	34	28.308	219	109	219	125
C620F8	2021-09-29	Europe	Russia	53.245186	36.501939	Crop	Solanum_tuberosum_-Potato-	Temperate_deciduous_forest	Temperate	Yes	Yes	Organic	4.98333	8	22.5352	1005.54	23	-12.5	35.5	16.9333	-1.46667	16.9333	-7.55	626	85	34	28.308	219	109	219	125
C620F9	2021-09-29	Europe	Russia	53.245186	36.501939	Crop	Solanum_tuberosum_-Potato-	Temperate_deciduous_forest	Temperate	Yes	Yes	Organic	4.98333	8	22.5352	1005.54	23	-12.5	35.5	16.9333	-1.46667	16.9333	-7.55	626	85	34	28.308	219	109	219	125
C620DV	2021-09-30	Europe	Russia	60.371077778	30.371113889	Crop	Rosa_spp.	Boreal_Forest	Boreal	No	Yes	Chemical	4.35	6.58333	20.2564	919.669	21.3	-11.2	32.5	14.2667	-1.91667	15.6	-7.01667	634	81	31	32.4155	223	98	216	124
C620E1	2021-09-30	Europe	Russia	60.371077778	30.371113889	Crop	Ribes_uva-crispa_-Gooseberry-	Boreal_Forest	Boreal	No	Yes	Chemical	4.35	6.58333	20.2564	919.669	21.3	-11.2	32.5	14.2667	-1.91667	15.6	-7.01667	634	81	31	32.4155	223	98	216	124
C620EA	2021-09-30	Europe	Russia	60.371077778	30.371113889	Crop	Rubus_sp._-Blackberry-	Boreal_Forest	Boreal	No	Yes	Chemical	4.35	6.58333	20.2564	919.669	21.3	-11.2	32.5	14.2667	-1.91667	15.6	-7.01667	634	81	31	32.4155	223	98	216	124
C620E9	2021-09-30	Europe	Russia	60.371077778	30.371113889	Crop	Malus_domestica_-Apple-	Boreal_Forest	Boreal	No	Yes	Chemical	4.35	6.58333	20.2564	919.669	21.3	-11.2	32.5	14.2667	-1.91667	15.6	-7.01667	634	81	31	32.4155	223	98	216	124
C620ED	2021-09-30	Europe	Russia	60.371077778	30.371113889	Crop	Prunus_domestica_-Plum-	Boreal_Forest	Boreal	No	Yes	Chemical	4.35	6.58333	20.2564	919.669	21.3	-11.2	32.5	14.2667	-1.91667	15.6	-7.01667	634	81	31	32.4155	223	98	216	124
C620DM	2021-09-30	Europe	Russia	60.371077778	30.371113889	Crop	Pisum_sativum_-Pea-	Boreal_Forest	Boreal	No	Yes	Chemical	4.35	6.58333	20.2564	919.669	21.3	-11.2	32.5	14.2667	-1.91667	15.6	-7.01667	634	81	31	32.4155	223	98	216	124
C620E2	2021-09-30	Europe	Russia	60.371077778	30.371113889	Crop	Pisum_sativum_-Pea-	Boreal_Forest	Boreal	No	Yes	Chemical	4.35	6.58333	20.2564	919.669	21.3	-11.2	32.5	14.2667	-1.91667	15.6	-7.01667	634	81	31	32.4155	223	98	216	124
C620E3	2021-09-30	Europe	Russia	60.371077778	30.371113889	Crop	Allium_cepa_-Onion-	Boreal_Forest	Boreal	No	Yes	Chemical	4.35	6.58333	20.2564	919.669	21.3	-11.2	32.5	14.2667	-1.91667	15.6	-7.01667	634	81	31	32.4155	223	98	216	124
C620E6	2021-09-30	Europe	Russia	60.371077778	30.371113889	Crop	Allium_cepa_-Onion-	Boreal_Forest	Boreal	No	Yes	Chemical	4.35	6.58333	20.2564	919.669	21.3	-11.2	32.5	14.2667	-1.91667	15.6	-7.01667	634	81	31	32.4155	223	98	216	124
C620E8	2021-09-30	Europe	Russia	60.371077778	30.371113889	Crop	Brassica_oleracea_-Cabbage-	Boreal_Forest	Boreal	No	Yes	Chemical	4.35	6.58333	20.2564	919.669	21.3	-11.2	32.5	14.2667	-1.91667	15.6	-7.01667	634	81	31	32.4155	223	98	216	124
C620DR	2021-09-30	Europe	Russia	60.371077778	30.371113889	Crop	Calystegia_sepium	Boreal_Forest	Boreal	No	Yes	Chemical	4.35	6.58333	20.2564	919.669	21.3	-11.2	32.5	14.2667	-1.91667	15.6	-7.01667	634	81	31	32.4155	223	98	216	124
C620E5	2021-09-30	Europe	Russia	60.371077778	30.371113889	Crop	Calystegia_sepium	Boreal_Forest	Boreal	No	Yes	Chemical	4.35	6.58333	20.2564	919.669	21.3	-11.2	32.5	14.2667	-1.91667	15.6	-7.01667	634	81	31	32.4155	223	98	216	124
C620EE	2021-09-30	Europe	Russia	60.371077778	30.371113889	Crop	Clematis_vitalba	Boreal_Forest	Boreal	No	Yes	Chemical	4.35	6.58333	20.2564	919.669	21.3	-11.2	32.5	14.2667	-1.91667	15.6	-7.01667	634	81	31	32.4155	223	98	216	124
C620DO	2021-09-30	Europe	Russia	60.371077778	30.371113889	Crop	Daucus_carota_-Carrot-	Boreal_Forest	Boreal	No	Yes	Chemical	4.35	6.58333	20.2564	919.669	21.3	-11.2	32.5	14.2667	-1.91667	15.6	-7.01667	634	81	31	32.4155	223	98	216	124
C620DP	2021-09-30	Europe	Russia	60.387741667	30.371419444	Crop	Daucus_carota_-Carrot-	Boreal_Forest	Boreal	No	Yes	Chemical	4.3375	6.55833	20.1795	919.983	21.3	-11.2	32.5	14.2333	-1.91667	15.6	-7.05	636	81	31	31.8996	223	99	216	124
C620E4	2021-09-30	Europe	Russia	60.371077778	30.371113889	Crop	Daucus_carota_-Carrot-	Boreal_Forest	Boreal	No	Yes	Chemical	4.35	6.58333	20.2564	919.669	21.3	-11.2	32.5	14.2667	-1.91667	15.6	-7.01667	634	81	31	32.4155	223	98	216	124
C620DS	2021-09-30	Europe	Russia	60.371077778	30.371113889	Crop	Fragaria_√ó_ananassa_-Strawberry-	Boreal_Forest	Boreal	No	Yes	Chemical	4.35	6.58333	20.2564	919.669	21.3	-11.2	32.5	14.2667	-1.91667	15.6	-7.01667	634	81	31	32.4155	223	98	216	124
C620E0	2021-09-30	Europe	Russia	60.371077778	30.371113889	Crop	Fragaria_√ó_ananassa_-Strawberry-	Boreal_Forest	Boreal	No	Yes	Chemical	4.35	6.58333	20.2564	919.669	21.3	-11.2	32.5	14.2667	-1.91667	15.6	-7.01667	634	81	31	32.4155	223	98	216	124
C620E7	2021-09-30	Europe	Russia	60.371077778	30.371113889	Crop	Fragaria_√ó_ananassa_-Strawberry-	Boreal_Forest	Boreal	No	Yes	Chemical	4.35	6.58333	20.2564	919.669	21.3	-11.2	32.5	14.2667	-1.91667	15.6	-7.01667	634	81	31	32.4155	223	98	216	124
C620DN	2021-09-30	Europe	Russia	60.371077778	30.371113889	Crop	Solanum_tuberosum_-Potato-	Boreal_Forest	Boreal	No	Yes	Chemical	4.35	6.58333	20.2564	919.669	21.3	-11.2	32.5	14.2667	-1.91667	15.6	-7.01667	634	81	31	32.4155	223	98	216	124
C620DQ	2021-09-30	Europe	Russia	60.387741667	30.371419444	Crop	Solanum_tuberosum_-Potato-	Boreal_Forest	Boreal	No	Yes	Chemical	4.3375	6.55833	20.1795	919.983	21.3	-11.2	32.5	14.2333	-1.91667	15.6	-7.05	636	81	31	31.8996	223	99	216	124
C620DX	2021-09-30	Europe	Russia	60.371077778	30.371113889	Crop	Chaenomeles_japonica	Boreal_Forest	Boreal	No	Yes	Chemical	4.35	6.58333	20.2564	919.669	21.3	-11.2	32.5	14.2667	-1.91667	15.6	-7.01667	634	81	31	32.4155	223	98	216	124
C620EC	2021-09-30	Europe	Russia	60.371077778	30.371113889	Crop	Hortensia_arborescens	Boreal_Forest	Boreal	No	Yes	Chemical	4.35	6.58333	20.2564	919.669	21.3	-11.2	32.5	14.2667	-1.91667	15.6	-7.01667	634	81	31	32.4155	223	98	216	124
C620DT	2021-09-30	Europe	Russia	60.371077778	30.371113889	Crop	Rhododendron_dauricum	Boreal_Forest	Boreal	No	Yes	Chemical	4.35	6.58333	20.2564	919.669	21.3	-11.2	32.5	14.2667	-1.91667	15.6	-7.01667	634	81	31	32.4155	223	98	216	124
C620GH	2021-10-14	South Africa	South Africa	-34.337138889	20.434305556	Crop	Triticum_aestivum_-Wheat-	Shrublands	Shrublands	No_data	No_data	No_data	17.6917	11.45	52.765	376.9	29.1	7.4	21.7	13.0333	22.15	22.1833	13.0333	434	51	23	26.3331	139	79	80	139
C620GL	2021-10-14	South Africa	South Africa	-34.332638889	20.451055556	Crop	Brassica_napus_-Rapeseed-	Shrublands	Shrublands	No_data	No_data	No_data	17.8292	11.4417	52.7266	377.681	29.2	7.5	21.7	13.1667	21.25	22.3333	13.1667	428	50	23	25.9601	137	78	79	137
C620GN	2021-10-28	South Africa	South Africa	-33.276361111	18.706611111	Crop	Triticum_aestivum_-Wheat-	Shrublands	Shrublands	No_data	No_data	No_data	18.05	12.3167	53.0891	412.834	30.7	7.5	23.2	13.9667	22.8833	22.8833	12.9333	451	77	11	65.1703	213	40	40	211
C620GF	2021-10-28	South Africa	South Africa	-32.542138889	19.024500000	Crop	Citrus_spp._-Clementine-	Shrublands	Shrublands	No_data	No_data	No_data	18.55	14.1833	53.1211	470.237	32.8	6.1	26.7	12.6833	23.9833	23.9833	12.6833	295	52	7	63.8041	141	25	25	141
C620GK	2021-10-28	South Africa	South Africa	-33.593444444	18.931750000	Crop	Prunus_persica_-Peach-	Shrublands	Shrublands	No_data	No_data	No_data	18.0833	12.2667	51.325	429.827	30.8	6.9	23.9	12.7167	23.1167	23.1167	12.7167	615	105	16	65.3634	291	56	56	291
C620GG	2021-10-28	South Africa	South Africa	-33.283222222	18.719277778	Crop	Mediago_sativa_-Alfalfa-	Shrublands	Shrublands	No_data	No_data	No_data	17.75	12.4	52.9915	415.545	30.5	7.1	23.4	13.6333	22.6167	22.6167	12.6	466	78	12	64.2709	219	43	43	217
C620GJ	2021-10-28	South Africa	South Africa	-32.550333333	19.025138889	Crop	Camellia_sinensis_-Tea-	Shrublands	Shrublands	No_data	No_data	No_data	18.4167	14.0833	53.1447	466.414	32.5	6	26.5	12.6	23.8167	23.8167	12.6	294	52	7	63.707	141	25	25	141
C620GI	2021-10-29	South Africa	South Africa	-34.246777778	19.094833333	Crop	Malus_domestica_-Apple-	Shrublands	Shrublands	No_data	No_data	No_data	16.1125	9.99167	53.7186	312.244	25.7	7.1	18.6	12.2667	19.8833	19.8833	12.2667	775	114	25	54.0987	335	79	79	335
C620GM	2021-11-15	South Africa	South Africa	-33.948527778	18.706750000	Crop	Brassica_oleracea_-Broccoli-	Shrublands	Shrublands	No_data	No_data	No_data	17.2667	11.2833	53.2233	366.49	28.4	7.2	21.2	12.6833	21.6	21.6	12.6833	650	108	17	64.709	306	58	58	306
C620GE	2021-11-15	South Africa	South Africa	-33.947555556	18.706416667	Crop	Cucurbita_maxima_-Squash-	Shrublands	Shrublands	No_data	No_data	No_data	17.2667	11.2833	53.2233	366.49	28.4	7.2	21.2	12.6833	21.6	21.6	12.6833	650	108	17	64.709	306	58	58	306
C6205C	2021-02-27	Europe	Spain	41.6585	-3.80364	Crop	Hordeum_vulgare_-Barley-	Mediterranean_forest	Mediterranean	Yes	Yes	Chemical	11.8708	11.775	39.5134	650.533	29.2	-0.6	29.8	7.98333	20.1	20.25	4.38333	367	42	12	30.021	113	53	63	103
C6205D	2021-02-27	Europe	Spain	41.64503	-3.78752	Crop	Hordeum_vulgare_-Barley-	Mediterranean_forest	Mediterranean	Yes	Yes	Chemical	11.8083	11.8	39.4649	653.163	29.3	-0.6	29.9	7.91667	20.0833	20.2333	4.3	378	43	13	29.6438	116	55	64	106
C6205E	2021-02-27	Europe	Spain	41.64461	-3.77149	Crop	Hordeum_vulgare_-Barley-	Mediterranean_forest	Mediterranean	Yes	Yes	Chemical	11.775	11.85	39.5	655.028	29.3	-0.7	30	13.7667	20.0833	20.2333	4.25	380	42	13	29.3138	116	56	65	106
C6205F	2021-02-27	Europe	Spain	41.6417	-3.79879	Crop	Hordeum_vulgare_-Barley-	Mediterranean_forest	Mediterranean	Yes	Yes	Chemical	11.7208	11.7583	39.3255	653.242	29.2	-0.7	29.9	13.7167	20	20.15	4.21667	381	44	13	30.0341	118	55	65	106
C6205H	2021-02-27	Europe	Spain	41.65461	-3.76869	Crop	Triticum_aestivum_-Wheat-	Mediterranean_forest	Mediterranean	Yes	Yes	Chemical	11.8	11.8333	39.4444	654.783	29.3	-0.7	30	13.8	20.1	20.25	4.28333	374	42	13	29.0071	114	55	64	105
C6205G	2021-02-27	Europe	Spain	41.65986	-3.76901	Crop	Vicia_sativa_-Vetch-	Mediterranean_forest	Mediterranean	Yes	Yes	Chemical	11.8875	11.8583	39.5278	652.339	29.4	-0.6	30	7.96667	20.15	20.3	4.38333	368	42	12	29.4498	113	54	62	103
C6205A	2021-02-27	Europe	Spain	41.6657	-3.77591	Crop	Other	Mediterranean_forest	Mediterranean	No	Yes	Chemical	11.8875	11.8583	39.5278	652.339	29.4	-0.6	30	7.96667	20.15	20.3	4.38333	368	42	12	29.4498	113	54	62	103
C6205B	2021-02-27	Europe	Spain	41.66522	-3.77593	Crop	Other	Mediterranean_forest	Mediterranean	No	Yes	Organic	11.8875	11.8583	39.5278	652.339	29.4	-0.6	30	7.96667	20.15	20.3	4.38333	368	42	12	29.4498	113	54	62	103
C62051	2021-03-09	Europe	Spain	40.930233	-5.7365883	Crop	Triticum_aestivum_-Wheat-	Mediterranean_forest	Mediterranean	Yes	Yes	Chemical	11.7083	11.3833	38.984	630.641	29.1	-0.1	29.2	5.33333	19.8833	19.8833	4.63333	635	84	15	42.1715	234	68	68	228
C62050	2021-03-09	Europe	Spain	40.9331193	-5.7339473	Natural	Quercus_ilex_-Spanish_Oak-	Mediterranean_forest	Mediterranean	No	No	No_data	11.7083	11.3833	38.984	630.641	29.1	-0.1	29.2	5.33333	19.8833	19.8833	4.63333	635	84	15	42.1715	234	68	68	228
C620AQ	2021-03-09	Europe	Spain	40.93269	-5.73318	Natural	Quercus_ilex_-Spanish_Oak-	Mediterranean_forest	Mediterranean	No	No	No_data	11.75	11.45	39.0785	630.516	29.2	-0.1	29.3	5.36667	19.9167	19.9333	4.66667	626	83	15	41.8571	230	68	75	224
C6204R	2021-03-09	Europe	Spain	41.0512108	-5.6772263	Crop	Olea_europea_-Olive-	Mediterranean_forest	Mediterranean	Yes	Yes	Organic	12.0125	11.825	40.4966	617.356	29.2	0	29.2	5.63333	19.9333	19.95	4.96667	565	72	15	39.3248	203	66	71	197
C6204Y	2021-03-09	Europe	Spain	41.050956	-5.6775736	Crop	Prunus_persica_-Peach-	Mediterranean_forest	Mediterranean	Yes	Yes	Organic	12.0125	11.825	40.4966	617.356	29.2	0	29.2	5.63333	19.9333	19.95	4.96667	565	72	15	39.3248	203	66	71	197
C6204Q	2021-03-09	Europe	Spain	41.0510063	-5.6776169	Crop	Pyrus_communis_-Pear-	Mediterranean_forest	Mediterranean	Yes	Yes	Organic	12.0125	11.825	40.4966	617.356	29.2	0	29.2	5.63333	19.9333	19.95	4.96667	565	72	15	39.3248	203	66	71	197
C6204N	2021-03-12	Europe	Spain	41.0550342	-5.6765886	Crop	Triticum_aestivum_-Wheat-	Mediterranean_forest	Mediterranean	Yes	Yes	Chemical	12.0125	11.825	40.4966	617.356	29.2	0	29.2	5.63333	19.9333	19.95	4.96667	565	72	15	39.3248	203	66	71	197
C6204O	2021-03-12	Europe	Spain	41.0509802	-5.6659382	Crop	Triticum_aestivum_-Wheat-	Mediterranean_forest	Mediterranean	Yes	Yes	Chemical	12.0542	11.9417	40.6179	619.752	29.4	0	29.4	5.66667	20.0167	20.0167	4.98333	547	70	14	39.4288	196	64	64	190
C6204E	2021-03-12	Europe	Spain	39.7221736	-5.9665361	Natural	Quercus_ilex_-Spanish_Oak-	Mediterranean_forest	Mediterranean	No	No	No_data	15.4875	10.9917	37.6427	644.149	32.5	3.3	29.2	9.01667	23.8667	23.8667	8.23333	527	76	6	52.0522	214	39	39	199
C6204L	2021-03-12	Europe	Spain	39.7309742	-5.9838222	Natural	Quercus_ilex_-Spanish_Oak-	Mediterranean_forest	Mediterranean	No	No	No_data	15.7167	11	37.5427	644.248	32.8	3.5	29.3	9.23333	24.0833	24.0833	8.43333	520	75	6	51.4125	210	40	40	194
C6204M	2021-03-12	Europe	Spain	39.7218714	-5.9665843	Natural	Quercus_ilex_-Spanish_Oak-	Mediterranean_forest	Mediterranean	No	No	No_data	15.4875	10.9917	37.6427	644.149	32.5	3.3	29.2	9.01667	23.8667	23.8667	8.23333	527	76	6	52.0522	214	39	39	199
C6204V	2021-03-12	Europe	Spain	39.7234215	-5.9690459	Natural	Quercus_ilex_-Spanish_Oak-	Mediterranean_forest	Mediterranean	No	No	No_data	15.5792	11.0083	37.5711	645.183	32.6	3.3	29.3	9.1	23.9667	23.9667	8.3	525	75	6	51.7805	212	39	39	197
C6204X	2021-03-12	Europe	Spain	39.7308646	-5.9841008	Natural	Quercus_ilex_-Spanish_Oak-	Mediterranean_forest	Mediterranean	No	No	No_data	15.7167	11	37.5427	644.248	32.8	3.5	29.3	9.23333	24.0833	24.0833	8.43333	520	75	6	51.4125	210	40	40	194
C62052	2021-03-12	Europe	Spain	39.7207421	-5.9605775	Natural	Quercus_ilex_-Spanish_Oak-	Mediterranean_forest	Mediterranean	No	No	No_data	15.4875	10.9917	37.6427	644.149	32.5	3.3	29.2	9.01667	23.8667	23.8667	8.23333	527	76	6	52.0522	214	39	39	199
C6204Z	2021-03-12	Europe	Spain	39.7036671	-5.9747701	Crop	Olea_europea_-Olive-	Mediterranean_forest	Mediterranean	Yes	No_data	No_data	15.3417	10.95	37.2449	648.778	32.5	3.1	29.4	8.85	23.8	23.8	8.05	545	79	6	52.1076	222	41	41	206
C6204C	2021-03-12	Europe	Spain	41.0515944	-5.6547105	Crop	Lens_culinaris_-Lentil-	Mediterranean_forest	Mediterranean	Yes	Yes	Chemical	12.0583	11.9833	40.6215	621.932	29.5	0	29.5	5.63333	20.05	20.05	4.96667	541	69	14	39.0537	194	64	64	187
C6204U	2021-03-12	Europe	Spain	41.0538977	-5.6773175	Crop	Lens_culinaris_-Lentil-	Mediterranean_forest	Mediterranean	Yes	Yes	Chemical	12.0125	11.825	40.4966	617.356	29.2	0	29.2	5.63333	19.9333	19.95	4.96667	565	72	15	39.3248	203	66	71	197
C620AK	2021-03-14	Europe	Spain	41.708719	-5.527184	Crop	Secale_cereale_-Rye-	Mediterranean_forest	Mediterranean	Yes	Yes	Chemical	12.525	11.6667	40.2299	617.718	29.4	0.4	29	6.11667	20.4667	20.4667	5.45	561	71	17	36.9499	198	70	70	190
C6209V	2021-03-14	Europe	Spain	41.726289	-5.546709	Crop	Triticum_aestivum_-Wheat-	Mediterranean_forest	Mediterranean	Yes	Yes	Chemical	12.45	11.6167	40.1961	616.707	29.3	0.4	28.9	6.06667	20.3833	20.3833	5.38333	568	73	18	37.1821	202	72	72	194
C620A2	2021-03-14	Europe	Spain	41.728483	-5.550335	Crop	Triticum_aestivum_-Wheat-	Mediterranean_forest	Mediterranean	Yes	Yes	Chemical	12.4417	11.6	40.1384	617.55	29.3	0.4	28.9	6.05	20.3833	20.3833	5.38333	570	73	18	37.2641	202	72	72	194
C620A5	2021-03-14	Europe	Spain	41.707229	-5.5286	Natural	Pinus_pinea	Mediterranean_forest	Mediterranean	No	No	No_data	12.5083	11.6833	40.2874	617.87	29.4	0.4	29	6.11667	20.4667	20.4667	5.43333	563	71	17	36.8464	198	71	71	190
C620A8	2021-03-14	Europe	Spain	41.707461	-5.528826	Natural	Quercus_faginea	Mediterranean_forest	Mediterranean	No	No	No_data	12.5083	11.6833	40.2874	617.87	29.4	0.4	29	6.11667	20.4667	20.4667	5.43333	563	71	17	36.8464	198	71	71	190
C62043	2021-03-14	Europe	Spain	41.1080882	-6.7486203	Crop	Citrus_spp._-Clementine-	Mediterranean_forest	Mediterranean	Yes	Yes	Organic	14.3292	9.875	41.318	499.534	27.6	3.7	23.9	8.61667	20.6333	20.8	8.61667	1042	152	14	55.638	439	75	83	439
C62042	2021-03-14	Europe	Spain	41.1079503	-6.7494243	Crop	Olea_europea_-Olive-	Mediterranean_forest	Mediterranean	Yes	No	No_data	14.3292	9.875	41.318	499.534	27.6	3.7	23.9	8.61667	20.6333	20.8	8.61667	1042	152	14	55.638	439	75	83	439
C6204A	2021-03-14	Europe	Spain	41.1079847	-6.7491115	Crop	Olea_europea_-Olive-	Mediterranean_forest	Mediterranean	No	Yes	Organic	14.3292	9.875	41.318	499.534	27.6	3.7	23.9	8.61667	20.6333	20.8	8.61667	1042	152	14	55.638	439	75	83	439
C62046	2021-03-14	Europe	Spain	41.1072877	-6.7259238	Crop	Pyrus_communis_-Pear-	Mediterranean_forest	Mediterranean	Yes	Yes	Organic	13.1708	9.75833	39.3481	538.375	27.3	2.5	24.8	7.15	20.0667	20.2167	7.15	1064	158	16	55.71	453	81	84	453
C620A4	2021-03-14	Europe	Spain	41.707597	-5.527431	Crop	Pistaccia_vera_-Pistachio-	Mediterranean_forest	Mediterranean	No	Yes	Organic	12.5083	11.6833	40.2874	617.87	29.4	0.4	29	6.11667	20.4667	20.4667	5.43333	563	71	17	36.8464	198	71	71	190
C6204G	2021-03-14	Europe	Spain	41.0837227	-6.7081296	Crop	Prunus_dulcis_-Almond-	Mediterranean_forest	Mediterranean	No	Yes	Organic	12.8292	9.99167	39.183	549.824	27.5	2	25.5	6.7	19.9	20.05	6.7	1067	159	17	55.7009	455	83	84	455
C6204K	2021-03-14	Europe	Spain	41.077163	-6.7183549	Crop	Prunus_dulcis_-Almond-	Mediterranean_forest	Mediterranean	No	Yes	Organic	12.9125	9.85833	38.9657	545.365	27.4	2.1	25.3	6.83333	19.9167	20.0667	6.83333	1060	158	16	55.7424	452	82	83	452
C62057	2021-03-14	Europe	Spain	41.1076088	-6.7261206	Crop	Prunus_dulcis_-Almond-	Mediterranean_forest	Mediterranean	Yes	Yes	Organic	13.1708	9.75833	39.3481	538.375	27.3	2.5	24.8	7.15	20.0667	20.2167	7.15	1064	158	16	55.71	453	81	84	453
C62040	2021-03-14	Europe	Spain	41.1076348	-6.7264682	Natural	Pasture	Mediterranean_forest	Mediterranean	No	No	No_data	13.1708	9.75833	39.3481	538.375	27.3	2.5	24.8	7.15	20.0667	20.2167	7.15	1064	158	16	55.71	453	81	84	453
C6204I	2021-03-14	Europe	Spain	41.1285082	-6.7527948	Natural	Pasture	Mediterranean_forest	Mediterranean	No	Yes	Organic	13.7042	9.725	40.0206	521.159	27.4	3.1	24.3	7.83333	20.35	20.5	7.83333	1058	156	15	55.7657	449	79	84	449
C6204T	2021-03-14	Europe	Spain	41.1282645	-6.7518584	Natural	Pasture	Mediterranean_forest	Mediterranean	No	Yes	Organic	13.7042	9.725	40.0206	521.159	27.4	3.1	24.3	7.83333	20.35	20.5	7.83333	1058	156	15	55.7657	449	79	84	449
C620A6	2021-03-14	Europe	Spain	41.713064	-5.521507	Crop	Brassica_napus_-Rapeseed-	Mediterranean_forest	Mediterranean	Yes	Yes	Chemical	12.4917	11.65	40.1724	616.861	29.4	0.4	29	6.11667	20.45	20.45	5.43333	564	71	17	36.7239	198	71	71	190
C620A9	2021-03-14	Europe	Spain	41.709463	-5.52759	Crop	Vitis_vinifera_-Vine-	Mediterranean_forest	Mediterranean	Yes	No	No_data	12.525	11.6667	40.2299	617.718	29.4	0.4	29	6.11667	20.4667	20.4667	5.45	561	71	17	36.9499	198	70	70	190
C62011	2021-04-01	Europe	Spain	37.1421823	-3.7332547	Crop	Hordeum_vulgare_-Barley-	Mediterranean_forest	Mediterranean	Yes	Yes	Chemical	16.1083	14.0167	43.3953	640.503	34.6	2.3	32.3	9.66667	24.4	24.4	8.86667	401	56	2	55.4964	160	21	21	151
C6201D	2021-04-01	Europe	Spain	37.182732	-3.704142	Natural	Populus_spp._-Poplar-	Mediterranean_forest	Mediterranean	No	No	No_data	16.3667	13.6	43.7299	620.836	33.9	2.8	31.1	10.0667	24.35	24.35	9.28333	380	54	2	54.657	152	21	21	143
C62013	2021-04-01	Europe	Spain	37.1660801	-3.7128797	Crop	Olea_europea_-Olive-	Mediterranean_forest	Mediterranean	No_data	No_data	No_data	16.1875	13.6583	43.7767	623.765	33.8	2.6	31.2	9.83333	24.2167	24.2167	9.06667	388	54	2	54.5327	154	21	21	145
C62018	2021-04-01	Europe	Spain	37.1173641	-3.7317534	Crop	Prunus_dulcis_-Almond-	Mediterranean_forest	Mediterranean	No_data	No_data	No_data	16.0542	14.3417	43.3283	654.201	35.3	2.2	33.1	9.55	24.5667	24.5667	8.71667	404	57	2	55.641	162	21	21	154
C6201I	2021-04-03	Europe	Spain	37.1772133	-3.662261	Crop	Allium_ampeloprasum_-Leek-	Mediterranean_forest	Mediterranean	No_data	No_data	No_data	16.375	13.7333	43.7367	627.066	34.1	2.7	31.4	9.96667	24.4333	24.4333	9.21667	382	54	2	54.5885	153	21	21	143
C62014	2021-04-03	Europe	Spain	37.1758432	-3.6630023	Crop	Asparagus_officinalis	Mediterranean_forest	Mediterranean	No_data	No_data	No_data	16.375	13.7333	43.7367	627.066	34.1	2.7	31.4	9.96667	24.4333	24.4333	9.21667	382	54	2	54.5885	153	21	21	143
C62012	2021-04-19	Europe	Spain	37.9081155	-4.7369799	Crop	Phaseolus_vulgaris_-Bean-	Mediterranean_forest	Mediterranean	No_data	No_data	No_data	17.7292	13.2583	41.9568	650.459	35.6	4	31.6	11	25.95	26.1167	10.2333	530	86	4	61.6454	235	27	32	205
C6207E	2021-05-10	Europe	Spain	41.759173	-5.591233	Crop	Triticum_aestivum_-Wheat-	Mediterranean_forest	Mediterranean	Yes	Yes	Chemical	12.3333	11.4333	39.8374	616.111	29.1	0.4	28.7	5.98333	20.2667	20.2667	5.28333	584	75	18	37.6612	208	73	73	200
C6207J	2021-05-10	Europe	Spain	41.734486	-5.571149	Crop	Triticum_aestivum_-Wheat-	Mediterranean_forest	Mediterranean	Yes	Yes	Chemical	12.4292	11.5583	39.9942	617.828	29.3	0.4	28.9	6.05	20.3833	20.3833	5.35	579	74	18	37.3809	205	73	73	197
C6207K	2021-05-10	Europe	Spain	41.760429	-5.589763	Crop	Triticum_aestivum_-Wheat-	Mediterranean_forest	Mediterranean	Yes	Yes	Chemical	12.3333	11.4333	39.8374	616.111	29.1	0.4	28.7	5.98333	20.2667	20.2667	5.28333	584	75	18	37.6612	208	73	73	200
C6207L	2021-05-10	Europe	Spain	41.749092	-5.571707	Crop	Triticum_aestivum_-Wheat-	Mediterranean_forest	Mediterranean	Yes	Yes	Chemical	12.4042	11.575	40.0519	617.265	29.2	0.3	28.9	6.01667	20.35	20.35	5.33333	576	74	18	37.6207	205	73	73	197
C62006	2021-05-16	Europe	Spain	40.1788611	-5.81719444	Crop	Prunus_cerasus_-Cherry-	Mediterranean_forest	Mediterranean	Yes	No_data	No_data	14.0208	10.525	38.8376	589.215	29.4	2.3	27.1	8.03333	21.65	21.65	7.3	581	79	9	47.6337	223	49	49	216
C62019	2021-05-16	Europe	Spain	37.095886	-5.641219	Crop	Cicer_arietinum_-Chickpea-	Mediterranean_forest	Mediterranean	No	No	No_data	17.5	12.1833	44.6276	534.16	32.9	5.6	27.3	12.35	24.0667	24.6333	11.4333	598	100	1	69.1143	271	17	20	250
C6201H	2021-05-16	Europe	Spain	37.088692	-5.608666	Crop	Helianthus_annuus_-Sunflower-	Mediterranean_forest	Mediterranean	Yes	Yes	Chemical	17.3958	12.1583	44.6998	535.335	32.8	5.6	27.2	12.25	23.9833	24.55	11.3333	607	101	1	69.0689	274	16	21	254
C6201T	2021-05-17	Europe	Spain	37.149102	-3.587007	Crop	Triticum_aestivum_-Wheat-	Mediterranean_forest	Mediterranean	No_data	No_data	No_data	15.7667	13.15	41.746	646.224	33.9	2.4	31.5	9.3	24.1667	24.1667	8.46667	402	55	3	52.604	157	25	25	148
C6201P	2021-05-17	Europe	Spain	37.174307	-3.617751	Crop	Zea_mays_-Corn-	Mediterranean_forest	Mediterranean	No_data	No_data	No_data	16.3042	13.3083	42.5186	641.467	34.2	2.9	31.3	9.81667	24.6	24.6	9.05	390	54	3	53.4366	153	23	23	144
C6201N	2021-05-17	Europe	Spain	37.239473	-3.62388	Crop	Olea_europea_-Olive-	Mediterranean_forest	Mediterranean	No_data	No_data	No_data	15.7625	13.6583	42.1554	659.67	34.6	2.2	32.4	9.15	24.35	24.35	8.36667	408	56	3	52.908	160	25	25	149
C6201Y	2021-05-17	Europe	Spain	37.177433	-3.655412	Crop	Prunus_cerasus_-Cherry-	Mediterranean_forest	Mediterranean	No_data	No_data	No_data	16.3833	13.6833	43.7167	629.138	34.1	2.8	31.3	9.98333	24.4833	24.4833	9.2	384	54	3	54.0071	153	22	22	143
C6200G	2021-05-17	Europe	Spain	40.1766111	-5.81891667	Crop	Prunus_cerasus_-Cherry-	Mediterranean_forest	Mediterranean	Yes	No_data	No_data	14.0208	10.525	38.8376	589.215	29.4	2.3	27.1	8.03333	21.65	21.65	7.3	581	79	9	47.6337	223	49	49	216
C6201X	2021-05-17	Europe	Spain	37.167695	-3.627341	Crop	Allium_cepa_-Onion-	Mediterranean_forest	Mediterranean	No_data	No_data	No_data	16.3167	13.4	42.8115	636.472	34.1	2.8	31.3	9.86667	24.5333	24.5333	9.08333	388	54	3	53.4569	153	23	23	144
C6201B	2021-05-17	Europe	Spain	37.18568	-3.672972	Crop	Asparagus_officinalis	Mediterranean_forest	Mediterranean	No_data	No_data	No_data	16.425	13.7	43.6306	629.388	34.2	2.8	31.4	10.0333	24.5167	24.5167	9.26667	381	54	2	54.4992	152	21	21	143
C6201A	2021-05-17	Europe	Spain	37.14392	-3.572785	Crop	Cynara_scolymus_-Artichoke-	Mediterranean_forest	Mediterranean	No_data	No_data	No_data	15.4042	13.075	41.3766	649.704	33.7	2.1	31.6	8.95	23.8667	23.8667	8.1	408	56	3	53.0061	160	25	25	151
C6201M	2021-05-17	Europe	Spain	37.143195	-3.57411	Crop	Solanum_tuberosum_-Potato-	Mediterranean_forest	Mediterranean	No_data	No_data	No_data	15.4042	13.075	41.3766	649.704	33.7	2.1	31.6	8.95	23.8667	23.8667	8.1	408	56	3	53.0061	160	25	25	151
C6201U	2021-05-17	Europe	Spain	37.145885	-3.559364	Crop	Vitis_vinifera_-Vine-	Mediterranean_forest	Mediterranean	No_data	No_data	No_data	15.075	13.0333	41.2447	652.218	33.4	1.8	31.6	8.6	23.5667	23.5667	7.73333	419	58	3	53.4431	164	25	25	156
C62007	2021-05-18	Europe	Spain	40.17225	-5.81447222	Crop	Prunus_cerasus_-Cherry-	Mediterranean_forest	Mediterranean	Yes	No_data	No_data	12.5833	9.81667	36.9048	599.547	27.9	1.3	26.6	6.66667	20.45	20.45	5.9	696	98	12	48.8728	271	57	57	263
C6200K	2021-05-19	Europe	Spain	40.1796667	-5.82197222	Crop	Prunus_cerasus_-Cherry-	Mediterranean_forest	Mediterranean	Yes	No_data	No_data	14.0208	10.525	38.8376	589.215	29.4	2.3	27.1	8.03333	21.65	21.65	7.3	581	79	9	47.6337	223	49	49	216
C6200C	2021-05-20	Europe	Spain	40.1752778	-5.82858333	Crop	Prunus_cerasus_-Cherry-	Mediterranean_forest	Mediterranean	Yes	No_data	No_data	14.2333	10.65	39.2989	587.511	29.5	2.4	27.1	8.25	21.8167	21.8167	7.51667	569	77	8	47.5855	217	48	48	211
C62003	2021-05-21	Europe	Spain	40.16975	-5.82513889	Crop	Prunus_cerasus_-Cherry-	Mediterranean_forest	Mediterranean	Yes	No_data	No_data	13.75	10.4	38.5185	591.596	29.1	2.1	27	7.78333	21.4333	21.4333	7.03333	599	82	9	48.0309	230	50	50	224
C6200F	2021-05-22	Europe	Spain	40.1630278	-5.83986111	Crop	Prunus_cerasus_-Cherry-	Mediterranean_forest	Mediterranean	Yes	No_data	No_data	13.6958	10.375	38.4259	592.431	29	2	27	7.7	21.3667	21.3667	6.95	602	83	9	48.3838	233	50	50	226
C62015	2021-05-23	Europe	Spain	37.8700257	-4.8179303	Crop	Olea_europea_-Olive-	Mediterranean_forest	Mediterranean	No_data	No_data	No_data	17.85	13.1667	42.066	646.487	35.6	4.3	31.3	11.15	26	26.1833	10.4	536	87	3	62.729	241	26	31	209
C6200D	2021-05-23	Europe	Spain	40.1696944	-5.82516667	Crop	Prunus_cerasus_-Cherry-	Mediterranean_forest	Mediterranean	Yes	No_data	No_data	13.75	10.4	38.5185	591.596	29.1	2.1	27	7.78333	21.4333	21.4333	7.03333	599	82	9	48.0309	230	50	50	224
C62017	2021-05-23	Europe	Spain	37.8686971	-4.817234	Crop	Helianthus_annuus_-Sunflower-	Mediterranean_forest	Mediterranean	No_data	No_data	No_data	17.85	13.1667	42.066	646.487	35.6	4.3	31.3	11.15	26	26.1833	10.4	536	87	3	62.729	241	26	31	209
C6200P	2021-05-24	Europe	Spain	40.1644722	-5.83630556	Crop	Prunus_cerasus_-Cherry-	Mediterranean_forest	Mediterranean	Yes	No_data	No_data	13.6958	10.375	38.4259	592.431	29	2	27	7.7	21.3667	21.3667	6.95	602	83	9	48.3838	233	50	50	226
C62002	2021-05-25	Europe	Spain	40.1581111	-5.83105556	Crop	Prunus_cerasus_-Cherry-	Mediterranean_forest	Mediterranean	Yes	No_data	No_data	12.4042	9.70833	36.774	598.671	27.6	1.2	26.4	6.51667	20.2667	20.2667	5.73333	719	101	12	49.1304	280	58	58	272
C6204P	2021-05-26	Europe	Spain	41.000792	-5.343624	Crop	Triticum_aestivum_-Wheat-	Mediterranean_forest	Mediterranean	No_data	No_data	No_data	11.6833	11.8333	40.3868	624.734	28.9	-0.4	29.3	8.01667	19.6167	19.6833	4.5	425	49	14	32.7738	139	61	67	126
C62041	2021-05-26	Europe	Spain	40.996513	-5.342687	Natural	Quercus_ilex_-Spanish_Oak-	Mediterranean_forest	Mediterranean	No	No	No_data	11.7	11.8167	40.3299	625.002	28.9	-0.4	29.3	8.03333	19.6333	19.7167	4.51667	418	48	13	33.5482	138	59	64	124
C6204S	2021-05-26	Europe	Spain	40.999003	-5.343663	Natural	Quercus_ilex_-Spanish_Oak-	Mediterranean_forest	Mediterranean	No	No	No_data	11.7	11.8167	40.3299	625.002	28.9	-0.4	29.3	8.03333	19.6333	19.7167	4.51667	418	48	13	33.5482	138	59	64	124
C6204W	2021-05-26	Europe	Spain	40.998413	-5.34081	Natural	Quercus_ilex_-Spanish_Oak-	Mediterranean_forest	Mediterranean	No	No	No_data	11.7083	11.8333	40.113	627.139	29.1	-0.4	29.5	8.03333	19.6833	19.7667	4.51667	417	48	13	33.463	138	59	64	123
C6200R	2021-05-26	Europe	Spain	40.1578056	-5.83647222	Crop	Prunus_cerasus_-Cherry-	Mediterranean_forest	Mediterranean	Yes	No_data	No_data	12.9667	10	37.4532	597.69	28.2	1.5	26.7	7.01667	20.7667	20.7667	6.23333	665	93	11	49.0429	259	54	54	251
C62001	2021-05-27	Europe	Spain	40.1594722	-5.85394444	Crop	Prunus_cerasus_-Cherry-	Mediterranean_forest	Mediterranean	Yes	No_data	No_data	14.3042	10.725	39.5756	585.792	29.6	2.5	27.1	8.31667	21.8667	21.8667	7.6	566	77	8	47.8356	218	48	48	211
C62009	2021-05-28	Europe	Spain	40.1507778	-5.84530556	Crop	Prunus_cerasus_-Cherry-	Mediterranean_forest	Mediterranean	Yes	No_data	No_data	13.6208	10.3083	38.3209	593.148	28.9	2	26.9	7.61667	21.3167	21.3167	6.86667	609	84	9	48.796	236	49	49	229
C6200H	2021-05-29	Europe	Spain	40.1593056	-5.85408333	Crop	Prunus_cerasus_-Cherry-	Mediterranean_forest	Mediterranean	Yes	No_data	No_data	14.3042	10.725	39.5756	585.792	29.6	2.5	27.1	8.31667	21.8667	21.8667	7.6	566	77	8	47.8356	218	48	48	211
C6200B	2021-05-30	Europe	Spain	40.1491667	-5.86827778	Crop	Prunus_cerasus_-Cherry-	Mediterranean_forest	Mediterranean	Yes	No_data	No_data	14.2792	10.575	39.0221	590.025	29.6	2.5	27.1	8.26667	21.9	21.9	7.51667	574	78	8	48.2215	222	48	48	215
C62045	2021-05-31	Europe	Spain	41.135607	-5.483868	Crop	Triticum_aestivum_-Wheat-	Mediterranean_forest	Mediterranean	No_data	No_data	No_data	11.7083	11.8667	40.226	627.733	29.2	-0.3	29.5	5.23333	19.7833	19.7833	4.56667	479	58	15	34.9765	163	64	70	153
C6204B	2021-05-31	Europe	Spain	41.133328	-5.483063	Natural	Quercus_ilex_-Spanish_Oak-	Mediterranean_forest	Mediterranean	No	No	No_data	11.75	11.9333	40.3153	626.593	29.3	-0.3	29.6	5.28333	19.8167	19.8167	4.61667	471	57	15	34.4768	159	64	64	149
C6200N	2021-05-31	Europe	Spain	40.1491389	-5.86847222	Crop	Prunus_cerasus_-Cherry-	Mediterranean_forest	Mediterranean	Yes	No_data	No_data	14.2792	10.575	39.0221	590.025	29.6	2.5	27.1	8.26667	21.9	21.9	7.51667	574	78	8	48.2215	222	48	48	215
C6200Y	2021-06-01	Europe	Spain	40.84712	-6.774578	Crop	Olea_europea_-Olive-	Mediterranean_forest	Mediterranean	Yes	No_data	No_data	13.6667	10	40.1606	533.042	27.8	2.9	24.9	7.63333	20.4667	20.6	7.63333	977	147	14	55.6758	413	73	76	413
C62005	2021-06-02	Europe	Spain	40.855047	-6.759847	Crop	Olea_europea_-Olive-	Mediterranean_forest	Mediterranean	Yes	No_data	No_data	13.2792	9.89167	39.5667	543.488	27.6	2.6	25	7.16667	20.25	20.3667	7.16667	983	148	15	55.6949	415	75	76	415
C62008	2021-06-03	Europe	Spain	40.863787	-6.760574	Crop	Olea_europea_-Olive-	Mediterranean_forest	Mediterranean	Yes	No_data	No_data	13.0917	9.88333	39.3758	547.228	27.5	2.4	25.1	6.96667	20.1	20.25	6.96667	992	149	15	55.5004	418	77	77	418
C620AY	2021-06-04	Europe	Spain	40.845161	-6.77008	Crop	Olea_europea_-Olive-	Mediterranean_forest	Mediterranean	No	No_data	No_data	13.6667	10	40.1606	533.042	27.8	2.9	24.9	7.63333	20.4667	20.6	7.63333	977	147	14	55.6758	413	73	76	413
C6200I	2021-06-05	Europe	Spain	40.859984	-6.763589	Crop	Olea_europea_-Olive-	Mediterranean_forest	Mediterranean	No	No_data	No_data	13.0917	9.88333	39.3758	547.228	27.5	2.4	25.1	6.96667	20.1	20.25	6.96667	992	149	15	55.5004	418	77	77	418
C6200V	2021-06-06	Europe	Spain	40.865056	-6.753984	Crop	Olea_europea_-Olive-	Mediterranean_forest	Mediterranean	No	No_data	No_data	13.1417	9.95	39.4841	545.331	27.6	2.4	25.2	7.03333	20.1333	20.2667	7.03333	995	150	15	55.5751	420	76	78	420
C620B3	2021-06-07	Europe	Spain	40.849905	-6.766191	Crop	Olea_europea_-Olive-	Mediterranean_forest	Mediterranean	Yes	No_data	No_data	13.5708	9.975	40.0602	535.458	27.7	2.8	24.9	7.51667	20.4	20.5333	7.51667	980	148	14	55.9059	415	73	75	415
C6200L	2021-06-08	Europe	Spain	40.85992	-6.756427	Crop	Olea_europea_-Olive-	Mediterranean_forest	Mediterranean	Yes	No_data	No_data	13.1417	9.95	39.4841	545.331	27.6	2.4	25.2	7.03333	20.1333	20.2667	7.03333	995	150	15	55.5751	420	76	78	420
C62004	2021-06-09	Europe	Spain	40.868287	-6.746726	Crop	Olea_europea_-Olive-	Mediterranean_forest	Mediterranean	Yes	No_data	No_data	12.9042	9.975	39.4269	549.493	27.5	2.2	25.3	6.76667	19.9667	20.1167	6.76667	1004	150	16	54.7848	422	80	80	422
C6200Z	2021-06-10	Europe	Spain	40.996172	-6.865941	Crop	Prunus_dulcis_-Almond-	Mediterranean_forest	Mediterranean	Yes	No_data	No_data	13.5667	9.71667	39.8224	528.967	27.5	3.1	24.4	7.63333	20.35	20.4667	7.63333	1025	152	15	55.1544	430	78	81	430
C6200U	2021-06-11	Europe	Spain	40.996604	-6.874239	Crop	Prunus_dulcis_-Almond-	Mediterranean_forest	Mediterranean	No	No_data	No_data	13.7042	9.70833	39.952	524.814	27.5	3.2	24.3	7.8	20.4167	20.5333	7.8	1028	152	15	55.3307	431	77	81	431
C620AZ	2021-06-12	Europe	Spain	40.981215	-6.867552	Crop	Prunus_dulcis_-Almond-	Mediterranean_forest	Mediterranean	Yes	No_data	No_data	13.7333	9.78333	40.0956	526.21	27.6	3.2	24.4	7.81667	20.4667	20.5833	7.81667	1022	152	15	55.4103	430	77	81	430
C620AS	2021-06-13	Europe	Spain	40.985025	-6.872902	Crop	Prunus_dulcis_-Almond-	Mediterranean_forest	Mediterranean	No	No_data	No_data	13.675	9.71667	39.9863	526.098	27.5	3.2	24.3	7.76667	20.4	20.5333	7.76667	1022	152	15	55.3904	430	77	81	430
C6200S	2021-06-14	Europe	Spain	41.004854	-6.874559	Crop	Prunus_dulcis_-Almond-	Mediterranean_forest	Mediterranean	Yes	No_data	No_data	13.7125	9.65833	40.0761	521.062	27.4	3.3	24.1	7.85	20.3833	20.5	7.85	1031	153	15	55.446	433	77	81	433
C620B2	2021-06-15	Europe	Spain	41.003448	-6.883772	Crop	Prunus_dulcis_-Almond-	Mediterranean_forest	Mediterranean	No	No_data	No_data	13.9875	9.65833	40.4114	513.779	27.5	3.6	23.9	8.2	20.5333	20.6667	8.2	1031	153	15	55.3656	433	77	82	433
C620AU	2021-06-16	Europe	Spain	40.992302	-6.881928	Crop	Prunus_dulcis_-Almond-	Mediterranean_forest	Mediterranean	Yes	No_data	No_data	13.8708	9.70833	40.2835	518.628	27.5	3.4	24.1	8.01667	20.4833	20.6167	8.01667	1028	152	15	55.3307	431	77	81	431
C620AP	2021-06-17	Europe	Spain	40.99289	-6.890166	Crop	Prunus_dulcis_-Almond-	Mediterranean_forest	Mediterranean	No	No_data	No_data	14.0667	9.73333	40.7252	510.607	27.5	3.6	23.9	8.28333	20.5667	20.6833	8.28333	1027	153	14	55.6856	432	75	81	432
C6200X	2021-06-18	Europe	Spain	40.974224	-6.865909	Crop	Prunus_dulcis_-Almond-	Mediterranean_forest	Mediterranean	Yes	No_data	No_data	13.7375	9.80833	40.1981	525.288	27.6	3.2	24.4	7.81667	20.45	20.5833	7.81667	1021	152	15	55.348	429	77	81	429
C6200T	2021-06-19	Europe	Spain	40.974329	-6.85938	Crop	Prunus_dulcis_-Almond-	Mediterranean_forest	Mediterranean	No	No_data	No_data	13.7375	9.80833	40.1981	525.288	27.6	3.2	24.4	7.81667	20.45	20.5833	7.81667	1021	152	15	55.348	429	77	81	429
C6200E	2021-06-20	Europe	Spain	40.015658	-6.863407	Crop	Prunus_dulcis_-Almond-	Mediterranean_forest	Mediterranean	Yes	No_data	No_data	15.7458	10.2583	39.0051	577.784	30.8	4.5	26.3	9.93333	23.1833	23.2167	9.18333	674	98	7	55.8216	283	40	48	265
C620AX	2021-06-21	Europe	Spain	41.019012	-6.861752	Crop	Prunus_dulcis_-Almond-	Mediterranean_forest	Mediterranean	No	No_data	No_data	14.2625	9.70833	40.9634	501.036	27.5	3.8	23.7	8.56667	20.6	20.7667	8.56667	1028	153	14	55.7274	433	75	82	433
C620AA	2021-08-01	Europe	Spain	41.017594	-5.616881	Crop	Hordeum_vulgare_-Barley-	Mediterranean_forest	Mediterranean	No_data	No_data	No_data	11.9458	11.9583	40.2637	626.322	29.5	-0.2	29.7	5.48333	20.0167	20.0167	4.83333	520	65	15	36.9306	183	66	70	174
C620AL	2021-08-01	Europe	Spain	41.003327	-5.629523	Crop	Triticum_aestivum_-Wheat-	Mediterranean_forest	Mediterranean	Yes	No_data	No_data	12.0625	11.8417	40.1412	624.533	29.5	0	29.5	5.61667	20.0833	20.1333	4.96667	526	65	14	37.4542	184	65	70	175
C620AE	2021-08-01	Europe	Spain	41.07118	-5.707962	Crop	Cicer_arietinum_-Chickpea-	Mediterranean_forest	Mediterranean	Yes	No_data	No_data	11.9917	11.7667	40.2968	618.704	29.2	0	29.2	5.63333	19.9667	19.9667	4.95	588	76	15	40	213	68	68	208
C620AO	2021-08-01	Europe	Spain	41.014139	-5.65071	Crop	Lens_culinaris_-Lentil-	Mediterranean_forest	Mediterranean	Yes	No_data	No_data	12.1417	11.8833	40.2825	622.352	29.5	0	29.5	5.7	20.1167	20.15	5.03333	537	68	15	38.2712	191	65	70	184
C620AH	2021-08-01	Europe	Spain	41.2225	-6.510833	Crop	Prunus_dulcis_-Almond-	Mediterranean_forest	Mediterranean	No_data	No_data	No_data	12.3667	10.3833	38.7438	577.94	27.9	1.1	26.8	5.91667	19.9167	19.9167	5.91667	1073	159	17	55.3547	458	84	84	458
C620AM	2021-08-01	Europe	Spain	41.083636	-5.716637	Crop	Brassica_napus_-Rapeseed-	Mediterranean_forest	Mediterranean	Yes	No_data	No_data	12.0458	11.7917	40.2446	618.596	29.3	0	29.3	5.68333	20.0167	20.0167	5.01667	598	77	15	40.3144	216	68	68	211
C620AN	2021-08-01	Europe	Spain	41.083033	-5.712658	Crop	Helianthus_annuus_-Sunflower-	Mediterranean_forest	Mediterranean	Yes	No_data	No_data	12.0333	11.8	40.273	618.695	29.3	0	29.3	5.68333	20.0167	20.0167	5.01667	596	77	15	40.355	216	68	68	211
C620AG	2021-08-03	Europe	Spain	41.352344	-4.602752	Crop	Daucus_carota_-Carrot-	Mediterranean_forest	Mediterranean	No_data	No_data	No_data	12.075	12.1667	40.6912	637.625	29.5	-0.4	29.9	8.26667	20.15	20.25	4.73333	399	48	15	32.7056	130	60	66	114
C620AB	2021-08-03	Europe	Spain	41.9936156	-5.8990314	Crop	Solanum_tuberosum_-Potato-	Mediterranean_forest	Mediterranean	No_data	No_data	No_data	12.0625	11.2083	39.3275	609.598	28.4	-0.1	28.5	5.73333	19.9333	19.9333	5.03333	689	93	20	40.9638	254	81	81	247
C620AD	2021-08-03	Europe	Spain	41.352344	-4.602752	Crop	Solanum_tuberosum_-Potato-	Mediterranean_forest	Mediterranean	No_data	No_data	No_data	12.075	12.1667	40.6912	637.625	29.5	-0.4	29.9	8.26667	20.15	20.25	4.73333	399	48	15	32.7056	130	60	66	114
C6203Z	2021-08-09	Europe	Spain	40.29234	-6.8196	Crop	Zea_mays_-Corn-	Mediterranean_forest	Mediterranean	Yes	Yes	Organic	11.675	8.65	36.3445	555.446	25.4	1.6	23.8	6.4	19.0167	19.0167	5.5	938	139	12	54.5778	387	67	67	371
C6204H	2021-08-09	Europe	Spain	40.29427	-6.81799	Crop	Zea_mays_-Corn-	Mediterranean_forest	Mediterranean	Yes	Yes	Organic	11.675	8.65	36.3445	555.446	25.4	1.6	23.8	6.4	19.0167	19.0167	5.5	938	139	12	54.5778	387	67	67	371
C6203V	2021-08-09	Europe	Spain	40.29372	-6.81733	Crop	Solanum_tuberosum_-Potato-	Mediterranean_forest	Mediterranean	Yes	Yes	Organic	11.675	8.65	36.3445	555.446	25.4	1.6	23.8	6.4	19.0167	19.0167	5.5	938	139	12	54.5778	387	67	67	371
C62044	2021-08-09	Europe	Spain	40.30338	-6.80843	Crop	Solanum_tuberosum_-Potato-	Mediterranean_forest	Mediterranean	Yes	Yes	Organic	11.675	8.75	36.6109	553.692	25.4	1.5	23.9	6.38333	18.9833	18.9833	5.48333	932	138	12	54.5368	385	67	67	369
C62047	2021-08-09	Europe	Spain	40.29245	-6.8162	Crop	Solanum_tuberosum_-Potato-	Mediterranean_forest	Mediterranean	Yes	Yes	Organic	11.7208	8.675	36.2971	555.123	25.5	1.6	23.9	6.41667	19.05	19.05	5.51667	928	138	12	54.6389	384	67	67	368
C62049	2021-08-09	Europe	Spain	40.2924	-6.81667	Crop	Solanum_tuberosum_-Potato-	Mediterranean_forest	Mediterranean	Yes	Yes	Organic	11.675	8.65	36.3445	555.446	25.4	1.6	23.8	6.4	19.0167	19.0167	5.5	938	139	12	54.5778	387	67	67	371
C6204D	2021-08-09	Europe	Spain	40.29356	-6.81739	Crop	Solanum_tuberosum_-Potato-	Mediterranean_forest	Mediterranean	Yes	Yes	Organic	11.675	8.65	36.3445	555.446	25.4	1.6	23.8	6.4	19.0167	19.0167	5.5	938	139	12	54.5778	387	67	67	371
C62016	2021-09-01	Europe	Spain	38.48727778	-1.13419444	Crop	Pyrus_communis_-Pear-	Mediterranean_forest	Mediterranean	Yes	Yes	Organic	14.6667	13.1167	40.6089	682.45	33	0.7	32.3	12.7667	23.55	23.55	6.98333	373	47	10	36.3356	121	51	51	84
C6201E	2021-09-01	Europe	Spain	38.40013889	-1.38872222	Crop	Pyrus_communis_-Pear-	Mediterranean_forest	Mediterranean	Yes	Yes	Organic	15.8917	12.6667	40.9925	655.556	33.2	2.3	30.9	12.25	24.35	24.35	8.48333	327	45	7	38.8099	108	39	43	79
C6201F	2021-09-01	Europe	Spain	38.48136111	-1.34461111	Crop	Pyrus_communis_-Pear-	Mediterranean_forest	Mediterranean	Yes	Yes	Chemical	15.25	13.05	40.9091	677.314	33.3	1.4	31.9	15.9833	24.0333	24.0333	7.61667	345	45	8	37.2963	110	44	44	82
C6201G	2021-09-01	Europe	Spain	38.49452778	-1.36505556	Crop	Pyrus_communis_-Pear-	Mediterranean_forest	Mediterranean	Yes	Yes	Organic	14.9875	13.1083	40.7091	682.319	33.3	1.1	32.2	13.0833	23.8667	23.8667	7.31667	347	45	9	37.479	111	45	45	81
C6201J	2021-09-01	Europe	Spain	38.40005556	-1.38841667	Crop	Pyrus_communis_-Pear-	Mediterranean_forest	Mediterranean	Yes	Yes	Organic	15.8917	12.6667	40.9925	655.556	33.2	2.3	30.9	12.25	24.35	24.35	8.48333	327	45	7	38.8099	108	39	43	79
C6201L	2021-09-01	Europe	Spain	38.46127778	-1.35111111	Crop	Pyrus_communis_-Pear-	Mediterranean_forest	Mediterranean	Yes	Yes	Chemical	15.3792	12.9583	41.0074	670.764	33.2	1.6	31.6	13.5	24.0833	24.0833	7.81667	342	45	8	37.6228	109	43	43	81
C6201Q	2021-09-01	Europe	Spain	38.44830556	-1.25080556	Crop	Pyrus_communis_-Pear-	Mediterranean_forest	Mediterranean	Yes	Yes	Chemical	15.3417	12.8167	40.6878	669.769	33.1	1.6	31.5	16.1167	24.0167	24.0167	7.78333	338	45	8	37.4679	109	43	43	79
C6201S	2021-09-01	Europe	Spain	38.42036111	-1.38219444	Crop	Pyrus_communis_-Pear-	Mediterranean_forest	Mediterranean	Yes	Yes	Chemical	15.7667	12.5667	40.8009	655.329	33	2.2	30.8	12.15	24.2333	24.2333	8.36667	330	45	7	39.3148	108	39	39	79
C6201W	2021-09-01	Europe	Spain	38.45927778	-1.36027778	Crop	Pyrus_communis_-Pear-	Mediterranean_forest	Mediterranean	Yes	Yes	Organic	15.2958	12.975	40.9306	672.646	33.2	1.5	31.7	13.4167	24.0333	24.0333	7.71667	348	45	8	37.6319	112	44	44	82
C6204J	2021-10-08	Europe	Spain	43.14481	-4.81927	Natural	Fagus_sylvatica_-Beech-	Temperate_deciduous_forest	Temperate	No	Yes	Organic	7.69167	8.35	35.2321	552.107	21.4	-2.3	23.7	2.38333	14.8333	14.8333	1.41667	1011	111	47	27.0703	320	164	164	301
C6212X	2021-10-14	Europe	Spain	37.70119177	-1.09063482	Crop	Phaseolus_vulgaris_-Bean-	Mediterranean_forest	Mediterranean	Yes	Yes	Chemical	18.1917	12.6333	44.0186	586.48	33.6	4.9	28.7	19.2833	25.5833	25.8	11.5	295	43	4	43.3172	103	27	35	78
C6212Y	2021-10-14	Europe	Spain	37.69010919	-1.10249798	Crop	Pisum_sativum_-Pea-	Mediterranean_forest	Mediterranean	Yes	Yes	Chemical	17.9667	12.7	43.9446	592.266	33.5	4.6	28.9	14.85	25.4667	25.6333	11.2333	294	43	3	45.1948	104	24	32	80
C6212W	2021-10-14	Europe	Spain	37.70465675	-1.08035997	Crop	Brassica_oleracea_-Broccoli-	Mediterranean_forest	Mediterranean	Yes	Yes	Chemical	18.2167	12.6833	44.0394	584.634	33.6	4.8	28.8	15.1833	25.5833	25.8	11.55	291	43	4	43.7481	102	26	34	77
C6212Z	2021-10-14	Europe	Spain	37.69104665	-1.09636136	Crop	Lactuca_sativa_-Lettuce-	Mediterranean_forest	Mediterranean	Yes	Yes	Chemical	18.0875	12.7083	43.9735	589.492	33.6	4.7	28.9	15.0167	25.5333	25.7167	11.3667	294	43	3	45.1948	104	24	32	80
C6213D	2021-10-15	Europe	Spain	37.73869711	-0.93034593	Crop	Phaseolus_vulgaris_-Bean-	Mediterranean_forest	Mediterranean	Yes	Yes	Chemical	18.3667	12.2167	43.4757	574.651	33.2	5.1	28.1	19.55	25.55	25.8333	11.7833	291	45	4	44.8107	107	26	37	75
C6213C	2021-10-15	Europe	Spain	37.72830132	-0.94343399	Crop	Anethum_graveolens_-Dill-	Mediterranean_forest	Mediterranean	Yes	Yes	Chemical	18.3708	12.2417	43.5647	575.877	33.2	5.1	28.1	19.5667	25.5667	25.85	11.7667	291	45	4	44.8426	106	26	36	75
C6213A	2021-10-15	Europe	Spain	37.729689	-0.93672387	Crop	Brassica_oleracea_-Broccoli-	Mediterranean_forest	Mediterranean	Yes	Yes	Chemical	18.3708	12.2417	43.5646	574.664	33.2	5.1	28.1	19.5667	25.55	25.8333	11.7833	289	45	4	44.9266	106	26	36	75
C6213E	2021-10-15	Europe	Spain	37.73587725	-0.9355308	Crop	Cynara_scolymus_-Artichoke-	Mediterranean_forest	Mediterranean	Yes	Yes	Chemical	18.3583	12.2167	43.4757	575.495	33.2	5.1	28.1	19.55	25.55	25.8333	11.7667	293	45	4	44.6537	107	26	37	76
C6213F	2021-10-15	Europe	Spain	37.7275826	-0.94407791	Crop	Mentha_√ó_piperita_-Peppermint-	Mediterranean_forest	Mediterranean	Yes	Yes	Chemical	18.3708	12.2417	43.5647	575.877	33.2	5.1	28.1	19.5667	25.5667	25.85	11.7667	291	45	4	44.8426	106	26	36	75
C6213B	2021-10-15	Europe	Spain	37.72848009	-0.94334962	Crop	Petroselinum_crispum_-Parsley-	Mediterranean_forest	Mediterranean	Yes	Yes	Chemical	18.3708	12.2417	43.5647	575.877	33.2	5.1	28.1	19.5667	25.5667	25.85	11.7667	291	45	4	44.8426	106	26	36	75
C6213I	2021-10-16	Europe	Spain	37.77288697	-1.09647816	Crop	Citrus_spp._-Clementine-	Mediterranean_forest	Mediterranean	Yes	Yes	Chemical	17.7792	12.775	43.75	597.671	33.5	4.3	29.2	14.6667	25.3167	25.5333	10.9667	298	44	4	44.6828	104	26	33	78
C6213H	2021-10-16	Europe	Spain	37.78467148	-1.07907498	Crop	Apium_graveolens_-Celery-	Mediterranean_forest	Mediterranean	Yes	Yes	Chemical	17.7667	12.75	43.5154	598.609	33.5	4.2	29.3	18.8833	25.3167	25.55	10.95	301	44	4	44.7239	105	26	34	78
C6213G	2021-10-16	Europe	Spain	37.77197405	-1.06862947	Crop	Lactuca_sativa_-Lettuce-	Mediterranean_forest	Mediterranean	Yes	Yes	Chemical	17.8625	12.7083	43.6712	595.232	33.5	4.4	29.1	19	25.35	25.6	11.0667	297	44	3	45.924	105	24	33	78
C6213J	2021-10-16	Europe	Spain	37.75999787	-1.13922888	Crop	Ceratonia_siliqua_-Carob-	Mediterranean_forest	Mediterranean	No	Yes	Organic	17.7167	12.9	43.8776	601.703	33.6	4.2	29.4	14.55	25.3333	25.5167	10.8667	299	44	4	44.008	104	27	34	78
C6213L	2021-10-19	Europe	Spain	37.71492048	-0.96012843	Crop	Foeniculum_vulgare_-Fennel-	Mediterranean_forest	Mediterranean	Yes	Yes	Chemical	18.3417	12.3333	43.7352	576.88	33.2	5	28.2	19.5167	25.5667	25.8167	11.7333	288	44	4	44.1814	104	26	36	75
C6213K	2021-10-19	Europe	Spain	37.72692651	-0.94572989	Crop	Spinacia_oleracea_-Spinach-	Mediterranean_forest	Mediterranean	Yes	Yes	Chemical	18.3708	12.2417	43.5647	575.877	33.2	5.1	28.1	19.5667	25.5667	25.85	11.7667	291	45	4	44.8426	106	26	36	75
C6213P	2021-10-21	Europe	Spain	37.66803558	-0.90638277	Crop	Citrus_spp._-Citron-	Mediterranean_forest	Mediterranean	Yes	Yes	Chemical	18.5292	12.1917	43.5417	572.671	33.3	5.3	28	19.7	25.7	25.9667	11.9833	283	43	4	44.5084	104	25	36	75
C6213N	2021-10-21	Europe	Spain	37.69318115	-0.87829893	Crop	Apium_graveolens_-Celery-	Mediterranean_forest	Mediterranean	Yes	Yes	Chemical	18.5667	12.1833	43.6679	570.053	33.3	5.4	27.9	19.75	25.7	25.9833	12.0667	282	43	4	44.6273	104	25	36	75
C6213M	2021-10-21	Europe	Spain	37.69394253	-0.89967756	Crop	Beta_vulgaris_-Chard-	Mediterranean_forest	Mediterranean	Yes	Yes	Chemical	18.5458	12.2083	43.6012	570.436	33.3	5.3	28	19.7333	25.6833	25.95	12.0167	283	43	4	44.5084	104	25	36	75
C62130	2021-10-21	Europe	Spain	37.68482021	-0.88693981	Crop	Solanum_tuberosum_-Potato-	Mediterranean_forest	Mediterranean	Yes	Yes	Chemical	18.5625	12.175	43.638	570.523	33.3	5.4	27.9	19.75	25.7	25.9833	12.05	282	43	4	44.6273	104	25	36	75
C6203U	2021-10-22	Europe	Spain	43.06966	-4.46829	Natural	Fagus_sylvatica_-Beech-	Temperate_deciduous_forest	Temperate	No	No	No_data	9.15833	8.65	37.9386	516.161	22.2	-0.6	22.8	4.15	15.6833	15.8667	3.33333	852	98	41	27.1391	276	142	143	259
C62048	2021-10-22	Europe	Spain	43.04116	-4.46326	Natural	Quercus_ilex_-Spanish_Oak-	Temperate_deciduous_forest	Temperate	No	No	No_data	8.11667	8.68333	36.9504	540.279	21.9	-1.6	23.5	2.95	15.1667	15.1667	2.06667	928	108	43	28.5005	306	149	149	286
C62053	2021-10-23	Europe	Spain	43.23214	-4.21116	Natural	Fagus_sylvatica_-Beech-	Temperate_deciduous_forest	Temperate	No	No	No_data	12.6167	8.7	44.3878	409.752	22.9	3.3	19.6	10.7333	17.6167	17.9333	7.91667	890	101	48	25.1197	274	147	156	242
C6204F	2021-10-24	Europe	Spain	43.10427	-4.27258	Natural	Fagus_sylvatica_-Beech-	Temperate_deciduous_forest	Temperate	No	No	No_data	10.9417	8.91667	41.2809	469.651	22.9	1.3	21.6	8.68333	16.7833	16.9833	5.55	835	90	44	24.4307	254	145	146	235
C6214A	2021-10-26	Europe	Spain	36.733841	-3.7675	Crop	Prunus_dulcis_-Almond-	Mediterranean_forest	Mediterranean	No_data	No_data	No_data	17.5833	10.1833	42.0799	503.534	30.9	6.7	24.2	12.85	23.9	24.25	11.9833	443	73	2	64.5379	204	19	21	186
C6214V	2021-10-26	Europe	Spain	36.733652	-3.767446	Crop	Prunus_dulcis_-Almond-	Mediterranean_forest	Mediterranean	No_data	No_data	No_data	17.5833	10.1833	42.0799	503.534	30.9	6.7	24.2	12.85	23.9	24.25	11.9833	443	73	2	64.5379	204	19	21	186
C6215B	2021-10-26	Europe	Spain	36.733635	-3.767717	Crop	Prunus_dulcis_-Almond-	Mediterranean_forest	Mediterranean	No_data	No_data	No_data	17.5833	10.1833	42.0799	503.534	30.9	6.7	24.2	12.85	23.9	24.25	11.9833	443	73	2	64.5379	204	19	21	186
C62140	2021-10-26	Europe	Spain	36.758987	-4.69485	Crop	Prunus_dulcis_-Almond-	Mediterranean_forest	Mediterranean	No_data	No_data	No_data	16.975	11.1	43.0233	536.175	31.6	5.8	25.8	11.9333	23.8	24.0667	11.0333	603	107	2	71.577	296	19	25	270
C62146	2021-10-26	Europe	Spain	36.716167	-4.335689	Crop	Prunus_dulcis_-Almond-	Mediterranean_forest	Mediterranean	No_data	No_data	No_data	17.925	9.93333	42.8161	487.006	30.5	7.3	23.2	13.3667	24.0167	24.35	12.5	508	91	1	73.2626	258	18	20	228
C62147	2021-10-26	Europe	Spain	36.619682	-4.516381	Crop	Prunus_dulcis_-Almond-	Mediterranean_forest	Mediterranean	No_data	No_data	No_data	17.4083	9.23333	41.037	486.77	29.8	7.3	22.5	12.85	23.5167	23.8	11.9667	550	101	1	75.9562	284	17	20	252
C6214T	2021-10-26	Europe	Spain	36.761695	-4.696468	Crop	Prunus_dulcis_-Almond-	Mediterranean_forest	Mediterranean	No_data	No_data	No_data	16.975	11.1	43.0233	536.175	31.6	5.8	25.8	11.9333	23.8	24.0667	11.0333	603	107	2	71.577	296	19	25	270
C6214Z	2021-10-26	Europe	Spain	36.619229	-4.515823	Crop	Prunus_dulcis_-Almond-	Mediterranean_forest	Mediterranean	No_data	No_data	No_data	17.4083	9.23333	41.037	486.77	29.8	7.3	22.5	12.85	23.5167	23.8	11.9667	550	101	1	75.9562	284	17	20	252
C62156	2021-10-26	Europe	Spain	36.715945	-4.335135	Crop	Prunus_dulcis_-Almond-	Mediterranean_forest	Mediterranean	No_data	No_data	No_data	17.925	9.93333	42.8161	487.006	30.5	7.3	23.2	13.3667	24.0167	24.35	12.5	508	91	1	73.2626	258	18	20	228
C62157	2021-10-26	Europe	Spain	36.715909	-4.334992	Crop	Prunus_dulcis_-Almond-	Mediterranean_forest	Mediterranean	No_data	No_data	No_data	17.925	9.93333	42.8161	487.006	30.5	7.3	23.2	13.3667	24.0167	24.35	12.5	508	91	1	73.2626	258	18	20	228
C6215C	2021-10-26	Europe	Spain	36.618607	-4.516339	Crop	Prunus_dulcis_-Almond-	Mediterranean_forest	Mediterranean	No_data	No_data	No_data	17.4083	9.23333	41.037	486.77	29.8	7.3	22.5	12.85	23.5167	23.8	11.9667	550	101	1	75.9562	284	17	20	252
C6215G	2021-10-26	Europe	Spain	36.758552	-4.695125	Crop	Prunus_dulcis_-Almond-	Mediterranean_forest	Mediterranean	No_data	No_data	No_data	16.975	11.1	43.0233	536.175	31.6	5.8	25.8	11.9333	23.8	24.0667	11.0333	603	107	2	71.577	296	19	25	270
C6214O	2021-10-26	Europe	Spain	36.733968	-3.76724	Natural	Pasture	Mediterranean_forest	Mediterranean	No_data	No_data	No_data	17.5833	10.1833	42.0799	503.534	30.9	6.7	24.2	12.85	23.9	24.25	11.9833	443	73	2	64.5379	204	19	21	186
C6214X	2021-10-26	Europe	Spain	36.733506	-3.767567	Natural	Pasture	Mediterranean_forest	Mediterranean	No_data	No_data	No_data	17.5833	10.1833	42.0799	503.534	30.9	6.7	24.2	12.85	23.9	24.25	11.9833	443	73	2	64.5379	204	19	21	186
C62150	2021-10-26	Europe	Spain	36.73382	-3.767438	Natural	Pasture	Mediterranean_forest	Mediterranean	No_data	No_data	No_data	17.5833	10.1833	42.0799	503.534	30.9	6.7	24.2	12.85	23.9	24.25	11.9833	443	73	2	64.5379	204	19	21	186
C62142	2021-10-26	Europe	Spain	36.713296	-4.332656	Natural	Pasture	Mediterranean_forest	Mediterranean	No_data	No_data	No_data	17.925	9.93333	42.8161	487.006	30.5	7.3	23.2	13.3667	24.0167	24.35	12.5	508	91	1	73.2626	258	18	20	228
C6214E	2021-10-26	Europe	Spain	36.619229	-4.515823	Natural	Pasture	Mediterranean_forest	Mediterranean	No_data	No_data	No_data	17.4083	9.23333	41.037	486.77	29.8	7.3	22.5	12.85	23.5167	23.8	11.9667	550	101	1	75.9562	284	17	20	252
C6214I	2021-10-26	Europe	Spain	36.713501	-4.332944	Natural	Pasture	Mediterranean_forest	Mediterranean	No_data	No_data	No_data	17.925	9.93333	42.8161	487.006	30.5	7.3	23.2	13.3667	24.0167	24.35	12.5	508	91	1	73.2626	258	18	20	228
C6214J	2021-10-26	Europe	Spain	36.759847	-4.69506	Natural	Pasture	Mediterranean_forest	Mediterranean	No_data	No_data	No_data	16.975	11.1	43.0233	536.175	31.6	5.8	25.8	11.9333	23.8	24.0667	11.0333	603	107	2	71.577	296	19	25	270
C6214L	2021-10-26	Europe	Spain	36.759527	-4.695859	Natural	Pasture	Mediterranean_forest	Mediterranean	No_data	No_data	No_data	16.975	11.1	43.0233	536.175	31.6	5.8	25.8	11.9333	23.8	24.0667	11.0333	603	107	2	71.577	296	19	25	270
C6214Y	2021-10-26	Europe	Spain	36.619301	-4.516009	Natural	Pasture	Mediterranean_forest	Mediterranean	No_data	No_data	No_data	17.4083	9.23333	41.037	486.77	29.8	7.3	22.5	12.85	23.5167	23.8	11.9667	550	101	1	75.9562	284	17	20	252
C62158	2021-10-26	Europe	Spain	36.713464	-4.333189	Natural	Pasture	Mediterranean_forest	Mediterranean	No_data	No_data	No_data	17.925	9.93333	42.8161	487.006	30.5	7.3	23.2	13.3667	24.0167	24.35	12.5	508	91	1	73.2626	258	18	20	228
C6215E	2021-10-26	Europe	Spain	36.619385	-4.515866	Natural	Pasture	Mediterranean_forest	Mediterranean	No_data	No_data	No_data	17.4083	9.23333	41.037	486.77	29.8	7.3	22.5	12.85	23.5167	23.8	11.9667	550	101	1	75.9562	284	17	20	252
C6214H	2021-10-28	Europe	Spain	36.780547	-3.54894	Crop	Prunus_dulcis_-Almond-	Mediterranean_forest	Mediterranean	No_data	No_data	No_data	18.2583	10.6333	42.7042	517.181	31.9	7	24.9	13.2667	24.75	25.0333	12.4167	424	68	2	61.8816	190	20	22	170
C6214S	2021-10-28	Europe	Spain	36.783884	-3.546485	Crop	Prunus_dulcis_-Almond-	Mediterranean_forest	Mediterranean	No_data	No_data	No_data	17.7875	10.875	42.4805	530.892	32	6.4	25.6	12.6833	24.5167	24.7667	11.85	420	66	2	60.8119	185	20	22	168
C62159	2021-10-28	Europe	Spain	36.781001	-3.547125	Crop	Prunus_dulcis_-Almond-	Mediterranean_forest	Mediterranean	No_data	No_data	No_data	18.2583	10.6333	42.7042	517.181	31.9	7	24.9	13.2667	24.75	25.0333	12.4167	424	68	2	61.8816	190	20	22	170
C62143	2021-10-28	Europe	Spain	36.780791	-3.547018	Natural	Pasture	Mediterranean_forest	Mediterranean	No_data	No_data	No_data	18.2583	10.6333	42.7042	517.181	31.9	7	24.9	13.2667	24.75	25.0333	12.4167	424	68	2	61.8816	190	20	22	170
C62148	2021-10-28	Europe	Spain	36.783981	-3.546391	Natural	Pasture	Mediterranean_forest	Mediterranean	No_data	No_data	No_data	17.7875	10.875	42.4805	530.892	32	6.4	25.6	12.6833	24.5167	24.7667	11.85	420	66	2	60.8119	185	20	22	168
C6215J	2021-10-28	Europe	Spain	36.780394	-3.548782	Natural	Pasture	Mediterranean_forest	Mediterranean	No_data	No_data	No_data	18.2583	10.6333	42.7042	517.181	31.9	7	24.9	13.2667	24.75	25.0333	12.4167	424	68	2	61.8816	190	20	22	170
C6201R	2021-10-30	Europe	Spain	37.128462	-3.612848	Crop	Prunus_dulcis_-Almond-	Mediterranean_forest	Mediterranean	No_data	No_data	No_data	15.825	13.3333	41.9287	648.941	34.1	2.3	31.8	9.3	24.25	24.25	8.48333	401	56	3	53.797	159	24	24	149
C6201O	2021-10-30	Europe	Spain	37.070849	-5.663992	Crop	Beta_vulgaris_-Beet-	Mediterranean_forest	Mediterranean	Yes	Yes	Chemical	17.55	11.9667	44.4857	530.793	32.7	5.8	26.9	12.4333	24.0667	24.6167	11.5167	595	101	1	69.6276	273	16	21	251
C6214D	2021-11-01	Europe	Spain	36.748752	-2.202753	Crop	Prunus_dulcis_-Almond-	Mediterranean_forest	Mediterranean	No_data	No_data	No_data	17.7333	10.0167	40.5533	524.245	31.1	6.4	24.7	15.3	24.3167	24.6167	11.8333	219	30	1	53.8552	88	12	16	78
C62152	2021-11-01	Europe	Spain	36.749121	-2.202888	Crop	Prunus_dulcis_-Almond-	Mediterranean_forest	Mediterranean	No_data	No_data	No_data	17.7333	10.0167	40.5533	524.245	31.1	6.4	24.7	15.3	24.3167	24.6167	11.8333	219	30	1	53.8552	88	12	16	78
C6215K	2021-11-01	Europe	Spain	36.748386	-2.202947	Crop	Prunus_dulcis_-Almond-	Mediterranean_forest	Mediterranean	No_data	No_data	No_data	17.7333	10.0167	40.5533	524.245	31.1	6.4	24.7	15.3	24.3167	24.6167	11.8333	219	30	1	53.8552	88	12	16	78
C6214U	2021-11-01	Europe	Spain	36.749319	-2.20542	Natural	Pasture	Mediterranean_forest	Mediterranean	No_data	No_data	No_data	17.7333	10.0167	40.5533	524.245	31.1	6.4	24.7	15.3	24.3167	24.6167	11.8333	219	30	1	53.8552	88	12	16	78
C6215F	2021-11-01	Europe	Spain	36.749065	-2.205639	Natural	Pasture	Mediterranean_forest	Mediterranean	No_data	No_data	No_data	17.7333	10.0167	40.5533	524.245	31.1	6.4	24.7	15.3	24.3167	24.6167	11.8333	219	30	1	53.8552	88	12	16	78
C6215I	2021-11-01	Europe	Spain	36.74916	-2.205377	Natural	Pasture	Mediterranean_forest	Mediterranean	No_data	No_data	No_data	17.7333	10.0167	40.5533	524.245	31.1	6.4	24.7	15.3	24.3167	24.6167	11.8333	219	30	1	53.8552	88	12	16	78
C6214B	2021-11-03	Europe	Spain	36.753933	-2.797442	Crop	Prunus_dulcis_-Almond-	Mediterranean_forest	Mediterranean	No_data	No_data	No_data	17.9458	10.725	41.8945	534.311	31.8	6.2	25.6	12.7667	24.6667	24.9333	11.9	294	40	2	55.8738	118	15	18	108
C6214G	2021-11-03	Europe	Spain	36.753937	-2.797228	Crop	Prunus_dulcis_-Almond-	Mediterranean_forest	Mediterranean	No_data	No_data	No_data	17.9458	10.725	41.8945	534.311	31.8	6.2	25.6	12.7667	24.6667	24.9333	11.9	294	40	2	55.8738	118	15	18	108
C6215A	2021-11-03	Europe	Spain	36.754028	-2.797056	Crop	Prunus_dulcis_-Almond-	Mediterranean_forest	Mediterranean	No_data	No_data	No_data	17.9458	10.725	41.8945	534.311	31.8	6.2	25.6	12.7667	24.6667	24.9333	11.9	294	40	2	55.8738	118	15	18	108
C62141	2021-11-03	Europe	Spain	36.757341	-3.107299	Crop	Prunus_dulcis_-Almond-	Mediterranean_forest	Mediterranean	No_data	No_data	No_data	17.8167	11.0833	42.1419	544.424	32.4	6.1	26.3	12.6	24.7167	24.9833	11.7333	339	50	2	57.4878	144	18	20	132
C6214P	2021-11-03	Europe	Spain	36.757118	-3.107141	Crop	Prunus_dulcis_-Almond-	Mediterranean_forest	Mediterranean	No_data	No_data	No_data	17.8167	11.0833	42.1419	544.424	32.4	6.1	26.3	12.6	24.7167	24.9833	11.7333	339	50	2	57.4878	144	18	20	132
C6215N	2021-11-03	Europe	Spain	36.757242	-3.107218	Crop	Prunus_dulcis_-Almond-	Mediterranean_forest	Mediterranean	No_data	No_data	No_data	17.8167	11.0833	42.1419	544.424	32.4	6.1	26.3	12.6	24.7167	24.9833	11.7333	339	50	2	57.4878	144	18	20	132
C6214K	2021-11-03	Europe	Spain	36.755902	-2.802383	Natural	Pasture	Mediterranean_forest	Mediterranean	No_data	No_data	No_data	17.8708	10.7417	41.7964	536.65	31.8	6.1	25.7	12.6667	24.6333	24.9	11.8167	295	40	2	56.2367	120	15	18	110
C6214M	2021-11-03	Europe	Spain	36.755412	-2.802029	Natural	Pasture	Mediterranean_forest	Mediterranean	No_data	No_data	No_data	17.8708	10.7417	41.7964	536.65	31.8	6.1	25.7	12.6667	24.6333	24.9	11.8167	295	40	2	56.2367	120	15	18	110
C6215L	2021-11-03	Europe	Spain	36.756099	-2.802935	Natural	Pasture	Mediterranean_forest	Mediterranean	No_data	No_data	No_data	17.8708	10.7417	41.7964	536.65	31.8	6.1	25.7	12.6667	24.6333	24.9	11.8167	295	40	2	56.2367	120	15	18	110
C6214F	2021-11-03	Europe	Spain	36.756391	-3.110021	Natural	Pasture	Mediterranean_forest	Mediterranean	No_data	No_data	No_data	17.85	11.1333	42.3321	544.364	32.4	6.1	26.3	12.6333	24.75	25.0167	11.7667	344	51	2	56.7388	145	19	21	133
C62153	2021-11-03	Europe	Spain	36.757421	-3.1072	Natural	Pasture	Mediterranean_forest	Mediterranean	No_data	No_data	No_data	17.8167	11.0833	42.1419	544.424	32.4	6.1	26.3	12.6	24.7167	24.9833	11.7333	339	50	2	57.4878	144	18	20	132
C6215D	2021-11-03	Europe	Spain	36.757204	-3.107052	Natural	Pasture	Mediterranean_forest	Mediterranean	No_data	No_data	No_data	17.8167	11.0833	42.1419	544.424	32.4	6.1	26.3	12.6	24.7167	24.9833	11.7333	339	50	2	57.4878	144	18	20	132
C62145	2021-11-05	Europe	Spain	36.755904	-3.666497	Crop	Prunus_dulcis_-Almond-	Mediterranean_forest	Mediterranean	No_data	No_data	No_data	18.0792	10.675	42.5299	520.517	31.9	6.8	25.1	13.1	24.6333	24.9333	12.25	436	71	2	62.8423	198	20	22	178
C6214C	2021-11-05	Europe	Spain	36.75624	-3.666678	Crop	Prunus_dulcis_-Almond-	Mediterranean_forest	Mediterranean	No_data	No_data	No_data	17.9375	10.725	42.5595	521.349	31.9	6.7	25.2	12.9667	24.5	24.8	12.1	435	70	2	62.7932	197	20	22	178
C6214N	2021-11-05	Europe	Spain	36.759448	-3.265038	Crop	Prunus_dulcis_-Almond-	Mediterranean_forest	Mediterranean	No_data	No_data	No_data	17.2125	11.4917	42.4047	557.495	32.4	5.3	27.1	11.8833	24.3333	24.55	11.0167	377	56	2	58.1667	160	19	21	148
C6214Q	2021-11-05	Europe	Spain	36.760134	-3.264515	Crop	Prunus_dulcis_-Almond-	Mediterranean_forest	Mediterranean	No_data	No_data	No_data	17.2125	11.4917	42.4047	557.495	32.4	5.3	27.1	11.8833	24.3333	24.55	11.0167	377	56	2	58.1667	160	19	21	148
C6214W	2021-11-05	Europe	Spain	36.76038	-3.263278	Crop	Prunus_dulcis_-Almond-	Mediterranean_forest	Mediterranean	No_data	No_data	No_data	17.2125	11.4917	42.4047	557.495	32.4	5.3	27.1	11.8833	24.3333	24.55	11.0167	377	56	2	58.1667	160	19	21	148
C62155	2021-11-05	Europe	Spain	36.756484	-3.667178	Crop	Prunus_dulcis_-Almond-	Mediterranean_forest	Mediterranean	No_data	No_data	No_data	17.9375	10.725	42.5595	521.349	31.9	6.7	25.2	12.9667	24.5	24.8	12.1	435	70	2	62.7932	197	20	22	178
C62144	2021-11-05	Europe	Spain	36.759365	-3.264884	Natural	Pasture	Mediterranean_forest	Mediterranean	No_data	No_data	No_data	17.2125	11.4917	42.4047	557.495	32.4	5.3	27.1	11.8833	24.3333	24.55	11.0167	377	56	2	58.1667	160	19	21	148
C62149	2021-11-05	Europe	Spain	36.759714	-3.264133	Natural	Pasture	Mediterranean_forest	Mediterranean	No_data	No_data	No_data	17.2125	11.4917	42.4047	557.495	32.4	5.3	27.1	11.8833	24.3333	24.55	11.0167	377	56	2	58.1667	160	19	21	148
C6214R	2021-11-05	Europe	Spain	36.756614	-3.66694	Natural	Pasture	Mediterranean_forest	Mediterranean	No_data	No_data	No_data	17.9375	10.725	42.5595	521.349	31.9	6.7	25.2	12.9667	24.5	24.8	12.1	435	70	2	62.7932	197	20	22	178
C62151	2021-11-05	Europe	Spain	36.755862	-3.666396	Natural	Pasture	Mediterranean_forest	Mediterranean	No_data	No_data	No_data	18.0792	10.675	42.5299	520.517	31.9	6.8	25.1	13.1	24.6333	24.9333	12.25	436	71	2	62.8423	198	20	22	178
C62154	2021-11-05	Europe	Spain	36.756332	-3.666634	Natural	Pasture	Mediterranean_forest	Mediterranean	No_data	No_data	No_data	18.0792	10.675	42.5299	520.517	31.9	6.8	25.1	13.1	24.6333	24.9333	12.25	436	71	2	62.8423	198	20	22	178
C6215M	2021-11-05	Europe	Spain	36.759365	-3.264884	Natural	Pasture	Mediterranean_forest	Mediterranean	No_data	No_data	No_data	17.2125	11.4917	42.4047	557.495	32.4	5.3	27.1	11.8833	24.3333	24.55	11.0167	377	56	2	58.1667	160	19	21	148
C62032	2021-11-14	Europe	Spain	43.218424	-1.797309	Natural	Fagus_sylvatica_-Beech-	Temperate_deciduous_forest	Temperate	No_data	No_data	No_data	12.0792	7.24167	37.1368	445.735	22.9	3.4	19.5	10.4833	17.35	17.9333	7.08333	1328	142	74	19.7212	396	249	259	364
C62033	2021-11-14	Europe	Spain	43.218424	-1.797309	Natural	Fagus_sylvatica_-Beech-	Temperate_deciduous_forest	Temperate	No_data	No_data	No_data	12.0792	7.24167	37.1368	445.735	22.9	3.4	19.5	10.4833	17.35	17.9333	7.08333	1328	142	74	19.7212	396	249	259	364
C62034	2021-11-14	Europe	Spain	43.218424	-1.797309	Natural	Fagus_sylvatica_-Beech-	Temperate_deciduous_forest	Temperate	No_data	No_data	No_data	12.0792	7.24167	37.1368	445.735	22.9	3.4	19.5	10.4833	17.35	17.9333	7.08333	1328	142	74	19.7212	396	249	259	364
C62037	2021-11-14	Europe	Spain	43.218424	-1.797309	Natural	Quercus-robur_Oak_forest	Temperate_deciduous_forest	Temperate	No_data	No_data	No_data	12.0792	7.24167	37.1368	445.735	22.9	3.4	19.5	10.4833	17.35	17.9333	7.08333	1328	142	74	19.7212	396	249	259	364
C62039	2021-11-14	Europe	Spain	43.218424	-1.797309	Natural	Quercus-robur_Oak_forest	Temperate_deciduous_forest	Temperate	No_data	No_data	No_data	12.0792	7.24167	37.1368	445.735	22.9	3.4	19.5	10.4833	17.35	17.9333	7.08333	1328	142	74	19.7212	396	249	259	364
C6203A	2021-11-14	Europe	Spain	43.218424	-1.797309	Natural	Quercus-robur_Oak_forest	Temperate_deciduous_forest	Temperate	No_data	No_data	No_data	12.0792	7.24167	37.1368	445.735	22.9	3.4	19.5	10.4833	17.35	17.9333	7.08333	1328	142	74	19.7212	396	249	259	364
C6205T	2021-11-15	Europe	Spain	41.924358	-5.769419	Crop	Zea_mays_-Corn-	Mediterranean_forest	Mediterranean	No_data	No_data	No_data	12.0833	11.0833	40.012	595.9	27.8	0.1	27.7	5.86667	19.5833	19.7333	5.16667	645	85	18	40.1232	235	76	77	228
C62061	2021-11-15	Europe	Spain	41.9208	-5.764248	Crop	Zea_mays_-Corn-	Mediterranean_forest	Mediterranean	No_data	No_data	No_data	12.0917	11.0833	39.8681	596.424	27.9	0.1	27.8	5.86667	19.6	19.75	5.16667	644	85	18	40.1859	235	76	77	228
C62062	2021-11-15	Europe	Spain	41.920791	-5.764173	Crop	Zea_mays_-Corn-	Mediterranean_forest	Mediterranean	No_data	No_data	No_data	12.0917	11.0833	39.8681	596.424	27.9	0.1	27.8	5.86667	19.6	19.75	5.16667	644	85	18	40.1859	235	76	77	228
C62063	2021-11-15	Europe	Spain	41.920786	-5.764129	Crop	Zea_mays_-Corn-	Mediterranean_forest	Mediterranean	No_data	No_data	No_data	12.0917	11.0833	39.8681	596.424	27.9	0.1	27.8	5.86667	19.6	19.75	5.16667	644	85	18	40.1859	235	76	77	228
C62064	2021-11-15	Europe	Spain	41.920721	-5.764049	Crop	Zea_mays_-Corn-	Mediterranean_forest	Mediterranean	No_data	No_data	No_data	12.0917	11.0833	39.8681	596.424	27.9	0.1	27.8	5.86667	19.6	19.75	5.16667	644	85	18	40.1859	235	76	77	228
C62065	2021-11-15	Europe	Spain	41.92069	-5.763896	Crop	Zea_mays_-Corn-	Mediterranean_forest	Mediterranean	No_data	No_data	No_data	12.0917	11.0833	39.8681	596.424	27.9	0.1	27.8	5.86667	19.6	19.75	5.16667	644	85	18	40.1859	235	76	77	228
C62067	2021-11-15	Europe	Spain	41.920702	-5.763836	Crop	Zea_mays_-Corn-	Mediterranean_forest	Mediterranean	No_data	No_data	No_data	12.0917	11.0833	39.8681	596.424	27.9	0.1	27.8	5.86667	19.6	19.75	5.16667	644	85	18	40.1859	235	76	77	228
C6206D	2021-11-15	Europe	Spain	41.924332	-5.769394	Crop	Zea_mays_-Corn-	Mediterranean_forest	Mediterranean	No_data	No_data	No_data	12.0833	11.0833	40.012	595.9	27.8	0.1	27.7	5.86667	19.5833	19.7333	5.16667	645	85	18	40.1232	235	76	77	228
C6206F	2021-11-15	Europe	Spain	41.924292	-5.769369	Crop	Zea_mays_-Corn-	Mediterranean_forest	Mediterranean	No_data	No_data	No_data	12.0833	11.0833	40.012	595.9	27.8	0.1	27.7	5.86667	19.5833	19.7333	5.16667	645	85	18	40.1232	235	76	77	228
C6206G	2021-11-15	Europe	Spain	41.92423	-5.769381	Crop	Zea_mays_-Corn-	Mediterranean_forest	Mediterranean	No_data	No_data	No_data	12.0833	11.0833	40.012	595.9	27.8	0.1	27.7	5.86667	19.5833	19.7333	5.16667	645	85	18	40.1232	235	76	77	228
C6206H	2021-11-15	Europe	Spain	41.924216	-5.769238	Crop	Zea_mays_-Corn-	Mediterranean_forest	Mediterranean	No_data	No_data	No_data	12.0833	11.0833	40.012	595.9	27.8	0.1	27.7	5.86667	19.5833	19.7333	5.16667	645	85	18	40.1232	235	76	77	228
C6206I	2021-11-15	Europe	Spain	41.924151	-5.769179	Crop	Zea_mays_-Corn-	Mediterranean_forest	Mediterranean	No_data	No_data	No_data	12.0833	11.0833	40.012	595.9	27.8	0.1	27.7	5.86667	19.5833	19.7333	5.16667	645	85	18	40.1232	235	76	77	228
C6206J	2021-11-15	Europe	Spain	41.923992	-5.769031	Crop	Zea_mays_-Corn-	Mediterranean_forest	Mediterranean	No_data	No_data	No_data	12.0833	11.0833	40.012	595.9	27.8	0.1	27.7	5.86667	19.5833	19.7333	5.16667	645	85	18	40.1232	235	76	77	228
C6206K	2021-11-15	Europe	Spain	41.920882	-5.764384	Crop	Zea_mays_-Corn-	Mediterranean_forest	Mediterranean	No_data	No_data	No_data	12.0917	11.0833	39.8681	596.424	27.9	0.1	27.8	5.86667	19.6	19.75	5.16667	644	85	18	40.1859	235	76	77	228
C6205W	2021-11-15	Europe	Spain	41.924508	-5.769133	Natural	Alnus_glutinosa_-Alder-	Mediterranean_forest	Mediterranean	No_data	No_data	No_data	12.0833	11.0833	40.012	595.9	27.8	0.1	27.7	5.86667	19.5833	19.7333	5.16667	645	85	18	40.1232	235	76	77	228
C6205X	2021-11-15	Europe	Spain	41.924459	-5.769213	Natural	Alnus_glutinosa_-Alder-	Mediterranean_forest	Mediterranean	No_data	No_data	No_data	12.0833	11.0833	40.012	595.9	27.8	0.1	27.7	5.86667	19.5833	19.7333	5.16667	645	85	18	40.1232	235	76	77	228
C6205Y	2021-11-15	Europe	Spain	41.924334	-5.768814	Natural	Alnus_glutinosa_-Alder-	Mediterranean_forest	Mediterranean	No_data	No_data	No_data	12.0833	11.0833	40.012	595.9	27.8	0.1	27.7	5.86667	19.5833	19.7333	5.16667	645	85	18	40.1232	235	76	77	228
C6205Z	2021-11-15	Europe	Spain	41.924294	-5.768909	Natural	Alnus_glutinosa_-Alder-	Mediterranean_forest	Mediterranean	No_data	No_data	No_data	12.0833	11.0833	40.012	595.9	27.8	0.1	27.7	5.86667	19.5833	19.7333	5.16667	645	85	18	40.1232	235	76	77	228
C62068	2021-11-15	Europe	Spain	41.921047	-5.76414	Natural	Alnus_glutinosa_-Alder-	Mediterranean_forest	Mediterranean	No_data	No_data	No_data	12.0917	11.0833	39.8681	596.424	27.9	0.1	27.8	5.86667	19.6	19.75	5.16667	644	85	18	40.1859	235	76	77	228
C62069	2021-11-15	Europe	Spain	41.921055	-5.764064	Natural	Alnus_glutinosa_-Alder-	Mediterranean_forest	Mediterranean	No_data	No_data	No_data	12.0917	11.0833	39.8681	596.424	27.9	0.1	27.8	5.86667	19.6	19.75	5.16667	644	85	18	40.1859	235	76	77	228
C6206A	2021-11-15	Europe	Spain	41.924261	-5.768918	Natural	Alnus_glutinosa_-Alder-	Mediterranean_forest	Mediterranean	No_data	No_data	No_data	12.0833	11.0833	40.012	595.9	27.8	0.1	27.7	5.86667	19.5833	19.7333	5.16667	645	85	18	40.1232	235	76	77	228
C6206B	2021-11-15	Europe	Spain	41.924251	-5.76889	Natural	Alnus_glutinosa_-Alder-	Mediterranean_forest	Mediterranean	No_data	No_data	No_data	12.0833	11.0833	40.012	595.9	27.8	0.1	27.7	5.86667	19.5833	19.7333	5.16667	645	85	18	40.1232	235	76	77	228
C6206C	2021-11-15	Europe	Spain	41.924159	-5.768798	Natural	Alnus_glutinosa_-Alder-	Mediterranean_forest	Mediterranean	No_data	No_data	No_data	12.0833	11.0833	40.012	595.9	27.8	0.1	27.7	5.86667	19.5833	19.7333	5.16667	645	85	18	40.1232	235	76	77	228
C6209O	2021-11-15	Europe	Spain	41.920967	-5.763979	Natural	Alnus_glutinosa_-Alder-	Mediterranean_forest	Mediterranean	No_data	No_data	No_data	12.0917	11.0833	39.8681	596.424	27.9	0.1	27.8	5.86667	19.6	19.75	5.16667	644	85	18	40.1859	235	76	77	228
C6209P	2021-11-15	Europe	Spain	41.920979	-5.763897	Natural	Alnus_glutinosa_-Alder-	Mediterranean_forest	Mediterranean	No_data	No_data	No_data	12.0917	11.0833	39.8681	596.424	27.9	0.1	27.8	5.86667	19.6	19.75	5.16667	644	85	18	40.1859	235	76	77	228
C6209Q	2021-11-15	Europe	Spain	41.92087	-5.76379	Natural	Alnus_glutinosa_-Alder-	Mediterranean_forest	Mediterranean	No_data	No_data	No_data	12.0917	11.0833	39.8681	596.424	27.9	0.1	27.8	5.86667	19.6	19.75	5.16667	644	85	18	40.1859	235	76	77	228
C6209R	2021-11-15	Europe	Spain	41.920883	-5.763771	Natural	Alnus_glutinosa_-Alder-	Mediterranean_forest	Mediterranean	No_data	No_data	No_data	12.0917	11.0833	39.8681	596.424	27.9	0.1	27.8	5.86667	19.6	19.75	5.16667	644	85	18	40.1859	235	76	77	228
C6209S	2021-11-15	Europe	Spain	41.920858	-5.763626	Natural	Alnus_glutinosa_-Alder-	Mediterranean_forest	Mediterranean	No_data	No_data	No_data	12.0917	11.0833	39.8681	596.424	27.9	0.1	27.8	5.86667	19.6	19.75	5.16667	644	85	18	40.1859	235	76	77	228
C620A0	2021-11-15	Europe	Spain	41.926106	-5.765554	Natural	Populus_spp._-Poplar-	Mediterranean_forest	Mediterranean	No_data	No_data	No_data	12.1042	11.0917	39.8981	595.931	27.9	0.1	27.8	5.86667	19.75	19.75	5.18333	642	85	19	39.7057	234	78	78	226
C620A1	2021-11-15	Europe	Spain	41.926288	-5.765619	Natural	Populus_spp._-Poplar-	Mediterranean_forest	Mediterranean	No_data	No_data	No_data	12.1042	11.0917	39.8981	595.931	27.9	0.1	27.8	5.86667	19.75	19.75	5.18333	642	85	19	39.7057	234	78	78	226
C620A3	2021-11-15	Europe	Spain	41.926285	-5.765589	Natural	Populus_spp._-Poplar-	Mediterranean_forest	Mediterranean	No_data	No_data	No_data	12.1042	11.0917	39.8981	595.931	27.9	0.1	27.8	5.86667	19.75	19.75	5.18333	642	85	19	39.7057	234	78	78	226
C620A7	2021-11-15	Europe	Spain	41.926245	-5.765525	Natural	Populus_spp._-Poplar-	Mediterranean_forest	Mediterranean	No_data	No_data	No_data	12.1042	11.0917	39.8981	595.931	27.9	0.1	27.8	5.86667	19.75	19.75	5.18333	642	85	19	39.7057	234	78	78	226
C620AC	2021-11-15	Europe	Spain	41.926223	-5.76552	Natural	Populus_spp._-Poplar-	Mediterranean_forest	Mediterranean	No_data	No_data	No_data	12.1042	11.0917	39.8981	595.931	27.9	0.1	27.8	5.86667	19.75	19.75	5.18333	642	85	19	39.7057	234	78	78	226
C620AF	2021-11-15	Europe	Spain	41.926201	-5.76552	Natural	Populus_spp._-Poplar-	Mediterranean_forest	Mediterranean	No_data	No_data	No_data	12.1042	11.0917	39.8981	595.931	27.9	0.1	27.8	5.86667	19.75	19.75	5.18333	642	85	19	39.7057	234	78	78	226
C620AI	2021-11-15	Europe	Spain	41.926188	-5.765493	Natural	Populus_spp._-Poplar-	Mediterranean_forest	Mediterranean	No_data	No_data	No_data	12.1042	11.0917	39.8981	595.931	27.9	0.1	27.8	5.86667	19.75	19.75	5.18333	642	85	19	39.7057	234	78	78	226
C620AJ	2021-11-15	Europe	Spain	41.926158	-5.765473	Natural	Populus_spp._-Poplar-	Mediterranean_forest	Mediterranean	No_data	No_data	No_data	12.1042	11.0917	39.8981	595.931	27.9	0.1	27.8	5.86667	19.75	19.75	5.18333	642	85	19	39.7057	234	78	78	226
C6209T	2021-11-15	Europe	Spain	41.926215	-5.765749	Natural	Populus_spp._-Poplar-	Mediterranean_forest	Mediterranean	No_data	No_data	No_data	12.1042	11.0917	39.8981	595.931	27.9	0.1	27.8	5.86667	19.75	19.75	5.18333	642	85	19	39.7057	234	78	78	226
C6209U	2021-11-15	Europe	Spain	41.926175	-5.765706	Natural	Populus_spp._-Poplar-	Mediterranean_forest	Mediterranean	No_data	No_data	No_data	12.1042	11.0917	39.8981	595.931	27.9	0.1	27.8	5.86667	19.75	19.75	5.18333	642	85	19	39.7057	234	78	78	226
C6209W	2021-11-15	Europe	Spain	41.926146	-5.76566	Natural	Populus_spp._-Poplar-	Mediterranean_forest	Mediterranean	No_data	No_data	No_data	12.1042	11.0917	39.8981	595.931	27.9	0.1	27.8	5.86667	19.75	19.75	5.18333	642	85	19	39.7057	234	78	78	226
C6209X	2021-11-15	Europe	Spain	41.92617	-5.765647	Natural	Populus_spp._-Poplar-	Mediterranean_forest	Mediterranean	No_data	No_data	No_data	12.1042	11.0917	39.8981	595.931	27.9	0.1	27.8	5.86667	19.75	19.75	5.18333	642	85	19	39.7057	234	78	78	226
C6209Y	2021-11-15	Europe	Spain	41.926146	-5.765593	Natural	Populus_spp._-Poplar-	Mediterranean_forest	Mediterranean	No_data	No_data	No_data	12.1042	11.0917	39.8981	595.931	27.9	0.1	27.8	5.86667	19.75	19.75	5.18333	642	85	19	39.7057	234	78	78	226
C6209Z	2021-11-15	Europe	Spain	41.92612	-5.765553	Natural	Populus_spp._-Poplar-	Mediterranean_forest	Mediterranean	No_data	No_data	No_data	12.1042	11.0917	39.8981	595.931	27.9	0.1	27.8	5.86667	19.75	19.75	5.18333	642	85	19	39.7057	234	78	78	226
C6203C	2021-11-15	Europe	Spain	40.35277	-6.78157	Natural	Quercus_pyrenaica_-Oak-	Mediterranean_forest	Mediterranean	No	No	No_data	11.7125	9.00833	36.9194	557.483	25.8	1.4	24.4	6.38333	19.1	19.1	5.5	918	136	11	54.687	379	65	65	364
C620BA	2021-11-15	Europe	Spain	36.79365	-2.71949	Crop	Solanum_lycopersicum_-Tomato-	Mediterranean_forest	Mediterranean	No_data	No_data	No_data	17.4458	10.8417	41.6987	545.996	31.7	5.7	26	12.2	24.3667	24.6167	11.3167	307	42	2	54.8062	121	16	19	110
C620BB	2021-11-15	Europe	Spain	36.79365	-2.71949	Crop	Solanum_lycopersicum_-Tomato-	Mediterranean_forest	Mediterranean	No_data	No_data	No_data	17.4458	10.8417	41.6987	545.996	31.7	5.7	26	12.2	24.3667	24.6167	11.3167	307	42	2	54.8062	121	16	19	110
C620BC	2021-11-15	Europe	Spain	36.79365	-2.71949	Crop	Solanum_lycopersicum_-Tomato-	Mediterranean_forest	Mediterranean	No_data	No_data	No_data	17.4458	10.8417	41.6987	545.996	31.7	5.7	26	12.2	24.3667	24.6167	11.3167	307	42	2	54.8062	121	16	19	110
C620BD	2021-11-15	Europe	Spain	36.79365	-2.71949	Crop	Solanum_lycopersicum_-Tomato-	Mediterranean_forest	Mediterranean	No_data	No_data	No_data	17.4458	10.8417	41.6987	545.996	31.7	5.7	26	12.2	24.3667	24.6167	11.3167	307	42	2	54.8062	121	16	19	110
C620BE	2021-11-15	Europe	Spain	36.79365	-2.71949	Crop	Solanum_lycopersicum_-Tomato-	Mediterranean_forest	Mediterranean	No_data	No_data	No_data	17.4458	10.8417	41.6987	545.996	31.7	5.7	26	12.2	24.3667	24.6167	11.3167	307	42	2	54.8062	121	16	19	110
C620BF	2021-11-15	Europe	Spain	36.79365	-2.71949	Crop	Solanum_lycopersicum_-Tomato-	Mediterranean_forest	Mediterranean	No_data	No_data	No_data	17.4458	10.8417	41.6987	545.996	31.7	5.7	26	12.2	24.3667	24.6167	11.3167	307	42	2	54.8062	121	16	19	110
C620BG	2021-11-15	Europe	Spain	36.79365	-2.71949	Crop	Solanum_lycopersicum_-Tomato-	Mediterranean_forest	Mediterranean	No_data	No_data	No_data	17.4458	10.8417	41.6987	545.996	31.7	5.7	26	12.2	24.3667	24.6167	11.3167	307	42	2	54.8062	121	16	19	110
C620BH	2021-11-15	Europe	Spain	36.79365	-2.71949	Crop	Solanum_lycopersicum_-Tomato-	Mediterranean_forest	Mediterranean	No_data	No_data	No_data	17.4458	10.8417	41.6987	545.996	31.7	5.7	26	12.2	24.3667	24.6167	11.3167	307	42	2	54.8062	121	16	19	110
C620BI	2021-11-15	Europe	Spain	36.79365	-2.71949	Crop	Solanum_lycopersicum_-Tomato-	Mediterranean_forest	Mediterranean	No_data	No_data	No_data	17.4458	10.8417	41.6987	545.996	31.7	5.7	26	12.2	24.3667	24.6167	11.3167	307	42	2	54.8062	121	16	19	110
C620BJ	2021-11-15	Europe	Spain	36.79365	-2.71949	Crop	Solanum_lycopersicum_-Tomato-	Mediterranean_forest	Mediterranean	No_data	No_data	No_data	17.4458	10.8417	41.6987	545.996	31.7	5.7	26	12.2	24.3667	24.6167	11.3167	307	42	2	54.8062	121	16	19	110
C620BK	2021-11-15	Europe	Spain	36.79365	-2.71949	Crop	Solanum_lycopersicum_-Tomato-	Mediterranean_forest	Mediterranean	No_data	No_data	No_data	17.4458	10.8417	41.6987	545.996	31.7	5.7	26	12.2	24.3667	24.6167	11.3167	307	42	2	54.8062	121	16	19	110
C620BL	2021-11-15	Europe	Spain	36.79365	-2.71949	Crop	Solanum_lycopersicum_-Tomato-	Mediterranean_forest	Mediterranean	No_data	No_data	No_data	17.4458	10.8417	41.6987	545.996	31.7	5.7	26	12.2	24.3667	24.6167	11.3167	307	42	2	54.8062	121	16	19	110
C620BM	2021-11-15	Europe	Spain	36.79365	-2.71949	Crop	Solanum_lycopersicum_-Tomato-	Mediterranean_forest	Mediterranean	No_data	No_data	No_data	17.4458	10.8417	41.6987	545.996	31.7	5.7	26	12.2	24.3667	24.6167	11.3167	307	42	2	54.8062	121	16	19	110
C620BN	2021-11-15	Europe	Spain	36.79365	-2.71949	Crop	Solanum_lycopersicum_-Tomato-	Mediterranean_forest	Mediterranean	No_data	No_data	No_data	17.4458	10.8417	41.6987	545.996	31.7	5.7	26	12.2	24.3667	24.6167	11.3167	307	42	2	54.8062	121	16	19	110
C620BO	2021-11-15	Europe	Spain	36.79365	-2.71949	Crop	Solanum_lycopersicum_-Tomato-	Mediterranean_forest	Mediterranean	No_data	No_data	No_data	17.4458	10.8417	41.6987	545.996	31.7	5.7	26	12.2	24.3667	24.6167	11.3167	307	42	2	54.8062	121	16	19	110
C620BP	2021-11-15	Europe	Spain	36.79365	-2.71949	Crop	Solanum_lycopersicum_-Tomato-	Mediterranean_forest	Mediterranean	No_data	No_data	No_data	17.4458	10.8417	41.6987	545.996	31.7	5.7	26	12.2	24.3667	24.6167	11.3167	307	42	2	54.8062	121	16	19	110
C620BQ	2021-11-15	Europe	Spain	36.79365	-2.71949	Crop	Solanum_lycopersicum_-Tomato-	Mediterranean_forest	Mediterranean	No_data	No_data	No_data	17.4458	10.8417	41.6987	545.996	31.7	5.7	26	12.2	24.3667	24.6167	11.3167	307	42	2	54.8062	121	16	19	110
C620BR	2021-11-15	Europe	Spain	36.79365	-2.71949	Crop	Solanum_lycopersicum_-Tomato-	Mediterranean_forest	Mediterranean	No_data	No_data	No_data	17.4458	10.8417	41.6987	545.996	31.7	5.7	26	12.2	24.3667	24.6167	11.3167	307	42	2	54.8062	121	16	19	110
C6203R	2021-11-16	Europe	Spain	40.999003	-5.343663	Natural	Quercus_ilex_-Spanish_Oak-	Mediterranean_forest	Mediterranean	No	No	No_data	11.7	11.8167	40.3299	625.002	28.9	-0.4	29.3	8.03333	19.6333	19.7167	4.51667	418	48	13	33.5482	138	59	64	124
C6203S	2021-11-16	Europe	Spain	40.998413	-5.34081	Natural	Quercus_ilex_-Spanish_Oak-	Mediterranean_forest	Mediterranean	No	No	No_data	11.7083	11.8333	40.113	627.139	29.1	-0.4	29.5	8.03333	19.6833	19.7667	4.51667	417	48	13	33.463	138	59	64	123
C6203X	2021-11-16	Europe	Spain	40.999003	-5.343663	Natural	Quercus_ilex_-Spanish_Oak-	Mediterranean_forest	Mediterranean	No	No	No_data	11.7	11.8167	40.3299	625.002	28.9	-0.4	29.3	8.03333	19.6333	19.7167	4.51667	418	48	13	33.5482	138	59	64	124
C62035	2021-11-16	Europe	Spain	40.52988	-6.04911	Natural	Quercus_robur_-Oak-	Mediterranean_forest	Mediterranean	No	No	No_data	11.4875	9.25833	37.0333	571.545	25.9	0.9	25	6	19.0667	19.0667	5.18333	922	135	15	51.8738	369	71	71	367
C6203W	2021-11-16	Europe	Spain	40.55568	-6.07138	Natural	Pasture	Mediterranean_forest	Mediterranean	No	No	No_data	10.8542	9.35833	37.2842	572.322	25.4	0.3	25.1	5.4	18.45	18.45	4.55	998	147	16	52.3308	401	75	75	398
C62038	2021-11-17	Europe	Spain	40.93225	-5.74067	Natural	Quercus_ilex_-Spanish_Oak-	Mediterranean_forest	Mediterranean	No	No	No_data	11.7083	11.3833	38.984	630.641	29.1	-0.1	29.2	5.33333	19.8833	19.8833	4.63333	635	84	15	42.1715	234	68	68	228
C6203T	2021-11-17	Europe	Spain	40.93063	-5.74002	Natural	Quercus_ilex_-Spanish_Oak-	Mediterranean_forest	Mediterranean	No	No	No_data	11.7083	11.3833	38.984	630.641	29.1	-0.1	29.2	5.33333	19.8833	19.8833	4.63333	635	84	15	42.1715	234	68	68	228
C6216K	2021-11-17	Europe	Spain	37.404904	-3.486032	Crop	Olea_europea_-Olive-	Mediterranean_forest	Mediterranean	Yes	Yes	Organic	14.6708	14.0417	41.7907	683.698	34.3	0.7	33.6	7.81667	23.6	23.6	7	432	59	4	51.7571	166	28	28	157
C6216M	2021-11-17	Europe	Spain	37.327722	-3.645568	Crop	Olea_europea_-Olive-	Mediterranean_forest	Mediterranean	Yes	Yes	Chemical	15.5917	13.9667	42.4519	665.804	34.8	1.9	32.9	8.95	24.2667	24.2667	8.15	419	57	3	52.4045	162	26	26	152
C6216N	2021-11-17	Europe	Spain	37.411	-3.736421	Crop	Olea_europea_-Olive-	Mediterranean_forest	Mediterranean	Yes	Yes	Chemical	14.7792	13.7917	41.92	669.822	34	1.1	32.9	8.11667	23.5167	23.5167	7.28333	454	63	4	52.9204	177	28	28	167
C6216O	2021-11-17	Europe	Spain	37.327379	-3.643906	Crop	Olea_europea_-Olive-	Mediterranean_forest	Mediterranean	No	No	No_data	15.5917	13.9667	42.4519	665.804	34.8	1.9	32.9	8.95	24.2667	24.2667	8.15	419	57	3	52.4045	162	26	26	152
C6216Q	2021-11-17	Europe	Spain	37.319189	-3.648317	Crop	Olea_europea_-Olive-	Mediterranean_forest	Mediterranean	No	No	No_data	15.8208	13.9583	42.5559	662.559	34.9	2.1	32.8	9.16667	24.4333	24.4333	8.38333	407	56	3	52.6881	158	25	25	148
C6216S	2021-11-17	Europe	Spain	37.414013	-3.737468	Crop	Olea_europea_-Olive-	Mediterranean_forest	Mediterranean	No	No	No_data	14.7792	13.7917	41.92	669.822	34	1.1	32.9	8.11667	23.5167	23.5167	7.28333	454	63	4	52.9204	177	28	28	167
C6216T	2021-11-17	Europe	Spain	37.412863	-3.73844	Crop	Olea_europea_-Olive-	Mediterranean_forest	Mediterranean	Yes	Yes	Chemical	14.7792	13.7917	41.92	669.822	34	1.1	32.9	8.11667	23.5167	23.5167	7.28333	454	63	4	52.9204	177	28	28	167
C6216U	2021-11-17	Europe	Spain	37.414119	-3.737876	Crop	Olea_europea_-Olive-	Mediterranean_forest	Mediterranean	No	No	No_data	14.7792	13.7917	41.92	669.822	34	1.1	32.9	8.11667	23.5167	23.5167	7.28333	454	63	4	52.9204	177	28	28	167
C6216X	2021-11-17	Europe	Spain	37.411723	-3.739073	Crop	Olea_europea_-Olive-	Mediterranean_forest	Mediterranean	Yes	Yes	Chemical	14.7792	13.7917	41.92	669.822	34	1.1	32.9	8.11667	23.5167	23.5167	7.28333	454	63	4	52.9204	177	28	28	167
C6216Y	2021-11-17	Europe	Spain	37.326734	-3.643257	Crop	Olea_europea_-Olive-	Mediterranean_forest	Mediterranean	No	No	No_data	15.5917	13.9667	42.4519	665.804	34.8	1.9	32.9	8.95	24.2667	24.2667	8.15	419	57	3	52.4045	162	26	26	152
C6216Z	2021-11-17	Europe	Spain	37.411214	-3.73535	Crop	Olea_europea_-Olive-	Mediterranean_forest	Mediterranean	No	No	No_data	14.7792	13.7917	41.92	669.822	34	1.1	32.9	8.11667	23.5167	23.5167	7.28333	454	63	4	52.9204	177	28	28	167
C62170	2021-11-17	Europe	Spain	37.326575	-3.644317	Crop	Olea_europea_-Olive-	Mediterranean_forest	Mediterranean	Yes	Yes	Chemical	15.5917	13.9667	42.4519	665.804	34.8	1.9	32.9	8.95	24.2667	24.2667	8.15	419	57	3	52.4045	162	26	26	152
C62172	2021-11-17	Europe	Spain	37.319573	-3.648896	Crop	Olea_europea_-Olive-	Mediterranean_forest	Mediterranean	Yes	Yes	Chemical	15.8208	13.9583	42.5559	662.559	34.9	2.1	32.8	9.16667	24.4333	24.4333	8.38333	407	56	3	52.6881	158	25	25	148
C62174	2021-11-17	Europe	Spain	37.412831	-3.739163	Crop	Olea_europea_-Olive-	Mediterranean_forest	Mediterranean	No	No	No_data	14.7792	13.7917	41.92	669.822	34	1.1	32.9	8.11667	23.5167	23.5167	7.28333	454	63	4	52.9204	177	28	28	167
C62175	2021-11-17	Europe	Spain	37.410686	-3.736204	Crop	Olea_europea_-Olive-	Mediterranean_forest	Mediterranean	Yes	Yes	Chemical	14.7792	13.7917	41.92	669.822	34	1.1	32.9	8.11667	23.5167	23.5167	7.28333	454	63	4	52.9204	177	28	28	167
C62176	2021-11-17	Europe	Spain	37.405699	-3.485393	Crop	Olea_europea_-Olive-	Mediterranean_forest	Mediterranean	Yes	Yes	Organic	14.6708	14.0417	41.7907	683.698	34.3	0.7	33.6	7.81667	23.6	23.6	7	432	59	4	51.7571	166	28	28	157
C62177	2021-11-17	Europe	Spain	37.322858	-3.646576	Crop	Olea_europea_-Olive-	Mediterranean_forest	Mediterranean	Yes	Yes	Chemical	15.8208	13.9583	42.5559	662.559	34.9	2.1	32.8	9.16667	24.4333	24.4333	8.38333	407	56	3	52.6881	158	25	25	148
C6217A	2021-11-17	Europe	Spain	37.31506	-3.686709	Crop	Olea_europea_-Olive-	Mediterranean_forest	Mediterranean	Yes	Yes	Chemical	15.8	13.9833	42.5025	663.123	34.9	2	32.9	9.15	24.4333	24.4333	8.35	411	57	3	53.0473	161	25	25	151
C6217B	2021-11-17	Europe	Spain	37.411717	-3.734202	Crop	Olea_europea_-Olive-	Mediterranean_forest	Mediterranean	Yes	Yes	Chemical	14.7792	13.7917	41.92	669.822	34	1.1	32.9	8.11667	23.5167	23.5167	7.28333	454	63	4	52.9204	177	28	28	167
C6217C	2021-11-17	Europe	Spain	37.411046	-3.73493	Crop	Olea_europea_-Olive-	Mediterranean_forest	Mediterranean	No	No	No_data	14.7792	13.7917	41.92	669.822	34	1.1	32.9	8.11667	23.5167	23.5167	7.28333	454	63	4	52.9204	177	28	28	167
C6217D	2021-11-17	Europe	Spain	37.321903	-3.646546	Crop	Olea_europea_-Olive-	Mediterranean_forest	Mediterranean	No	No	No_data	15.8208	13.9583	42.5559	662.559	34.9	2.1	32.8	9.16667	24.4333	24.4333	8.38333	407	56	3	52.6881	158	25	25	148
C6217F	2021-11-17	Europe	Spain	37.414356	-3.737358	Crop	Olea_europea_-Olive-	Mediterranean_forest	Mediterranean	No	No	No_data	14.7792	13.7917	41.92	669.822	34	1.1	32.9	8.11667	23.5167	23.5167	7.28333	454	63	4	52.9204	177	28	28	167
C6217G	2021-11-17	Europe	Spain	37.413047	-3.737831	Crop	Olea_europea_-Olive-	Mediterranean_forest	Mediterranean	Yes	Yes	Chemical	14.7792	13.7917	41.92	669.822	34	1.1	32.9	8.11667	23.5167	23.5167	7.28333	454	63	4	52.9204	177	28	28	167
C6217H	2021-11-17	Europe	Spain	37.315051	-3.686731	Crop	Olea_europea_-Olive-	Mediterranean_forest	Mediterranean	No	Yes	Organic	15.8	13.9833	42.5025	663.123	34.9	2	32.9	9.15	24.4333	24.4333	8.35	411	57	3	53.0473	161	25	25	151
C6217I	2021-11-17	Europe	Spain	37.412407	-3.739204	Crop	Olea_europea_-Olive-	Mediterranean_forest	Mediterranean	No	No	No_data	14.7792	13.7917	41.92	669.822	34	1.1	32.9	8.11667	23.5167	23.5167	7.28333	454	63	4	52.9204	177	28	28	167
C6217L	2021-11-17	Europe	Spain	37.410936	-3.735167	Crop	Olea_europea_-Olive-	Mediterranean_forest	Mediterranean	No	Yes	Organic	14.7792	13.7917	41.92	669.822	34	1.1	32.9	8.11667	23.5167	23.5167	7.28333	454	63	4	52.9204	177	28	28	167
C6203Q	2021-11-20	Europe	Spain	40.56763	-6.13919	Natural	Quercus_pyrenaica_-Oak-	Mediterranean_forest	Mediterranean	No	No	No_data	11.0708	9.50833	37.5823	567.841	25.7	0.4	25.3	5.61667	18.5667	18.5667	4.73333	994	148	16	53.007	404	76	76	403
C6202B	2021-11-23	Europe	Spain	38.207965	-4.818789	Natural	Mediterranean_forest	Mediterranean_forest	Mediterranean	No	No	No_data	15.7958	12.9583	40.6217	665.867	34.3	2.4	31.9	9.01667	24.3833	24.3833	8.21667	548	86	4	58.992	234	30	30	210
C6202D	2021-11-23	Europe	Spain	38.207179	-4.835088	Natural	Riparian_forest	Mediterranean_forest	Mediterranean	No	No	No_data	15.3583	12.8833	40.2604	670.362	34	2	32	8.56667	24.0167	24.0333	7.76667	569	89	5	57.9416	241	33	34	219
C6202A	2021-11-23	Europe	Spain	38.208094	-4.818508	Crop	Olea_europea_-Olive-	Mediterranean_forest	Mediterranean	No	Yes	Organic	15.7958	12.9583	40.6217	665.867	34.3	2.4	31.9	9.01667	24.3833	24.3833	8.21667	548	86	4	58.992	234	30	30	210
C6202C	2021-11-23	Europe	Spain	38.206771	-4.835233	Crop	Olea_europea_-Olive-	Mediterranean_forest	Mediterranean	No	Yes	Organic	15.3583	12.8833	40.2604	670.362	34	2	32	8.56667	24.0167	24.0333	7.76667	569	89	5	57.9416	241	33	34	219
C6202O	2021-11-25	Europe	Spain	38.161775	-4.754376	Crop	Olea_europea_-Olive-	Mediterranean_forest	Mediterranean	No	Yes	Organic	15.5083	12.95	40.2174	676.168	34.3	2.1	32.2	8.66667	24.2667	24.2667	7.88333	570	88	5	57.3592	239	33	33	218
C6203E	2021-11-30	Europe	Spain	40.49909	-5.99835	Natural	Arbutus_unedo	Mediterranean_forest	Mediterranean	No	No	No_data	13.1542	10.2083	39.1124	571.813	28	1.9	26.1	7.4	20.5833	20.5833	6.66667	730	104	12	50.6366	291	60	60	289
C6202G	2021-11-30	Europe	Spain	38.1394	-4.78114	Natural	Quercus_ilex_-Spanish_Oak-	Temperate_deciduous_forest	Temperate	No	Yes	Organic	15.6708	12.975	40.295	671.547	34.4	2.2	32.2	8.86667	24.3667	24.3833	8.1	567	88	4	58.3139	240	32	33	217
C62031	2021-11-30	Europe	Spain	40.53066	-6.05009	Natural	Quercus_robur_-Oak-	Mediterranean_forest	Mediterranean	No	No	No_data	11.5292	9.34167	37.2178	571.352	26	0.9	25.1	6.03333	19.1	19.1	5.21667	919	134	15	51.6788	367	72	72	366
C6202H	2021-11-30	Europe	Spain	38.14031	-4.78005	Crop	Olea_europea_-Olive-	Mediterranean_forest	Mediterranean	No	No	No_data	15.6708	12.975	40.295	671.547	34.4	2.2	32.2	8.86667	24.3667	24.3833	8.1	567	88	4	58.3139	240	32	33	217
C62191	2021-12-01	Europe	Spain	39.58672222	-0.3965	Crop	Citrus_spp._-Citron-	Mediterranean_forest	Mediterranean	No_data	No_data	No_data	17.1708	9.79167	40.7986	530.143	29.8	5.8	24	14.6	23.8333	24.15	11.2333	425	72	9	45.7018	167	50	76	112
C62197	2021-12-01	Europe	Spain	39.58672222	-0.3965	Crop	Citrus_spp._-Citron-	Mediterranean_forest	Mediterranean	No_data	No_data	No_data	17.1708	9.79167	40.7986	530.143	29.8	5.8	24	14.6	23.8333	24.15	11.2333	425	72	9	45.7018	167	50	76	112
C6219E	2021-12-01	Europe	Spain	39.58672222	-0.3965	Crop	Citrus_spp._-Citron-	Mediterranean_forest	Mediterranean	No_data	No_data	No_data	17.1708	9.79167	40.7986	530.143	29.8	5.8	24	14.6	23.8333	24.15	11.2333	425	72	9	45.7018	167	50	76	112
C6218M	2021-12-01	Europe	Spain	39.58813889	-0.39816667	Crop	Citrus_spp._-Orange-	Mediterranean_forest	Mediterranean	No_data	No_data	No_data	17.1708	9.79167	40.7986	530.143	29.8	5.8	24	14.6	23.8333	24.15	11.2333	425	72	9	45.7018	167	50	76	112
C6218X	2021-12-01	Europe	Spain	39.58813889	-0.39816667	Crop	Citrus_spp._-Orange-	Mediterranean_forest	Mediterranean	No_data	No_data	No_data	17.1708	9.79167	40.7986	530.143	29.8	5.8	24	14.6	23.8333	24.15	11.2333	425	72	9	45.7018	167	50	76	112
C6218Z	2021-12-01	Europe	Spain	39.58813889	-0.39816667	Crop	Citrus_spp._-Orange-	Mediterranean_forest	Mediterranean	No_data	No_data	No_data	17.1708	9.79167	40.7986	530.143	29.8	5.8	24	14.6	23.8333	24.15	11.2333	425	72	9	45.7018	167	50	76	112
C6202P	2021-12-01	Europe	Spain	38.009635	-4.49248	Crop	Olea_europea_-Olive-	Mediterranean_forest	Mediterranean	No	Yes	Chemical	17.5083	13.1333	41.1703	665.097	35.7	3.8	31.9	10.6	26	26.0333	9.86667	498	80	4	59.8246	216	27	31	192
C6202Q	2021-12-01	Europe	Spain	38.011258	-4.493646	Crop	Olea_europea_-Olive-	Mediterranean_forest	Mediterranean	No	Yes	Chemical	17.5083	13.1333	41.1703	665.097	35.7	3.8	31.9	10.6	26	26.0333	9.86667	498	80	4	59.8246	216	27	31	192
C621HC	2021-12-01	Europe	Spain	37.31418999	-6.70835986	Crop	Pistaccia_vera_-Pistachio-	Mediterranean_forest	Mediterranean	No_data	No_data	No_data	17.8042	11.525	42.3713	555.016	33	5.8	27.2	12.2333	24.7333	24.9667	11.3833	507	85	2	66.7806	238	21	25	210
C621HI	2021-12-01	Europe	Spain	37.30314093	-6.68768406	Crop	Pistaccia_vera_-Pistachio-	Mediterranean_forest	Mediterranean	No_data	No_data	No_data	17.7458	11.3917	42.1914	552.776	32.8	5.8	27	12.2	24.6667	24.8667	11.3333	507	85	2	67.1941	239	21	24	211
C621HX	2021-12-01	Europe	Spain	37.31293263	-6.70056523	Crop	Pistaccia_vera_-Pistachio-	Mediterranean_forest	Mediterranean	No_data	No_data	No_data	17.8333	11.5	42.4354	554.081	33	5.9	27.1	12.2833	24.7667	24.9667	11.4	505	85	2	67.0925	238	21	24	210
C621GS	2021-12-01	Europe	Spain	37.34266078	-6.38997304	Crop	Pistaccia_vera_-Pistachio-	Mediterranean_forest	Mediterranean	No_data	No_data	No_data	17.775	11.8667	41.784	579.229	33.9	5.5	28.4	11.95	25.0833	25.2667	11.0833	529	90	2	66.5264	248	23	26	220
C621HD	2021-12-01	Europe	Spain	37.34241057	-6.38944242	Crop	Pistaccia_vera_-Pistachio-	Mediterranean_forest	Mediterranean	No_data	No_data	No_data	17.775	11.8667	41.784	579.229	33.9	5.5	28.4	11.95	25.0833	25.2667	11.0833	529	90	2	66.5264	248	23	26	220
C621GL	2021-12-01	Europe	Spain	37.29817817	-6.533022	Crop	Pistaccia_vera_-Pistachio-	Mediterranean_forest	Mediterranean	No_data	No_data	No_data	17.8708	11.8917	42.9302	559.442	33.4	5.7	27.7	12.2167	24.8833	25.0833	11.3833	520	88	2	66.7701	244	22	25	216
C621GM	2021-12-01	Europe	Spain	37.3339572	-6.41387768	Crop	Pistaccia_vera_-Pistachio-	Mediterranean_forest	Mediterranean	No_data	No_data	No_data	17.6167	11.6667	41.5184	574.794	33.5	5.4	28.1	11.8333	24.8667	25.0333	10.9667	536	91	2	65.8613	250	24	27	223
C621GN	2021-12-01	Europe	Spain	37.30175601	-6.55165518	Crop	Pistaccia_vera_-Pistachio-	Mediterranean_forest	Mediterranean	No_data	No_data	No_data	17.8	11.9167	43.0205	558	33.3	5.6	27.7	12.1833	24.8	25	11.3333	526	88	2	66.0973	245	22	26	218
C621GP	2021-12-01	Europe	Spain	37.34254169	-6.58949096	Crop	Pistaccia_vera_-Pistachio-	Mediterranean_forest	Mediterranean	No_data	No_data	No_data	17.6917	11.8	42.5993	561.122	33.2	5.5	27.7	12.05	24.7333	24.9333	11.2	527	88	3	65.6915	245	23	27	218
C621GQ	2021-12-01	Europe	Spain	37.31049812	-6.50996621	Crop	Pistaccia_vera_-Pistachio-	Mediterranean_forest	Mediterranean	No_data	No_data	No_data	17.7875	11.8417	42.5959	561.804	33.4	5.6	27.8	12.1333	24.8333	25.0333	11.2667	526	88	2	66.3773	246	22	26	218
C621GT	2021-12-01	Europe	Spain	37.32071964	-6.52701585	Crop	Pistaccia_vera_-Pistachio-	Mediterranean_forest	Mediterranean	No_data	No_data	No_data	17.8208	11.8583	42.6559	562.533	33.4	5.6	27.8	12.15	24.8833	25.0667	11.3	521	88	2	66.7078	244	22	25	217
C621GV	2021-12-01	Europe	Spain	37.37330564	-6.39638511	Crop	Pistaccia_vera_-Pistachio-	Mediterranean_forest	Mediterranean	No_data	No_data	No_data	17.6792	11.9917	41.9289	582.43	33.9	5.3	28.6	11.8333	25.0167	25.25	10.9667	540	91	3	65.3884	251	25	29	224
C621GW	2021-12-01	Europe	Spain	37.29725539	-6.53061412	Crop	Pistaccia_vera_-Pistachio-	Mediterranean_forest	Mediterranean	No_data	No_data	No_data	17.8708	11.8917	42.9302	559.442	33.4	5.7	27.7	12.2167	24.8833	25.0833	11.3833	520	88	2	66.7701	244	22	25	216
C621H1	2021-12-01	Europe	Spain	37.37304772	-6.39677001	Crop	Pistaccia_vera_-Pistachio-	Mediterranean_forest	Mediterranean	No_data	No_data	No_data	17.6792	11.9917	41.9289	582.43	33.9	5.3	28.6	11.8333	25.0167	25.25	10.9667	540	91	3	65.3884	251	25	29	224
C621H4	2021-12-01	Europe	Spain	37.34157464	-6.5901762	Crop	Pistaccia_vera_-Pistachio-	Mediterranean_forest	Mediterranean	No_data	No_data	No_data	17.6792	11.775	42.509	560.509	33.2	5.5	27.7	12.05	24.7167	24.9	11.1833	530	88	3	65.7045	246	23	27	219
C621H5	2021-12-01	Europe	Spain	37.38362122	-6.39364191	Crop	Pistaccia_vera_-Pistachio-	Mediterranean_forest	Mediterranean	No_data	No_data	No_data	17.8333	12.0667	42.3392	579.923	33.9	5.4	28.5	12.0167	25.1	25.4	11.1667	528	90	2	66.1325	247	23	28	219
C621H6	2021-12-01	Europe	Spain	37.37728212	-6.39653374	Crop	Pistaccia_vera_-Pistachio-	Mediterranean_forest	Mediterranean	No_data	No_data	No_data	17.7917	12.0333	42.2222	579.364	33.9	5.4	28.5	11.9667	25.0667	25.3333	11.1167	529	90	2	66.2636	247	22	27	219
C621H7	2021-12-01	Europe	Spain	37.35823139	-6.38987496	Crop	Pistaccia_vera_-Pistachio-	Mediterranean_forest	Mediterranean	No_data	No_data	No_data	17.6792	11.925	41.8421	582.059	33.9	5.4	28.5	11.85	25.0333	25.2333	10.9833	535	91	2	66.366	250	23	26	223
C621H9	2021-12-01	Europe	Spain	37.38865761	-6.59914843	Crop	Pistaccia_vera_-Pistachio-	Mediterranean_forest	Mediterranean	No_data	No_data	No_data	17.8417	11.9667	43.0456	560.559	33.3	5.5	27.8	12.2	24.8167	25.1	11.3333	510	86	3	66.0003	238	22	27	211
C621HA	2021-12-01	Europe	Spain	37.3069487	-6.55760671	Crop	Pistaccia_vera_-Pistachio-	Mediterranean_forest	Mediterranean	No_data	No_data	No_data	17.8	11.9167	43.0205	558	33.3	5.6	27.7	12.1833	24.8	25	11.3333	526	88	2	66.0973	245	22	26	218
C621HB	2021-12-01	Europe	Spain	37.37396877	-6.3979215	Crop	Pistaccia_vera_-Pistachio-	Mediterranean_forest	Mediterranean	No_data	No_data	No_data	17.6792	11.9917	41.9289	582.43	33.9	5.3	28.6	11.8333	25.0167	25.25	10.9667	540	91	3	65.3884	251	25	29	224
C621HF	2021-12-01	Europe	Spain	37.35284037	-6.58576891	Crop	Pistaccia_vera_-Pistachio-	Mediterranean_forest	Mediterranean	No_data	No_data	No_data	17.6083	11.8333	42.5659	562.974	33.2	5.4	27.8	11.95	24.6667	24.8833	11.1	531	88	3	65.8625	247	23	27	220
C621HG	2021-12-01	Europe	Spain	37.37333335	-6.3963422	Crop	Pistaccia_vera_-Pistachio-	Mediterranean_forest	Mediterranean	No_data	No_data	No_data	17.6792	11.9917	41.9289	582.43	33.9	5.3	28.6	11.8333	25.0167	25.25	10.9667	540	91	3	65.3884	251	25	29	224
C621HH	2021-12-01	Europe	Spain	37.31150055	-6.51073101	Crop	Pistaccia_vera_-Pistachio-	Mediterranean_forest	Mediterranean	No_data	No_data	No_data	17.7875	11.8417	42.5959	561.804	33.4	5.6	27.8	12.1333	24.8333	25.0333	11.2667	526	88	2	66.3773	246	22	26	218
C621HK	2021-12-01	Europe	Spain	37.34032607	-6.5907563	Crop	Pistaccia_vera_-Pistachio-	Mediterranean_forest	Mediterranean	No_data	No_data	No_data	17.6792	11.775	42.509	560.509	33.2	5.5	27.7	12.05	24.7167	24.9	11.1833	530	88	3	65.7045	246	23	27	219
C621HL	2021-12-01	Europe	Spain	37.30847603	-6.50810227	Crop	Pistaccia_vera_-Pistachio-	Mediterranean_forest	Mediterranean	No_data	No_data	No_data	17.7417	11.8	42.5993	561.847	33.3	5.6	27.7	12.0833	24.8	24.9667	11.2167	529	89	2	66.3985	247	22	26	219
C621HM	2021-12-01	Europe	Spain	37.3777407	-6.39623265	Crop	Pistaccia_vera_-Pistachio-	Mediterranean_forest	Mediterranean	No_data	No_data	No_data	17.7917	12.0333	42.2222	579.364	33.9	5.4	28.5	11.9667	25.0667	25.3333	11.1167	529	90	2	66.2636	247	22	27	219
C621HO	2021-12-01	Europe	Spain	37.32071974	-6.52702585	Crop	Pistaccia_vera_-Pistachio-	Mediterranean_forest	Mediterranean	No_data	No_data	No_data	17.8208	11.8583	42.6559	562.533	33.4	5.6	27.8	12.15	24.8833	25.0667	11.3	521	88	2	66.7078	244	22	25	217
C621HP	2021-12-01	Europe	Spain	37.34113283	-6.5605825	Crop	Pistaccia_vera_-Pistachio-	Mediterranean_forest	Mediterranean	No_data	No_data	No_data	17.7583	11.8833	42.9001	560.214	33.3	5.6	27.7	12.1167	24.8	24.9833	11.2667	527	88	2	66.0404	245	22	26	218
C621HS	2021-12-01	Europe	Spain	37.35184517	-6.55594761	Crop	Pistaccia_vera_-Pistachio-	Mediterranean_forest	Mediterranean	No_data	No_data	No_data	17.6542	11.8917	42.6225	564.899	33.3	5.4	27.9	11.9667	24.7333	24.95	11.1	532	88	3	65.3852	246	24	27	219
C621HT	2021-12-01	Europe	Spain	37.35237567	-6.5846765	Crop	Pistaccia_vera_-Pistachio-	Mediterranean_forest	Mediterranean	No_data	No_data	No_data	17.6083	11.8333	42.5659	562.974	33.2	5.4	27.8	11.95	24.6667	24.8833	11.1	531	88	3	65.8625	247	23	27	220
C621HU	2021-12-01	Europe	Spain	37.32227813	-6.55911103	Crop	Pistaccia_vera_-Pistachio-	Mediterranean_forest	Mediterranean	No_data	No_data	No_data	17.7458	11.8917	42.7758	560.063	33.3	5.5	27.8	12.1	24.7833	24.9667	11.25	527	88	3	65.6915	245	23	27	218
C621HY	2021-12-01	Europe	Spain	37.38254706	-6.39476112	Crop	Pistaccia_vera_-Pistachio-	Mediterranean_forest	Mediterranean	No_data	No_data	No_data	17.7917	12.0333	42.2222	579.364	33.9	5.4	28.5	11.9667	25.0667	25.3333	11.1167	529	90	2	66.2636	247	22	27	219
C621H2	2021-12-01	Europe	Spain	37.240747	-6.118538	Crop	Pistaccia_vera_-Pistachio-	Mediterranean_forest	Mediterranean	No_data	No_data	No_data	18.025	11.3833	42.1605	551.352	33	6	27	12.45	24.9	25.0833	11.5667	528	93	2	67.6891	250	21	26	224
C621GO	2021-12-01	Europe	Spain	37.3424	-6.3909	Crop	Pistaccia_vera_-Pistachio-	Mediterranean_forest	Mediterranean	No_data	No_data	No_data	17.775	11.8667	41.784	579.229	33.9	5.5	28.4	11.95	25.0833	25.2667	11.0833	529	90	2	66.5264	248	23	26	220
C621H8	2021-12-01	Europe	Spain	37.34154447	-6.38901722	Crop	Pistaccia_vera_-Pistachio-	Mediterranean_forest	Mediterranean	No_data	No_data	No_data	17.7708	11.8083	41.7256	576.981	33.8	5.5	28.3	11.9667	25.05	25.2333	11.1	524	90	2	66.8536	247	22	26	220
C621HN	2021-12-01	Europe	Spain	37.34346155	-6.38926848	Crop	Pistaccia_vera_-Pistachio-	Mediterranean_forest	Mediterranean	No_data	No_data	No_data	17.775	11.8667	41.784	579.229	33.9	5.5	28.4	11.95	25.0833	25.2667	11.0833	529	90	2	66.5264	248	23	26	220
C621HW	2021-12-01	Europe	Spain	37.34293912	-6.38942986	Crop	Pistaccia_vera_-Pistachio-	Mediterranean_forest	Mediterranean	No_data	No_data	No_data	17.775	11.8667	41.784	579.229	33.9	5.5	28.4	11.95	25.0833	25.2667	11.0833	529	90	2	66.5264	248	23	26	220
C621GU	2021-12-01	Europe	Spain	37.28947738	-6.75	Crop	Pistaccia_vera_-Pistachio-	Mediterranean_forest	Mediterranean	No_data	No_data	No_data	17.7375	11.375	42.444	548.204	32.7	5.9	26.8	12.2667	24.5667	24.8167	11.3833	508	85	2	67.3905	240	21	24	211
C621HE	2021-12-01	Europe	Spain	37.29265037	-6.75	Crop	Pistaccia_vera_-Pistachio-	Mediterranean_forest	Mediterranean	No_data	No_data	No_data	17.8292	11.4583	42.596	548.272	32.8	5.9	26.9	12.3333	24.6667	24.9	11.4667	500	84	2	67.6509	237	21	24	208
C6203B	2021-12-01	Europe	Spain	41.101808	-5.113789	Crop	Pistaccia_vera_-Pistachio-	Mediterranean_forest	Mediterranean	Yes	Yes	Chemical	11.9667	11.9167	40.1235	631.363	29.5	-0.2	29.7	8.26667	20.0167	20.0833	4.75	402	46	14	31.6436	129	61	66	115
C6203D	2021-12-01	Europe	Spain	41.037546	-5.133042	Crop	Pistaccia_vera_-Pistachio-	Mediterranean_forest	Mediterranean	Yes	Yes	Chemical	11.8375	11.875	40.1182	628.621	29.3	-0.3	29.6	8.16667	19.8667	19.9167	4.66667	399	45	14	31.2515	128	61	65	114
C6203K	2021-12-01	Europe	Spain	41.102455	-5.113163	Crop	Pistaccia_vera_-Pistachio-	Mediterranean_forest	Mediterranean	Yes	Yes	Chemical	11.9667	11.9167	40.1235	631.363	29.5	-0.2	29.7	8.26667	20.0167	20.0833	4.75	402	46	14	31.6436	129	61	66	115
C6203L	2021-12-01	Europe	Spain	41.105231	-5.112507	Crop	Pistaccia_vera_-Pistachio-	Mediterranean_forest	Mediterranean	Yes	Yes	Chemical	11.9667	11.9167	40.1235	631.363	29.5	-0.2	29.7	8.26667	20.0167	20.0833	4.75	402	46	14	31.6436	129	61	66	115
C6203J	2021-12-01	Europe	Spain	41.161616	-5.353437	Crop	Pistaccia_vera_-Pistachio-	Mediterranean_forest	Mediterranean	No_data	No_data	No_data	11.9958	12.025	40.2174	633.911	29.7	-0.2	29.9	5.4	20.1167	20.15	4.78333	442	52	14	33.3355	147	62	67	136
C6219A	2021-12-01	Europe	Spain	39.58747222	-0.39613889	Natural	Pasture	Mediterranean_forest	Mediterranean	No_data	No_data	No_data	17.1708	9.79167	40.7986	530.143	29.8	5.8	24	14.6	23.8333	24.15	11.2333	425	72	9	45.7018	167	50	76	112
C6219G	2021-12-01	Europe	Spain	39.58941667	-0.39683333	Natural	Pasture	Mediterranean_forest	Mediterranean	No_data	No_data	No_data	17.1708	9.79167	40.7986	530.143	29.8	5.8	24	14.6	23.8333	24.15	11.2333	425	72	9	45.7018	167	50	76	112
C62036	2021-12-01	Europe	Spain	40.48321	-6.12384	Natural	Pasture	Mediterranean_forest	Mediterranean	No	No	No_data	10.2917	8.1	34.0336	573.957	24.3	0.5	23.8	5.1	18.0333	18.0333	4.16667	1140	170	17	53.3039	461	82	82	455
C6203G	2021-12-01	Europe	Spain	41.172485	-5.380334	Crop	Helianthus_annuus_-Sunflower-	Mediterranean_forest	Mediterranean	No	Yes	Chemical	12.0542	12.025	40.3523	629.937	29.7	-0.1	29.8	5.5	20.1167	20.1667	4.88333	448	53	15	32.8725	148	64	69	137
C6203O	2021-12-01	Europe	Spain	41.157298	-5.389472	Crop	Helianthus_annuus_-Sunflower-	Mediterranean_forest	Mediterranean	Yes	Yes	Chemical	11.9792	12.0083	40.2964	629.41	29.6	-0.2	29.8	5.43333	20.05	20.0667	4.8	449	53	15	33.4174	150	63	69	138
C6203Y	2021-12-01	Europe	Spain	41.154263	-5.399661	Crop	Helianthus_annuus_-Sunflower-	Mediterranean_forest	Mediterranean	No	Yes	Chemical	11.9542	11.975	40.3199	628.004	29.5	-0.2	29.7	5.43333	20	20.0333	4.8	447	53	14	33.9435	150	62	68	138
C62188	2021-12-02	Europe	Spain	39.82794444	-0.46266667	Crop	Citrus_spp._-Clementine-	Mediterranean_forest	Mediterranean	No_data	No_data	No_data	15.5708	11.025	41.6038	570.89	30	3.5	26.5	16.5	22.8667	23	9.16667	410	60	14	35.5752	143	67	86	93
C6218O	2021-12-02	Europe	Spain	39.82794444	-0.46266667	Crop	Citrus_spp._-Clementine-	Mediterranean_forest	Mediterranean	No_data	No_data	No_data	15.5708	11.025	41.6038	570.89	30	3.5	26.5	16.5	22.8667	23	9.16667	410	60	14	35.5752	143	67	86	93
C6219F	2021-12-02	Europe	Spain	39.82794444	-0.46266667	Crop	Citrus_spp._-Clementine-	Mediterranean_forest	Mediterranean	No_data	No_data	No_data	15.5708	11.025	41.6038	570.89	30	3.5	26.5	16.5	22.8667	23	9.16667	410	60	14	35.5752	143	67	86	93
C6218B	2021-12-02	Europe	Spain	39.82833333	-0.46330556	Crop	Diospyros_kaki_-Kaki-	Mediterranean_forest	Mediterranean	No_data	No_data	No_data	15.5708	11.025	41.6038	570.89	30	3.5	26.5	16.5	22.8667	23	9.16667	410	60	14	35.5752	143	67	86	93
C6219C	2021-12-02	Europe	Spain	39.82833333	-0.46330556	Crop	Diospyros_kaki_-Kaki-	Mediterranean_forest	Mediterranean	No_data	No_data	No_data	15.5708	11.025	41.6038	570.89	30	3.5	26.5	16.5	22.8667	23	9.16667	410	60	14	35.5752	143	67	86	93
C6219H	2021-12-02	Europe	Spain	39.82833333	-0.46330556	Crop	Diospyros_kaki_-Kaki-	Mediterranean_forest	Mediterranean	No_data	No_data	No_data	15.5708	11.025	41.6038	570.89	30	3.5	26.5	16.5	22.8667	23	9.16667	410	60	14	35.5752	143	67	86	93
C62184	2021-12-02	Europe	Spain	39.79247222	-0.46225	Crop	Olea_europea_-Olive-	Mediterranean_forest	Mediterranean	No_data	No_data	No_data	15.0292	11.1917	41.4506	581.45	29.9	2.9	27	15.9	22.5	22.5833	8.51667	416	59	16	33.503	141	72	88	91
C6218Q	2021-12-02	Europe	Spain	39.80205556	-0.46794444	Crop	Olea_europea_-Olive-	Mediterranean_forest	Mediterranean	No_data	No_data	No_data	15.2417	11.1167	41.3259	578.662	30	3.1	26.9	16.1667	22.65	22.7667	8.75	415	60	15	34.4911	143	71	88	92
C62190	2021-12-02	Europe	Spain	39.79247222	-0.46225	Crop	Olea_europea_-Olive-	Mediterranean_forest	Mediterranean	No_data	No_data	No_data	15.0292	11.1917	41.4506	581.45	29.9	2.9	27	15.9	22.5	22.5833	8.51667	416	59	16	33.503	141	72	88	91
C62198	2021-12-02	Europe	Spain	39.79247222	-0.46225	Crop	Olea_europea_-Olive-	Mediterranean_forest	Mediterranean	No_data	No_data	No_data	15.0292	11.1917	41.4506	581.45	29.9	2.9	27	15.9	22.5	22.5833	8.51667	416	59	16	33.503	141	72	88	91
C6219B	2021-12-02	Europe	Spain	39.80205556	-0.46794444	Crop	Olea_europea_-Olive-	Mediterranean_forest	Mediterranean	No_data	No_data	No_data	15.2417	11.1167	41.3259	578.662	30	3.1	26.9	16.1667	22.65	22.7667	8.75	415	60	15	34.4911	143	71	88	92
C6219D	2021-12-02	Europe	Spain	39.80205556	-0.46794444	Crop	Olea_europea_-Olive-	Mediterranean_forest	Mediterranean	No_data	No_data	No_data	15.2417	11.1167	41.3259	578.662	30	3.1	26.9	16.1667	22.65	22.7667	8.75	415	60	15	34.4911	143	71	88	92
C621GR	2021-12-02	Europe	Spain	37.34241057	-6.38944242	Crop	Pistaccia_vera_-Pistachio-	Mediterranean_forest	Mediterranean	No_data	No_data	No_data	17.775	11.8667	41.784	579.229	33.9	5.5	28.4	11.95	25.0833	25.2667	11.0833	529	90	2	66.5264	248	23	26	220
C62030	2021-12-02	Europe	Spain	40.45359	-6.05903	Natural	Pasture	Mediterranean_forest	Mediterranean	No	No	No_data	12.9958	9.775	37.8876	576.634	27.8	2	25.8	7.28333	20.55	20.55	6.53333	789	114	13	51.4827	317	63	63	315
C621GX	2021-12-03	Europe	Spain	37.34241057	-6.38944242	Crop	Pistaccia_vera_-Pistachio-	Mediterranean_forest	Mediterranean	No_data	No_data	No_data	17.775	11.8667	41.784	579.229	33.9	5.5	28.4	11.95	25.0833	25.2667	11.0833	529	90	2	66.5264	248	23	26	220
C62093	2021-12-07	Europe	Spain	40.54862	-6.14191	Natural	Quercus_pyrenaica_-Oak-	Mediterranean_forest	Mediterranean	No	No	No_data	10.6167	8.88333	36.4071	563.832	24.7	0.3	24.4	5.3	18.0833	18.0833	4.36667	1040	155	16	53.5235	423	77	77	421
C62189	2021-12-07	Europe	Spain	39.58527778	-0.39502778	Crop	Diospyros_kaki_-Kaki-	Mediterranean_forest	Mediterranean	No_data	No_data	No_data	17.1708	9.79167	40.7986	530.143	29.8	5.8	24	14.6	23.8333	24.15	11.2333	425	72	9	45.7018	167	50	76	112
C6218F	2021-12-07	Europe	Spain	39.58527778	-0.39502778	Crop	Diospyros_kaki_-Kaki-	Mediterranean_forest	Mediterranean	No_data	No_data	No_data	17.1708	9.79167	40.7986	530.143	29.8	5.8	24	14.6	23.8333	24.15	11.2333	425	72	9	45.7018	167	50	76	112
C6218K	2021-12-07	Europe	Spain	39.58527778	-0.39502778	Crop	Diospyros_kaki_-Kaki-	Mediterranean_forest	Mediterranean	No_data	No_data	No_data	17.1708	9.79167	40.7986	530.143	29.8	5.8	24	14.6	23.8333	24.15	11.2333	425	72	9	45.7018	167	50	76	112
C6218N	2021-12-07	Europe	Spain	39.58525	-0.39477778	Crop	Diospyros_kaki_-Kaki-	Mediterranean_forest	Mediterranean	No_data	No_data	No_data	17.1708	9.79167	40.7986	530.143	29.8	5.8	24	14.6	23.8333	24.15	11.2333	425	72	9	45.7018	167	50	76	112
C6218T	2021-12-07	Europe	Spain	39.58525	-0.39477778	Crop	Diospyros_kaki_-Kaki-	Mediterranean_forest	Mediterranean	No_data	No_data	No_data	17.1708	9.79167	40.7986	530.143	29.8	5.8	24	14.6	23.8333	24.15	11.2333	425	72	9	45.7018	167	50	76	112
C6218V	2021-12-07	Europe	Spain	39.58525	-0.39477778	Crop	Diospyros_kaki_-Kaki-	Mediterranean_forest	Mediterranean	No_data	No_data	No_data	17.1708	9.79167	40.7986	530.143	29.8	5.8	24	14.6	23.8333	24.15	11.2333	425	72	9	45.7018	167	50	76	112
C62185	2021-12-07	Europe	Spain	39.58461111	-0.39494444	Crop	Olea_europea_-Olive-	Mediterranean_forest	Mediterranean	No_data	No_data	No_data	17.1708	9.79167	40.7986	530.143	29.8	5.8	24	14.6	23.8333	24.15	11.2333	425	72	9	45.7018	167	50	76	112
C6218A	2021-12-07	Europe	Spain	39.58461111	-0.39494444	Crop	Olea_europea_-Olive-	Mediterranean_forest	Mediterranean	No_data	No_data	No_data	17.1708	9.79167	40.7986	530.143	29.8	5.8	24	14.6	23.8333	24.15	11.2333	425	72	9	45.7018	167	50	76	112
C62193	2021-12-07	Europe	Spain	39.58461111	-0.39494444	Crop	Olea_europea_-Olive-	Mediterranean_forest	Mediterranean	No_data	No_data	No_data	17.1708	9.79167	40.7986	530.143	29.8	5.8	24	14.6	23.8333	24.15	11.2333	425	72	9	45.7018	167	50	76	112
C62195	2021-12-07	Europe	Spain	39.58580556	-0.39638889	Natural	Pasture	Mediterranean_forest	Mediterranean	No_data	No_data	No_data	17.1708	9.79167	40.7986	530.143	29.8	5.8	24	14.6	23.8333	24.15	11.2333	425	72	9	45.7018	167	50	76	112
C62094	2021-12-10	Europe	Spain	41.10562	-6.74553	Natural	Quercus_ilex_-Spanish_Oak-	Mediterranean_forest	Mediterranean	Yes	Yes	Organic	14.3292	9.875	41.318	499.534	27.6	3.7	23.9	8.61667	20.6333	20.8	8.61667	1042	152	14	55.638	439	75	83	439
C620FG	2021-12-10	Europe	Spain	41.07279	-6.74117	Natural	Quercus_ilex_-Spanish_Oak-	Mediterranean_forest	Mediterranean	No	Yes	Organic	13.1542	9.65833	39.1026	535.989	27.2	2.5	24.7	7.13333	20.0167	20.1667	7.13333	1059	158	16	55.6404	451	81	84	451
C6209H	2021-12-10	Europe	Spain	41.1043	-6.74185	Crop	Opuntia_ficus-indica_-Nopal-	Mediterranean_forest	Mediterranean	No	No	No_data	14.3292	9.875	41.318	499.534	27.6	3.7	23.9	8.61667	20.6333	20.8	8.61667	1042	152	14	55.638	439	75	83	439
C6209K	2021-12-10	Europe	Spain	41.10693	-6.75013	Crop	Opuntia_ficus-indica_-Nopal-	Mediterranean_forest	Mediterranean	No	No	No_data	14.7125	9.85833	42.1296	484.872	27.6	4.2	23.4	9.13333	20.8	20.9667	9.13333	1025	149	13	55.5962	430	73	82	430
C62020	2021-12-10	Europe	Spain	41.10797	-6.75444	Crop	Citrus_spp._-Orange-	Mediterranean_forest	Mediterranean	No_data	Yes	Organic	14.7125	9.85833	42.1296	484.872	27.6	4.2	23.4	9.13333	20.8	20.9667	9.13333	1025	149	13	55.5962	430	73	82	430
C62022	2021-12-10	Europe	Spain	41.10812	-6.74861	Crop	Citrus_spp._-Orange-	Mediterranean_forest	Mediterranean	No	Yes	Organic	14.3292	9.875	41.318	499.534	27.6	3.7	23.9	8.61667	20.6333	20.8	8.61667	1042	152	14	55.638	439	75	83	439
C62028	2021-12-10	Europe	Spain	41.09413	-6.75666	Crop	Citrus_spp._-Orange-	Mediterranean_forest	Mediterranean	No	No	No_data	14.5167	9.75	41.4894	491.317	27.5	4	23.5	8.88333	20.7	20.8667	8.88333	1030	151	13	55.8335	434	73	81	434
C6208X	2021-12-10	Europe	Spain	41.10329	-6.74287	Crop	Citrus_spp._-Orange-	Mediterranean_forest	Mediterranean	Yes	Yes	Organic	14.3292	9.875	41.318	499.534	27.6	3.7	23.9	8.61667	20.6333	20.8	8.61667	1042	152	14	55.638	439	75	83	439
C620W4	2021-12-10	Europe	Spain	37.189356	-3.036023	Crop	Olea_europea_-Olive-	Mediterranean_forest	Mediterranean	No_data	No_data	No_data	13.025	14.2833	41.2813	713.234	33.4	-1.2	34.6	5.93333	22.2333	22.4	5.05	466	61	5	49.3788	175	33	35	168
C620WC	2021-12-10	Europe	Spain	37.207211	-3.018483	Crop	Olea_europea_-Olive-	Mediterranean_forest	Mediterranean	No_data	No_data	No_data	13.3333	14.5333	41.7625	711.137	33.7	-1.1	34.8	6.23333	22.5	22.6667	5.35	455	59	5	49.3962	171	32	34	163
C620WE	2021-12-10	Europe	Spain	37.192806	-3.036971	Crop	Olea_europea_-Olive-	Mediterranean_forest	Mediterranean	No_data	No_data	No_data	13.1417	14.35	41.3545	713.49	33.5	-1.2	34.7	6.01667	22.3333	22.5167	5.13333	458	60	5	50.0657	174	32	33	166
C620WG	2021-12-10	Europe	Spain	37.207278	-3.017667	Crop	Olea_europea_-Olive-	Mediterranean_forest	Mediterranean	No_data	No_data	No_data	13.3333	14.5333	41.7625	711.137	33.7	-1.1	34.8	6.23333	22.5	22.6667	5.35	455	59	5	49.3962	171	32	34	163
C620WP	2021-12-10	Europe	Spain	37.168222	-3.038167	Crop	Olea_europea_-Olive-	Mediterranean_forest	Mediterranean	No_data	No_data	No_data	12.6542	14.075	40.6792	719.098	33.1	-1.5	34.6	5.51667	21.9333	22.1333	4.61667	494	64	6	49.3002	184	35	37	177
C620WS	2021-12-10	Europe	Spain	37.189356	-3.036024	Crop	Olea_europea_-Olive-	Mediterranean_forest	Mediterranean	No_data	No_data	No_data	13.025	14.2833	41.2813	713.234	33.4	-1.2	34.6	5.93333	22.2333	22.4	5.05	466	61	5	49.3788	175	33	35	168
C620WV	2021-12-10	Europe	Spain	37.168222	-3.038169	Crop	Olea_europea_-Olive-	Mediterranean_forest	Mediterranean	No_data	No_data	No_data	12.6542	14.075	40.6792	719.098	33.1	-1.5	34.6	5.51667	21.9333	22.1333	4.61667	494	64	6	49.3002	184	35	37	177
C620WW	2021-12-10	Europe	Spain	37.2074	-3.018747	Crop	Olea_europea_-Olive-	Mediterranean_forest	Mediterranean	No_data	No_data	No_data	13.3333	14.5333	41.7625	711.137	33.7	-1.1	34.8	6.23333	22.5	22.6667	5.35	455	59	5	49.3962	171	32	34	163
C621HZ	2021-12-10	Europe	Spain	37.168222	-3.038167	Crop	Olea_europea_-Olive-	Mediterranean_forest	Mediterranean	No_data	No_data	No_data	12.6542	14.075	40.6792	719.098	33.1	-1.5	34.6	5.51667	21.9333	22.1333	4.61667	494	64	6	49.3002	184	35	37	177
C621I1	2021-12-10	Europe	Spain	37.207297	-3.018611	Crop	Olea_europea_-Olive-	Mediterranean_forest	Mediterranean	No_data	No_data	No_data	13.3333	14.5333	41.7625	711.137	33.7	-1.1	34.8	6.23333	22.5	22.6667	5.35	455	59	5	49.3962	171	32	34	163
C621I2	2021-12-10	Europe	Spain	37.192806	-3.036972	Crop	Olea_europea_-Olive-	Mediterranean_forest	Mediterranean	No_data	No_data	No_data	13.1417	14.35	41.3545	713.49	33.5	-1.2	34.7	6.01667	22.3333	22.5167	5.13333	458	60	5	50.0657	174	32	33	166
C621I3	2021-12-10	Europe	Spain	37.168222	-3.038168	Crop	Olea_europea_-Olive-	Mediterranean_forest	Mediterranean	No_data	No_data	No_data	12.6542	14.075	40.6792	719.098	33.1	-1.5	34.6	5.51667	21.9333	22.1333	4.61667	494	64	6	49.3002	184	35	37	177
C621I6	2021-12-10	Europe	Spain	37.189356	-3.036028	Crop	Olea_europea_-Olive-	Mediterranean_forest	Mediterranean	No_data	No_data	No_data	13.025	14.2833	41.2813	713.234	33.4	-1.2	34.6	5.93333	22.2333	22.4	5.05	466	61	5	49.3788	175	33	35	168
C621I9	2021-12-10	Europe	Spain	37.192806	-3.036971	Crop	Olea_europea_-Olive-	Mediterranean_forest	Mediterranean	No_data	No_data	No_data	13.1417	14.35	41.3545	713.49	33.5	-1.2	34.7	6.01667	22.3333	22.5167	5.13333	458	60	5	50.0657	174	32	33	166
C621IB	2021-12-10	Europe	Spain	37.189356	-3.036024	Crop	Olea_europea_-Olive-	Mediterranean_forest	Mediterranean	No_data	No_data	No_data	13.025	14.2833	41.2813	713.234	33.4	-1.2	34.6	5.93333	22.2333	22.4	5.05	466	61	5	49.3788	175	33	35	168
C621IC	2021-12-10	Europe	Spain	37.207211	-3.018483	Crop	Olea_europea_-Olive-	Mediterranean_forest	Mediterranean	No_data	No_data	No_data	13.3333	14.5333	41.7625	711.137	33.7	-1.1	34.8	6.23333	22.5	22.6667	5.35	455	59	5	49.3962	171	32	34	163
C621IF	2021-12-10	Europe	Spain	37.192806	-3.036973	Crop	Olea_europea_-Olive-	Mediterranean_forest	Mediterranean	No_data	No_data	No_data	13.1417	14.35	41.3545	713.49	33.5	-1.2	34.7	6.01667	22.3333	22.5167	5.13333	458	60	5	50.0657	174	32	33	166
C621II	2021-12-10	Europe	Spain	37.192806	-3.036972	Crop	Olea_europea_-Olive-	Mediterranean_forest	Mediterranean	No_data	No_data	No_data	13.1417	14.35	41.3545	713.49	33.5	-1.2	34.7	6.01667	22.3333	22.5167	5.13333	458	60	5	50.0657	174	32	33	166
C621IJ	2021-12-10	Europe	Spain	37.168222	-3.038166	Crop	Olea_europea_-Olive-	Mediterranean_forest	Mediterranean	No_data	No_data	No_data	12.6542	14.075	40.6792	719.098	33.1	-1.5	34.6	5.51667	21.9333	22.1333	4.61667	494	64	6	49.3002	184	35	37	177
C621IK	2021-12-10	Europe	Spain	37.207278	-3.017667	Crop	Olea_europea_-Olive-	Mediterranean_forest	Mediterranean	No_data	No_data	No_data	13.3333	14.5333	41.7625	711.137	33.7	-1.1	34.8	6.23333	22.5	22.6667	5.35	455	59	5	49.3962	171	32	34	163
C621IL	2021-12-10	Europe	Spain	37.806444	-2.625556	Crop	Olea_europea_-Olive-	Mediterranean_forest	Mediterranean	No_data	No_data	No_data	13.7417	14.1833	40.8742	725.17	34.1	-0.6	34.7	9.55	23.1	23.2833	5.65	422	52	6	45.5834	151	34	37	141
C621IM	2021-12-10	Europe	Spain	37.207211	-3.018482	Crop	Olea_europea_-Olive-	Mediterranean_forest	Mediterranean	No_data	No_data	No_data	13.3333	14.5333	41.7625	711.137	33.7	-1.1	34.8	6.23333	22.5	22.6667	5.35	455	59	5	49.3962	171	32	34	163
C621IN	2021-12-10	Europe	Spain	37.2074	-3.018747	Crop	Olea_europea_-Olive-	Mediterranean_forest	Mediterranean	No_data	No_data	No_data	13.3333	14.5333	41.7625	711.137	33.7	-1.1	34.8	6.23333	22.5	22.6667	5.35	455	59	5	49.3962	171	32	34	163
C621IP	2021-12-10	Europe	Spain	37.2074	-3.018748	Crop	Olea_europea_-Olive-	Mediterranean_forest	Mediterranean	No_data	No_data	No_data	13.3333	14.5333	41.7625	711.137	33.7	-1.1	34.8	6.23333	22.5	22.6667	5.35	455	59	5	49.3962	171	32	34	163
C621IU	2021-12-10	Europe	Spain	37.806444	-2.625557	Crop	Olea_europea_-Olive-	Mediterranean_forest	Mediterranean	No_data	No_data	No_data	13.7417	14.1833	40.8742	725.17	34.1	-0.6	34.7	9.55	23.1	23.2833	5.65	422	52	6	45.5834	151	34	37	141
C621IV	2021-12-10	Europe	Spain	37.806444	-2.625554	Crop	Olea_europea_-Olive-	Mediterranean_forest	Mediterranean	No_data	No_data	No_data	13.7417	14.1833	40.8742	725.17	34.1	-0.6	34.7	9.55	23.1	23.2833	5.65	422	52	6	45.5834	151	34	37	141
C621IX	2021-12-10	Europe	Spain	37.168222	-3.038167	Crop	Olea_europea_-Olive-	Mediterranean_forest	Mediterranean	No_data	No_data	No_data	12.6542	14.075	40.6792	719.098	33.1	-1.5	34.6	5.51667	21.9333	22.1333	4.61667	494	64	6	49.3002	184	35	37	177
C621IZ	2021-12-10	Europe	Spain	37.168222	-3.038167	Crop	Olea_europea_-Olive-	Mediterranean_forest	Mediterranean	No_data	No_data	No_data	12.6542	14.075	40.6792	719.098	33.1	-1.5	34.6	5.51667	21.9333	22.1333	4.61667	494	64	6	49.3002	184	35	37	177
C621J2	2021-12-10	Europe	Spain	37.207297	-3.018611	Crop	Olea_europea_-Olive-	Mediterranean_forest	Mediterranean	No_data	No_data	No_data	13.3333	14.5333	41.7625	711.137	33.7	-1.1	34.8	6.23333	22.5	22.6667	5.35	455	59	5	49.3962	171	32	34	163
C621J4	2021-12-10	Europe	Spain	37.189356	-3.036025	Crop	Olea_europea_-Olive-	Mediterranean_forest	Mediterranean	No_data	No_data	No_data	13.025	14.2833	41.2813	713.234	33.4	-1.2	34.6	5.93333	22.2333	22.4	5.05	466	61	5	49.3788	175	33	35	168
C621J6	2021-12-10	Europe	Spain	37.168222	-3.038165	Crop	Olea_europea_-Olive-	Mediterranean_forest	Mediterranean	No_data	No_data	No_data	12.6542	14.075	40.6792	719.098	33.1	-1.5	34.6	5.51667	21.9333	22.1333	4.61667	494	64	6	49.3002	184	35	37	177
C621J7	2021-12-10	Europe	Spain	37.192806	-3.036972	Crop	Olea_europea_-Olive-	Mediterranean_forest	Mediterranean	No_data	No_data	No_data	13.1417	14.35	41.3545	713.49	33.5	-1.2	34.7	6.01667	22.3333	22.5167	5.13333	458	60	5	50.0657	174	32	33	166
C621JF	2021-12-10	Europe	Spain	37.189356	-3.036025	Crop	Olea_europea_-Olive-	Mediterranean_forest	Mediterranean	No_data	No_data	No_data	13.025	14.2833	41.2813	713.234	33.4	-1.2	34.6	5.93333	22.2333	22.4	5.05	466	61	5	49.3788	175	33	35	168
C621JH	2021-12-10	Europe	Spain	37.189356	-3.036023	Crop	Olea_europea_-Olive-	Mediterranean_forest	Mediterranean	No_data	No_data	No_data	13.025	14.2833	41.2813	713.234	33.4	-1.2	34.6	5.93333	22.2333	22.4	5.05	466	61	5	49.3788	175	33	35	168
C621JJ	2021-12-10	Europe	Spain	37.207278	-3.017667	Crop	Olea_europea_-Olive-	Mediterranean_forest	Mediterranean	No_data	No_data	No_data	13.3333	14.5333	41.7625	711.137	33.7	-1.1	34.8	6.23333	22.5	22.6667	5.35	455	59	5	49.3962	171	32	34	163
C621JL	2021-12-10	Europe	Spain	37.207297	-3.01861	Crop	Olea_europea_-Olive-	Mediterranean_forest	Mediterranean	No_data	No_data	No_data	13.3333	14.5333	41.7625	711.137	33.7	-1.1	34.8	6.23333	22.5	22.6667	5.35	455	59	5	49.3962	171	32	34	163
C62021	2021-12-10	Europe	Spain	41.09615	-6.75646	Crop	Olea_europea_-Olive-	Mediterranean_forest	Mediterranean	Yes	Yes	Organic	14.5167	9.75	41.4894	491.317	27.5	4	23.5	8.88333	20.7	20.8667	8.88333	1030	151	13	55.8335	434	73	81	434
C62023	2021-12-10	Europe	Spain	41.09839	-6.75195	Crop	Olea_europea_-Olive-	Mediterranean_forest	Mediterranean	Yes	Yes	Organic	14.5167	9.75	41.4894	491.317	27.5	4	23.5	8.88333	20.7	20.8667	8.88333	1030	151	13	55.8335	434	73	81	434
C62024	2021-12-10	Europe	Spain	41.08802	-6.76339	Crop	Olea_europea_-Olive-	Mediterranean_forest	Mediterranean	Yes	Yes	Organic	14.4667	9.65	41.2393	491.317	27.4	4	23.4	8.83333	20.65	20.8167	8.83333	1032	151	13	55.7377	434	73	82	434
C62025	2021-12-10	Europe	Spain	41.09878	-6.75186	Crop	Olea_europea_-Olive-	Mediterranean_forest	Mediterranean	No	No	No_data	14.5167	9.75	41.4894	491.317	27.5	4	23.5	8.88333	20.7	20.8667	8.88333	1030	151	13	55.8335	434	73	81	434
C62026	2021-12-10	Europe	Spain	41.08507	-6.76229	Crop	Olea_europea_-Olive-	Mediterranean_forest	Mediterranean	No	Yes	Organic	14.4667	9.65	41.2393	491.317	27.4	4	23.4	8.83333	20.65	20.8167	8.83333	1032	151	13	55.7377	434	73	82	434
C62027	2021-12-10	Europe	Spain	41.10769	-6.74779	Crop	Olea_europea_-Olive-	Mediterranean_forest	Mediterranean	No_data	Yes	Organic	14.3292	9.875	41.318	499.534	27.6	3.7	23.9	8.61667	20.6333	20.8	8.61667	1042	152	14	55.638	439	75	83	439
C62029	2021-12-10	Europe	Spain	41.09422	-6.75595	Crop	Olea_europea_-Olive-	Mediterranean_forest	Mediterranean	No	No	No_data	14.5167	9.75	41.4894	491.317	27.5	4	23.5	8.88333	20.7	20.8667	8.88333	1030	151	13	55.8335	434	73	81	434
C6208Z	2021-12-10	Europe	Spain	41.10359	-6.74622	Crop	Olea_europea_-Olive-	Mediterranean_forest	Mediterranean	Yes	Yes	Organic	14.3292	9.875	41.318	499.534	27.6	3.7	23.9	8.61667	20.6333	20.8	8.61667	1042	152	14	55.638	439	75	83	439
C62091	2021-12-10	Europe	Spain	41.10563	-6.74428	Crop	Olea_europea_-Olive-	Mediterranean_forest	Mediterranean	Yes	Yes	Organic	14.3292	9.875	41.318	499.534	27.6	3.7	23.9	8.61667	20.6333	20.8	8.61667	1042	152	14	55.638	439	75	83	439
C62092	2021-12-10	Europe	Spain	41.10428	-6.73997	Crop	Olea_europea_-Olive-	Mediterranean_forest	Mediterranean	No	No	No_data	13.7583	9.81667	40.2322	519.444	27.5	3.1	24.4	7.9	20.3833	20.5167	7.9	1057	156	15	55.9667	449	78	83	449
C62095	2021-12-10	Europe	Spain	41.10769	-6.74895	Crop	Olea_europea_-Olive-	Mediterranean_forest	Mediterranean	No	Yes	Organic	14.3292	9.875	41.318	499.534	27.6	3.7	23.9	8.61667	20.6333	20.8	8.61667	1042	152	14	55.638	439	75	83	439
C62096	2021-12-10	Europe	Spain	41.08286	-6.76657	Crop	Olea_europea_-Olive-	Mediterranean_forest	Mediterranean	No	No	No_data	14.1458	9.525	40.5319	499.547	27.2	3.7	23.5	8.45	20.45	20.6167	8.45	1039	153	14	55.8364	440	75	82	440
C62097	2021-12-10	Europe	Spain	41.10778	-6.7492	Crop	Olea_europea_-Olive-	Mediterranean_forest	Mediterranean	No	Yes	Organic	14.3292	9.875	41.318	499.534	27.6	3.7	23.9	8.61667	20.6333	20.8	8.61667	1042	152	14	55.638	439	75	83	439
C62098	2021-12-10	Europe	Spain	41.10782	-6.74946	Crop	Olea_europea_-Olive-	Mediterranean_forest	Mediterranean	Yes	Yes	Organic	14.3292	9.875	41.318	499.534	27.6	3.7	23.9	8.61667	20.6333	20.8	8.61667	1042	152	14	55.638	439	75	83	439
C62099	2021-12-10	Europe	Spain	41.10486	-6.74365	Crop	Olea_europea_-Olive-	Mediterranean_forest	Mediterranean	No	Yes	Organic	14.3292	9.875	41.318	499.534	27.6	3.7	23.9	8.61667	20.6333	20.8	8.61667	1042	152	14	55.638	439	75	83	439
C6209A	2021-12-10	Europe	Spain	41.1027	-6.74294	Crop	Olea_europea_-Olive-	Mediterranean_forest	Mediterranean	Yes	Yes	Organic	14.3292	9.875	41.318	499.534	27.6	3.7	23.9	8.61667	20.6333	20.8	8.61667	1042	152	14	55.638	439	75	83	439
C6209D	2021-12-10	Europe	Spain	41.10528	-6.74562	Crop	Olea_europea_-Olive-	Mediterranean_forest	Mediterranean	No	No	No_data	14.3292	9.875	41.318	499.534	27.6	3.7	23.9	8.61667	20.6333	20.8	8.61667	1042	152	14	55.638	439	75	83	439
C6209F	2021-12-10	Europe	Spain	41.10543	-6.74454	Crop	Olea_europea_-Olive-	Mediterranean_forest	Mediterranean	No	No	No_data	14.3292	9.875	41.318	499.534	27.6	3.7	23.9	8.61667	20.6333	20.8	8.61667	1042	152	14	55.638	439	75	83	439
C6209L	2021-12-10	Europe	Spain	41.10423	-6.74213	Crop	Olea_europea_-Olive-	Mediterranean_forest	Mediterranean	No	No	No_data	14.3292	9.875	41.318	499.534	27.6	3.7	23.9	8.61667	20.6333	20.8	8.61667	1042	152	14	55.638	439	75	83	439
C6209N	2021-12-10	Europe	Spain	41.10447	-6.74359	Crop	Olea_europea_-Olive-	Mediterranean_forest	Mediterranean	No	Yes	Organic	14.3292	9.875	41.318	499.534	27.6	3.7	23.9	8.61667	20.6333	20.8	8.61667	1042	152	14	55.638	439	75	83	439
C620KE	2021-12-10	Europe	Spain	41.10712	-6.72557	Crop	Olea_europea_-Olive-	Mediterranean_forest	Mediterranean	No	Yes	Organic	13.1708	9.75833	39.3481	538.375	27.3	2.5	24.8	7.15	20.0667	20.2167	7.15	1064	158	16	55.71	453	81	84	453
C620W5	2021-12-10	Europe	Spain	37.638222	-2.199139	Crop	Prunus_dulcis_-Almond-	Mediterranean_forest	Mediterranean	No_data	No_data	No_data	12.775	13.9833	40.8869	718.592	32.9	-1.3	34.2	8.68333	22.0667	22.25	4.8	444	52	8	42.2545	150	40	43	142
C620WD	2021-12-10	Europe	Spain	37.629722	-2.274139	Crop	Prunus_dulcis_-Almond-	Mediterranean_forest	Mediterranean	No_data	No_data	No_data	12.1583	14.2167	40.619	735.474	32.9	-2.1	35	4.88333	21.65	21.8833	4	473	55	8	43.0551	162	41	45	154
C620WI	2021-12-10	Europe	Spain	37.638222	-2.199138	Crop	Prunus_dulcis_-Almond-	Mediterranean_forest	Mediterranean	No_data	No_data	No_data	12.775	13.9833	40.8869	718.592	32.9	-1.3	34.2	8.68333	22.0667	22.25	4.8	444	52	8	42.2545	150	40	43	142
C620WM	2021-12-10	Europe	Spain	37.629722	-2.274139	Crop	Prunus_dulcis_-Almond-	Mediterranean_forest	Mediterranean	No_data	No_data	No_data	12.1583	14.2167	40.619	735.474	32.9	-2.1	35	4.88333	21.65	21.8833	4	473	55	8	43.0551	162	41	45	154
C620WN	2021-12-10	Europe	Spain	37.629722	-2.274139	Crop	Prunus_dulcis_-Almond-	Mediterranean_forest	Mediterranean	No_data	No_data	No_data	12.1583	14.2167	40.619	735.474	32.9	-2.1	35	4.88333	21.65	21.8833	4	473	55	8	43.0551	162	41	45	154
C621I0	2021-12-10	Europe	Spain	37.638083	-2.199917	Crop	Prunus_dulcis_-Almond-	Mediterranean_forest	Mediterranean	No_data	No_data	No_data	12.775	13.9833	40.8869	718.592	32.9	-1.3	34.2	8.68333	22.0667	22.25	4.8	444	52	8	42.2545	150	40	43	142
C621I4	2021-12-10	Europe	Spain	37.627889	-2.273439	Crop	Prunus_dulcis_-Almond-	Mediterranean_forest	Mediterranean	No_data	No_data	No_data	12.1583	14.2167	40.619	735.474	32.9	-2.1	35	4.88333	21.65	21.8833	4	473	55	8	43.0551	162	41	45	154
C621IA	2021-12-10	Europe	Spain	37.638222	-2.199139	Crop	Prunus_dulcis_-Almond-	Mediterranean_forest	Mediterranean	No_data	No_data	No_data	12.775	13.9833	40.8869	718.592	32.9	-1.3	34.2	8.68333	22.0667	22.25	4.8	444	52	8	42.2545	150	40	43	142
C621IE	2021-12-10	Europe	Spain	37.627889	-2.273443	Crop	Prunus_dulcis_-Almond-	Mediterranean_forest	Mediterranean	No_data	No_data	No_data	12.1583	14.2167	40.619	735.474	32.9	-2.1	35	4.88333	21.65	21.8833	4	473	55	8	43.0551	162	41	45	154
C621IG	2021-12-10	Europe	Spain	37.627889	-2.273445	Crop	Prunus_dulcis_-Almond-	Mediterranean_forest	Mediterranean	No_data	No_data	No_data	12.1583	14.2167	40.619	735.474	32.9	-2.1	35	4.88333	21.65	21.8833	4	473	55	8	43.0551	162	41	45	154
C621IH	2021-12-10	Europe	Spain	37.638083	-2.199917	Crop	Prunus_dulcis_-Almond-	Mediterranean_forest	Mediterranean	No_data	No_data	No_data	12.775	13.9833	40.8869	718.592	32.9	-1.3	34.2	8.68333	22.0667	22.25	4.8	444	52	8	42.2545	150	40	43	142
C621IR	2021-12-10	Europe	Spain	37.638222	-2.199139	Crop	Prunus_dulcis_-Almond-	Mediterranean_forest	Mediterranean	No_data	No_data	No_data	12.775	13.9833	40.8869	718.592	32.9	-1.3	34.2	8.68333	22.0667	22.25	4.8	444	52	8	42.2545	150	40	43	142
C621IT	2021-12-10	Europe	Spain	37.627889	-2.273446	Crop	Prunus_dulcis_-Almond-	Mediterranean_forest	Mediterranean	No_data	No_data	No_data	12.1583	14.2167	40.619	735.474	32.9	-2.1	35	4.88333	21.65	21.8833	4	473	55	8	43.0551	162	41	45	154
C621IY	2021-12-10	Europe	Spain	37.638083	-2.199917	Crop	Prunus_dulcis_-Almond-	Mediterranean_forest	Mediterranean	No_data	No_data	No_data	12.775	13.9833	40.8869	718.592	32.9	-1.3	34.2	8.68333	22.0667	22.25	4.8	444	52	8	42.2545	150	40	43	142
C621J5	2021-12-10	Europe	Spain	37.629722	-2.274139	Crop	Prunus_dulcis_-Almond-	Mediterranean_forest	Mediterranean	No_data	No_data	No_data	12.1583	14.2167	40.619	735.474	32.9	-2.1	35	4.88333	21.65	21.8833	4	473	55	8	43.0551	162	41	45	154
C621J8	2021-12-10	Europe	Spain	37.638083	-2.199917	Crop	Prunus_dulcis_-Almond-	Mediterranean_forest	Mediterranean	No_data	No_data	No_data	12.775	13.9833	40.8869	718.592	32.9	-1.3	34.2	8.68333	22.0667	22.25	4.8	444	52	8	42.2545	150	40	43	142
C621J9	2021-12-10	Europe	Spain	37.629722	-2.274139	Crop	Prunus_dulcis_-Almond-	Mediterranean_forest	Mediterranean	No_data	No_data	No_data	12.1583	14.2167	40.619	735.474	32.9	-2.1	35	4.88333	21.65	21.8833	4	473	55	8	43.0551	162	41	45	154
C621JK	2021-12-10	Europe	Spain	37.627889	-2.273448	Crop	Prunus_dulcis_-Almond-	Mediterranean_forest	Mediterranean	No_data	No_data	No_data	12.1583	14.2167	40.619	735.474	32.9	-2.1	35	4.88333	21.65	21.8833	4	473	55	8	43.0551	162	41	45	154
C620WA	2021-12-10	Europe	Spain	37.444	-2.70011	Crop	Prunus_dulcis_-Almond-	Mediterranean_forest	Mediterranean	No_data	No_data	No_data	14.0458	13.7583	40.8259	703.825	33.7	0	33.7	7	23.1	23.2667	6.13333	396	50	5	47.4085	146	30	32	137
C620WF	2021-12-10	Europe	Spain	37.444	-2.700111	Crop	Prunus_dulcis_-Almond-	Mediterranean_forest	Mediterranean	No_data	No_data	No_data	14.0458	13.7583	40.8259	703.825	33.7	0	33.7	7	23.1	23.2667	6.13333	396	50	5	47.4085	146	30	32	137
C620WJ	2021-12-10	Europe	Spain	37.806444	-2.625555	Crop	Prunus_dulcis_-Almond-	Mediterranean_forest	Mediterranean	No_data	No_data	No_data	13.7417	14.1833	40.8742	725.17	34.1	-0.6	34.7	9.55	23.1	23.2833	5.65	422	52	6	45.5834	151	34	37	141
C620WO	2021-12-10	Europe	Spain	37.806444	-2.625554	Crop	Prunus_dulcis_-Almond-	Mediterranean_forest	Mediterranean	No_data	No_data	No_data	13.7417	14.1833	40.8742	725.17	34.1	-0.6	34.7	9.55	23.1	23.2833	5.65	422	52	6	45.5834	151	34	37	141
C620WQ	2021-12-10	Europe	Spain	37.444	-2.700115	Crop	Prunus_dulcis_-Almond-	Mediterranean_forest	Mediterranean	No_data	No_data	No_data	14.0458	13.7583	40.8259	703.825	33.7	0	33.7	7	23.1	23.2667	6.13333	396	50	5	47.4085	146	30	32	137
C621I5	2021-12-10	Europe	Spain	37.444	-2.700112	Crop	Prunus_dulcis_-Almond-	Mediterranean_forest	Mediterranean	No_data	No_data	No_data	14.0458	13.7583	40.8259	703.825	33.7	0	33.7	7	23.1	23.2667	6.13333	396	50	5	47.4085	146	30	32	137
C621I8	2021-12-10	Europe	Spain	37.444	-2.70011	Crop	Prunus_dulcis_-Almond-	Mediterranean_forest	Mediterranean	No_data	No_data	No_data	14.0458	13.7583	40.8259	703.825	33.7	0	33.7	7	23.1	23.2667	6.13333	396	50	5	47.4085	146	30	32	137
C621IS	2021-12-10	Europe	Spain	37.806444	-2.625556	Crop	Prunus_dulcis_-Almond-	Mediterranean_forest	Mediterranean	No_data	No_data	No_data	13.7417	14.1833	40.8742	725.17	34.1	-0.6	34.7	9.55	23.1	23.2833	5.65	422	52	6	45.5834	151	34	37	141
C621IW	2021-12-10	Europe	Spain	37.444	-2.700111	Crop	Prunus_dulcis_-Almond-	Mediterranean_forest	Mediterranean	No_data	No_data	No_data	14.0458	13.7583	40.8259	703.825	33.7	0	33.7	7	23.1	23.2667	6.13333	396	50	5	47.4085	146	30	32	137
C6208V	2021-12-10	Europe	Spain	41.10474	-6.74547	Crop	Prunus_dulcis_-Almond-	Mediterranean_forest	Mediterranean	No	No	No_data	14.3292	9.875	41.318	499.534	27.6	3.7	23.9	8.61667	20.6333	20.8	8.61667	1042	152	14	55.638	439	75	83	439
C6209I	2021-12-10	Europe	Spain	41.10432	-6.74028	Crop	Prunus_dulcis_-Almond-	Mediterranean_forest	Mediterranean	No	No	No_data	13.7583	9.81667	40.2322	519.444	27.5	3.1	24.4	7.9	20.3833	20.5167	7.9	1057	156	15	55.9667	449	78	83	449
C620FH	2021-12-10	Europe	Spain	41.07354	-6.72638	Crop	Prunus_dulcis_-Almond-	Mediterranean_forest	Mediterranean	Yes	Yes	Organic	13.0208	9.74167	38.9667	542.262	27.3	2.3	25	6.95	19.9833	20.1167	6.95	1061	158	16	55.6621	452	82	83	452
C620KA	2021-12-10	Europe	Spain	41.0999	-6.72978	Crop	Prunus_dulcis_-Almond-	Mediterranean_forest	Mediterranean	No	No	No_data	13.625	9.9	40.2439	524.212	27.5	2.9	24.6	7.7	20.3	20.4667	7.7	1057	157	15	55.8991	450	79	83	450
C620KB	2021-12-10	Europe	Spain	41.09977	-6.72887	Crop	Prunus_dulcis_-Almond-	Mediterranean_forest	Mediterranean	No	No	No_data	13.625	9.9	40.2439	524.212	27.5	2.9	24.6	7.7	20.3	20.4667	7.7	1057	157	15	55.8991	450	79	83	450
C620KC	2021-12-10	Europe	Spain	41.10752	-6.72607	Crop	Prunus_dulcis_-Almond-	Mediterranean_forest	Mediterranean	Yes	Yes	Organic	13.1708	9.75833	39.3481	538.375	27.3	2.5	24.8	7.15	20.0667	20.2167	7.15	1064	158	16	55.71	453	81	84	453
C620KF	2021-12-10	Europe	Spain	41.08142	-6.72027	Crop	Prunus_dulcis_-Almond-	Mediterranean_forest	Mediterranean	Yes	Yes	Organic	12.9125	9.85833	38.9657	545.365	27.4	2.1	25.3	6.83333	19.9167	20.0667	6.83333	1060	158	16	55.7424	452	82	83	452
C620KG	2021-12-10	Europe	Spain	41.08045	-6.72648	Crop	Prunus_dulcis_-Almond-	Mediterranean_forest	Mediterranean	No	Yes	Organic	13.0208	9.74167	38.9667	542.262	27.3	2.3	25	6.95	19.9833	20.1167	6.95	1059	158	16	55.8574	452	81	83	452
C620KH	2021-12-10	Europe	Spain	41.08002	-6.7267	Crop	Prunus_dulcis_-Almond-	Mediterranean_forest	Mediterranean	No	Yes	Organic	13.0208	9.74167	38.9667	542.262	27.3	2.3	25	6.95	19.9833	20.1167	6.95	1059	158	16	55.8574	452	81	83	452
C620KI	2021-12-10	Europe	Spain	41.07693	-6.72669	Crop	Prunus_dulcis_-Almond-	Mediterranean_forest	Mediterranean	No	Yes	Organic	13.0208	9.74167	38.9667	542.262	27.3	2.3	25	6.95	19.9833	20.1167	6.95	1059	158	16	55.8574	452	81	83	452
C620KJ	2021-12-10	Europe	Spain	41.07539	-6.7286	Crop	Prunus_dulcis_-Almond-	Mediterranean_forest	Mediterranean	No	No	No_data	13.0208	9.74167	38.9667	542.262	27.3	2.3	25	6.95	19.9833	20.1167	6.95	1059	158	16	55.8574	452	81	83	452
C62119	2021-12-10	Europe	Spain	41.07386	-6.73012	Crop	Prunus_dulcis_-Almond-	Mediterranean_forest	Mediterranean	No	Yes	Organic	13.0208	9.74167	38.9667	542.262	27.3	2.3	25	6.95	19.9833	20.1167	6.95	1061	158	16	55.6621	452	82	83	452
C6211B	2021-12-10	Europe	Spain	41.07247	-6.72955	Crop	Prunus_dulcis_-Almond-	Mediterranean_forest	Mediterranean	No	Yes	Organic	13.0208	9.74167	38.9667	542.262	27.3	2.3	25	6.95	19.9833	20.1167	6.95	1061	158	16	55.6621	452	82	83	452
C6211C	2021-12-10	Europe	Spain	41.0714	-6.73282	Crop	Prunus_dulcis_-Almond-	Mediterranean_forest	Mediterranean	No	Yes	Organic	13.0208	9.74167	38.9667	542.262	27.3	2.3	25	6.95	19.9833	20.1167	6.95	1061	158	16	55.6621	452	82	83	452
C6211D	2021-12-10	Europe	Spain	41.07132	-6.73232	Crop	Prunus_dulcis_-Almond-	Mediterranean_forest	Mediterranean	No	Yes	Organic	13.0208	9.74167	38.9667	542.262	27.3	2.3	25	6.95	19.9833	20.1167	6.95	1061	158	16	55.6621	452	82	83	452
C6211F	2021-12-10	Europe	Spain	41.07206	-6.73602	Crop	Prunus_dulcis_-Almond-	Mediterranean_forest	Mediterranean	Yes	No	No_data	13.1542	9.65833	39.1026	535.989	27.2	2.5	24.7	7.13333	20.0167	20.1667	7.13333	1059	158	16	55.6404	451	81	84	451
C6211G	2021-12-10	Europe	Spain	41.07251	-6.73784	Crop	Prunus_dulcis_-Almond-	Mediterranean_forest	Mediterranean	No	Yes	Organic	13.1542	9.65833	39.1026	535.989	27.2	2.5	24.7	7.13333	20.0167	20.1667	7.13333	1059	158	16	55.6404	451	81	84	451
C6211H	2021-12-10	Europe	Spain	41.07063	-6.74069	Crop	Prunus_dulcis_-Almond-	Mediterranean_forest	Mediterranean	No	Yes	Organic	13.1542	9.65833	39.1026	535.989	27.2	2.5	24.7	7.13333	20.0167	20.1667	7.13333	1059	158	16	55.6404	451	81	84	451
C6211I	2021-12-10	Europe	Spain	41.07241	-6.74179	Crop	Prunus_dulcis_-Almond-	Mediterranean_forest	Mediterranean	No	Yes	Organic	13.3125	9.54167	38.9456	530.678	27.2	2.7	24.5	7.35	20.1	20.25	7.35	1056	157	15	55.8273	449	79	83	449
C6205P	2021-12-10	Europe	Spain	40.22945966	-3.38844298	Crop	Allium_ampeloprasum_-Leek-	Mediterranean_forest	Mediterranean	No	Yes	Organic	14.4917	12.4833	38.5288	706.904	33.2	0.8	32.4	10.2667	23.7167	23.7167	6.48333	405	55	8	42.5971	151	43	43	125
C6205V	2021-12-10	Europe	Spain	40.22904062	-3.38501347	Crop	Allium_cepa_-Onion-	Mediterranean_forest	Mediterranean	No	Yes	Organic	14.4917	12.4833	38.5288	706.904	33.2	0.8	32.4	10.2667	23.7167	23.7167	6.48333	405	55	8	42.5971	151	43	43	125
C6205Q	2021-12-10	Europe	Spain	40.22916715	-3.38517921	Crop	Allium_sativum_-Garlic-	Mediterranean_forest	Mediterranean	No	Yes	Organic	14.4917	12.4833	38.5288	706.904	33.2	0.8	32.4	10.2667	23.7167	23.7167	6.48333	405	55	8	42.5971	151	43	43	125
C6205R	2021-12-10	Europe	Spain	40.22886081	-3.38807958	Crop	Apium_graveolens_-Celery-	Mediterranean_forest	Mediterranean	No	Yes	Organic	14.4917	12.4833	38.5288	706.904	33.2	0.8	32.4	10.2667	23.7167	23.7167	6.48333	405	55	8	42.5971	151	43	43	125
C6205N	2021-12-10	Europe	Spain	40.22859442	-3.38738611	Crop	Beta_vulgaris_-Chard-	Mediterranean_forest	Mediterranean	No	Yes	Organic	14.4917	12.4833	38.5288	706.904	33.2	0.8	32.4	10.2667	23.7167	23.7167	6.48333	405	55	8	42.5971	151	43	43	125
C6205M	2021-12-10	Europe	Spain	40.22954009	-3.3849873	Crop	Brassica_napus_-Rutabaga-	Mediterranean_forest	Mediterranean	No	Yes	Organic	14.4917	12.4833	38.5288	706.904	33.2	0.8	32.4	10.2667	23.7167	23.7167	6.48333	405	55	8	42.5971	151	43	43	125
C6205O	2021-12-10	Europe	Spain	40.22946607	-3.38802065	Crop	Brassica_oleracea_-Broccoli-	Mediterranean_forest	Mediterranean	Yes	Yes	Organic	14.4917	12.4833	38.5288	706.904	33.2	0.8	32.4	10.2667	23.7167	23.7167	6.48333	405	55	8	42.5971	151	43	43	125
C6205K	2021-12-10	Europe	Spain	40.22852577	-3.3874797	Crop	Brassica_oleracea_-Kale-	Mediterranean_forest	Mediterranean	No	Yes	Organic	14.4917	12.4833	38.5288	706.904	33.2	0.8	32.4	10.2667	23.7167	23.7167	6.48333	405	55	8	42.5971	151	43	43	125
C6205U	2021-12-10	Europe	Spain	40.22869098	-3.3849306	Crop	Brassica_oleracea_-Kale-	Mediterranean_forest	Mediterranean	No	Yes	Organic	14.4917	12.4833	38.5288	706.904	33.2	0.8	32.4	10.2667	23.7167	23.7167	6.48333	405	55	8	42.5971	151	43	43	125
C62060	2021-12-10	Europe	Spain	40.22960003	-3.38524899	Crop	Spinacia_oleracea_-Spinach-	Mediterranean_forest	Mediterranean	No	Yes	Organic	14.4917	12.4833	38.5288	706.904	33.2	0.8	32.4	10.2667	23.7167	23.7167	6.48333	405	55	8	42.5971	151	43	43	125
C620W6	2021-12-10	Europe	Spain	37.6295	-2.269531	Natural	Pasture	Mediterranean_forest	Mediterranean	No_data	No_data	No_data	12.1583	14.2167	40.619	735.474	32.9	-2.1	35	4.88333	21.65	21.8833	4	473	55	8	43.0551	162	41	45	154
C620WL	2021-12-10	Europe	Spain	37.6295	-2.269525	Natural	Pasture	Mediterranean_forest	Mediterranean	No_data	No_data	No_data	12.1583	14.2167	40.619	735.474	32.9	-2.1	35	4.88333	21.65	21.8833	4	473	55	8	43.0551	162	41	45	154
C620WU	2021-12-10	Europe	Spain	37.6295	-2.269528	Natural	Pasture	Mediterranean_forest	Mediterranean	No_data	No_data	No_data	12.1583	14.2167	40.619	735.474	32.9	-2.1	35	4.88333	21.65	21.8833	4	473	55	8	43.0551	162	41	45	154
C621JM	2021-12-10	Europe	Spain	37.6295	-2.269518	Natural	Pasture	Mediterranean_forest	Mediterranean	No_data	No_data	No_data	12.1583	14.2167	40.619	735.474	32.9	-2.1	35	4.88333	21.65	21.8833	4	473	55	8	43.0551	162	41	45	154
C620W7	2021-12-10	Europe	Spain	37.390156	-3.104972	Natural	Pasture	Mediterranean_forest	Mediterranean	No_data	No_data	No_data	13.8583	14.45	41.523	712.932	34.3	-0.5	34.8	6.71667	23.05	23.2333	5.88333	442	58	5	49.6522	166	31	32	158
C620WX	2021-12-10	Europe	Spain	37.390156	-3.104974	Natural	Pasture	Mediterranean_forest	Mediterranean	No_data	No_data	No_data	13.8583	14.45	41.523	712.932	34.3	-0.5	34.8	6.71667	23.05	23.2333	5.88333	442	58	5	49.6522	166	31	32	158
C621J0	2021-12-10	Europe	Spain	37.390156	-3.104971	Natural	Pasture	Mediterranean_forest	Mediterranean	No_data	No_data	No_data	13.8583	14.45	41.523	712.932	34.3	-0.5	34.8	6.71667	23.05	23.2333	5.88333	442	58	5	49.6522	166	31	32	158
C621J1	2021-12-10	Europe	Spain	37.390156	-3.104973	Natural	Pasture	Mediterranean_forest	Mediterranean	No_data	No_data	No_data	13.8583	14.45	41.523	712.932	34.3	-0.5	34.8	6.71667	23.05	23.2333	5.88333	442	58	5	49.6522	166	31	32	158
C621J3	2021-12-10	Europe	Spain	37.390156	-3.104972	Natural	Pasture	Mediterranean_forest	Mediterranean	No_data	No_data	No_data	13.8583	14.45	41.523	712.932	34.3	-0.5	34.8	6.71667	23.05	23.2333	5.88333	442	58	5	49.6522	166	31	32	158
C6218G	2021-12-10	Europe	Spain	39.65113889	-0.41441667	Natural	Pasture	Mediterranean_forest	Mediterranean	No_data	No_data	No_data	15.8958	10.325	40.6496	559.214	29.7	4.3	25.4	16.9167	23.0167	23.2167	9.65	422	65	13	37.6324	153	63	84	101
C6218I	2021-12-10	Europe	Spain	39.65141667	-0.41516667	Natural	Pasture	Mediterranean_forest	Mediterranean	No_data	No_data	No_data	15.8958	10.325	40.6496	559.214	29.7	4.3	25.4	16.9167	23.0167	23.2167	9.65	422	65	13	37.6324	153	63	84	101
C620KD	2021-12-10	Europe	Spain	41.1076	-6.72631	Natural	Pasture	Mediterranean_forest	Mediterranean	No	No	No_data	13.1708	9.75833	39.3481	538.375	27.3	2.5	24.8	7.15	20.0667	20.2167	7.15	1064	158	16	55.71	453	81	84	453
C6211A	2021-12-10	Europe	Spain	41.07422	-6.72995	Natural	Pasture	Mediterranean_forest	Mediterranean	No	Yes	Organic	13.0208	9.74167	38.9667	542.262	27.3	2.3	25	6.95	19.9833	20.1167	6.95	1061	158	16	55.6621	452	82	83	452
C6211E	2021-12-10	Europe	Spain	41.07222	-6.73244	Crop	Vitis_vinifera_-Vine-	Mediterranean_forest	Mediterranean	No	Yes	Organic	13.0208	9.74167	38.9667	542.262	27.3	2.3	25	6.95	19.9833	20.1167	6.95	1061	158	16	55.6621	452	82	83	452
C62079	2021-12-11	Europe	Spain	41.708275	-5.527964	Crop	Secale_cereale_-Rye-	Mediterranean_forest	Mediterranean	Yes	Yes	Chemical	12.5083	11.6833	40.2874	617.87	29.4	0.4	29	6.11667	20.4667	20.4667	5.43333	563	71	17	36.8464	198	71	71	190
C6206M	2021-12-11	Europe	Spain	41.703333	-5.558734	Crop	Triticum_aestivum_-Wheat-	Mediterranean_forest	Mediterranean	Yes	Yes	Chemical	12.4708	11.675	40.2586	618.747	29.4	0.4	29	6.08333	20.4333	20.4333	5.4	576	74	17	37.7914	205	71	71	197
C62074	2021-12-11	Europe	Spain	41.727075	-5.54763	Crop	Triticum_aestivum_-Wheat-	Mediterranean_forest	Mediterranean	Yes	Yes	Chemical	12.45	11.6167	40.1961	616.707	29.3	0.4	28.9	6.06667	20.3833	20.3833	5.38333	568	73	18	37.1821	202	72	72	194
C6207B	2021-12-11	Europe	Spain	41.730407	-5.557673	Crop	Triticum_aestivum_-Wheat-	Mediterranean_forest	Mediterranean	Yes	Yes	Chemical	12.4417	11.6	40.1384	617.55	29.3	0.4	28.9	6.05	20.3833	20.3833	5.38333	570	73	18	37.2641	202	72	72	194
C6207D	2021-12-11	Europe	Spain	41.65793	-5.612723	Crop	Triticum_aestivum_-Wheat-	Mediterranean_forest	Mediterranean	Yes	Yes	Chemical	12.625	11.6667	40.3691	611.286	29.4	0.5	28.9	6.28333	20.4667	20.4667	5.61667	589	76	17	39.001	212	70	74	206
C6207I	2021-12-11	Europe	Spain	41.571337	-5.689455	Crop	Triticum_aestivum_-Wheat-	Mediterranean_forest	Mediterranean	No	No	No_data	12.6083	11.6167	40.7602	601.819	29	0.5	28.5	6.36667	20.3	20.3167	5.68333	623	81	16	40.8458	227	70	73	224
C6206X	2021-12-11	Europe	Spain	41.707611	-5.527482	Crop	Pistaccia_vera_-Pistachio-	Mediterranean_forest	Mediterranean	Yes	Yes	Organic	12.5083	11.6833	40.2874	617.87	29.4	0.4	29	6.11667	20.4667	20.4667	5.43333	563	71	17	36.8464	198	71	71	190
C6206Z	2021-12-11	Europe	Spain	41.573224	-5.692438	Crop	Pistaccia_vera_-Pistachio-	Mediterranean_forest	Mediterranean	Yes	Yes	Organic	12.5792	11.6083	40.5886	603.736	29.1	0.5	28.6	6.31667	20.3	20.3167	5.65	627	82	17	40.4609	228	72	74	225
C62076	2021-12-11	Europe	Spain	41.707363	-5.528158	Crop	Pistaccia_vera_-Pistachio-	Mediterranean_forest	Mediterranean	Yes	Yes	Organic	12.5083	11.6833	40.2874	617.87	29.4	0.4	29	6.11667	20.4667	20.4667	5.43333	563	71	17	36.8464	198	71	71	190
C6208W	2021-12-11	Europe	Spain	41.664483	-4.702097	Crop	Other	Mediterranean_forest	Mediterranean	No_data	No_data	No_data	12.5458	12.025	39.9502	645.665	30.2	0.1	30.1	5.71667	20.7667	20.8333	5.13333	424	50	17	32.7834	140	62	71	122
C6208Y	2021-12-11	Europe	Spain	41.664643	-4.70218	Crop	Other	Mediterranean_forest	Mediterranean	No_data	No_data	No_data	12.5458	12.025	39.9502	645.665	30.2	0.1	30.1	5.71667	20.7667	20.8333	5.13333	424	50	17	32.7834	140	62	71	122
C62070	2021-12-11	Europe	Spain	41.70749	-5.52863	Natural	Pasture	Mediterranean_forest	Mediterranean	No	No	No_data	12.5083	11.6833	40.2874	617.87	29.4	0.4	29	6.11667	20.4667	20.4667	5.43333	563	71	17	36.8464	198	71	71	190
C62071	2021-12-11	Europe	Spain	41.707234	-5.528598	Natural	Pasture	Mediterranean_forest	Mediterranean	No	No	No_data	12.5083	11.6833	40.2874	617.87	29.4	0.4	29	6.11667	20.4667	20.4667	5.43333	563	71	17	36.8464	198	71	71	190
C62072	2021-12-11	Europe	Spain	41.70713	-5.527729	Natural	Pasture	Mediterranean_forest	Mediterranean	No	No	No_data	12.5083	11.6833	40.2874	617.87	29.4	0.4	29	6.11667	20.4667	20.4667	5.43333	563	71	17	36.8464	198	71	71	190
C62075	2021-12-11	Europe	Spain	41.571795	-5.693382	Natural	Pasture	Mediterranean_forest	Mediterranean	No	No	No_data	12.5792	11.6083	40.5886	603.736	29.1	0.5	28.6	6.31667	20.3	20.3167	5.65	627	82	17	40.4609	228	72	74	225
C62077	2021-12-11	Europe	Spain	41.657609	-5.611811	Crop	Brassica_napus_-Rapeseed-	Mediterranean_forest	Mediterranean	Yes	Yes	Chemical	12.625	11.6667	40.3691	611.286	29.4	0.5	28.9	6.28333	20.4667	20.4667	5.61667	589	76	17	39.001	212	70	74	206
C62078	2021-12-11	Europe	Spain	41.709524	-5.527621	Crop	Vitis_vinifera_-Vine-	Mediterranean_forest	Mediterranean	No_data	No_data	No_data	12.525	11.6667	40.2299	617.718	29.4	0.4	29	6.11667	20.4667	20.4667	5.45	561	71	17	36.9499	198	70	70	190
C6202I	2021-12-12	Europe	Spain	37.93797	-4.295257	Crop	Olea_europea_-Olive-	Mediterranean_forest	Mediterranean	No	No	No_data	17.2083	13.3833	41.1795	678.246	35.9	3.4	32.5	10.15	25.9167	25.9167	9.45	495	79	4	58.4409	212	29	29	191
C6202J	2021-12-12	Europe	Spain	37.940435	-4.284824	Crop	Olea_europea_-Olive-	Mediterranean_forest	Mediterranean	No	No	No_data	17.2083	13.3833	41.1795	678.246	35.9	3.4	32.5	10.15	25.9167	25.9167	9.45	494	78	4	58.2299	211	29	29	190
C6202L	2021-12-12	Europe	Spain	37.953852	-4.462669	Crop	Olea_europea_-Olive-	Mediterranean_forest	Mediterranean	Yes	No	No_data	17.7875	13.5417	42.4504	655.46	35.8	3.9	31.9	10.95	26.0667	26.2333	10.2333	489	80	3	61.2548	216	26	30	191
C6202K	2021-12-12	Europe	Spain	37.966982	-4.269194	Crop	Olea_europea_-Olive-	Mediterranean_forest	Mediterranean	Yes	No	No_data	17.6083	13.45	41.6409	669.144	36	3.7	32.3	10.6167	26.15	26.1667	9.9	478	77	4	58.8018	206	28	31	185
C6202Y	2021-12-13	Europe	Spain	38.22818	-4.942549	Crop	Olea_europea_-Olive-	Mediterranean_forest	Mediterranean	No	No	No_data	14.5417	12.8667	40.0831	670.437	33.4	1.3	32.1	7.85	23.25	23.2833	7.01667	614	94	5	57.7678	258	35	36	236
C6202Z	2021-12-13	Europe	Spain	38.224917	-4.946067	Crop	Olea_europea_-Olive-	Mediterranean_forest	Mediterranean	No	No	No_data	14.325	12.8667	39.9586	673.959	33.3	1.1	32.2	7.61667	23.1	23.1333	6.8	631	96	5	57.2041	264	37	37	241
C6203H	2021-12-15	Europe	Spain	40.95591	-5.65478	Natural	Alnus_glutinosa_-Alder-	Mediterranean_forest	Mediterranean	No	No	No_data	12.3958	11.8417	40.1412	626.064	29.8	0.3	29.5	5.91667	20.4	20.4833	5.26667	530	66	14	38.6355	188	63	68	180
C6203M	2021-12-15	Europe	Spain	40.95478	-5.63322	Natural	Pinus_spp.	Mediterranean_forest	Mediterranean	No	No	No_data	12.3583	11.85	40.0338	624.244	29.8	0.2	29.6	5.86667	20.3167	20.4167	5.23333	504	63	14	37.9809	178	61	66	170
C6203I	2021-12-15	Europe	Spain	40.95418	-5.63964	Natural	Populus_spp._-Poplar-	Mediterranean_forest	Mediterranean	No	No	No_data	12.4	11.8167	40.0565	626.32	29.8	0.3	29.5	5.9	20.3833	20.4833	5.25	511	64	13	38.7467	181	61	65	173
C6202M	2021-12-15	Europe	Spain	38.010548	-4.52297	Crop	Olea_europea_-Olive-	Mediterranean_forest	Mediterranean	No	Yes	Organic	17.4833	13.0833	41.0136	662.37	35.7	3.8	31.9	10.6167	25.9333	26	9.88333	503	81	4	60.0708	219	27	31	194
C6202U	2021-12-15	Europe	Spain	38.033577	-4.520284	Crop	Olea_europea_-Olive-	Mediterranean_forest	Mediterranean	No_data	No_data	No_data	17.1667	13.1	40.9375	666.488	35.5	3.5	32	10.2833	25.7	25.7333	9.53333	509	81	4	59.2571	219	28	31	195
C6202X	2021-12-15	Europe	Spain	38.034227	-4.519485	Crop	Olea_europea_-Olive-	Mediterranean_forest	Mediterranean	No_data	No_data	No_data	17.1667	13.1	40.9375	666.488	35.5	3.5	32	10.2833	25.7	25.7333	9.53333	509	81	4	59.2571	219	28	31	195
C6202N	2021-12-15	Europe	Spain	38.088148	-4.2758	Crop	Olea_europea_-Olive-	Mediterranean_forest	Mediterranean	No	No	No_data	17.1083	12.9833	40.7001	670.637	35.5	3.6	31.9	10.2	25.7333	25.7333	9.46667	472	75	4	57.5208	200	29	31	180
C6202R	2021-12-15	Europe	Spain	38.095556	-4.309465	Crop	Olea_europea_-Olive-	Mediterranean_forest	Mediterranean	No	No	No_data	16.9792	13.125	40.8879	672.24	35.5	3.4	32.1	10.0667	25.6333	25.6333	9.33333	481	76	4	57.2581	203	30	31	183
C6202S	2021-12-15	Europe	Spain	38.079722	-4.333611	Crop	Olea_europea_-Olive-	Mediterranean_forest	Mediterranean	No	No	No_data	17.3042	13.2083	41.0197	671.584	35.8	3.6	32.2	10.35	25.9333	25.9333	9.61667	480	76	4	57.8489	204	29	29	183
C6202T	2021-12-15	Europe	Spain	38.090861	-4.302184	Crop	Olea_europea_-Olive-	Mediterranean_forest	Mediterranean	No	No	No_data	16.9625	13.125	40.6347	674.682	35.6	3.3	32.3	10	25.65	25.65	9.26667	483	76	4	56.8265	203	30	30	183
C6219P	2021-12-15	Europe	Spain	39.43216597	-2.84811634	Crop	Pistaccia_vera_-Pistachio-	Mediterranean_forest	Mediterranean	No_data	No_data	No_data	14.6708	13.4083	39.5526	732.882	34.4	0.5	33.9	10.1667	24.05	24.3167	6.45	421	55	8	42.4835	150	42	46	135
C6219Z	2021-12-15	Europe	Spain	39.55387268	-2.86443002	Crop	Pistaccia_vera_-Pistachio-	Mediterranean_forest	Mediterranean	No_data	No_data	No_data	14.1417	13.2333	39.3849	729.027	33.8	0.2	33.6	9.66667	23.5167	23.7667	6.01667	445	57	9	41.6905	157	45	50	142
C621AO	2021-12-15	Europe	Spain	39.43146906	-2.89776874	Crop	Pistaccia_vera_-Pistachio-	Mediterranean_forest	Mediterranean	No_data	No_data	No_data	14.6208	13.3417	39.3559	734.83	34.3	0.4	33.9	10.0833	24	24.2833	6.35	419	55	8	43.1405	150	41	45	136
C621AW	2021-12-15	Europe	Spain	39.46069839	-2.9299982	Crop	Pistaccia_vera_-Pistachio-	Mediterranean_forest	Mediterranean	No_data	No_data	No_data	14.7083	13.5	39.5894	734.893	34.5	0.4	34.1	10.2167	24.1333	24.3833	6.48333	414	55	8	42.931	150	41	45	134
C621B2	2021-12-15	Europe	Spain	39.6155623	-2.80710531	Crop	Pistaccia_vera_-Pistachio-	Mediterranean_forest	Mediterranean	No_data	No_data	No_data	13.95	13.15	39.3713	725.381	33.5	0.1	33.4	9.53333	23.3167	23.5167	5.86667	451	57	9	41.8565	158	46	50	142
C621B3	2021-12-15	Europe	Spain	39.48177019	-2.87792146	Crop	Pistaccia_vera_-Pistachio-	Mediterranean_forest	Mediterranean	No_data	No_data	No_data	14.4958	13.3417	39.3559	734.294	34.2	0.3	33.9	10.0167	23.9167	24.1667	6.28333	430	56	8	42.8305	154	42	46	139
C621B4	2021-12-15	Europe	Spain	39.51763816	-2.90228759	Crop	Pistaccia_vera_-Pistachio-	Mediterranean_forest	Mediterranean	No_data	No_data	No_data	14.2625	13.225	39.2433	730.893	33.9	0.2	33.7	9.8	23.65	23.9	6.1	446	57	9	41.8295	158	45	49	142
C6219I	2021-12-15	Europe	Spain	39.55672912	-3.44527997	Crop	Pistaccia_vera_-Pistachio-	Mediterranean_forest	Mediterranean	No_data	No_data	No_data	14.5292	12.9083	38.3037	736.239	34.2	0.5	33.7	10.0167	24.0167	24.2333	6.3	403	53	8	41.7293	145	42	46	128
C6219J	2021-12-15	Europe	Spain	39.57077543	-3.31379255	Crop	Pistaccia_vera_-Pistachio-	Mediterranean_forest	Mediterranean	No_data	No_data	No_data	14.7042	13.0083	38.7153	730.661	34.2	0.6	33.6	10.1833	24.0667	24.3167	6.5	403	53	8	42.3262	145	41	45	128
C6219K	2021-12-15	Europe	Spain	39.527041	-3.333385	Crop	Pistaccia_vera_-Pistachio-	Mediterranean_forest	Mediterranean	No_data	No_data	No_data	14.7292	13.1917	39.0286	733.65	34.4	0.6	33.8	10.1833	24.1333	24.3833	6.5	408	53	8	42.0266	146	41	46	129
C6219N	2021-12-15	Europe	Spain	39.5827243	-3.37859903	Crop	Pistaccia_vera_-Pistachio-	Mediterranean_forest	Mediterranean	No_data	No_data	No_data	14.5958	12.9583	38.452	735.38	34.3	0.6	33.7	10.0667	24.0667	24.2833	6.36667	401	53	8	42.477	145	41	44	128
C6219O	2021-12-15	Europe	Spain	39.57622231	-3.37502211	Crop	Pistaccia_vera_-Pistachio-	Mediterranean_forest	Mediterranean	No_data	No_data	No_data	14.5958	12.9583	38.452	735.38	34.3	0.6	33.7	10.0667	24.0667	24.2833	6.36667	401	53	8	42.477	145	41	44	128
C6219R	2021-12-15	Europe	Spain	39.56370548	-3.42115392	Crop	Pistaccia_vera_-Pistachio-	Mediterranean_forest	Mediterranean	No_data	No_data	No_data	14.6	12.95	38.4273	736.805	34.3	0.6	33.7	10.05	24.0833	24.3167	6.36667	400	53	8	42.0125	143	41	45	128
C6219U	2021-12-15	Europe	Spain	39.56169881	-3.38631573	Crop	Pistaccia_vera_-Pistachio-	Mediterranean_forest	Mediterranean	No_data	No_data	No_data	14.6583	13.05	38.6095	736.157	34.4	0.6	33.8	10.1333	24.1333	24.3667	6.41667	398	53	8	42.282	144	41	44	127
C6219W	2021-12-15	Europe	Spain	39.59245492	-3.36248281	Crop	Pistaccia_vera_-Pistachio-	Mediterranean_forest	Mediterranean	No_data	No_data	No_data	14.55	12.8667	38.408	734.011	34.1	0.6	33.5	10.0333	24	24.2167	6.33333	406	53	8	42.5077	147	41	45	129
C6219X	2021-12-15	Europe	Spain	39.54045547	-3.39798807	Crop	Pistaccia_vera_-Pistachio-	Mediterranean_forest	Mediterranean	No_data	No_data	No_data	14.6958	13.125	38.7168	736.378	34.5	0.6	33.9	10.1667	24.1667	24.4	6.45	400	53	8	41.7363	143	41	45	128
C6219Y	2021-12-15	Europe	Spain	39.56741002	-3.35097778	Crop	Pistaccia_vera_-Pistachio-	Mediterranean_forest	Mediterranean	No_data	No_data	No_data	14.6292	12.975	38.6161	734.647	34.2	0.6	33.6	10.1	24.0667	24.3	6.4	403	53	8	42.3262	145	41	45	128
C621A0	2021-12-15	Europe	Spain	39.57743235	-3.37314106	Crop	Pistaccia_vera_-Pistachio-	Mediterranean_forest	Mediterranean	No_data	No_data	No_data	14.5708	12.925	38.4673	734.486	34.2	0.6	33.6	10.0333	24.0167	24.25	6.35	404	53	8	42.258	145	41	45	129
C621A1	2021-12-15	Europe	Spain	39.63438837	-3.30418394	Crop	Pistaccia_vera_-Pistachio-	Mediterranean_forest	Mediterranean	No_data	No_data	No_data	14.5958	13.025	38.7649	732.23	34.1	0.5	33.6	10.0833	23.9833	24.2167	6.36667	405	53	8	42.4022	146	41	45	129
C621A2	2021-12-15	Europe	Spain	39.57887359	-3.37110201	Crop	Pistaccia_vera_-Pistachio-	Mediterranean_forest	Mediterranean	No_data	No_data	No_data	14.5708	12.925	38.4673	734.486	34.2	0.6	33.6	10.0333	24.0167	24.25	6.35	404	53	8	42.258	145	41	45	129
C621A4	2021-12-15	Europe	Spain	39.60494323	-3.26625205	Crop	Pistaccia_vera_-Pistachio-	Mediterranean_forest	Mediterranean	No_data	No_data	No_data	14.6833	13.1833	39.0039	732.217	34.3	0.5	33.8	10.15	24.05	24.3	6.43333	401	53	8	42.6393	145	41	44	129
C621A5	2021-12-15	Europe	Spain	39.62708861	-3.40906871	Crop	Pistaccia_vera_-Pistachio-	Mediterranean_forest	Mediterranean	No_data	No_data	No_data	14.5667	12.65	37.988	733.997	34	0.7	33.3	10.0667	24.0167	24.2167	6.35	402	53	8	42.6267	146	41	44	128
C621A6	2021-12-15	Europe	Spain	39.55374602	-3.3351018	Crop	Pistaccia_vera_-Pistachio-	Mediterranean_forest	Mediterranean	No_data	No_data	No_data	14.6958	13.0917	38.8477	732.59	34.3	0.6	33.7	10.1667	24.1	24.3333	6.48333	408	53	8	42.0266	145	41	45	129
C621A7	2021-12-15	Europe	Spain	39.58647508	-3.34922288	Crop	Pistaccia_vera_-Pistachio-	Mediterranean_forest	Mediterranean	No_data	No_data	No_data	14.65	12.8667	38.408	732.607	34.2	0.7	33.5	10.1333	24.0667	24.3	6.45	403	53	8	42.2543	146	41	45	129
C621A8	2021-12-15	Europe	Spain	39.56212	-3.34699	Crop	Pistaccia_vera_-Pistachio-	Mediterranean_forest	Mediterranean	No_data	No_data	No_data	14.6625	13.0083	38.6004	734.334	34.3	0.6	33.7	10.1167	24.1	24.3333	6.43333	401	53	8	42.4589	144	41	44	128
C621AA	2021-12-15	Europe	Spain	39.53150806	-3.40729053	Crop	Pistaccia_vera_-Pistachio-	Mediterranean_forest	Mediterranean	No_data	No_data	No_data	14.675	13.1	38.7574	736.131	34.4	0.6	33.8	10.1167	24.1333	24.3833	6.43333	407	53	8	42.2763	146	41	45	129
C621AB	2021-12-15	Europe	Spain	39.57588643	-3.38656209	Crop	Pistaccia_vera_-Pistachio-	Mediterranean_forest	Mediterranean	No_data	No_data	No_data	14.5833	12.95	38.4273	735.571	34.3	0.6	33.7	10.05	24.05	24.2667	6.35	401	53	8	42.1505	144	41	45	128
C621AC	2021-12-15	Europe	Spain	39.55263276	-3.41535415	Crop	Pistaccia_vera_-Pistachio-	Mediterranean_forest	Mediterranean	No_data	No_data	No_data	14.6042	12.975	38.5015	735.535	34.3	0.6	33.7	10.0833	24.0833	24.3	6.38333	404	53	8	41.8081	145	42	46	128
C621AD	2021-12-15	Europe	Spain	39.56826171	-3.34862905	Crop	Pistaccia_vera_-Pistachio-	Mediterranean_forest	Mediterranean	No_data	No_data	No_data	14.6375	12.9583	38.5665	734.986	34.2	0.6	33.6	10.1167	24.0833	24.3167	6.4	403	53	8	42.3262	145	41	45	128
C621AF	2021-12-15	Europe	Spain	39.57158934	-3.38298915	Crop	Pistaccia_vera_-Pistachio-	Mediterranean_forest	Mediterranean	No_data	No_data	No_data	14.6333	13.0167	38.6251	735.615	34.3	0.6	33.7	10.1	24.0833	24.3333	6.4	400	53	8	42.0859	144	41	44	128
C621AG	2021-12-15	Europe	Spain	39.55076538	-3.3368011	Crop	Pistaccia_vera_-Pistachio-	Mediterranean_forest	Mediterranean	No_data	No_data	No_data	14.6958	13.0917	38.8477	732.59	34.3	0.6	33.7	10.1667	24.1	24.3333	6.48333	408	53	8	42.0266	145	41	45	129
C621AH	2021-12-15	Europe	Spain	39.53997084	-3.32903194	Crop	Pistaccia_vera_-Pistachio-	Mediterranean_forest	Mediterranean	No_data	No_data	No_data	14.7083	13.1833	39.1197	731.325	34.3	0.6	33.7	10.1833	24.0833	24.3333	6.5	407	53	8	41.8509	145	42	45	129
C621AI	2021-12-15	Europe	Spain	39.61587	-3.32208	Crop	Pistaccia_vera_-Pistachio-	Mediterranean_forest	Mediterranean	No_data	No_data	No_data	14.6792	12.875	38.5479	732.013	34.1	0.7	33.4	10.15	24.0667	24.3	6.46667	399	53	8	42.7502	144	40	44	127
C621AJ	2021-12-15	Europe	Spain	39.63279777	-3.3003041	Crop	Pistaccia_vera_-Pistachio-	Mediterranean_forest	Mediterranean	No_data	No_data	No_data	14.6125	12.9917	38.7811	731.229	34.1	0.6	33.5	10.1	23.9833	24.2167	6.38333	403	53	8	42.559	146	41	44	129
C621AK	2021-12-15	Europe	Spain	39.66358809	-3.37309085	Crop	Pistaccia_vera_-Pistachio-	Mediterranean_forest	Mediterranean	No_data	No_data	No_data	14.4292	12.7083	38.1632	732.655	33.9	0.6	33.3	9.93333	23.8667	24.0667	6.23333	416	54	8	41.9512	150	43	46	131
C621AL	2021-12-15	Europe	Spain	39.61447052	-3.44088659	Crop	Pistaccia_vera_-Pistachio-	Mediterranean_forest	Mediterranean	No_data	No_data	No_data	14.5167	12.75	38.0597	734.396	34.1	0.6	33.5	10.0333	23.9833	24.1833	6.3	406	53	8	42.1892	146	41	45	129
C621AN	2021-12-15	Europe	Spain	39.5574322	-3.44138477	Crop	Pistaccia_vera_-Pistachio-	Mediterranean_forest	Mediterranean	No_data	No_data	No_data	14.525	12.8833	38.2295	735.519	34.2	0.5	33.7	10.0167	24.0167	24.2167	6.31667	402	53	8	41.6296	144	42	46	128
C621AP	2021-12-15	Europe	Spain	39.58051459	-3.37299801	Crop	Pistaccia_vera_-Pistachio-	Mediterranean_forest	Mediterranean	No_data	No_data	No_data	14.5708	12.925	38.4673	734.486	34.2	0.6	33.6	10.0333	24.0167	24.25	6.35	404	53	8	42.258	145	41	45	129
C621AQ	2021-12-15	Europe	Spain	39.58884397	-3.44035548	Crop	Pistaccia_vera_-Pistachio-	Mediterranean_forest	Mediterranean	No_data	No_data	No_data	14.4792	12.825	38.2836	734.963	34.1	0.6	33.5	9.98333	23.95	24.1667	6.26667	407	53	8	41.6902	146	42	46	129
C621AR	2021-12-15	Europe	Spain	39.58854312	-3.44392998	Crop	Pistaccia_vera_-Pistachio-	Mediterranean_forest	Mediterranean	No_data	No_data	No_data	14.325	12.8167	38.1448	735.522	34	0.4	33.6	9.81667	23.8167	24.0167	6.11667	418	54	8	41.6457	149	43	47	132
C621AT	2021-12-15	Europe	Spain	39.67749796	-3.39766485	Crop	Pistaccia_vera_-Pistachio-	Mediterranean_forest	Mediterranean	No_data	No_data	No_data	14.3875	12.7083	38.0489	734.284	33.9	0.5	33.4	9.88333	23.8167	24.0333	6.13333	417	53	8	41.6112	149	43	46	130
C621AV	2021-12-15	Europe	Spain	39.55782	-3.38485	Crop	Pistaccia_vera_-Pistachio-	Mediterranean_forest	Mediterranean	No_data	No_data	No_data	14.7	13.1	38.7574	735.508	34.4	0.6	33.8	10.1667	24.15	24.3833	6.45	396	53	8	42.0645	143	41	44	127
C621AX	2021-12-15	Europe	Spain	39.527058	-3.333315	Crop	Pistaccia_vera_-Pistachio-	Mediterranean_forest	Mediterranean	No_data	No_data	No_data	14.7083	13.1833	39.1197	730.771	34.3	0.6	33.7	10.1833	24.0667	24.3167	6.5	403	53	8	42.3262	145	41	45	128
C621AY	2021-12-15	Europe	Spain	39.63458474	-3.30228194	Crop	Pistaccia_vera_-Pistachio-	Mediterranean_forest	Mediterranean	No_data	No_data	No_data	14.5958	13.025	38.7649	732.23	34.1	0.5	33.6	10.0833	23.9833	24.2167	6.36667	405	53	8	42.4022	146	41	45	129
C621AZ	2021-12-15	Europe	Spain	39.527033	-3.333398	Crop	Pistaccia_vera_-Pistachio-	Mediterranean_forest	Mediterranean	No_data	No_data	No_data	14.7292	13.1917	39.0286	733.65	34.4	0.6	33.8	10.1833	24.1333	24.3833	6.5	408	53	8	42.0266	146	41	46	129
C621B0	2021-12-15	Europe	Spain	39.62937043	-3.34965149	Crop	Pistaccia_vera_-Pistachio-	Mediterranean_forest	Mediterranean	No_data	No_data	No_data	14.5167	12.6833	38.2028	731.568	33.9	0.7	33.2	10.0167	23.9333	24.15	6.33333	413	54	8	42.6422	149	42	45	130
C621B1	2021-12-15	Europe	Spain	39.61608	-3.44087	Crop	Pistaccia_vera_-Pistachio-	Mediterranean_forest	Mediterranean	No_data	No_data	No_data	14.5167	12.75	38.0597	734.396	34.1	0.6	33.5	10.0333	23.9833	24.1833	6.3	406	53	8	42.1892	146	41	45	129
C621B5	2021-12-15	Europe	Spain	39.5528846	-3.33513202	Crop	Pistaccia_vera_-Pistachio-	Mediterranean_forest	Mediterranean	No_data	No_data	No_data	14.6958	13.0917	38.8477	732.59	34.3	0.6	33.7	10.1667	24.1	24.3333	6.48333	408	53	8	42.0266	145	41	45	129
C6205L	2021-12-15	Europe	Spain	41.43311	-4.97021	Crop	Vitis_vinifera_-Vine-	Mediterranean_forest	Mediterranean	No_data	No_data	No_data	12.2875	11.8917	40.3107	627.423	29.5	0	29.5	5.65	20.25	20.3	5.03333	428	50	16	32.3393	140	64	68	126
C6205S	2021-12-15	Europe	Spain	41.43348	-4.966637	Crop	Vitis_vinifera_-Vine-	Mediterranean_forest	Mediterranean	No_data	No_data	No_data	12.275	11.8833	40.2825	627.772	29.5	0	29.5	5.63333	20.2333	20.3	5.01667	427	50	16	31.8661	140	64	69	126
C6206E	2021-12-15	Europe	Spain	41.434888	-4.968976	Crop	Vitis_vinifera_-Vine-	Mediterranean_forest	Mediterranean	No_data	No_data	No_data	12.2917	11.8833	40.2825	626.596	29.5	0	29.5	5.66667	20.2333	20.3	5.05	427	50	16	32.5202	140	63	68	126
C6206V	2021-12-15	Europe	Spain	41.431847	-4.966519	Crop	Vitis_vinifera_-Vine-	Mediterranean_forest	Mediterranean	No_data	No_data	No_data	12.2208	11.875	40.2542	628.054	29.4	-0.1	29.5	5.58333	20.2	20.2333	4.96667	430	50	16	31.9527	140	65	69	126
C62073	2021-12-15	Europe	Spain	41.431573	-4.96462	Crop	Vitis_vinifera_-Vine-	Mediterranean_forest	Mediterranean	No_data	No_data	No_data	12.2208	11.875	40.2542	628.054	29.4	-0.1	29.5	5.58333	20.2	20.2333	4.96667	430	50	16	31.9527	140	65	69	126
C6207A	2021-12-15	Europe	Spain	41.430246	-4.963858	Crop	Vitis_vinifera_-Vine-	Mediterranean_forest	Mediterranean	No_data	No_data	No_data	12.2208	11.875	40.2542	628.054	29.4	-0.1	29.5	5.58333	20.2	20.2333	4.96667	430	50	16	31.9527	140	65	69	126
C6207G	2021-12-15	Europe	Spain	41.431742	-4.960028	Crop	Vitis_vinifera_-Vine-	Mediterranean_forest	Mediterranean	No_data	No_data	No_data	12.2208	11.875	40.2542	628.054	29.4	-0.1	29.5	5.58333	20.2	20.2333	4.96667	430	50	16	31.9527	140	65	69	126
C6208U	2021-12-15	Europe	Spain	41.431275	-4.958901	Crop	Vitis_vinifera_-Vine-	Mediterranean_forest	Mediterranean	No_data	No_data	No_data	12.2208	11.875	40.2542	628.054	29.4	-0.1	29.5	5.58333	20.2	20.2333	4.96667	430	50	16	31.9527	140	65	69	126
C6202E	2021-12-16	Europe	Spain	38.024537	-4.534098	Crop	Olea_europea_-Olive-	Mediterranean_forest	Mediterranean	No_data	No_data	No_data	17.2292	13.0083	40.9067	662.751	35.4	3.6	31.8	10.3833	25.7	25.75	9.63333	509	81	4	59.4034	219	28	31	195
C6202F	2021-12-16	Europe	Spain	38.024849	-4.533376	Crop	Olea_europea_-Olive-	Mediterranean_forest	Mediterranean	No_data	No_data	No_data	17.2292	13.0083	40.9067	662.751	35.4	3.6	31.8	10.3833	25.7	25.75	9.63333	509	81	4	59.4034	219	28	31	195
C6219M	2021-12-16	Europe	Spain	39.709786	-3.451865	Crop	Pistaccia_vera_-Pistachio-	Mediterranean_forest	Mediterranean	No_data	No_data	No_data	14.5833	12.8667	38.2937	731.292	34.1	0.5	33.6	10.1333	23.9833	24.1833	6.35	396	52	8	42.3812	145	41	44	126
C6201K	2021-12-17	Europe	Spain	37.235495	-4.2679917	Crop	Olea_europea_-Olive-	Mediterranean_forest	Mediterranean	No_data	No_data	No_data	16.0958	12.9917	42.0442	631.497	34	3.1	30.9	9.86667	24.2	24.3833	9	532	83	3	60.7125	231	25	28	216
C6201V	2021-12-17	Europe	Spain	37.234241	-4.2677399	Crop	Olea_europea_-Olive-	Mediterranean_forest	Mediterranean	No_data	No_data	No_data	16.0958	12.9917	42.0442	631.497	34	3.1	30.9	9.86667	24.2	24.3833	9	532	83	3	60.7125	231	25	28	216
C6209B	2021-12-17	Europe	Spain	37.4784328	-4.1878382	Crop	Olea_europea_-Olive-	Mediterranean_forest	Mediterranean	No_data	No_data	No_data	16.1083	13.4333	41.8484	656.82	34.7	2.6	32.1	9.53333	24.6	24.65	8.71667	516	79	3	57.7648	217	27	31	201
C6209M	2021-12-17	Europe	Spain	37.4783894	-4.1870751	Crop	Olea_europea_-Olive-	Mediterranean_forest	Mediterranean	No_data	No_data	No_data	16.1083	13.4333	41.8484	656.82	34.7	2.6	32.1	9.53333	24.6	24.65	8.71667	516	79	3	57.7648	217	27	31	201
C620FI	2021-12-18	Europe	Spain	41.050956	-5.6775736	Crop	Triticum_aestivum_-Wheat-	Mediterranean_forest	Mediterranean	No_data	No_data	No_data	12.0125	11.825	40.4966	617.356	29.2	0	29.2	5.63333	19.9333	19.95	4.96667	565	72	15	39.3248	203	66	71	197
C620JL	2021-12-18	Europe	Spain	41.050956	-5.6775736	Crop	Malus_domestica_-Apple-	Mediterranean_forest	Mediterranean	Yes	Yes	Organic	12.0125	11.825	40.4966	617.356	29.2	0	29.2	5.63333	19.9333	19.95	4.96667	565	72	15	39.3248	203	66	71	197
C620JH	2021-12-18	Europe	Spain	41.050956	-5.6775736	Crop	Prunus_cerasus_-Cherry-	Mediterranean_forest	Mediterranean	Yes	Yes	Organic	12.0125	11.825	40.4966	617.356	29.2	0	29.2	5.63333	19.9333	19.95	4.96667	565	72	15	39.3248	203	66	71	197
C620JJ	2021-12-18	Europe	Spain	41.050956	-5.6775736	Crop	Prunus_domestica_-Plum-	Mediterranean_forest	Mediterranean	Yes	Yes	Organic	12.0125	11.825	40.4966	617.356	29.2	0	29.2	5.63333	19.9333	19.95	4.96667	565	72	15	39.3248	203	66	71	197
C620FJ	2021-12-18	Europe	Spain	41.050956	-5.6775736	Crop	Prunus_persica_-Peach-	Mediterranean_forest	Mediterranean	No_data	No_data	No_data	12.0125	11.825	40.4966	617.356	29.2	0	29.2	5.63333	19.9333	19.95	4.96667	565	72	15	39.3248	203	66	71	197
C620JI	2021-12-18	Europe	Spain	41.050956	-5.6775736	Crop	Prunus_persica_-Peach-	Mediterranean_forest	Mediterranean	Yes	Yes	Organic	12.0125	11.825	40.4966	617.356	29.2	0	29.2	5.63333	19.9333	19.95	4.96667	565	72	15	39.3248	203	66	71	197
C620JG	2021-12-18	Europe	Spain	41.050956	-5.6775736	Crop	Pyrus_communis_-Pear-	Mediterranean_forest	Mediterranean	Yes	Yes	Organic	12.0125	11.825	40.4966	617.356	29.2	0	29.2	5.63333	19.9333	19.95	4.96667	565	72	15	39.3248	203	66	71	197
C620JK	2021-12-18	Europe	Spain	41.050956	-5.6775736	Crop	Juglans_regia_-Walnut-	Mediterranean_forest	Mediterranean	Yes	Yes	Organic	12.0125	11.825	40.4966	617.356	29.2	0	29.2	5.63333	19.9333	19.95	4.96667	565	72	15	39.3248	203	66	71	197
C6219Q	2021-12-18	Europe	Spain	39.679653	-3.437102	Crop	Pistaccia_vera_-Pistachio-	Mediterranean_forest	Mediterranean	No_data	No_data	No_data	14.6458	12.8917	38.3681	732.596	34.2	0.6	33.6	10.15	24.05	24.25	6.4	395	52	8	42.1765	143	41	44	126
C620JM	2021-12-18	Europe	Spain	41.050956	-5.6775736	Crop	Prunus_dulcis_-Almond-	Mediterranean_forest	Mediterranean	Yes	Yes	Organic	12.0125	11.825	40.4966	617.356	29.2	0	29.2	5.63333	19.9333	19.95	4.96667	565	72	15	39.3248	203	66	71	197
C620JN	2021-12-18	Europe	Spain	41.050956	-5.6775736	Crop	Prunus_dulcis_-Almond-	Mediterranean_forest	Mediterranean	Yes	Yes	Organic	12.0125	11.825	40.4966	617.356	29.2	0	29.2	5.63333	19.9333	19.95	4.96667	565	72	15	39.3248	203	66	71	197
C6203N	2021-12-18	Europe	Spain	41.0515944	-5.6547105	Crop	Brassica_oleracea_-Cabbage-	Mediterranean_forest	Mediterranean	No_data	No_data	No_data	12.0583	11.9833	40.6215	621.932	29.5	0	29.5	5.63333	20.05	20.05	4.96667	541	69	14	39.0537	194	64	64	187
C620KL	2021-12-19	Europe	Spain	40.95591	-5.65478	Natural	Alnus_glutinosa_-Alder-	Mediterranean_forest	Mediterranean	No	No	No_data	12.3958	11.8417	40.1412	626.064	29.8	0.3	29.5	5.91667	20.4	20.4833	5.26667	530	66	14	38.6355	188	63	68	180
C620KM	2021-12-19	Europe	Spain	40.95478	-5.63322	Natural	Pinus_sylvestris	Mediterranean_forest	Mediterranean	No	No	No_data	12.3583	11.85	40.0338	624.244	29.8	0.2	29.6	5.86667	20.3167	20.4167	5.23333	504	63	14	37.9809	178	61	66	170
C620KN	2021-12-19	Europe	Spain	40.95478	-5.63322	Natural	Pinus_sylvestris	Mediterranean_forest	Mediterranean	No	No	No_data	12.3583	11.85	40.0338	624.244	29.8	0.2	29.6	5.86667	20.3167	20.4167	5.23333	504	63	14	37.9809	178	61	66	170
C620JO	2021-12-19	Europe	Spain	40.54862	-6.14191	Natural	Pinus_sylvestris	Mediterranean_forest	Mediterranean	No	No	No_data	10.6167	8.88333	36.4071	563.832	24.7	0.3	24.4	5.3	18.0833	18.0833	4.36667	1040	155	16	53.5235	423	77	77	421
C620KO	2021-12-19	Europe	Spain	40.95418	-5.63964	Natural	Populus_spp._-Poplar-	Mediterranean_forest	Mediterranean	No	No	No_data	12.4	11.8167	40.0565	626.32	29.8	0.3	29.5	5.9	20.3833	20.4833	5.25	511	64	13	38.7467	181	61	65	173
C620KP	2021-12-19	Europe	Spain	40.95418	-5.63964	Natural	Populus_spp._-Poplar-	Mediterranean_forest	Mediterranean	No	No	No_data	12.4	11.8167	40.0565	626.32	29.8	0.3	29.5	5.9	20.3833	20.4833	5.25	511	64	13	38.7467	181	61	65	173
C620JP	2021-12-19	Europe	Spain	40.54862	-6.14191	Natural	Quercus_pyrenaica_-Oak-	Mediterranean_forest	Mediterranean	No	No	No_data	10.6167	8.88333	36.4071	563.832	24.7	0.3	24.4	5.3	18.0833	18.0833	4.36667	1040	155	16	53.5235	423	77	77	421
C620KK	2021-12-19	Europe	Spain	40.54862	-6.14191	Natural	Quercus_pyrenaica_-Oak-	Mediterranean_forest	Mediterranean	No	No	No_data	10.6167	8.88333	36.4071	563.832	24.7	0.3	24.4	5.3	18.0833	18.0833	4.36667	1040	155	16	53.5235	423	77	77	421
C6209J	2021-12-19	Europe	Spain	37.8375996	-5.0626554	Crop	Olea_europea_-Olive-	Mediterranean_forest	Mediterranean	No_data	No_data	No_data	17.1458	12.5583	41.5839	621.43	34.4	4.2	30.2	10.8667	25	25.2	10.0167	541	91	3	64.3618	247	23	29	218
C6209E	2021-12-19	Europe	Spain	37.8086934	-5.0851672	Crop	Olea_europea_-Olive-	Mediterranean_forest	Mediterranean	No_data	No_data	No_data	17.5125	12.8583	42.4367	617.293	34.7	4.4	30.3	11.2	25.2833	25.4833	10.3833	527	90	3	64.7797	242	23	28	212
C6219S	2021-12-19	Europe	Spain	39.583481	-3.364487	Crop	Pistaccia_vera_-Pistachio-	Mediterranean_forest	Mediterranean	No_data	No_data	No_data	14.5958	12.875	38.3185	734.932	34.2	0.6	33.6	10.0667	24.05	24.2833	6.38333	403	53	8	41.8929	145	41	45	129
C620B4	2021-12-19	Europe	Spain	36.79365	-2.71943	Crop	Solanum_lycopersicum_-Tomato-	Mediterranean_forest	Mediterranean	No_data	No_data	No_data	17.4458	10.8417	41.6987	545.996	31.7	5.7	26	12.2	24.3667	24.6167	11.3167	307	42	2	54.8062	121	16	19	110
C620W8	2021-12-20	Europe	Spain	36.849682	-2.33367	Crop	Olea_europea_-Olive-	Mediterranean_forest	Mediterranean	No_data	No_data	No_data	17.8542	10.9417	41.9221	544.875	32.1	6	26.1	15.25	24.7167	25.0167	11.7	210	30	1	52.0258	83	13	16	71
C620WB	2021-12-20	Europe	Spain	36.857157	-2.488123	Crop	Olea_europea_-Olive-	Mediterranean_forest	Mediterranean	No_data	No_data	No_data	17.3042	10.925	40.9176	569.687	32.1	5.4	26.7	14.4667	24.5667	24.7667	10.9167	256	33	2	51.5971	98	16	18	90
C620WT	2021-12-20	Europe	Spain	36.857147	-2.488118	Crop	Olea_europea_-Olive-	Mediterranean_forest	Mediterranean	No_data	No_data	No_data	17.3042	10.925	40.9176	569.687	32.1	5.4	26.7	14.4667	24.5667	24.7667	10.9167	256	33	2	51.5971	98	16	18	90
C621ID	2021-12-20	Europe	Spain	36.961847	-2.400125	Crop	Olea_europea_-Olive-	Mediterranean_forest	Mediterranean	No_data	No_data	No_data	15.95	12.1333	41.6953	614.876	32.4	3.3	29.1	9.95	23.9167	23.9667	9.08333	310	39	3	49.5382	115	21	23	107
C621IO	2021-12-20	Europe	Spain	36.857127	-2.48812	Crop	Olea_europea_-Olive-	Mediterranean_forest	Mediterranean	No_data	No_data	No_data	17.3042	10.925	40.9176	569.687	32.1	5.4	26.7	14.4667	24.5667	24.7667	10.9167	256	33	2	51.5971	98	16	18	90
C621IQ	2021-12-20	Europe	Spain	36.849674	-2.33363	Crop	Olea_europea_-Olive-	Mediterranean_forest	Mediterranean	No_data	No_data	No_data	17.8542	10.9417	41.9221	544.875	32.1	6	26.1	15.25	24.7167	25.0167	11.7	210	30	1	52.0258	83	13	16	71
C621JA	2021-12-20	Europe	Spain	36.961851	-2.400127	Crop	Olea_europea_-Olive-	Mediterranean_forest	Mediterranean	No_data	No_data	No_data	15.95	12.1333	41.6953	614.876	32.4	3.3	29.1	9.95	23.9167	23.9667	9.08333	310	39	3	49.5382	115	21	23	107
C621JB	2021-12-20	Europe	Spain	36.849688	-2.33374	Crop	Olea_europea_-Olive-	Mediterranean_forest	Mediterranean	No_data	No_data	No_data	17.8542	10.9417	41.9221	544.875	32.1	6	26.1	15.25	24.7167	25.0167	11.7	210	30	1	52.0258	83	13	16	71
C621JI	2021-12-20	Europe	Spain	36.961851	-2.400132	Crop	Olea_europea_-Olive-	Mediterranean_forest	Mediterranean	No_data	No_data	No_data	15.95	12.1333	41.6953	614.876	32.4	3.3	29.1	9.95	23.9167	23.9667	9.08333	310	39	3	49.5382	115	21	23	107
C6219T	2021-12-20	Europe	Spain	39.595602	-3.216579	Crop	Pistaccia_vera_-Pistachio-	Mediterranean_forest	Mediterranean	No_data	No_data	No_data	14.6625	13.1417	38.8807	733.259	34.3	0.5	33.8	10.1167	24.05	24.3	6.43333	404	53	8	42.65	146	41	44	129
C620B5	2021-12-20	Europe	Spain	36.79365	-2.71944	Crop	Solanum_lycopersicum_-Tomato-	Mediterranean_forest	Mediterranean	No_data	No_data	No_data	17.4458	10.8417	41.6987	545.996	31.7	5.7	26	12.2	24.3667	24.6167	11.3167	307	42	2	54.8062	121	16	19	110
C620B6	2021-12-20	Europe	Spain	36.79365	-2.71945	Crop	Solanum_lycopersicum_-Tomato-	Mediterranean_forest	Mediterranean	No_data	No_data	No_data	17.4458	10.8417	41.6987	545.996	31.7	5.7	26	12.2	24.3667	24.6167	11.3167	307	42	2	54.8062	121	16	19	110
C620B7	2021-12-20	Europe	Spain	36.79365	-2.71946	Crop	Solanum_lycopersicum_-Tomato-	Mediterranean_forest	Mediterranean	No_data	No_data	No_data	17.4458	10.8417	41.6987	545.996	31.7	5.7	26	12.2	24.3667	24.6167	11.3167	307	42	2	54.8062	121	16	19	110
C620B8	2021-12-20	Europe	Spain	36.79365	-2.71947	Crop	Solanum_lycopersicum_-Tomato-	Mediterranean_forest	Mediterranean	No_data	No_data	No_data	17.4458	10.8417	41.6987	545.996	31.7	5.7	26	12.2	24.3667	24.6167	11.3167	307	42	2	54.8062	121	16	19	110
C620B9	2021-12-20	Europe	Spain	36.79365	-2.71948	Crop	Solanum_lycopersicum_-Tomato-	Mediterranean_forest	Mediterranean	No_data	No_data	No_data	17.4458	10.8417	41.6987	545.996	31.7	5.7	26	12.2	24.3667	24.6167	11.3167	307	42	2	54.8062	121	16	19	110
C620BS	2021-12-20	Europe	Spain	36.79365	-2.7195	Crop	Solanum_lycopersicum_-Tomato-	Mediterranean_forest	Mediterranean	No_data	No_data	No_data	17.4458	10.8417	41.6987	545.996	31.7	5.7	26	12.2	24.3667	24.6167	11.3167	307	42	2	54.8062	121	16	19	110
C620BT	2021-12-20	Europe	Spain	36.79365	-2.71951	Crop	Solanum_lycopersicum_-Tomato-	Mediterranean_forest	Mediterranean	No_data	No_data	No_data	17.4458	10.8417	41.6987	545.996	31.7	5.7	26	12.2	24.3667	24.6167	11.3167	307	42	2	54.8062	121	16	19	110
C620BU	2021-12-20	Europe	Spain	36.79365	-2.71952	Crop	Solanum_lycopersicum_-Tomato-	Mediterranean_forest	Mediterranean	No_data	No_data	No_data	17.4458	10.8417	41.6987	545.996	31.7	5.7	26	12.2	24.3667	24.6167	11.3167	307	42	2	54.8062	121	16	19	110
C620BV	2021-12-20	Europe	Spain	36.79365	-2.71953	Crop	Solanum_lycopersicum_-Tomato-	Mediterranean_forest	Mediterranean	No_data	No_data	No_data	17.4458	10.8417	41.6987	545.996	31.7	5.7	26	12.2	24.3667	24.6167	11.3167	307	42	2	54.8062	121	16	19	110
C620BW	2021-12-20	Europe	Spain	36.79365	-2.71954	Crop	Solanum_lycopersicum_-Tomato-	Mediterranean_forest	Mediterranean	No_data	No_data	No_data	17.4458	10.8417	41.6987	545.996	31.7	5.7	26	12.2	24.3667	24.6167	11.3167	307	42	2	54.8062	121	16	19	110
C620BX	2021-12-20	Europe	Spain	36.79365	-2.71955	Crop	Solanum_lycopersicum_-Tomato-	Mediterranean_forest	Mediterranean	No_data	No_data	No_data	17.4458	10.8417	41.6987	545.996	31.7	5.7	26	12.2	24.3667	24.6167	11.3167	307	42	2	54.8062	121	16	19	110
C620FA	2021-12-20	Europe	Spain	36.79365	-2.71956	Crop	Solanum_lycopersicum_-Tomato-	Mediterranean_forest	Mediterranean	No_data	No_data	No_data	17.4458	10.8417	41.6987	545.996	31.7	5.7	26	12.2	24.3667	24.6167	11.3167	307	42	2	54.8062	121	16	19	110
C620FB	2021-12-20	Europe	Spain	36.79365	-2.71957	Crop	Solanum_lycopersicum_-Tomato-	Mediterranean_forest	Mediterranean	No_data	No_data	No_data	17.4458	10.8417	41.6987	545.996	31.7	5.7	26	12.2	24.3667	24.6167	11.3167	307	42	2	54.8062	121	16	19	110
C620FC	2021-12-20	Europe	Spain	36.79365	-2.71958	Crop	Solanum_lycopersicum_-Tomato-	Mediterranean_forest	Mediterranean	No_data	No_data	No_data	17.4458	10.8417	41.6987	545.996	31.7	5.7	26	12.2	24.3667	24.6167	11.3167	307	42	2	54.8062	121	16	19	110
C620FD	2021-12-20	Europe	Spain	36.79365	-2.71959	Crop	Solanum_lycopersicum_-Tomato-	Mediterranean_forest	Mediterranean	No_data	No_data	No_data	17.4458	10.8417	41.6987	545.996	31.7	5.7	26	12.2	24.3667	24.6167	11.3167	307	42	2	54.8062	121	16	19	110
C620FE	2021-12-20	Europe	Spain	36.79365	-2.7196	Crop	Solanum_lycopersicum_-Tomato-	Mediterranean_forest	Mediterranean	No_data	No_data	No_data	17.4458	10.8417	41.6987	545.996	31.7	5.7	26	12.2	24.3667	24.6167	11.3167	307	42	2	54.8062	121	16	19	110
C620FF	2021-12-20	Europe	Spain	36.79365	-2.71961	Crop	Solanum_lycopersicum_-Tomato-	Mediterranean_forest	Mediterranean	No_data	No_data	No_data	17.4458	10.8417	41.6987	545.996	31.7	5.7	26	12.2	24.3667	24.6167	11.3167	307	42	2	54.8062	121	16	19	110
C620W9	2021-12-20	Europe	Spain	36.849679	-2.33369	Natural	Pasture	Mediterranean_forest	Mediterranean	No_data	No_data	No_data	17.8542	10.9417	41.9221	544.875	32.1	6	26.1	15.25	24.7167	25.0167	11.7	210	30	1	52.0258	83	13	16	71
C620WH	2021-12-20	Europe	Spain	36.857147	-2.488121	Natural	Pasture	Mediterranean_forest	Mediterranean	No_data	No_data	No_data	17.3042	10.925	40.9176	569.687	32.1	5.4	26.7	14.4667	24.5667	24.7667	10.9167	256	33	2	51.5971	98	16	18	90
C620WK	2021-12-20	Europe	Spain	36.96185	-2.400138	Natural	Pasture	Mediterranean_forest	Mediterranean	No_data	No_data	No_data	15.95	12.1333	41.6953	614.876	32.4	3.3	29.1	9.95	23.9167	23.9667	9.08333	310	39	3	49.5382	115	21	23	107
C620WR	2021-12-20	Europe	Spain	36.849682	-2.33368	Natural	Pasture	Mediterranean_forest	Mediterranean	No_data	No_data	No_data	17.8542	10.9417	41.9221	544.875	32.1	6	26.1	15.25	24.7167	25.0167	11.7	210	30	1	52.0258	83	13	16	71
C621I7	2021-12-20	Europe	Spain	36.849685	-2.33355	Natural	Pasture	Mediterranean_forest	Mediterranean	No_data	No_data	No_data	17.8542	10.9417	41.9221	544.875	32.1	6	26.1	15.25	24.7167	25.0167	11.7	210	30	1	52.0258	83	13	16	71
C621JC	2021-12-20	Europe	Spain	36.96186	-2.400135	Natural	Pasture	Mediterranean_forest	Mediterranean	No_data	No_data	No_data	15.95	12.1333	41.6953	614.876	32.4	3.3	29.1	9.95	23.9167	23.9667	9.08333	310	39	3	49.5382	115	21	23	107
C621JD	2021-12-20	Europe	Spain	36.961841	-2.400131	Natural	Pasture	Mediterranean_forest	Mediterranean	No_data	No_data	No_data	15.95	12.1333	41.6953	614.876	32.4	3.3	29.1	9.95	23.9167	23.9667	9.08333	310	39	3	49.5382	115	21	23	107
C621JE	2021-12-20	Europe	Spain	36.85711	-2.488102	Natural	Pasture	Mediterranean_forest	Mediterranean	No_data	No_data	No_data	17.3042	10.925	40.9176	569.687	32.1	5.4	26.7	14.4667	24.5667	24.7667	10.9167	256	33	2	51.5971	98	16	18	90
C621JG	2021-12-20	Europe	Spain	36.85712	-2.488125	Natural	Pasture	Mediterranean_forest	Mediterranean	No_data	No_data	No_data	17.3042	10.925	40.9176	569.687	32.1	5.4	26.7	14.4667	24.5667	24.7667	10.9167	256	33	2	51.5971	98	16	18	90
C620L2	2021-12-21	Europe	Spain	41.08814	-6.76349	Crop	Triticum_aestivum_-Wheat-	Mediterranean_forest	Mediterranean	No	No	No_data	14.4667	9.65	41.2393	491.317	27.4	4	23.4	8.83333	20.65	20.8167	8.83333	1032	151	13	55.7377	434	73	82	434
C620KQ	2021-12-21	Europe	Spain	41.120012	-6.695706	Natural	Quercus_pyrenaica_-Oak-	Mediterranean_forest	Mediterranean	No	No	No_data	12.7125	9.94167	38.9869	554.818	27.4	1.9	25.5	6.55	19.8667	20	6.55	1069	158	17	55.4122	454	83	85	454
C621A3	2021-12-21	Europe	Spain	39.927583	-3.414033	Crop	Pistaccia_vera_-Pistachio-	Mediterranean_forest	Mediterranean	No_data	No_data	No_data	14.0667	12.7167	38.4189	722.107	33.3	0.2	33.1	9.7	23.4167	23.55	6	426	54	9	41.9992	156	46	47	131
C620KR	2021-12-21	Europe	Spain	41.08814	-6.76349	Crop	Prunus_dulcis_-Almond-	Mediterranean_forest	Mediterranean	No	No	No_data	14.4667	9.65	41.2393	491.317	27.4	4	23.4	8.83333	20.65	20.8167	8.83333	1032	151	13	55.7377	434	73	82	434
C620KS	2021-12-21	Europe	Spain	41.08814	-6.76349	Crop	Prunus_dulcis_-Almond-	Mediterranean_forest	Mediterranean	No	No	No_data	14.4667	9.65	41.2393	491.317	27.4	4	23.4	8.83333	20.65	20.8167	8.83333	1032	151	13	55.7377	434	73	82	434
C620KT	2021-12-21	Europe	Spain	41.08814	-6.76349	Crop	Prunus_dulcis_-Almond-	Mediterranean_forest	Mediterranean	No	No	No_data	14.4667	9.65	41.2393	491.317	27.4	4	23.4	8.83333	20.65	20.8167	8.83333	1032	151	13	55.7377	434	73	82	434
C620KU	2021-12-21	Europe	Spain	41.08814	-6.76349	Crop	Prunus_dulcis_-Almond-	Mediterranean_forest	Mediterranean	No	No	No_data	14.4667	9.65	41.2393	491.317	27.4	4	23.4	8.83333	20.65	20.8167	8.83333	1032	151	13	55.7377	434	73	82	434
C620KV	2021-12-21	Europe	Spain	41.08814	-6.76349	Crop	Prunus_dulcis_-Almond-	Mediterranean_forest	Mediterranean	No	No	No_data	14.4667	9.65	41.2393	491.317	27.4	4	23.4	8.83333	20.65	20.8167	8.83333	1032	151	13	55.7377	434	73	82	434
C620KW	2021-12-21	Europe	Spain	41.08814	-6.76349	Crop	Prunus_dulcis_-Almond-	Mediterranean_forest	Mediterranean	No	No	No_data	14.4667	9.65	41.2393	491.317	27.4	4	23.4	8.83333	20.65	20.8167	8.83333	1032	151	13	55.7377	434	73	82	434
C620KX	2021-12-21	Europe	Spain	41.08814	-6.76349	Crop	Prunus_dulcis_-Almond-	Mediterranean_forest	Mediterranean	No	No	No_data	14.4667	9.65	41.2393	491.317	27.4	4	23.4	8.83333	20.65	20.8167	8.83333	1032	151	13	55.7377	434	73	82	434
C620KY	2021-12-21	Europe	Spain	41.08814	-6.76349	Crop	Prunus_dulcis_-Almond-	Mediterranean_forest	Mediterranean	No	No	No_data	14.4667	9.65	41.2393	491.317	27.4	4	23.4	8.83333	20.65	20.8167	8.83333	1032	151	13	55.7377	434	73	82	434
C620KZ	2021-12-21	Europe	Spain	41.08814	-6.76349	Crop	Prunus_dulcis_-Almond-	Mediterranean_forest	Mediterranean	No	No	No_data	14.4667	9.65	41.2393	491.317	27.4	4	23.4	8.83333	20.65	20.8167	8.83333	1032	151	13	55.7377	434	73	82	434
C620L0	2021-12-21	Europe	Spain	41.08814	-6.76349	Crop	Prunus_dulcis_-Almond-	Mediterranean_forest	Mediterranean	No	No	No_data	14.4667	9.65	41.2393	491.317	27.4	4	23.4	8.83333	20.65	20.8167	8.83333	1032	151	13	55.7377	434	73	82	434
C620L1	2021-12-21	Europe	Spain	41.08814	-6.76349	Crop	Prunus_dulcis_-Almond-	Mediterranean_forest	Mediterranean	No	No	No_data	14.4667	9.65	41.2393	491.317	27.4	4	23.4	8.83333	20.65	20.8167	8.83333	1032	151	13	55.7377	434	73	82	434
C620L3	2021-12-21	Europe	Spain	41.08814	-6.76349	Crop	Prunus_dulcis_-Almond-	Mediterranean_forest	Mediterranean	No	No	No_data	14.4667	9.65	41.2393	491.317	27.4	4	23.4	8.83333	20.65	20.8167	8.83333	1032	151	13	55.7377	434	73	82	434
C620LO	2021-12-21	Europe	Spain	41.08814	-6.76349	Crop	Prunus_dulcis_-Almond-	Mediterranean_forest	Mediterranean	No	No	No_data	14.4667	9.65	41.2393	491.317	27.4	4	23.4	8.83333	20.65	20.8167	8.83333	1032	151	13	55.7377	434	73	82	434
C620LP	2021-12-21	Europe	Spain	41.08814	-6.76349	Crop	Prunus_dulcis_-Almond-	Mediterranean_forest	Mediterranean	No	No	No_data	14.4667	9.65	41.2393	491.317	27.4	4	23.4	8.83333	20.65	20.8167	8.83333	1032	151	13	55.7377	434	73	82	434
C620LQ	2021-12-21	Europe	Spain	41.08814	-6.76349	Crop	Prunus_dulcis_-Almond-	Mediterranean_forest	Mediterranean	No	No	No_data	14.4667	9.65	41.2393	491.317	27.4	4	23.4	8.83333	20.65	20.8167	8.83333	1032	151	13	55.7377	434	73	82	434
C620LR	2021-12-21	Europe	Spain	41.08814	-6.76349	Crop	Prunus_dulcis_-Almond-	Mediterranean_forest	Mediterranean	No	No	No_data	14.4667	9.65	41.2393	491.317	27.4	4	23.4	8.83333	20.65	20.8167	8.83333	1032	151	13	55.7377	434	73	82	434
C620LS	2021-12-21	Europe	Spain	41.08814	-6.76349	Crop	Prunus_dulcis_-Almond-	Mediterranean_forest	Mediterranean	No	No	No_data	14.4667	9.65	41.2393	491.317	27.4	4	23.4	8.83333	20.65	20.8167	8.83333	1032	151	13	55.7377	434	73	82	434
C620LT	2021-12-21	Europe	Spain	41.08814	-6.76349	Crop	Prunus_dulcis_-Almond-	Mediterranean_forest	Mediterranean	No	No	No_data	14.4667	9.65	41.2393	491.317	27.4	4	23.4	8.83333	20.65	20.8167	8.83333	1032	151	13	55.7377	434	73	82	434
C620LU	2021-12-21	Europe	Spain	41.08814	-6.76349	Crop	Prunus_dulcis_-Almond-	Mediterranean_forest	Mediterranean	No	No	No_data	14.4667	9.65	41.2393	491.317	27.4	4	23.4	8.83333	20.65	20.8167	8.83333	1032	151	13	55.7377	434	73	82	434
C620LV	2021-12-21	Europe	Spain	41.08814	-6.76349	Crop	Prunus_dulcis_-Almond-	Mediterranean_forest	Mediterranean	No	No	No_data	14.4667	9.65	41.2393	491.317	27.4	4	23.4	8.83333	20.65	20.8167	8.83333	1032	151	13	55.7377	434	73	82	434
C620LW	2021-12-21	Europe	Spain	41.08814	-6.76349	Crop	Prunus_dulcis_-Almond-	Mediterranean_forest	Mediterranean	No	No	No_data	14.4667	9.65	41.2393	491.317	27.4	4	23.4	8.83333	20.65	20.8167	8.83333	1032	151	13	55.7377	434	73	82	434
C620LX	2021-12-21	Europe	Spain	41.08814	-6.76349	Crop	Prunus_dulcis_-Almond-	Mediterranean_forest	Mediterranean	No	No	No_data	14.4667	9.65	41.2393	491.317	27.4	4	23.4	8.83333	20.65	20.8167	8.83333	1032	151	13	55.7377	434	73	82	434
C621AM	2021-12-22	Europe	Spain	39.879370	-2.958272	Crop	Pistaccia_vera_-Pistachio-	Mediterranean_forest	Mediterranean	No_data	No_data	No_data	13.6458	13.1583	39.5145	715.883	33	-0.3	33.3	9.35	22.9333	23.0333	5.65	458	56	10	40.8196	163	49	52	143
C6213U	2021-12-23	Europe	Spain	41.36326	-4.610647	Crop	Zea_mays_-Corn-	Mediterranean_forest	Mediterranean	Yes	Yes	Chemical	12.0792	12.175	40.5833	639.54	29.6	-0.4	30	8.26667	20.1833	20.2833	4.71667	401	48	15	32.8367	130	61	67	114
C62010	2021-12-23	Europe	Spain	37.0710955	-4.5052076	Crop	Olea_europea_-Olive-	Mediterranean_forest	Mediterranean	No_data	No_data	No_data	16.1125	13.1417	43.3718	607.705	33.5	3.2	30.3	10.2167	23.85	24.1667	9.31667	591	95	2	63.9249	266	24	28	247
C6201Z	2021-12-23	Europe	Spain	37.0722557	-4.5034246	Crop	Olea_europea_-Olive-	Mediterranean_forest	Mediterranean	No_data	No_data	No_data	16.1125	13.1417	43.3718	607.705	33.5	3.2	30.3	10.2167	23.85	24.1667	9.31667	591	95	2	63.9249	266	24	28	247
C6209C	2021-12-23	Europe	Spain	37.0702702	-4.5075659	Crop	Olea_europea_-Olive-	Mediterranean_forest	Mediterranean	No_data	No_data	No_data	16.1125	13.1417	43.3718	607.705	33.5	3.2	30.3	10.2167	23.85	24.1667	9.31667	591	95	2	63.9249	266	24	28	247
C6209G	2021-12-23	Europe	Spain	37.0727324	-4.502051	Crop	Olea_europea_-Olive-	Mediterranean_forest	Mediterranean	No_data	No_data	No_data	16.1125	13.1417	43.3718	607.705	33.5	3.2	30.3	10.2167	23.85	24.1667	9.31667	591	95	2	63.9249	266	24	28	247
C6213S	2021-12-23	Europe	Spain	41.352121	-4.598604	Crop	Pisum_sativum_-Pea-	Mediterranean_forest	Mediterranean	Yes	Yes	Chemical	12.0667	12.1667	40.5556	640.793	29.6	-0.4	30	8.25	20.1833	20.2833	4.68333	402	48	15	32.7117	131	61	66	114
C621AU	2021-12-23	Europe	Spain	39.558001	-3.822115	Crop	Pistaccia_vera_-Pistachio-	Mediterranean_forest	Mediterranean	No_data	No_data	No_data	14.5792	12.375	37.844	721.89	33.5	0.8	32.7	10.1333	23.8667	24.0833	6.48333	415	52	9	39.6797	144	45	52	125
C6213T	2021-12-23	Europe	Spain	41.361469	-4.5976	Crop	Daucus_carota_-Carrot-	Mediterranean_forest	Mediterranean	Yes	Yes	Chemical	11.8875	12.1083	40.3611	642.626	29.4	-0.6	30	8.06667	20.05	20.1333	4.5	410	49	15	32.6442	133	62	68	117
C6213V	2021-12-23	Europe	Spain	41.353102	-4.561951	Crop	Daucus_carota_-Carrot-	Mediterranean_forest	Mediterranean	Yes	Yes	Chemical	12.1542	12.3417	40.8664	643.744	29.8	-0.4	30.2	8.3	20.3333	20.4333	4.76667	401	48	15	32.7666	130	60	66	114
C6213W	2021-12-23	Europe	Spain	41.354487	-4.569177	Crop	Daucus_carota_-Carrot-	Mediterranean_forest	Mediterranean	Yes	Yes	Chemical	12.0292	12.2417	40.5353	644.319	29.7	-0.5	30.2	8.18333	20.2167	20.3167	4.65	406	49	15	33.0248	132	61	66	116
C6213Q	2021-12-23	Europe	Spain	41.368053	-4.591171	Crop	Brassica_napus_-Rapeseed-	Mediterranean_forest	Mediterranean	Yes	Yes	Chemical	11.6875	11.9917	40.1059	644.092	29.2	-0.7	29.9	7.86667	19.9	19.9833	4.31667	421	50	16	32.9496	138	63	70	120
C6213R	2021-12-23	Europe	Spain	41.357229	-4.588016	Crop	Brassica_napus_-Rapeseed-	Mediterranean_forest	Mediterranean	Yes	Yes	Chemical	12.0458	12.1917	40.5039	642.168	29.6	-0.5	30.1	8.21667	20.1833	20.2833	4.65	403	48	15	32.6552	131	61	67	114
C6213X	2021-12-23	Europe	Spain	41.373187	-4.616529	Crop	Brassica_napus_-Rapeseed-	Mediterranean_forest	Mediterranean	Yes	Yes	Chemical	11.9667	12.1333	40.4444	641.002	29.5	-0.5	30	5.18333	20.1167	20.1833	4.6	405	48	15	33.3372	133	61	67	116
C621ES	2021-12-25	Europe	Spain	41.414201	-5.122906	Crop	Hordeum_vulgare_-Barley-	Mediterranean_forest	Mediterranean	No_data	No_data	No_data	12.1875	11.775	40.3253	623.145	29.2	0	29.2	5.63333	20.1167	20.15	5	441	52	16	32.3673	146	65	70	132
C621EG	2021-12-25	Europe	Spain	41.666604	-5.476609	Crop	Hordeum_vulgare_-Barley-	Mediterranean_forest	Mediterranean	No_data	No_data	No_data	12.2417	11.4167	39.6412	618.3	29.1	0.3	28.8	5.88333	20.2333	20.2333	5.18333	536	69	16	37.2477	191	67	67	183
C621ED	2021-12-25	Europe	Spain	41.038961	-5.570924	Crop	Hordeum_vulgare_-Barley-	Mediterranean_forest	Mediterranean	No_data	No_data	No_data	11.9208	12.0583	40.3289	627.812	29.6	-0.3	29.9	5.41667	20.0167	20.0167	4.78333	484	59	14	35.3219	166	64	64	157
C621C5	2021-12-25	Europe	Spain	41.67927	-5.496983	Crop	Hordeum_vulgare_-Barley-	Mediterranean_forest	Mediterranean	No_data	No_data	No_data	12.4	11.5	39.9306	616.541	29.2	0.4	28.8	6.03333	20.35	20.35	5.35	546	70	17	37.107	193	69	69	185
C621EY	2021-12-25	Europe	Spain	41.35474	-5.102061	Crop	Hordeum_vulgare_-Barley-	Mediterranean_forest	Mediterranean	No_data	No_data	No_data	12.1875	12.025	40.3523	631.733	29.6	-0.2	29.8	5.55	20.25	20.2667	4.93333	433	51	15	32.694	143	64	68	129
C6207C	2021-12-25	Europe	Spain	41.794856	-4.510319	Crop	Hordeum_vulgare_-Barley-	Mediterranean_forest	Mediterranean	No_data	No_data	No_data	12.1875	12.0417	40.1389	644.456	29.8	-0.2	30	8.38333	20.4167	20.45	4.76667	395	48	14	34.6463	128	48	68	109
C6207F	2021-12-25	Europe	Spain	41.794856	-4.510319	Crop	Hordeum_vulgare_-Barley-	Mediterranean_forest	Mediterranean	No_data	No_data	No_data	12.1875	12.0417	40.1389	644.456	29.8	-0.2	30	8.38333	20.4167	20.45	4.76667	395	48	14	34.6463	128	48	68	109
C6208O	2021-12-25	Europe	Spain	41.77201	-4.500429	Crop	Hordeum_vulgare_-Barley-	Mediterranean_forest	Mediterranean	No_data	No_data	No_data	11.5833	11.85	39.5	649.49	29.3	-0.7	30	7.76667	19.9333	19.95	4.16667	430	52	16	33.6682	140	55	74	119
C6208Q	2021-12-25	Europe	Spain	41.770963	-4.515941	Crop	Hordeum_vulgare_-Barley-	Mediterranean_forest	Mediterranean	No_data	No_data	No_data	11.5875	11.8583	39.5278	649.042	29.3	-0.7	30	7.76667	19.9333	19.95	4.18333	430	51	17	33.2073	140	56	76	119
C621BM	2021-12-25	Europe	Spain	41.53878	-5.364842	Crop	Triticum_aestivum_-Wheat-	Mediterranean_forest	Mediterranean	No_data	No_data	No_data	12.3583	11.7333	40.5998	613.577	29.2	0.3	28.9	5.96667	20.2333	20.2333	5.31667	491	61	16	35.0247	170	65	65	160
C621EX	2021-12-25	Europe	Spain	41.541355	-5.365074	Crop	Triticum_aestivum_-Wheat-	Mediterranean_forest	Mediterranean	No_data	No_data	No_data	12.3583	11.7333	40.5998	613.577	29.2	0.3	28.9	5.96667	20.2333	20.2333	5.31667	491	61	16	35.0247	170	65	65	160
C621F7	2021-12-25	Europe	Spain	41.54408	-5.361303	Crop	Triticum_aestivum_-Wheat-	Mediterranean_forest	Mediterranean	No_data	No_data	No_data	12.2792	11.7417	40.6286	615.783	29.1	0.2	28.9	5.86667	20.1833	20.1833	5.21667	498	62	16	35.0652	172	66	66	162
C621BA	2021-12-25	Europe	Spain	41.650817	-5.448212	Crop	Triticum_aestivum_-Wheat-	Mediterranean_forest	Mediterranean	No_data	No_data	No_data	12.2042	11.5417	39.7989	618.398	29.2	0.2	29	5.85	20.2333	20.2333	5.16667	527	67	16	36.6989	186	66	66	177
C621C6	2021-12-25	Europe	Spain	41.650856	-5.454721	Crop	Triticum_aestivum_-Wheat-	Mediterranean_forest	Mediterranean	No_data	No_data	No_data	12.2167	11.55	39.8276	618.989	29.2	0.2	29	5.85	20.2333	20.2333	5.16667	527	68	16	37.2231	187	66	66	179
C621CF	2021-12-25	Europe	Spain	41.651505	-5.454614	Crop	Triticum_aestivum_-Wheat-	Mediterranean_forest	Mediterranean	No_data	No_data	No_data	12.2167	11.55	39.8276	618.989	29.2	0.2	29	5.85	20.2333	20.2333	5.16667	527	68	16	37.2231	187	66	66	179
C621DD	2021-12-25	Europe	Spain	41.651954	-5.448252	Crop	Triticum_aestivum_-Wheat-	Mediterranean_forest	Mediterranean	No_data	No_data	No_data	12.2042	11.5417	39.7989	618.398	29.2	0.2	29	5.85	20.2333	20.2333	5.16667	527	67	16	36.6989	186	66	66	177
C621BN	2021-12-25	Europe	Spain	41.412578	-5.120208	Crop	Triticum_aestivum_-Wheat-	Mediterranean_forest	Mediterranean	No_data	No_data	No_data	12.1875	11.775	40.3253	623.145	29.2	0	29.2	5.63333	20.1167	20.15	5	441	52	16	32.3673	146	65	70	132
C621CE	2021-12-25	Europe	Spain	41.414523	-5.122402	Crop	Triticum_aestivum_-Wheat-	Mediterranean_forest	Mediterranean	No_data	No_data	No_data	12.1875	11.775	40.3253	623.145	29.2	0	29.2	5.63333	20.1167	20.15	5	441	52	16	32.3673	146	65	70	132
C621BE	2021-12-25	Europe	Spain	41.664592	-5.478829	Crop	Triticum_aestivum_-Wheat-	Mediterranean_forest	Mediterranean	No_data	No_data	No_data	12.2417	11.4167	39.6412	618.3	29.1	0.3	28.8	5.88333	20.2333	20.2333	5.18333	536	69	16	37.2477	191	67	67	183
C621C3	2021-12-25	Europe	Spain	41.666283	-5.475879	Crop	Triticum_aestivum_-Wheat-	Mediterranean_forest	Mediterranean	No_data	No_data	No_data	12.2417	11.4167	39.6412	618.3	29.1	0.3	28.8	5.88333	20.2333	20.2333	5.18333	536	69	16	37.2477	191	67	67	183
C621DE	2021-12-25	Europe	Spain	41.662171	-5.478797	Crop	Triticum_aestivum_-Wheat-	Mediterranean_forest	Mediterranean	No_data	No_data	No_data	12.2417	11.4167	39.6412	618.3	29.1	0.3	28.8	5.88333	20.2333	20.2333	5.18333	536	69	16	37.2477	191	67	67	183
C621DO	2021-12-25	Europe	Spain	41.661915	-5.480578	Crop	Triticum_aestivum_-Wheat-	Mediterranean_forest	Mediterranean	No_data	No_data	No_data	ND	ND	ND	ND	ND	ND	ND	ND	ND	ND	ND	ND	ND	ND	ND	ND	ND	ND	ND
C621EF	2021-12-25	Europe	Spain	41.039657	-5.570173	Crop	Triticum_aestivum_-Wheat-	Mediterranean_forest	Mediterranean	No_data	No_data	No_data	11.9208	12.0583	40.3289	627.812	29.6	-0.3	29.9	5.41667	20.0167	20.0167	4.78333	484	59	14	35.3219	166	64	64	157
C621ET	2021-12-25	Europe	Spain	41.039875	-5.570817	Crop	Triticum_aestivum_-Wheat-	Mediterranean_forest	Mediterranean	No_data	No_data	No_data	11.9208	12.0583	40.3289	627.812	29.6	-0.3	29.9	5.41667	20.0167	20.0167	4.78333	484	59	14	35.3219	166	64	64	157
C6206L	2021-12-25	Europe	Spain	41.723548	-5.56991	Crop	Triticum_aestivum_-Wheat-	Mediterranean_forest	Mediterranean	No_data	No_data	No_data	12.4833	11.6333	40.1149	618.831	29.4	0.4	29	6.1	20.45	20.45	5.4	576	74	17	37.9215	205	72	72	197
C6206N	2021-12-25	Europe	Spain	41.733457	-5.58669	Crop	Triticum_aestivum_-Wheat-	Mediterranean_forest	Mediterranean	No_data	No_data	No_data	12.4167	11.5667	40.0231	618.004	29.3	0.4	28.9	6.03333	20.3833	20.3833	5.35	585	75	18	37.9364	208	73	73	201
C6206O	2021-12-25	Europe	Spain	41.746839	-5.586411	Crop	Triticum_aestivum_-Wheat-	Mediterranean_forest	Mediterranean	No_data	No_data	No_data	12.3667	11.5167	39.8501	617.128	29.2	0.3	28.9	5.98333	20.3	20.3	5.3	581	75	17	38.4578	208	71	71	200
C6206Q	2021-12-25	Europe	Spain	41.722851	-5.571809	Crop	Triticum_aestivum_-Wheat-	Mediterranean_forest	Mediterranean	No_data	No_data	No_data	12.4833	11.6333	40.1149	618.831	29.4	0.4	29	6.1	20.45	20.45	5.4	576	74	17	37.9215	205	72	72	197
C6206R	2021-12-25	Europe	Spain	41.732096	-5.591572	Crop	Triticum_aestivum_-Wheat-	Mediterranean_forest	Mediterranean	No_data	No_data	No_data	12.4417	11.6	40.1384	617.273	29.3	0.4	28.9	6.03333	20.3833	20.3833	5.36667	585	75	18	37.7034	208	73	73	200
C6206S	2021-12-25	Europe	Spain	41.717173	-5.570821	Crop	Triticum_aestivum_-Wheat-	Mediterranean_forest	Mediterranean	No_data	No_data	No_data	12.4833	11.6333	40.1149	618.831	29.4	0.4	29	6.1	20.45	20.45	5.4	576	74	17	37.9215	205	72	72	197
C6206T	2021-12-25	Europe	Spain	41.745814	-5.586958	Crop	Triticum_aestivum_-Wheat-	Mediterranean_forest	Mediterranean	No_data	No_data	No_data	12.3667	11.5167	39.8501	617.128	29.2	0.3	28.9	5.98333	20.3	20.3	5.3	581	75	17	38.4578	208	71	71	200
C6206U	2021-12-25	Europe	Spain	41.717462	-5.572474	Crop	Triticum_aestivum_-Wheat-	Mediterranean_forest	Mediterranean	No_data	No_data	No_data	12.4833	11.6333	40.1149	618.831	29.4	0.4	29	6.1	20.45	20.45	5.4	576	74	17	37.9215	205	72	72	197
C6206Y	2021-12-25	Europe	Spain	41.722371	-5.56991	Crop	Triticum_aestivum_-Wheat-	Mediterranean_forest	Mediterranean	No_data	No_data	No_data	12.4833	11.6333	40.1149	618.831	29.4	0.4	29	6.1	20.45	20.45	5.4	576	74	17	37.9215	205	72	72	197
C621C1	2021-12-25	Europe	Spain	41.709084	-5.570167	Crop	Triticum_aestivum_-Wheat-	Mediterranean_forest	Mediterranean	No_data	No_data	No_data	12.475	11.65	40.1724	617.732	29.4	0.4	29	6.1	20.4333	20.4333	5.4	576	74	17	37.9314	205	71	71	197
C621CD	2021-12-25	Europe	Spain	41.717902	-5.571197	Crop	Triticum_aestivum_-Wheat-	Mediterranean_forest	Mediterranean	No_data	No_data	No_data	12.4833	11.6333	40.1149	618.831	29.4	0.4	29	6.1	20.45	20.45	5.4	576	74	17	37.9215	205	72	72	197
C621EZ	2021-12-25	Europe	Spain	41.709492	-5.571551	Crop	Triticum_aestivum_-Wheat-	Mediterranean_forest	Mediterranean	No_data	No_data	No_data	12.475	11.65	40.1724	617.732	29.4	0.4	29	6.1	20.4333	20.4333	5.4	576	74	17	37.9314	205	71	71	197
C621C7	2021-12-25	Europe	Spain	41.651202	-5.479449	Crop	Triticum_aestivum_-Wheat-	Mediterranean_forest	Mediterranean	No_data	No_data	No_data	12.2333	11.4333	39.6991	618.177	29.1	0.3	28.8	5.86667	20.2167	20.2167	5.18333	535	69	16	37.5511	191	66	66	183
C621C8	2021-12-25	Europe	Spain	41.67778	-5.495653	Crop	Triticum_aestivum_-Wheat-	Mediterranean_forest	Mediterranean	No_data	No_data	No_data	12.4	11.5	39.9306	616.541	29.2	0.4	28.8	6.03333	20.35	20.35	5.35	546	70	17	37.107	193	69	69	185
C621C9	2021-12-25	Europe	Spain	41.677459	-5.496876	Crop	Triticum_aestivum_-Wheat-	Mediterranean_forest	Mediterranean	No_data	No_data	No_data	12.4	11.5	39.9306	616.541	29.2	0.4	28.8	6.03333	20.35	20.35	5.35	546	70	17	37.107	193	69	69	185
C621CB	2021-12-25	Europe	Spain	41.672915	-5.493636	Crop	Triticum_aestivum_-Wheat-	Mediterranean_forest	Mediterranean	No_data	No_data	No_data	12.3167	11.45	39.7569	617.827	29.2	0.4	28.8	5.95	20.2833	20.2833	5.26667	544	70	17	37.2841	193	68	68	185
C621E4	2021-12-25	Europe	Spain	41.630649	-5.525446	Crop	Triticum_aestivum_-Wheat-	Mediterranean_forest	Mediterranean	No_data	No_data	No_data	12.1458	11.3583	39.4387	620.354	29	0.2	28.8	5.76667	20.15	20.15	5.08333	563	72	17	37.3056	200	70	70	192
C621E8	2021-12-25	Europe	Spain	41.651154	-5.480232	Crop	Triticum_aestivum_-Wheat-	Mediterranean_forest	Mediterranean	No_data	No_data	No_data	12.2333	11.4333	39.6991	618.177	29.1	0.3	28.8	5.86667	20.2167	20.2167	5.18333	535	69	16	37.5511	191	66	66	183
C621ER	2021-12-25	Europe	Spain	41.628243	-5.527377	Crop	Triticum_aestivum_-Wheat-	Mediterranean_forest	Mediterranean	No_data	No_data	No_data	12.1458	11.3583	39.4387	620.354	29	0.2	28.8	5.76667	20.15	20.15	5.08333	563	72	17	37.3056	200	70	70	192
C621F3	2021-12-25	Europe	Spain	41.673564	-5.494172	Crop	Triticum_aestivum_-Wheat-	Mediterranean_forest	Mediterranean	No_data	No_data	No_data	12.3167	11.45	39.7569	617.827	29.2	0.4	28.8	5.95	20.2833	20.2833	5.26667	544	70	17	37.2841	193	68	68	185
C621CK	2021-12-25	Europe	Spain	41.356979	-5.102394	Crop	Triticum_aestivum_-Wheat-	Mediterranean_forest	Mediterranean	No_data	No_data	No_data	12.1875	12.025	40.3523	631.733	29.6	-0.2	29.8	5.55	20.25	20.2667	4.93333	433	51	15	32.694	143	64	68	129
C621CA	2021-12-25	Europe	Spain	41.097952	-5.493736	Crop	Triticum_aestivum_-Wheat-	Mediterranean_forest	Mediterranean	No_data	No_data	No_data	11.8833	12.1	40.604	625.991	29.6	-0.2	29.8	5.41667	19.95	19.95	4.75	463	55	14	34.4957	156	63	63	145
C621DW	2021-12-25	Europe	Spain	41.098263	-5.493065	Crop	Triticum_aestivum_-Wheat-	Mediterranean_forest	Mediterranean	No_data	No_data	No_data	11.8833	12.1	40.604	625.991	29.6	-0.2	29.8	5.41667	19.95	19.95	4.75	463	55	14	34.4957	156	63	63	145
C621F6	2021-12-25	Europe	Spain	41.099266	-5.49144	Crop	Triticum_aestivum_-Wheat-	Mediterranean_forest	Mediterranean	No_data	No_data	No_data	11.8792	12.075	40.6566	624.731	29.5	-0.2	29.7	5.41667	19.9167	19.9167	4.75	458	55	14	34.6987	155	62	62	145
C621DC	2021-12-25	Europe	Spain	41.065193	-5.541483	Crop	Triticum_aestivum_-Wheat-	Mediterranean_forest	Mediterranean	No_data	No_data	No_data	11.9333	12.2667	40.753	627.348	29.8	-0.3	30.1	5.43333	20.0167	20.0167	4.8	469	57	14	35.225	160	63	63	150
C621DT	2021-12-25	Europe	Spain	41.065658	-5.540882	Crop	Triticum_aestivum_-Wheat-	Mediterranean_forest	Mediterranean	No_data	No_data	No_data	11.9333	12.2667	40.753	627.348	29.8	-0.3	30.1	5.43333	20.0167	20.0167	4.8	469	57	14	35.225	160	63	63	150
C621EV	2021-12-25	Europe	Spain	41.067559	-5.539176	Crop	Triticum_aestivum_-Wheat-	Mediterranean_forest	Mediterranean	No_data	No_data	No_data	11.9292	12.325	40.9468	627.239	29.8	-0.3	30.1	5.43333	20.0333	20.0333	4.8	472	57	14	35.0525	161	63	63	151
C6208N	2021-12-25	Europe	Spain	41.533146	-5.355606	Crop	Triticum_aestivum_-Wheat-	Mediterranean_forest	Mediterranean	No_data	No_data	No_data	12.3833	11.7333	40.5998	615.162	29.2	0.3	28.9	5.96667	20.25	20.2667	5.31667	488	61	16	34.9645	169	65	68	159
C62090	2021-12-25	Europe	Spain	41.532897	-5.356969	Crop	Triticum_aestivum_-Wheat-	Mediterranean_forest	Mediterranean	No_data	No_data	No_data	12.3833	11.7333	40.5998	615.162	29.2	0.3	28.9	5.96667	20.25	20.2667	5.31667	488	61	16	34.9645	169	65	68	159
C621CM	2021-12-25	Europe	Spain	41.065589	-5.541987	Crop	Lens_culinaris_-Lentil-	Mediterranean_forest	Mediterranean	No_data	No_data	No_data	11.9458	12.2917	40.8361	628.467	29.8	-0.3	30.1	5.43333	20.05	20.05	4.8	472	57	14	35.1003	162	63	63	152
C621C2	2021-12-25	Europe	Spain	41.662636	-5.480202	Crop	Mediago_sativa_-Alfalfa-	Mediterranean_forest	Mediterranean	No_data	No_data	No_data	12.2417	11.4167	39.6412	618.3	29.1	0.3	28.8	5.88333	20.2333	20.2333	5.18333	536	69	16	37.2477	191	67	67	183
C6206P	2021-12-25	Europe	Spain	41.732112	-5.588825	Crop	Mediago_sativa_-Alfalfa-	Mediterranean_forest	Mediterranean	No_data	No_data	No_data	12.4417	11.6	40.1384	617.273	29.3	0.4	28.9	6.03333	20.3833	20.3833	5.36667	585	75	18	37.7034	208	73	73	200
C6206W	2021-12-25	Europe	Spain	41.74567	-5.585435	Crop	Mediago_sativa_-Alfalfa-	Mediterranean_forest	Mediterranean	No_data	No_data	No_data	12.3667	11.5167	39.8501	617.128	29.2	0.3	28.9	5.98333	20.3	20.3	5.3	581	75	17	38.4578	208	71	71	200
C621BK	2021-12-25	Europe	Spain	41.709981	-5.57007	Crop	Mediago_sativa_-Alfalfa-	Mediterranean_forest	Mediterranean	No_data	No_data	No_data	12.475	11.65	40.1724	617.732	29.4	0.4	29	6.1	20.4333	20.4333	5.4	576	74	17	37.9314	205	71	71	197
C621CX	2021-12-25	Europe	Spain	41.17043217	-4.82243921	Crop	Pistaccia_vera_-Pistachio-	Mediterranean_forest	Mediterranean	No_data	No_data	No_data	11.8917	12.1	40.4682	632.516	29.5	-0.4	29.9	8.15	19.9667	20.0167	4.66667	395	48	14	32.9392	128	60	63	111
C621D2	2021-12-25	Europe	Spain	41.16923814	-4.82500934	Crop	Pistaccia_vera_-Pistachio-	Mediterranean_forest	Mediterranean	No_data	No_data	No_data	11.9167	12.1167	40.524	633.763	29.5	-0.4	29.9	8.2	20	20.05	4.66667	395	47	14	32.6015	128	60	64	111
C621EB	2021-12-25	Europe	Spain	41.16831643	-4.82264363	Crop	Pistaccia_vera_-Pistachio-	Mediterranean_forest	Mediterranean	No_data	No_data	No_data	11.8917	12.1	40.4682	632.516	29.5	-0.4	29.9	8.15	19.9667	20.0167	4.66667	395	48	14	32.9392	128	60	63	111
C621CY	2021-12-25	Europe	Spain	41.48890071	-4.12381018	Crop	Pistaccia_vera_-Pistachio-	Mediterranean_forest	Mediterranean	No_data	No_data	No_data	11.3542	11.8417	39.6042	652.946	28.8	-1.1	29.9	7.5	19.7	19.7667	3.86667	414	50	16	32.2185	134	59	70	119
C621EE	2021-12-25	Europe	Spain	41.48888073	-4.1263415	Crop	Pistaccia_vera_-Pistachio-	Mediterranean_forest	Mediterranean	No_data	No_data	No_data	11.3667	11.8667	39.6879	652.172	28.8	-1.1	29.9	7.53333	19.7	19.7667	3.88333	414	49	16	31.9713	134	59	70	119
C621BH	2021-12-25	Europe	Spain	41.5336679	-4.13465633	Crop	Pistaccia_vera_-Pistachio-	Mediterranean_forest	Mediterranean	No_data	No_data	No_data	11.4667	11.7333	39.3736	652.883	28.9	-0.9	29.8	7.63333	19.8	19.8833	3.98333	408	49	15	32.8713	131	56	69	116
C621D8	2021-12-25	Europe	Spain	41.50969707	-4.14823826	Crop	Pistaccia_vera_-Pistachio-	Mediterranean_forest	Mediterranean	No_data	No_data	No_data	11.3458	11.8083	39.4928	652.904	28.8	-1.1	29.9	7.5	19.7	19.75	3.86667	413	49	15	32.5393	133	58	70	118
C621DF	2021-12-25	Europe	Spain	41.50966835	-4.14669603	Crop	Pistaccia_vera_-Pistachio-	Mediterranean_forest	Mediterranean	No_data	No_data	No_data	11.3458	11.8083	39.4928	652.904	28.8	-1.1	29.9	7.5	19.7	19.75	3.86667	413	49	15	32.5393	133	58	70	118
C621E7	2021-12-25	Europe	Spain	41.51467093	-4.16157318	Crop	Pistaccia_vera_-Pistachio-	Mediterranean_forest	Mediterranean	No_data	No_data	No_data	11.35	11.8167	39.5206	652.937	28.8	-1.1	29.9	7.51667	19.7	19.75	3.86667	413	49	15	32.5839	134	58	70	118
C621BJ	2021-12-25	Europe	Spain	41.71817406	-4.71855237	Crop	Pistaccia_vera_-Pistachio-	Mediterranean_forest	Mediterranean	No_data	No_data	No_data	12.2542	12.0083	39.7627	646.935	30.1	-0.1	30.2	5.46667	20.55	20.5833	4.86667	430	52	17	33.086	141	61	72	124
C621EI	2021-12-25	Europe	Spain	41.23164362	-4.65365999	Crop	Pistaccia_vera_-Pistachio-	Mediterranean_forest	Mediterranean	No_data	No_data	No_data	11.7667	12.2	40.6667	640.349	29.4	-0.6	30	7.96667	19.9167	20	4.45	399	48	14	33.2694	129	60	66	113
C621BP	2021-12-25	Europe	Spain	41.15208864	-4.84587506	Crop	Pistaccia_vera_-Pistachio-	Mediterranean_forest	Mediterranean	No_data	No_data	No_data	12.0292	12.1583	40.6633	632.026	29.6	-0.3	29.9	8.3	20.1	20.15	4.81667	392	47	14	32.4227	126	61	64	110
C621CL	2021-12-25	Europe	Spain	41.1531984	-4.84438964	Crop	Pistaccia_vera_-Pistachio-	Mediterranean_forest	Mediterranean	No_data	No_data	No_data	12.0292	12.1583	40.6633	632.026	29.6	-0.3	29.9	8.3	20.1	20.15	4.81667	392	47	14	32.4227	126	61	64	110
C621BS	2021-12-25	Europe	Spain	41.4249487	-4.64303398	Crop	Pistaccia_vera_-Pistachio-	Mediterranean_forest	Mediterranean	No_data	No_data	No_data	12.2542	12.275	40.6457	641.644	29.9	-0.3	30.2	5.45	20.4	20.4667	4.85	404	48	15	33.0121	133	61	66	116
C621BY	2021-12-25	Europe	Spain	41.40038648	-4.62096228	Crop	Pistaccia_vera_-Pistachio-	Mediterranean_forest	Mediterranean	No_data	No_data	No_data	11.9125	12.1417	40.3378	643.436	29.5	-0.6	30.1	5.13333	20.1167	20.1667	4.53333	413	48	16	32.383	136	63	69	119
C621CI	2021-12-25	Europe	Spain	41.41653284	-4.69817065	Crop	Pistaccia_vera_-Pistachio-	Mediterranean_forest	Mediterranean	No_data	No_data	No_data	12.1833	12.15	40.2318	640.463	29.9	-0.3	30.2	5.4	20.2833	20.3833	4.78333	400	47	15	32.8901	132	61	66	116
C621EN	2021-12-25	Europe	Spain	41.29754333	-4.65503502	Crop	Pistaccia_vera_-Pistachio-	Mediterranean_forest	Mediterranean	No_data	No_data	No_data	12.0917	12.2667	40.8889	637.462	29.7	-0.3	30	8.3	20.2	20.2667	4.78333	392	48	14	33.5414	127	59	64	111
C621EU	2021-12-25	Europe	Spain	41.28743767	-4.69847786	Crop	Pistaccia_vera_-Pistachio-	Mediterranean_forest	Mediterranean	No_data	No_data	No_data	12.0833	12.35	40.894	638.629	29.9	-0.3	30.2	8.3	20.2	20.3	4.76667	404	48	15	32.3408	130	62	67	114
C621C4	2021-12-25	Europe	Spain	41.35724174	-4.59910737	Crop	Pistaccia_vera_-Pistachio-	Mediterranean_forest	Mediterranean	No_data	No_data	No_data	12.0667	12.1667	40.5556	640.793	29.6	-0.4	30	8.25	20.1833	20.2833	4.68333	402	48	15	32.7117	131	61	66	114
C621CZ	2021-12-25	Europe	Spain	41.554894	-5.349054	Crop	Pistaccia_vera_-Pistachio-	Mediterranean_forest	Mediterranean	No_data	No_data	No_data	12.3	11.7667	40.5747	618.058	29.2	0.2	29	5.86667	20.2333	20.2333	5.21667	494	61	16	35.0713	170	65	65	159
C621D3	2021-12-25	Europe	Spain	41.526998	-5.343255	Crop	Pistaccia_vera_-Pistachio-	Mediterranean_forest	Mediterranean	No_data	No_data	No_data	12.3583	11.7333	40.5998	616.26	29.2	0.3	28.9	5.91667	20.2333	20.25	5.26667	484	60	15	35.9342	168	63	66	157
C621DA	2021-12-25	Europe	Spain	41.5395033024	-5.280752	Crop	Pistaccia_vera_-Pistachio-	Mediterranean_forest	Mediterranean	No_data	No_data	No_data	12.4167	11.8333	40.6644	616.513	29.4	0.3	29.1	5.96667	20.3	20.3	5.31667	470	58	15	34.69	161	63	67	150
C621DN	2021-12-25	Europe	Spain	41.526738	-5.344832	Crop	Pistaccia_vera_-Pistachio-	Mediterranean_forest	Mediterranean	No_data	No_data	No_data	12.3583	11.7333	40.5998	616.26	29.2	0.3	28.9	5.91667	20.2333	20.25	5.26667	484	60	15	35.9342	168	63	66	157
C621E0	2021-12-25	Europe	Spain	41.521906	-5.430431	Crop	Pistaccia_vera_-Pistachio-	Mediterranean_forest	Mediterranean	No_data	No_data	No_data	12.2292	11.3083	39.9588	608.812	28.6	0.3	28.3	5.88333	19.9833	20.0333	5.21667	519	65	16	35.915	181	67	71	171
C621E9	2021-12-25	Europe	Spain	41.550418	-5.263661	Crop	Pistaccia_vera_-Pistachio-	Mediterranean_forest	Mediterranean	No_data	No_data	No_data	12.3042	11.8417	40.693	616.325	29.2	0.1	29.1	5.85	20.2167	20.2167	5.21667	467	58	16	34.1743	160	64	64	149
C621F1	2021-12-25	Europe	Spain	41.508913	-5.314659	Crop	Pistaccia_vera_-Pistachio-	Mediterranean_forest	Mediterranean	No_data	No_data	No_data	12.3042	11.6583	40.4803	615.085	29.1	0.3	28.8	5.86667	20.1333	20.1833	5.21667	479	59	15	34.7741	165	64	68	154
C621EC	2021-12-25	Europe	Spain	41.68524908	-5.39140648	Crop	Pistaccia_vera_-Pistachio-	Mediterranean_forest	Mediterranean	No_data	No_data	No_data	12.1375	11.4417	39.8664	616.98	28.9	0.2	28.7	5.78333	20.1333	20.1333	5.08333	512	65	16	36.3188	179	65	65	169
C621CU	2021-12-25	Europe	Spain	41.52519132	-4.80372762	Crop	Pistaccia_vera_-Pistachio-	Mediterranean_forest	Mediterranean	No_data	No_data	No_data	12.1833	11.9	39.9329	637.279	29.7	-0.1	29.8	5.46667	20.25	20.35	4.81667	422	51	17	32.8605	142	64	70	125
C621EW	2021-12-25	Europe	Spain	41.632149	-5.526969	Crop	Pistaccia_vera_-Pistachio-	Mediterranean_forest	Mediterranean	No_data	No_data	No_data	12.1458	11.3583	39.4387	620.354	29	0.2	28.8	5.76667	20.15	20.15	5.08333	563	72	17	37.3056	200	70	70	192
C621EA	2021-12-25	Europe	Spain	41.359934	-5.103531	Crop	Pistaccia_vera_-Pistachio-	Mediterranean_forest	Mediterranean	No_data	No_data	No_data	12.1875	12.0083	40.2964	632.973	29.6	-0.2	29.8	8.46667	20.2667	20.2833	4.91667	439	51	16	31.898	143	66	70	130
C621D5	2021-12-25	Europe	Spain	41.408716	-5.117966	Crop	Prunus_dulcis_-Almond-	Mediterranean_forest	Mediterranean	No_data	No_data	No_data	12.1875	11.775	40.3253	623.145	29.2	0	29.2	5.63333	20.1167	20.15	5	441	52	16	32.3673	146	65	70	132
C621DJ	2021-12-25	Europe	Spain	41.394461	-5.1449	Crop	Prunus_dulcis_-Almond-	Mediterranean_forest	Mediterranean	No_data	No_data	No_data	12.2458	11.875	40.529	623.904	29.3	0	29.3	5.68333	20.1833	20.2167	5.05	439	52	15	33.1059	146	64	67	133
C621F5	2021-12-25	Europe	Spain	41.386726	-5.118153	Natural	Pasture	Mediterranean_forest	Mediterranean	No_data	No_data	No_data	12.2167	11.9167	40.259	629.37	29.5	-0.1	29.6	8.5	20.25	20.2667	5	445	52	16	32.4788	146	66	70	132
C621BI	2021-12-25	Europe	Spain	41.039293	-5.570463	Natural	Pasture	Mediterranean_forest	Mediterranean	No_data	No_data	No_data	11.9208	12.0583	40.3289	627.812	29.6	-0.3	29.9	5.41667	20.0167	20.0167	4.78333	484	59	14	35.3219	166	64	64	157
C621DK	2021-12-25	Europe	Spain	41.62765	-5.526508	Natural	Pasture	Mediterranean_forest	Mediterranean	No_data	No_data	No_data	ND	ND	ND	ND	ND	ND	ND	ND	ND	ND	ND	ND	ND	ND	ND	ND	ND	ND	ND
C6208T	2021-12-25	Europe	Spain	41.773263	-4.522442	Natural	Pasture	Mediterranean_forest	Mediterranean	No_data	No_data	No_data	11.625	11.8667	39.4241	649.732	29.4	-0.7	30.1	7.8	19.9667	20	4.2	426	51	16	33.8281	139	54	74	119
C621DG	2021-12-25	Europe	Spain	41.416776	-5.12974	Crop	Brassica_napus_-Rapeseed-	Mediterranean_forest	Mediterranean	No_data	No_data	No_data	12.2708	11.7583	40.4066	620.002	29.2	0.1	29.1	5.75	20.15	20.1833	5.1	435	52	15	33.4152	146	63	66	132
C621E2	2021-12-25	Europe	Spain	41.42348369	-4.64376021	Crop	Vitis_vinifera_-Vine-	Mediterranean_forest	Mediterranean	No_data	No_data	No_data	12.2542	12.275	40.6457	641.644	29.9	-0.3	30.2	5.45	20.4	20.4667	4.85	404	48	15	33.0121	133	61	66	116
C621BX	2021-12-25	Europe	Spain	41.508993	-5.266637	Crop	Vitis_vinifera_-Vine-	Mediterranean_forest	Mediterranean	No_data	No_data	No_data	12.3667	11.8	40.5498	616.737	29.3	0.2	29.1	5.9	20.2333	20.25	5.25	477	57	16	33.1907	160	66	70	149
C621F4	2021-12-25	Europe	Spain	41.547921	-5.262296	Crop	Vitis_vinifera_-Vine-	Mediterranean_forest	Mediterranean	No_data	No_data	No_data	12.3125	11.825	40.7759	615.283	29.2	0.2	29	5.86667	20.2	20.2	5.23333	467	58	16	34.4072	160	64	64	149
C621EJ	2021-12-25	Europe	Spain	41.387338	-5.11825	Crop	Vitis_vinifera_-Vine-	Mediterranean_forest	Mediterranean	No_data	No_data	No_data	12.2167	11.9167	40.259	629.37	29.5	-0.1	29.6	8.5	20.25	20.2667	5	445	52	16	32.4788	146	66	70	132
C6208R	2021-12-25	Europe	Spain	41.532174	-5.355649	Crop	Vitis_vinifera_-Vine-	Mediterranean_forest	Mediterranean	No_data	No_data	No_data	12.3833	11.7333	40.5998	615.162	29.2	0.3	28.9	5.96667	20.25	20.2667	5.31667	488	61	16	34.9645	169	65	68	159
C6213Y	2021-12-27	Europe	Spain	40.980969	-5.365039	Crop	Salix_viminalis_-Wicker-	Mediterranean_forest	Mediterranean	No	No	No_data	11.75	11.8167	40.6071	621.249	28.8	-0.3	29.1	8.06667	19.6	19.7	4.58333	418	49	13	33.6325	136	59	64	123
C62186	2021-12-28	Europe	Spain	40.999003	-5.343663	Natural	Quercus_ilex_-Spanish_Oak-	Mediterranean_forest	Mediterranean	No	No	No_data	11.7	11.8167	40.3299	625.002	28.9	-0.4	29.3	8.03333	19.6333	19.7167	4.51667	418	48	13	33.5482	138	59	64	124
C62187	2021-12-28	Europe	Spain	40.999003	-5.343663	Natural	Quercus_ilex_-Spanish_Oak-	Mediterranean_forest	Mediterranean	No	No	No_data	11.7	11.8167	40.3299	625.002	28.9	-0.4	29.3	8.03333	19.6333	19.7167	4.51667	418	48	13	33.5482	138	59	64	124
C6218C	2021-12-28	Europe	Spain	40.999003	-5.343663	Natural	Quercus_ilex_-Spanish_Oak-	Mediterranean_forest	Mediterranean	No	No	No_data	11.7	11.8167	40.3299	625.002	28.9	-0.4	29.3	8.03333	19.6333	19.7167	4.51667	418	48	13	33.5482	138	59	64	124
C6218D	2021-12-28	Europe	Spain	40.999003	-5.343663	Natural	Quercus_ilex_-Spanish_Oak-	Mediterranean_forest	Mediterranean	No	No	No_data	11.7	11.8167	40.3299	625.002	28.9	-0.4	29.3	8.03333	19.6333	19.7167	4.51667	418	48	13	33.5482	138	59	64	124
C6218E	2021-12-28	Europe	Spain	40.999003	-5.343663	Natural	Quercus_ilex_-Spanish_Oak-	Mediterranean_forest	Mediterranean	No	No	No_data	11.7	11.8167	40.3299	625.002	28.9	-0.4	29.3	8.03333	19.6333	19.7167	4.51667	418	48	13	33.5482	138	59	64	124
C6218H	2021-12-28	Europe	Spain	40.999003	-5.343663	Natural	Quercus_ilex_-Spanish_Oak-	Mediterranean_forest	Mediterranean	No	No	No_data	11.7	11.8167	40.3299	625.002	28.9	-0.4	29.3	8.03333	19.6333	19.7167	4.51667	418	48	13	33.5482	138	59	64	124
C6218J	2021-12-28	Europe	Spain	40.999003	-5.343663	Natural	Quercus_ilex_-Spanish_Oak-	Mediterranean_forest	Mediterranean	No	No	No_data	11.7	11.8167	40.3299	625.002	28.9	-0.4	29.3	8.03333	19.6333	19.7167	4.51667	418	48	13	33.5482	138	59	64	124
C6218L	2021-12-28	Europe	Spain	40.999003	-5.343663	Natural	Quercus_ilex_-Spanish_Oak-	Mediterranean_forest	Mediterranean	No	No	No_data	11.7	11.8167	40.3299	625.002	28.9	-0.4	29.3	8.03333	19.6333	19.7167	4.51667	418	48	13	33.5482	138	59	64	124
C6218P	2021-12-28	Europe	Spain	40.999003	-5.343663	Natural	Quercus_ilex_-Spanish_Oak-	Mediterranean_forest	Mediterranean	No	No	No_data	11.7	11.8167	40.3299	625.002	28.9	-0.4	29.3	8.03333	19.6333	19.7167	4.51667	418	48	13	33.5482	138	59	64	124
C6218R	2021-12-28	Europe	Spain	40.999003	-5.343663	Natural	Quercus_ilex_-Spanish_Oak-	Mediterranean_forest	Mediterranean	No	No	No_data	11.7	11.8167	40.3299	625.002	28.9	-0.4	29.3	8.03333	19.6333	19.7167	4.51667	418	48	13	33.5482	138	59	64	124
C6218S	2021-12-28	Europe	Spain	40.999003	-5.343663	Natural	Quercus_ilex_-Spanish_Oak-	Mediterranean_forest	Mediterranean	No	No	No_data	11.7	11.8167	40.3299	625.002	28.9	-0.4	29.3	8.03333	19.6333	19.7167	4.51667	418	48	13	33.5482	138	59	64	124
C6218U	2021-12-28	Europe	Spain	40.999003	-5.343663	Natural	Quercus_ilex_-Spanish_Oak-	Mediterranean_forest	Mediterranean	No	No	No_data	11.7	11.8167	40.3299	625.002	28.9	-0.4	29.3	8.03333	19.6333	19.7167	4.51667	418	48	13	33.5482	138	59	64	124
C6218W	2021-12-28	Europe	Spain	40.999003	-5.343663	Natural	Quercus_ilex_-Spanish_Oak-	Mediterranean_forest	Mediterranean	No	No	No_data	11.7	11.8167	40.3299	625.002	28.9	-0.4	29.3	8.03333	19.6333	19.7167	4.51667	418	48	13	33.5482	138	59	64	124
C6218Y	2021-12-28	Europe	Spain	40.999003	-5.343663	Natural	Quercus_ilex_-Spanish_Oak-	Mediterranean_forest	Mediterranean	No	No	No_data	11.7	11.8167	40.3299	625.002	28.9	-0.4	29.3	8.03333	19.6333	19.7167	4.51667	418	48	13	33.5482	138	59	64	124
C62192	2021-12-28	Europe	Spain	40.999003	-5.343663	Natural	Quercus_ilex_-Spanish_Oak-	Mediterranean_forest	Mediterranean	No	No	No_data	11.7	11.8167	40.3299	625.002	28.9	-0.4	29.3	8.03333	19.6333	19.7167	4.51667	418	48	13	33.5482	138	59	64	124
C62194	2021-12-28	Europe	Spain	40.999003	-5.343663	Natural	Quercus_ilex_-Spanish_Oak-	Mediterranean_forest	Mediterranean	No	No	No_data	11.7	11.8167	40.3299	625.002	28.9	-0.4	29.3	8.03333	19.6333	19.7167	4.51667	418	48	13	33.5482	138	59	64	124
C62196	2021-12-28	Europe	Spain	40.999003	-5.343663	Natural	Quercus_ilex_-Spanish_Oak-	Mediterranean_forest	Mediterranean	No	No	No_data	11.7	11.8167	40.3299	625.002	28.9	-0.4	29.3	8.03333	19.6333	19.7167	4.51667	418	48	13	33.5482	138	59	64	124
C62199	2021-12-28	Europe	Spain	40.999003	-5.343663	Natural	Quercus_ilex_-Spanish_Oak-	Mediterranean_forest	Mediterranean	No	No	No_data	11.7	11.8167	40.3299	625.002	28.9	-0.4	29.3	8.03333	19.6333	19.7167	4.51667	418	48	13	33.5482	138	59	64	124
C621JT	2021-12-28	Europe	Spain	40.999003	-5.343663	Natural	Quercus_ilex_-Spanish_Oak-	Mediterranean_forest	Mediterranean	No	No	No_data	11.7	11.8167	40.3299	625.002	28.9	-0.4	29.3	8.03333	19.6333	19.7167	4.51667	418	48	13	33.5482	138	59	64	124
C621JU	2021-12-28	Europe	Spain	40.999003	-5.343663	Natural	Quercus_ilex_-Spanish_Oak-	Mediterranean_forest	Mediterranean	No	No	No_data	11.7	11.8167	40.3299	625.002	28.9	-0.4	29.3	8.03333	19.6333	19.7167	4.51667	418	48	13	33.5482	138	59	64	124
C621JV	2021-12-28	Europe	Spain	40.999003	-5.343663	Natural	Quercus_ilex_-Spanish_Oak-	Mediterranean_forest	Mediterranean	No	No	No_data	11.7	11.8167	40.3299	625.002	28.9	-0.4	29.3	8.03333	19.6333	19.7167	4.51667	418	48	13	33.5482	138	59	64	124
C621JW	2021-12-28	Europe	Spain	40.999003	-5.343663	Natural	Quercus_ilex_-Spanish_Oak-	Mediterranean_forest	Mediterranean	No	No	No_data	11.7	11.8167	40.3299	625.002	28.9	-0.4	29.3	8.03333	19.6333	19.7167	4.51667	418	48	13	33.5482	138	59	64	124
C621JX	2021-12-28	Europe	Spain	40.999003	-5.343663	Natural	Quercus_ilex_-Spanish_Oak-	Mediterranean_forest	Mediterranean	No	No	No_data	11.7	11.8167	40.3299	625.002	28.9	-0.4	29.3	8.03333	19.6333	19.7167	4.51667	418	48	13	33.5482	138	59	64	124
C621JY	2021-12-28	Europe	Spain	40.999003	-5.343663	Natural	Quercus_ilex_-Spanish_Oak-	Mediterranean_forest	Mediterranean	No	No	No_data	11.7	11.8167	40.3299	625.002	28.9	-0.4	29.3	8.03333	19.6333	19.7167	4.51667	418	48	13	33.5482	138	59	64	124
C620NM	2021-12-28	Europe	Spain	40.879908	-5.587032	Natural	Quercus_ilex_-Spanish_Oak-	Mediterranean_forest	Mediterranean	No	No	No_data	11.9542	11.8083	39.6253	634.792	29.7	-0.1	29.8	5.41667	20.0833	20.1833	4.76667	505	62	14	37.0377	175	62	69	165
C620NN	2021-12-28	Europe	Spain	40.879908	-5.587032	Natural	Quercus_ilex_-Spanish_Oak-	Mediterranean_forest	Mediterranean	No	No	No_data	11.9542	11.8083	39.6253	634.792	29.7	-0.1	29.8	5.41667	20.0833	20.1833	4.76667	505	62	14	37.0377	175	62	69	165
C620NO	2021-12-28	Europe	Spain	40.879908	-5.587032	Natural	Quercus_ilex_-Spanish_Oak-	Mediterranean_forest	Mediterranean	No	No	No_data	11.9542	11.8083	39.6253	634.792	29.7	-0.1	29.8	5.41667	20.0833	20.1833	4.76667	505	62	14	37.0377	175	62	69	165
C620NP	2021-12-28	Europe	Spain	40.879908	-5.587032	Natural	Quercus_ilex_-Spanish_Oak-	Mediterranean_forest	Mediterranean	No	No	No_data	11.9542	11.8083	39.6253	634.792	29.7	-0.1	29.8	5.41667	20.0833	20.1833	4.76667	505	62	14	37.0377	175	62	69	165
C620NQ	2021-12-28	Europe	Spain	40.879908	-5.587032	Natural	Quercus_ilex_-Spanish_Oak-	Mediterranean_forest	Mediterranean	No	No	No_data	11.9542	11.8083	39.6253	634.792	29.7	-0.1	29.8	5.41667	20.0833	20.1833	4.76667	505	62	14	37.0377	175	62	69	165
C620NR	2021-12-28	Europe	Spain	40.879908	-5.587032	Natural	Quercus_ilex_-Spanish_Oak-	Mediterranean_forest	Mediterranean	No	No	No_data	11.9542	11.8083	39.6253	634.792	29.7	-0.1	29.8	5.41667	20.0833	20.1833	4.76667	505	62	14	37.0377	175	62	69	165
C620NS	2021-12-28	Europe	Spain	40.879908	-5.587032	Natural	Quercus_ilex_-Spanish_Oak-	Mediterranean_forest	Mediterranean	No	No	No_data	11.9542	11.8083	39.6253	634.792	29.7	-0.1	29.8	5.41667	20.0833	20.1833	4.76667	505	62	14	37.0377	175	62	69	165
C620NT	2021-12-28	Europe	Spain	40.879908	-5.587032	Natural	Quercus_ilex_-Spanish_Oak-	Mediterranean_forest	Mediterranean	No	No	No_data	11.9542	11.8083	39.6253	634.792	29.7	-0.1	29.8	5.41667	20.0833	20.1833	4.76667	505	62	14	37.0377	175	62	69	165
C620NU	2021-12-28	Europe	Spain	40.879908	-5.587032	Natural	Quercus_ilex_-Spanish_Oak-	Mediterranean_forest	Mediterranean	No	No	No_data	11.9542	11.8083	39.6253	634.792	29.7	-0.1	29.8	5.41667	20.0833	20.1833	4.76667	505	62	14	37.0377	175	62	69	165
C620NV	2021-12-28	Europe	Spain	40.879908	-5.587032	Natural	Quercus_ilex_-Spanish_Oak-	Mediterranean_forest	Mediterranean	No	No	No_data	11.9542	11.8083	39.6253	634.792	29.7	-0.1	29.8	5.41667	20.0833	20.1833	4.76667	505	62	14	37.0377	175	62	69	165
C620RX	2021-12-28	Europe	Spain	40.879908	-5.587032	Natural	Quercus_ilex_-Spanish_Oak-	Mediterranean_forest	Mediterranean	No	No	No_data	11.9542	11.8083	39.6253	634.792	29.7	-0.1	29.8	5.41667	20.0833	20.1833	4.76667	505	62	14	37.0377	175	62	69	165
C620RY	2021-12-28	Europe	Spain	40.879908	-5.587032	Natural	Quercus_ilex_-Spanish_Oak-	Mediterranean_forest	Mediterranean	No	No	No_data	11.9542	11.8083	39.6253	634.792	29.7	-0.1	29.8	5.41667	20.0833	20.1833	4.76667	505	62	14	37.0377	175	62	69	165
C620RZ	2021-12-28	Europe	Spain	40.879908	-5.587032	Natural	Quercus_ilex_-Spanish_Oak-	Mediterranean_forest	Mediterranean	No	No	No_data	11.9542	11.8083	39.6253	634.792	29.7	-0.1	29.8	5.41667	20.0833	20.1833	4.76667	505	62	14	37.0377	175	62	69	165
C620S0	2021-12-28	Europe	Spain	40.879908	-5.587032	Natural	Quercus_ilex_-Spanish_Oak-	Mediterranean_forest	Mediterranean	No	No	No_data	11.9542	11.8083	39.6253	634.792	29.7	-0.1	29.8	5.41667	20.0833	20.1833	4.76667	505	62	14	37.0377	175	62	69	165
C620S1	2021-12-28	Europe	Spain	40.879908	-5.587032	Natural	Quercus_ilex_-Spanish_Oak-	Mediterranean_forest	Mediterranean	No	No	No_data	11.9542	11.8083	39.6253	634.792	29.7	-0.1	29.8	5.41667	20.0833	20.1833	4.76667	505	62	14	37.0377	175	62	69	165
C620S2	2021-12-28	Europe	Spain	40.879908	-5.587032	Natural	Quercus_ilex_-Spanish_Oak-	Mediterranean_forest	Mediterranean	No	No	No_data	11.9542	11.8083	39.6253	634.792	29.7	-0.1	29.8	5.41667	20.0833	20.1833	4.76667	505	62	14	37.0377	175	62	69	165
C620S3	2021-12-28	Europe	Spain	40.879908	-5.587032	Natural	Quercus_ilex_-Spanish_Oak-	Mediterranean_forest	Mediterranean	No	No	No_data	11.9542	11.8083	39.6253	634.792	29.7	-0.1	29.8	5.41667	20.0833	20.1833	4.76667	505	62	14	37.0377	175	62	69	165
C620S4	2021-12-28	Europe	Spain	40.879908	-5.587032	Natural	Quercus_ilex_-Spanish_Oak-	Mediterranean_forest	Mediterranean	No	No	No_data	11.9542	11.8083	39.6253	634.792	29.7	-0.1	29.8	5.41667	20.0833	20.1833	4.76667	505	62	14	37.0377	175	62	69	165
C620S5	2021-12-28	Europe	Spain	40.879908	-5.587032	Natural	Quercus_ilex_-Spanish_Oak-	Mediterranean_forest	Mediterranean	No	No	No_data	11.9542	11.8083	39.6253	634.792	29.7	-0.1	29.8	5.41667	20.0833	20.1833	4.76667	505	62	14	37.0377	175	62	69	165
C620S6	2021-12-28	Europe	Spain	40.879908	-5.587032	Natural	Quercus_ilex_-Spanish_Oak-	Mediterranean_forest	Mediterranean	No	No	No_data	11.9542	11.8083	39.6253	634.792	29.7	-0.1	29.8	5.41667	20.0833	20.1833	4.76667	505	62	14	37.0377	175	62	69	165
C620VA	2021-12-28	Europe	Spain	40.918289	-5.615020	Natural	Quercus_ilex_-Spanish_Oak-	Mediterranean_forest	Mediterranean	No	No	No_data	12.0667	11.8833	39.877	629.954	29.7	-0.1	29.8	5.53333	20.1167	20.2	4.9	505	63	14	37.5369	177	62	68	168
C620VB	2021-12-28	Europe	Spain	40.918289	-5.615020	Natural	Quercus_ilex_-Spanish_Oak-	Mediterranean_forest	Mediterranean	No	No	No_data	12.0667	11.8833	39.877	629.954	29.7	-0.1	29.8	5.53333	20.1167	20.2	4.9	505	63	14	37.5369	177	62	68	168
C620VC	2021-12-28	Europe	Spain	40.918289	-5.615020	Natural	Quercus_ilex_-Spanish_Oak-	Mediterranean_forest	Mediterranean	No	No	No_data	12.0667	11.8833	39.877	629.954	29.7	-0.1	29.8	5.53333	20.1167	20.2	4.9	505	63	14	37.5369	177	62	68	168
C620VD	2021-12-28	Europe	Spain	40.918289	-5.615020	Natural	Quercus_ilex_-Spanish_Oak-	Mediterranean_forest	Mediterranean	No	No	No_data	12.0667	11.8833	39.877	629.954	29.7	-0.1	29.8	5.53333	20.1167	20.2	4.9	505	63	14	37.5369	177	62	68	168
C620VE	2021-12-28	Europe	Spain	40.918289	-5.615020	Natural	Quercus_ilex_-Spanish_Oak-	Mediterranean_forest	Mediterranean	No	No	No_data	12.0667	11.8833	39.877	629.954	29.7	-0.1	29.8	5.53333	20.1167	20.2	4.9	505	63	14	37.5369	177	62	68	168
C620VF	2021-12-28	Europe	Spain	40.918289	-5.615020	Natural	Quercus_ilex_-Spanish_Oak-	Mediterranean_forest	Mediterranean	No	No	No_data	12.0667	11.8833	39.877	629.954	29.7	-0.1	29.8	5.53333	20.1167	20.2	4.9	505	63	14	37.5369	177	62	68	168
C620VG	2021-12-28	Europe	Spain	40.918289	-5.615020	Natural	Quercus_ilex_-Spanish_Oak-	Mediterranean_forest	Mediterranean	No	No	No_data	12.0667	11.8833	39.877	629.954	29.7	-0.1	29.8	5.53333	20.1167	20.2	4.9	505	63	14	37.5369	177	62	68	168
C620VH	2021-12-28	Europe	Spain	40.918289	-5.615020	Natural	Quercus_ilex_-Spanish_Oak-	Mediterranean_forest	Mediterranean	No	No	No_data	12.0667	11.8833	39.877	629.954	29.7	-0.1	29.8	5.53333	20.1167	20.2	4.9	505	63	14	37.5369	177	62	68	168
C620VI	2021-12-28	Europe	Spain	40.918289	-5.615020	Natural	Quercus_ilex_-Spanish_Oak-	Mediterranean_forest	Mediterranean	No	No	No_data	12.0667	11.8833	39.877	629.954	29.7	-0.1	29.8	5.53333	20.1167	20.2	4.9	505	63	14	37.5369	177	62	68	168
C620VJ	2021-12-28	Europe	Spain	40.918289	-5.615020	Natural	Quercus_ilex_-Spanish_Oak-	Mediterranean_forest	Mediterranean	No	No	No_data	12.0667	11.8833	39.877	629.954	29.7	-0.1	29.8	5.53333	20.1167	20.2	4.9	505	63	14	37.5369	177	62	68	168
C620VK	2021-12-28	Europe	Spain	40.918289	-5.615020	Natural	Quercus_ilex_-Spanish_Oak-	Mediterranean_forest	Mediterranean	No	No	No_data	12.0667	11.8833	39.877	629.954	29.7	-0.1	29.8	5.53333	20.1167	20.2	4.9	505	63	14	37.5369	177	62	68	168
[truncated: 286 more rows]
